# Supplementary material for: Asymmetric Synthesis of Spiropyrazolones by Sequential Organo- and Silver Catalysis
Source: PubMed Central journal article supplement — Angew Chem Int Ed Engl. 2015 Dec 16;55(5):1797–800. doi: 10.1002/anie.201510602 (PMC4725220; doi:10.1002/anie.201510602), 2015-12-16
Supplement: anie0055-1797-sd1.pdf [file anie0055-1797-sd1.pdf]

## Supporting Information

### **Asymmetric Synthesis of Spiropyrazolones by Sequential Organo- and Silver Catalysis**

*Daniel Hack, Alexander B. Dürr, Kristina Deckers, Pankaj Chauhan, Nico Seling, Lukas Rübenach, Lucas Mertens, Gerhard Raabe, Franziska Schoenebeck,\* and Dieter Enders\**

anie\_201510602\_sm\_miscellaneous\_information.pdf

## **Inhalt**

|                                                        |     |
|--------------------------------------------------------|-----|
| 1.0 General Information.....                           | 2   |
| 2.0 Additional Screening Tables.....                   | 3   |
| 2.1 Catalyst screening .....                           | 3   |
| 2.2 Solvent Screening.....                             | 4   |
| 2.3 Influence of catalyst loading .....                | 4   |
| 2.4 Influence of the applied metal salt .....          | 5   |
| 2.5 Temperature influence .....                        | 5   |
| 3.0 General procedures .....                           | 6   |
| 3.1 Sonogashira Cross-Coupling.....                    | 6   |
| 3.2 TMS-cleavage .....                                 | 6   |
| 3.3 Synthesis of nitro olefines.....                   | 7   |
| 3.4 Asymmetric synthesis of spiropyrazolones.....      | 8   |
| 4.0 Experiments with deuterium-labeled substrates..... | 10  |
| 5.0 Computational details .....                        | 11  |
| 7.0 Crystal structures .....                           | 59  |
| 8.0 Mechanism.....                                     | 60  |
| 9.0 Analytical Data .....                              | 61  |
| 10.0 NMR Spectra .....                                 | 83  |
| 11.0 HPLC data.....                                    | 117 |

## 1.0 General Information

Unless otherwise noted, all commercially available compounds were used without further purification. For preparative column chromatography SIL G-25 UV252 from Macherey-Nagel, particle size 0.040-0.063 nm (230-240 mesh. flash) was used. Visualization of the developed TLC plates was performed with UV irradiation (254 nm) or by staining with KMnO<sub>4</sub>. Optical rotations were measured on a Perkin-Elmer 241 polarimeter. Mass spectra were recorded on a Finnigan SSQ7000 (EI 70 eV) spectrometer and high-resolution mass spectra on a Thermo Fisher Scientific Orbitrap XL spectrometer. IR spectra were recorded on a Perkin-Elmer FT-IR Spectrum 100 using ATR-Unit. <sup>1</sup>H, <sup>13</sup>C and <sup>19</sup>F spectra were recorded at ambient temperature on Varian Mercury 300, Inova 400, Varian VNMRS-400, or Varian VNMRS-600 spectrometers with TMS as an internal standard. Analytical HPLC was performed on a Hewlett-Packard 1100 Series instrument using chiral stationary phases (Daicel AD, Daicel AS, Daicel IA, Chiralpak IC, Chiralpak IB columns). Analytical SFC was performed on a THAR-SFC MethodStation II with a WATERS 2998 Photodiode Array Dectector using chiral stationary phases (Daicel Chiralpak IA, (*R, R*)-Whelk O1),

Abbreviations:

|                         |                                   |
|-------------------------|-----------------------------------|
| <b>OR</b>               | optical rotation                  |
| <b>EA</b>               | elemental analysis                |
| <b>CH<sub>Ar</sub></b>  | aromatic proton                   |
| <b>CH<sub>ol</sub></b>  | olefinic proton                   |
| <b>{<sup>19</sup>F}</b> | <sup>19</sup> F decoupled spectra |
| <b>{<sup>1</sup>H}</b>  | <sup>1</sup> H decoupled spectra  |

## 2.0 Additional Screening Tables

### 2.1 Catalyst screening

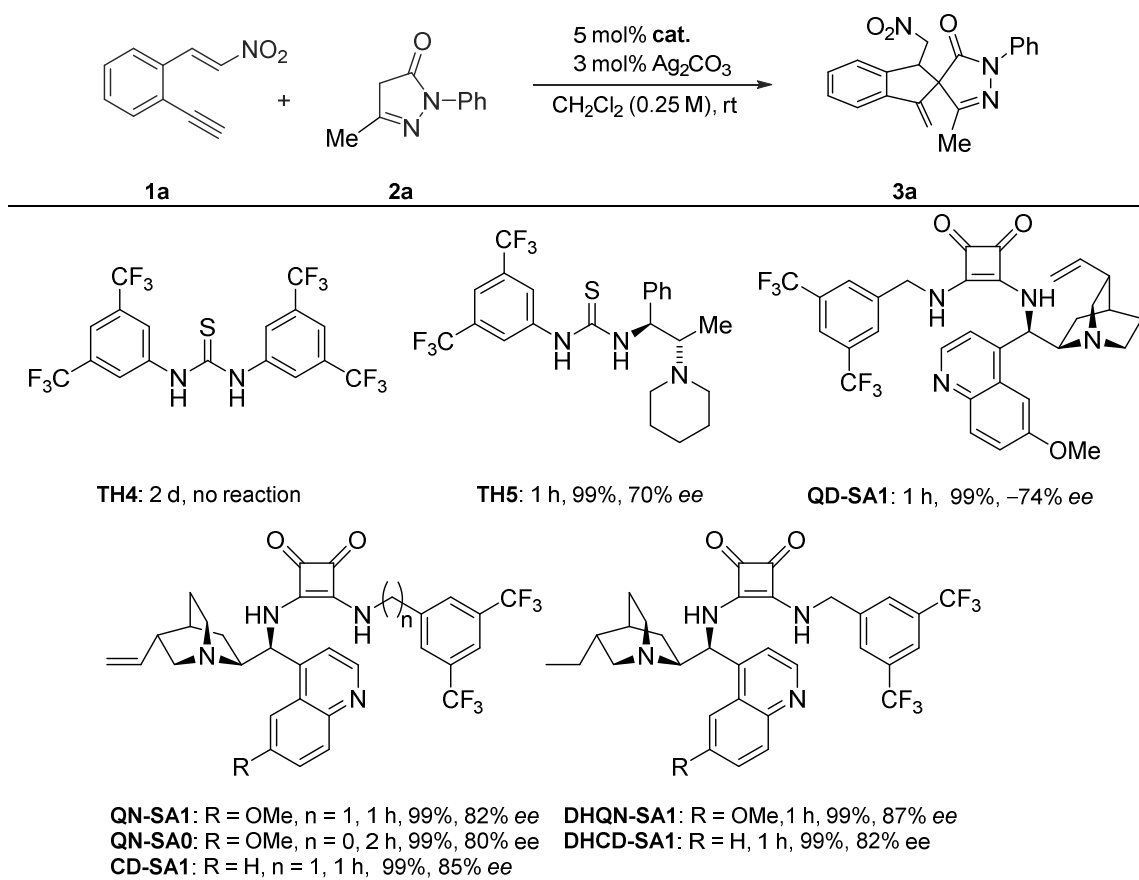

**Scheme 1** Catalyst influence. [Reaction conditions: **1a** (0.33 mmol), **2a** (0.30 mmol), organocatalyst (5 mol%), Ag<sub>2</sub>CO<sub>3</sub> (3 mol%), CH<sub>2</sub>Cl<sub>2</sub> (1.3 mL), rt]



## 2.2 Solvent Screening

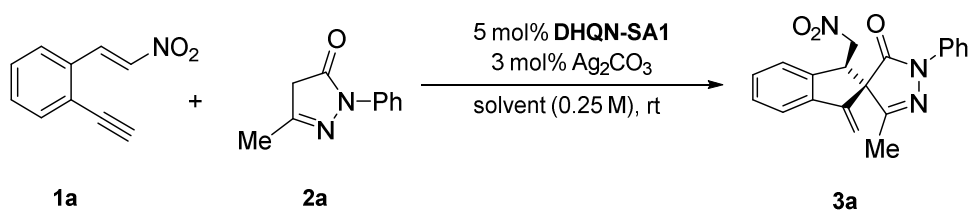

| No             | solvent                         | <i>t</i> [h] | yield [%] <sup>b</sup> | <i>ee</i> [%] <sup>c</sup> |
|----------------|---------------------------------|--------------|------------------------|----------------------------|
| 1              | CH <sub>2</sub> Cl <sub>2</sub> | 1            | 99                     | 87                         |
| 2              | CHCl <sub>3</sub>               | 1            | 99                     | 89                         |
| 3              | CCl <sub>4</sub>                | 24           | traces                 | -                          |
| 4              | 1,2-dichlorethane               | 5.5          | 67                     | 84                         |
| 5              | PhCl                            | 1            | 99                     | 84                         |
| 6              | toluene                         | 3            | 99                     | 83                         |
| 7 <sup>d</sup> | ether                           | 24+1         | 91                     | 71                         |

<sup>a</sup> Reaction conditions: **1a** (0.33 mmol), **2a** (0.30 mmol), **DHQN-SA1** (5 mol%), Ag<sub>2</sub>CO<sub>3</sub> (3 mol%), solvent (1.2 mL), rt. <sup>b</sup> >Yield of **3a** after flash chromatography. <sup>c</sup> Determined by HPLC using a chiral stationary phase. <sup>d</sup> Cyclisation only occurred after the addition of CH<sub>2</sub>Cl<sub>2</sub>.

## 2.3 Influence of catalyst loading

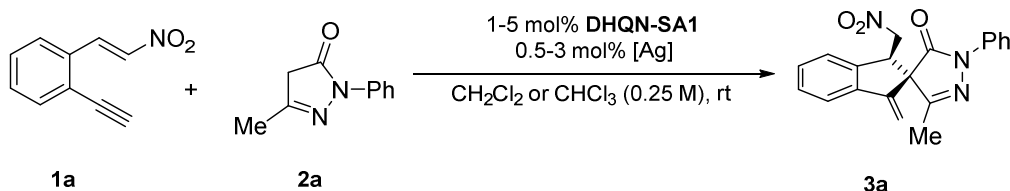

| No | DHQN-SA1 [mol%] | metal salt                               | solvent                         | <i>t</i> [h] | yield [%] | <i>ee</i> [%] |
|----|-----------------|------------------------------------------|---------------------------------|--------------|-----------|---------------|
| 1  | 5               | 3 mol% Ag <sub>2</sub> CO <sub>3</sub>   | CH <sub>2</sub> Cl <sub>2</sub> | 1            | 99        | 87            |
| 2  | 3               | 3 mol% Ag <sub>2</sub> CO <sub>3</sub>   | CH <sub>2</sub> Cl <sub>2</sub> | 1            | 99        | 87            |
| 3  | 1               | 3 mol% Ag <sub>2</sub> CO <sub>3</sub>   | CH <sub>2</sub> Cl <sub>2</sub> | 1            | 99        | 87            |
| 4  | 1               | 1 mol% Ag <sub>2</sub> CO <sub>3</sub>   | CH <sub>2</sub> Cl <sub>2</sub> | 1            | 99        | 82            |
| 5  | 1               | 0.5 mol% Ag <sub>2</sub> CO <sub>3</sub> | CH <sub>2</sub> Cl <sub>2</sub> | 4            | 38        | -             |
| 6  | 1               | 1 mol% Ag <sub>2</sub> O                 | CH <sub>2</sub> Cl <sub>2</sub> | 1            | 99        | 83            |
| 7  | 1               | 0.5 mol% Ag <sub>2</sub> O               | CH <sub>2</sub> Cl <sub>2</sub> | 25           | 21        | -             |
| 8  | 1               | 3 mol% Ag <sub>2</sub> CO <sub>3</sub>   | CHCl <sub>3</sub>               | 1            | 99        | 89            |
| 9  | 1               | 1 mol% Ag <sub>2</sub> CO <sub>3</sub>   | CHCl <sub>3</sub>               | 1.5          | 15        | -             |

<sup>a</sup> Reaction conditions: **1a** (0.33 mmol), **2a** (0.30 mmol), **DHQN-SA1** (1-5 mol%), silver salt (0.5-3 mol%), solvent (1.2 mL), rt. <sup>b</sup> Yield of **3a** after flash chromatography. <sup>c</sup> Determined by HPLC using a chiral stationary phase.

## 2.4 Influence of the applied metal salt

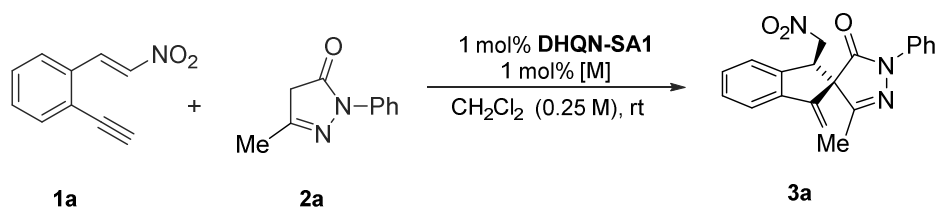

| № | 2a                                       |       | yield [%] <sup>b</sup> | ee [%] <sup>c</sup> |
|---|------------------------------------------|-------|------------------------|---------------------|
|   | cat.                                     | t [h] |                        |                     |
| 1 | Ag <sub>2</sub> CO <sub>3</sub>          | 1     | 99                     | 82                  |
| 2 | Ag <sub>2</sub> O                        | 0.75  | 99                     | 83                  |
| 3 | AgBF <sub>4</sub>                        | 2     | 99                     | 84                  |
| 4 | Cu(I)I                                   | 24    | 39                     | 87                  |
| 5 | PtCl <sub>2</sub>                        | 24    | 27                     | 86                  |
| 6 | PPh <sub>3</sub> AuCl/AgNTf <sub>2</sub> | 24    | 21                     | 84                  |

<sup>a</sup> Reaction conditions: **1a** (0.33 mmol), **2a** (0.30 mmol), **DHQN-SA1** (1-5 mol%), silver salt (0.5-3 mol%), CH<sub>2</sub>Cl<sub>2</sub> (1.2 ml), rt. <sup>b</sup> Yield of **3a** after flash chromatography. <sup>c</sup> Determined by HPLC using a chiral stationary phase.

## 2.5 Temperature influence

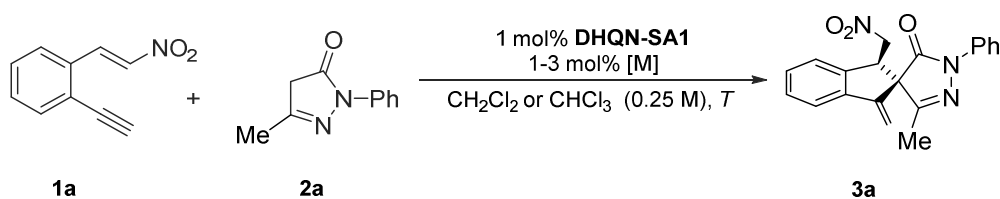

| № | 2a                                     |                                 | T [°C] | t [h] <sup>b</sup> | yield [%] <sup>c</sup> | ee [%] <sup>d</sup> |
|---|----------------------------------------|---------------------------------|--------|--------------------|------------------------|---------------------|
|   | Cat./loading                           | solvent                         |        |                    |                        |                     |
| 1 | 1 mol% Ag <sub>2</sub> CO <sub>3</sub> | CH <sub>2</sub> Cl <sub>2</sub> | RT     | 1                  | 99                     | 82                  |
| 2 | 1 mol% Ag <sub>2</sub> CO <sub>3</sub> | CH <sub>2</sub> Cl <sub>2</sub> | 0      | 1 + 1              | 99                     | 86                  |
| 3 | 1 mol% Ag <sub>2</sub> CO <sub>3</sub> | CH <sub>2</sub> Cl <sub>2</sub> | -20    | 1 + 1              | 99                     | 85                  |
| 4 | 1 mol% Ag <sub>2</sub> CO <sub>3</sub> | CH <sub>2</sub> Cl <sub>2</sub> | -40    | 18 + 1,5           | 15                     | -                   |
| 5 | 3 mol% Ag <sub>2</sub> CO <sub>3</sub> | CH <sub>2</sub> Cl <sub>2</sub> | -40    | 18 + 1             | 64                     | 91                  |
| 6 | 3 mol% Ag <sub>2</sub> CO <sub>3</sub> | CHCl <sub>3</sub>               | -40    | 18 + 1.5           | 82                     | 94                  |
| 7 | 3 mol% Ag <sub>2</sub> O               | CHCl <sub>3</sub>               | -40    | 20 + 0.75          | 99                     | 94                  |

<sup>a</sup> Reaction conditions: **1a** (0.33 mmol), **2a** (0.3 mmol), **DHQN-SA1** (1 mol%), silver salt (1-3 mol%), solvent (1.2 mL), -40 °C-RT. <sup>b</sup> Combined reaction time (low temperature + RT). <sup>c</sup> Yield of **3a** after flash chromatography. <sup>d</sup> Determined by HPLC using a chiral stationary phase.

## 3.0 General procedures

### 3.1 Sonogashira Cross-Coupling

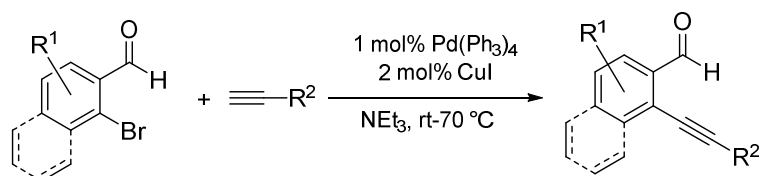

Under an atmosphere of argon, the alkyne (1.1 equiv.) was added to a suspension of arylbromide (1.0 equiv.), CuI (2 mol%) and Pd(PPh<sub>3</sub>)<sub>4</sub> (1 mol%) in degassed NEt<sub>3</sub> (2 mL/mmol substrate) and the reaction mixture was stirred until complete conversion of the starting materials at room temperature. Water was added, the product was extracted with CH<sub>2</sub>Cl<sub>2</sub> and the combined organic layers were dried over MgSO<sub>4</sub>. The solvent was removed under reduced pressure and the corresponding alkynylated aldehydes was obtained after flash chromatography with silica (*n*-pentane/Et<sub>2</sub>O, dry loading).

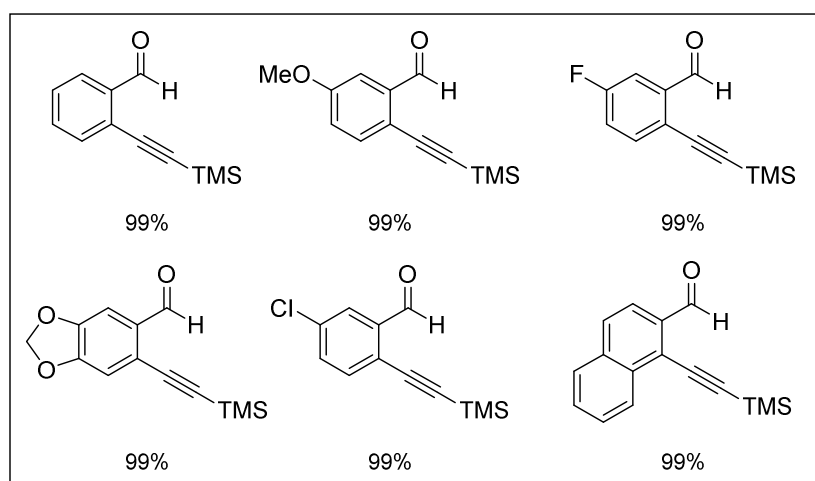

### 3.2 TMS-cleavage

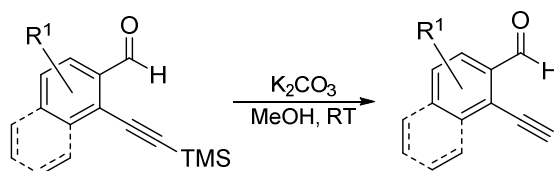

A suspension of the aldehyde (1.0 equiv.) and K<sub>2</sub>CO<sub>3</sub> (2.0 equiv.) in freshly distilled MeOH (0.05 M) was stirred at room temperature until complete conversion of the substrate was observed. The solvent was removed under reduced pressure, and the deprotected aldehyde was obtained after flash chromatography on silica (*n*-pentane/Et<sub>2</sub>O).

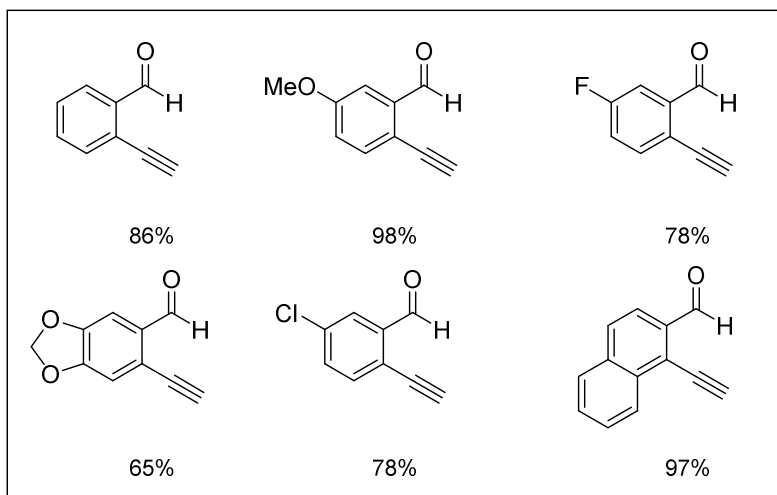

### 3.3 Synthesis of nitro olefines

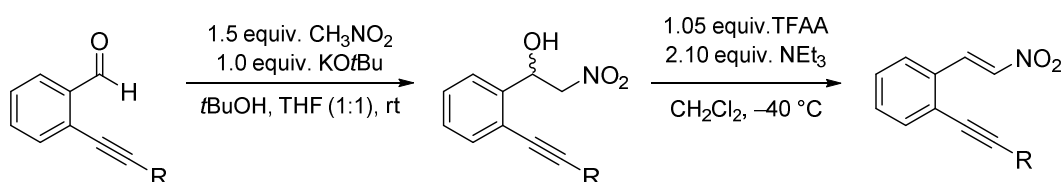

**Henry-reaction:** Under an atmosphere of argon, nitromethane (1.5 eq.) and *KOtBu* (1 eq.) were added to a solution of aldehyde (1 eq.) in a solution of THF and *tBuOH* (1:1, 0.5 M), and the mixture was stirred overnight. Then a solution of  $\text{NH}_4\text{Cl}$  was added, the product was extracted twice with  $\text{Et}_2\text{O}$ , the combined organic phases were washed with brine and dried over  $\text{MgSO}_4$ . The solvent was removed under reduced pressure and the crude product was subjected to flash chromatography on silica (*n*-pentane/ $\text{Et}_2\text{O}$  5:1 to 1:1).

**TFA-mediated dehydration:** Under an atmosphere of argon, TFAA (1.05 eq.) was added over a period of 30 min to a solution of nitroalcohol (1 eq.) in DCM (0.5 M) at  $-40\text{ }^\circ\text{C}$ . Then triethylamine (2.1 eq.) was added, and the mixture was stirred at  $-0\text{ }^\circ\text{C}$  for 45 min. The reaction was quenched with a solution of  $\text{NH}_4\text{Cl}$  was added, the liquid phases were separated, and the aqueous phase was extracted twice with DCM. The combined organic phases were washed with a saturated solution of  $\text{NaHCO}_3$  and brine, and dried over  $\text{Na}_2\text{SO}_4$ . The solvent was removed under reduced pressure and the product was purified by flash chromatography on silica (*n*-pentane/ $\text{Et}_2\text{O}$  5:1).

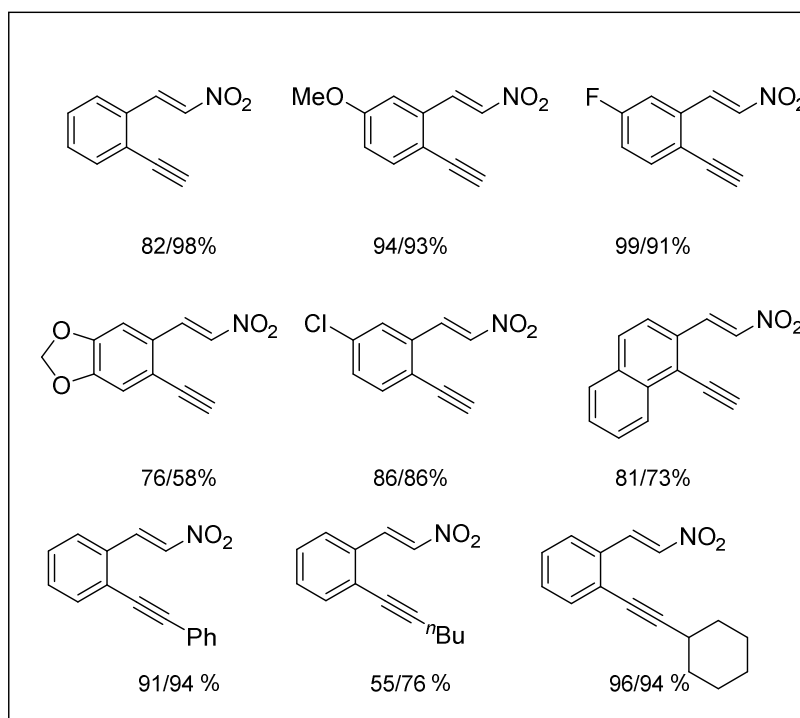

### 3.4 Asymmetric synthesis of spiropyrazolones

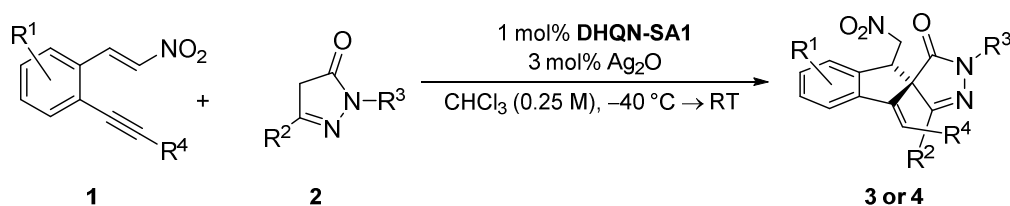

#### Method A: $R^4 = H$

A suspension of nitro olefine **1** (0.33 mmol, 1.1 equiv.), pyrazolone **2** (0.3 mmol, 1.0 equiv.), **DHQN-SA1** (1 mol%) and  $Ag_2O$  (3 mol%) in chloroform (1.2 mL) was stirred at  $-40^\circ C$  until complete conversion of the starting materials was observed as indicated by TLC. The reaction mixture was allowed to warm to room temperature and stirred for additional one to two hours, until the intermediate Michael-adduct was completely converted as indicated by TLC. The corresponding spiropyrazolone **3** was obtained after flash chromatography on silica with a mixture of *n*-pentane/ $Et_2O$  as eluent.

#### Method B: $R^4 = \text{Alkyl}$

A suspension of nitro olefine **1** (0.33 mmol, 1.1 equiv.), pyrazolone **2** (0.3 mmol, 1.0 equiv.), **DHQN-SA1** (1 mol%) and  $Ag_2O$  (10 mol%) in chloroform (1.2 mL) was stirred at  $-40^\circ C$  until complete conversion of the starting materials was observed as indicated by TLC. The reaction mixture was allowed to warm to room temperature and stirred for additional one to two hours, until the intermediate Michael-adduct was completely converted as indicated by TLC. The corresponding

spiropyrazolone **3** was obtained after flash chromatography on silica with a mixture of *n*-pentane/Et<sub>2</sub>O as eluent.

**Method C: R<sup>4</sup> = Ph**

A suspension of nitro olefine **1** (0.33 mmol, 1.1 equiv.), pyrazolone **2** (0.3 mmol, 1.0 equiv.), **DHQN-SA1** (3 mol%) in chloroform (1.2 mL) was stirred at room temperature until complete conversion of the starting materials was observed as indicated by TLC. The corresponding spiropyrazolone **4** was obtained after flash chromatography on silica with a mixture of *n*-pentane/Et<sub>2</sub>O as eluent

## 4.0 Experiments with deuterium-labeled substrates

For the experiments in which deuterated-substrates were applied, the following observations were made:

- The extent of deuteration decreases from 77% to 50%. This can be rationalized considering that there is an easy H/D-exchange by coordination of Ag(I) to the alkyne in basic media is available.

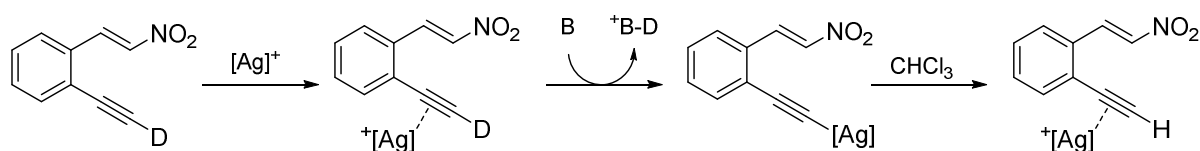

- For deuterated products, a strong bias towards the formation of the *anti*-product has been observed (85% *anti* vs. 15% *syn*).

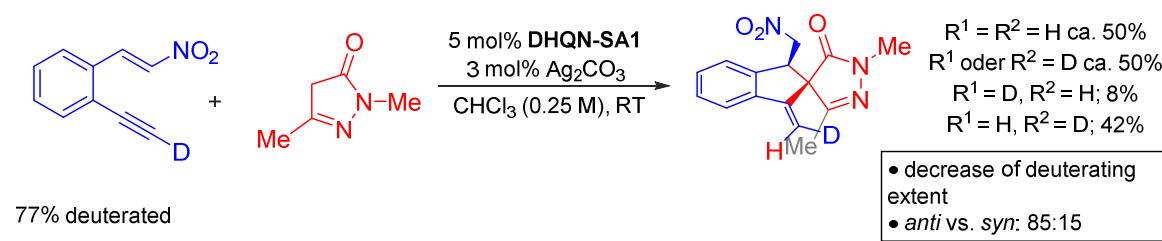

77% deuterated

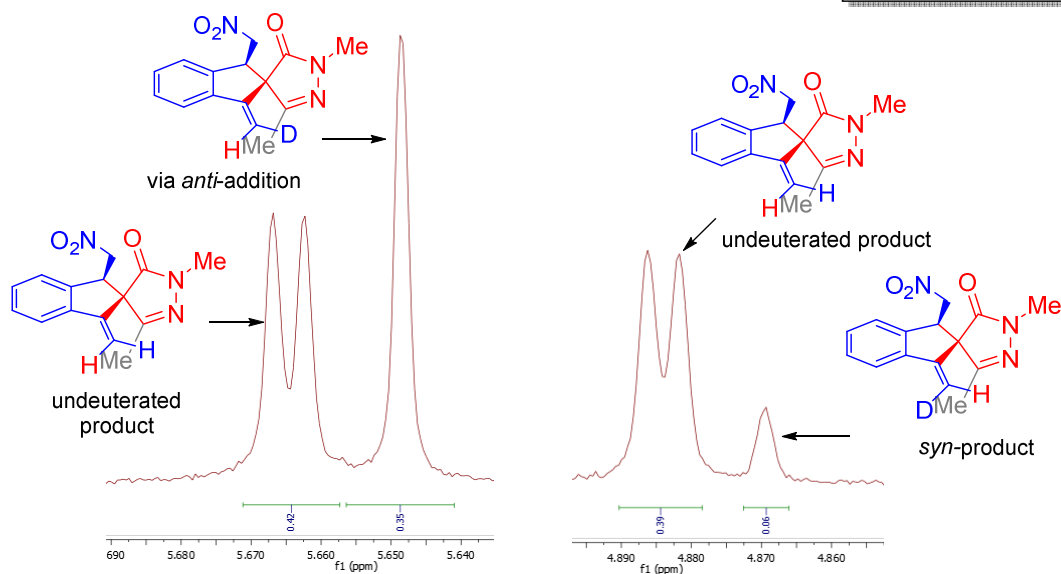

## 5.0 Computational details

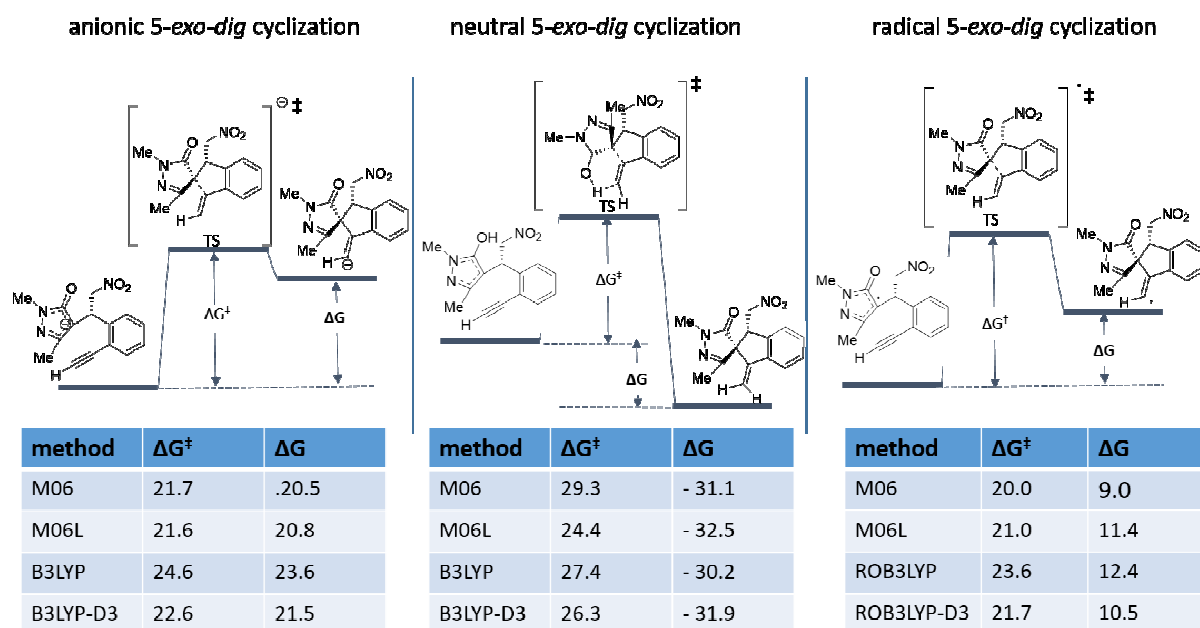

**Fig S1.** Energetic comparison of computed pathways considered for substrate **5a** depending on the method employed, in kcal/mol.

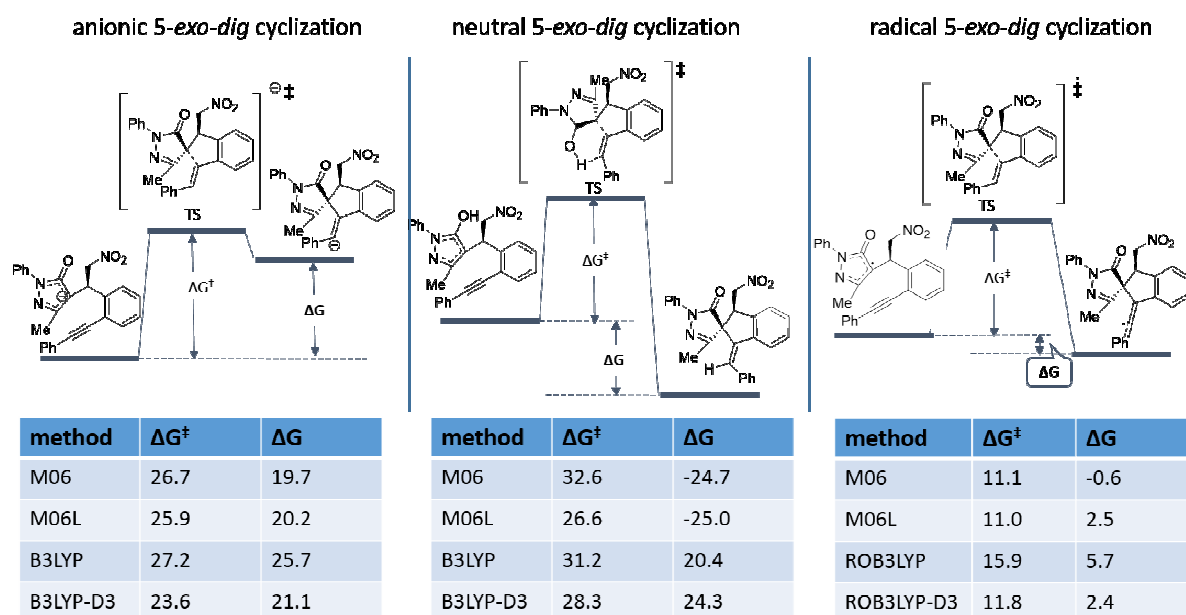

**Fig S2.** Energetic comparison of computed pathways for substrate **5b** depending on the method employed, in kcal/mol.



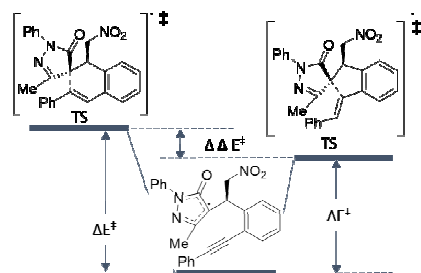

| method     | $\Delta\Delta E^\ddagger$ |
|------------|---------------------------|
| M06        | 13.9                      |
| M06L       | 14.6                      |
| ROB3LYP    | 16.5                      |
| ROB3LYP-D3 | 14.9                      |

**Fig S3.** 6-endo-dig vs 5-endo-dig selectivity for **5b** considering the radical pathway. Differences of activation barriers are shown depending on the method employed. Electronic energies in kcal/mol shown.

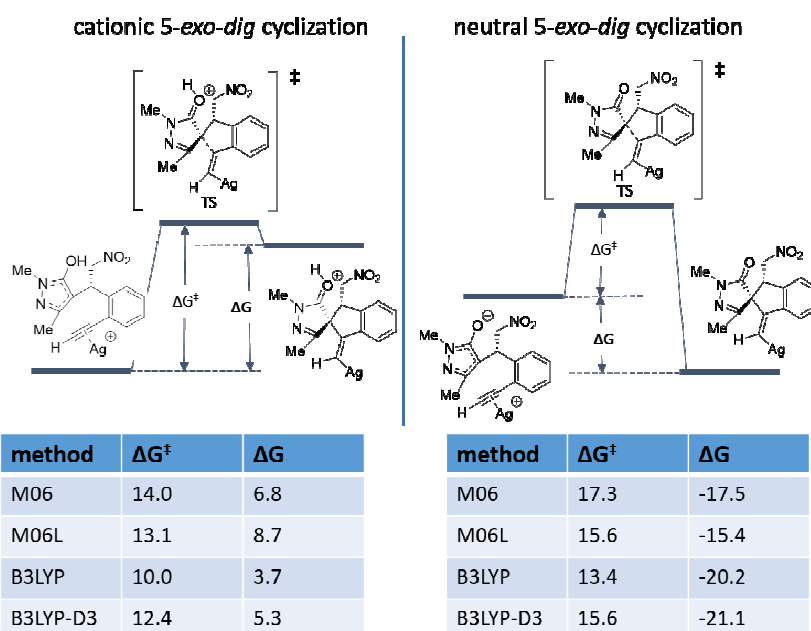

**Fig S4.** Energetic comparison of computed cationic pathways, in kcal/mol.

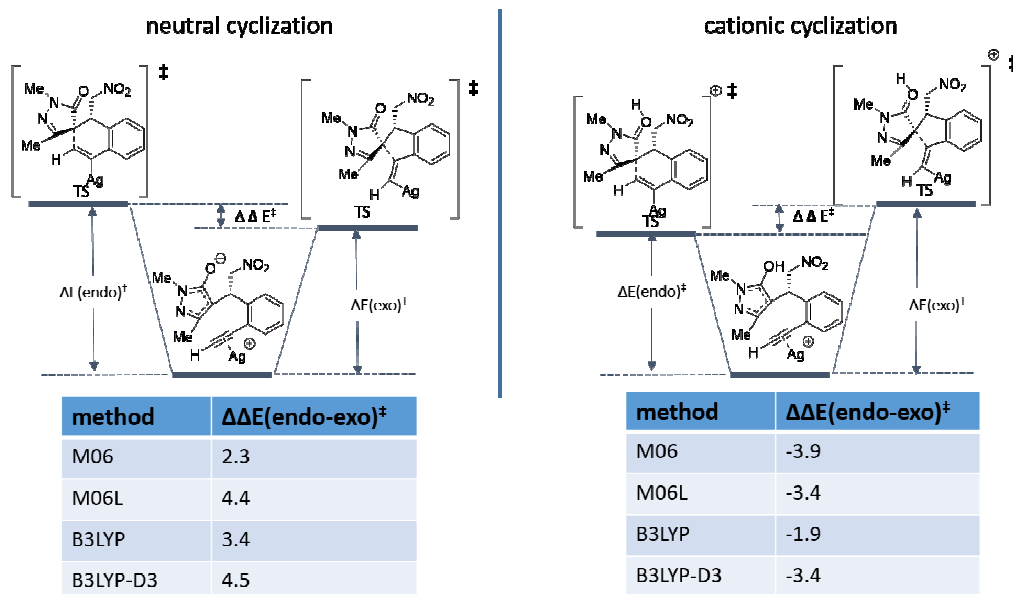

**Fig S5.** 6-endo-dig vs 5-endo-dig selectivity for **5a** considering both the neutral and the cationic system. Differences of activation barriers are shown depending on the method employed. Electronic energies in kcal/mol are shown.

*Full Gaussian Reference:*

Gaussian 09, Revision D.01, Frisch, M. J.; Trucks, G. W.; Schlegel, H. B.; Scuseria, G. E.; Robb, M. A.; Cheeseman, J. R.; Scalmani, G.; Barone, V.; Mennucci, B.; Petersson, G. A.; Nakatsuji, H.; Caricato, M.; Li, X.; Hratchian, H. P.; Izmaylov, A. F.; Bloino, J.; Zheng, G.; Sonnenberg, J. L.; Hada, M.; Ehara, M.; Toyota, K.; Fukuda, R.; Hasegawa, J.; Ishida, M.; Nakajima, T.; Honda, Y.; Kitao, O.; Nakai, H.; Vreven, T.; Montgomery, J. A., Jr.; Peralta, J. E.; Ogliaro, F.; Bearpark, M.; Heyd, J. J.; Brothers, E.; Kudin, K. N.; Staroverov, V. N.; Kobayashi, R.; Normand, J.; Raghavachari, K.; Rendell, A.; Burant, J. C.; Iyengar, S. S.; Tomasi, J.; Cossi, M.; Rega, N.; Millam, J. M.; Klene, M.; Knox, J. E.; Cross, J. B.; Bakken, V.; Adamo, C.; Jaramillo, J.; Gomperts, R.; Stratmann, R. E.; Yazyev, O.; Austin, A. J.; Cammi, R.; Pomelli, C.; Ochterski, J. W.; Martin, R. L.; Morokuma, K.; Zakrzewski, V. G.; Voth, G. A.; Salvador, P.; Dannenberg, J. J.; Dapprich, S.; Daniels, A. D.; Farkas, Ö.; Foresman, J. B.; Ortiz, J. V.; Cioslowski, J.; Fox, D. J. Gaussian, Inc., Wallingford CT, 2009.

General Information

All calculations were performed using Gaussian 09. Structural optimizations and frequency calculations were performed with the B3LYP functional along with the 6-31G(d) basis set and the LANL2DZ ECP on Ag atoms for closed shell molecules. For radicals, structural optimizations and frequency calculations were performed with the (RO)B3LYP functional along with the 6-31G(d) basis set. Single point energy calculations were done with the M06 functional and def2-TZVP basis set, unless otherwise stated. Solvent effects of dichloromethane were included in the single point calculations using the CPCM solvation model.

[(enolate-5a)]

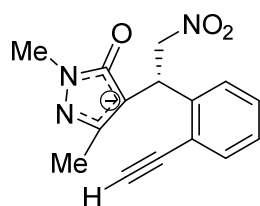

|   |              |              |              |
|---|--------------|--------------|--------------|
| O | 1.985129000  | -2.308102000 | 2.125378000  |
| O | 2.289237000  | -0.201643000 | 2.600954000  |
| O | -2.040359000 | 1.323826000  | 1.516459000  |
| N | -3.439652000 | 0.318516000  | -0.086626000 |
| N | -3.397635000 | -0.621140000 | -1.098483000 |
| N | 1.594275000  | -1.139010000 | 2.205101000  |
| C | -2.130740000 | -1.034675000 | -1.101849000 |
| C | -2.216796000 | 0.514163000  | 0.555966000  |
| C | 2.651409000  | 2.678670000  | -1.117318000 |
| C | 2.126011000  | 0.303102000  | -1.111212000 |
| C | 2.463480000  | -1.006677000 | -1.583270000 |
| C | 0.756411000  | 1.852977000  | 0.147345000  |
| C | 2.927445000  | 1.384866000  | -1.536323000 |
| C | 1.559349000  | 2.909110000  | -0.273111000 |
| C | 1.023481000  | 0.533910000  | -0.253553000 |
| C | 0.112024000  | -0.603722000 | 0.207024000  |
| C | 0.201139000  | -0.843484000 | 1.744393000  |
| C | -1.707369000 | -2.084783000 | -2.088499000 |
| C | 2.782495000  | -2.091908000 | -2.017265000 |
| C | -1.339555000 | -0.385142000 | -0.124745000 |
| C | -4.656448000 | 0.999889000  | 0.240791000  |
| H | -0.156799000 | 0.034672000  | 2.281822000  |
| H | -0.112546000 | 2.028592000  | 0.780703000  |
| H | 1.329188000  | 3.920452000  | 0.055006000  |
| H | -2.562048000 | -2.358397000 | -2.716255000 |
| H | -5.441468000 | 0.299923000  | 0.563400000  |
| H | -0.387748000 | -1.725249000 | 1.994273000  |
| H | -5.043714000 | 1.572748000  | -0.614489000 |
| H | 3.047416000  | -3.064095000 | -2.362746000 |
| H | -0.894834000 | -1.736886000 | -2.740897000 |
| H | 3.765504000  | 1.183691000  | -2.198108000 |
| H | 3.278831000  | 3.503242000  | -1.448610000 |
| H | -1.342917000 | -2.996210000 | -1.592369000 |
| H | -4.418930000 | 1.683470000  | 1.060860000  |
| H | 0.455075000  | -1.524934000 | -0.275093000 |

|                                              |                             |
|----------------------------------------------|-----------------------------|
| Zero-point correction=                       | 0.267962 (Hartree/Particle) |
| Thermal correction to Energy=                | 0.287819                    |
| Thermal correction to Enthalpy=              | 0.288763                    |
| Thermal correction to Gibbs Free Energy=     | 0.217887                    |
| Sum of electronic and zero-point Energies=   | -969.566331                 |
| Sum of electronic and thermal Energies=      | -969.546474                 |
| Sum of electronic and thermal Enthalpies=    | -969.545530                 |
| Sum of electronic and thermal Free Energies= | -969.616406                 |

CPCM (dichloromethane) M06/def2TZVP E = -969.6383318

CPCM (dichloromethane) M06L/def2TZVP E = -970.1577064

CPCM (dichloromethane) B3LYP/def2TZVP E = - 970.2932131  
 CPCM (dichloromethane) B3LYP-d3/def2TZVP E = - 970.3308715

**[(anionic-TS-6a)]**

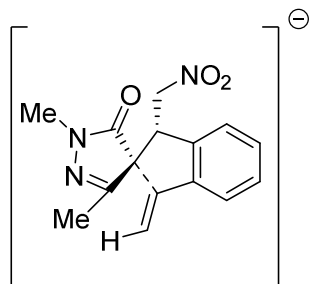

|   |              |              |              |
|---|--------------|--------------|--------------|
| O | 2.625473000  | 2.995202000  | -0.846074000 |
| O | 1.966281000  | 2.866925000  | 1.222893000  |
| O | -2.003112000 | 1.522077000  | -1.468202000 |
| N | -3.218960000 | 0.211679000  | 0.007675000  |
| N | -3.013052000 | -0.611094000 | 1.118926000  |
| N | 1.840957000  | 2.617959000  | 0.021371000  |
| C | -1.720286000 | -0.709671000 | 1.251557000  |
| C | -2.054317000 | 0.689985000  | -0.552337000 |
| C | 3.150955000  | -2.504113000 | -0.536317000 |
| C | 0.945073000  | -1.507521000 | -0.554654000 |
| C | -0.482031000 | -1.452827000 | -0.876757000 |
| C | 2.771030000  | -0.420333000 | 0.637208000  |
| C | 1.819731000  | -2.536568000 | -0.942936000 |
| C | 3.632432000  | -1.454718000 | 0.259501000  |
| C | 1.439175000  | -0.449184000 | 0.221874000  |
| C | 0.376710000  | 0.612781000  | 0.468691000  |
| C | 0.621733000  | 1.849686000  | -0.419972000 |
| C | -1.132891000 | -1.527271000 | 2.357024000  |
| C | -1.196405000 | -2.260288000 | -1.630989000 |
| C | -0.974157000 | -0.060920000 | 0.152666000  |
| C | -4.550086000 | 0.593019000  | -0.371905000 |
| H | 0.786872000  | 1.594461000  | -1.463886000 |
| H | 3.137070000  | 0.399857000  | 1.251396000  |
| H | 4.671369000  | -1.443115000 | 0.582382000  |
| H | -1.933294000 | -1.909457000 | 2.998003000  |
| H | -4.455064000 | 1.249809000  | -1.239906000 |
| H | -0.204858000 | 2.560464000  | -0.360166000 |
| H | 0.399274000  | 0.966634000  | 1.506186000  |
| H | -5.061447000 | 1.129822000  | 0.439369000  |
| H | -2.277733000 | -2.075586000 | -1.700431000 |
| H | -0.564727000 | -2.372889000 | 1.951589000  |
| H | 1.416289000  | -3.342380000 | -1.549828000 |
| H | 3.823630000  | -3.308639000 | -0.830418000 |
| H | -0.439954000 | -0.938349000 | 2.973198000  |
| H | -5.149162000 | -0.286417000 | -0.638150000 |

Zero-point correction= 0.267224 (Hartree/Particle)  
 Thermal correction to Energy= 0.285787  
 Thermal correction to Enthalpy= 0.286731  
 Thermal correction to Gibbs Free Energy= 0.219464

Sum of electronic and zero-point Energies= -969.531629  
 Sum of electronic and thermal Energies= -969.513066  
 Sum of electronic and thermal Enthalpies= -969.512122  
 Sum of electronic and thermal Free Energies= -969.579388

CPCM (dichloromethane) M06/def2TZVP E = - 969.6052519  
 CPCM (dichloromethane) M06L/def2TZVP E = - 970.1247759  
 CPCM (dichloromethane) B3LYP/def2TZVP E = - 970.2556207  
 CPCM (dichloromethane) B3LYP-d3/def2TZVP E = - 970.2965116

*[(anion-7a)]*

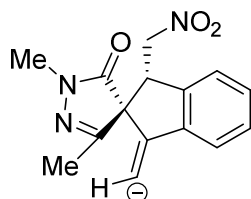

|   |              |              |              |
|---|--------------|--------------|--------------|
| O | 2.587131000  | 3.024401000  | -0.829206000 |
| O | 1.905005000  | 2.885995000  | 1.231836000  |
| O | -2.037373000 | 1.494414000  | -1.467451000 |
| N | -3.221700000 | 0.194297000  | 0.037803000  |
| N | -2.991271000 | -0.645976000 | 1.132800000  |
| N | 1.798208000  | 2.635560000  | 0.028881000  |
| C | -1.699536000 | -0.765634000 | 1.226970000  |
| C | -2.071233000 | 0.659762000  | -0.556376000 |
| C | 3.180502000  | -2.462836000 | -0.526081000 |
| C | 0.969191000  | -1.484069000 | -0.565280000 |
| C | -0.457083000 | -1.415539000 | -0.900047000 |
| C | 2.768792000  | -0.395362000 | 0.668041000  |
| C | 1.855972000  | -2.501274000 | -0.954501000 |
| C | 3.642751000  | -1.419862000 | 0.290106000  |
| C | 1.444164000  | -0.432382000 | 0.232691000  |
| C | 0.359894000  | 0.610907000  | 0.462209000  |
| C | 0.595994000  | 1.849116000  | -0.426341000 |
| C | -1.093202000 | -1.606101000 | 2.304265000  |
| C | -1.137769000 | -2.224201000 | -1.701585000 |
| C | -0.967284000 | -0.107633000 | 0.111944000  |
| C | -4.561227000 | 0.583952000  | -0.302803000 |
| H | 0.778314000  | 1.592444000  | -1.467222000 |
| H | 3.120225000  | 0.421277000  | 1.295576000  |
| H | 4.676885000  | -1.405260000 | 0.628017000  |
| H | -1.881347000 | -1.991858000 | 2.958114000  |
| H | -4.487528000 | 1.247173000  | -1.167888000 |
| H | -0.240768000 | 2.548920000  | -0.378628000 |
| H | 0.348453000  | 0.966839000  | 1.498772000  |
| H | -5.047584000 | 1.115892000  | 0.526553000  |
| H | -2.219819000 | -2.021596000 | -1.773686000 |
| H | -0.542851000 | -2.448601000 | 1.869542000  |
| H | 1.466847000  | -3.300745000 | -1.579106000 |
| H | 3.864546000  | -3.258191000 | -0.819379000 |
| H | -0.379563000 | -1.033619000 | 2.911825000  |
| H | -5.170134000 | -0.291397000 | -0.559592000 |

Zero-point correction= 0.267728 (Hartree/Particle)

Thermal correction to Energy= 0.286806  
 Thermal correction to Enthalpy= 0.287750  
 Thermal correction to Gibbs Free Energy= 0.219355  
 Sum of electronic and zero-point Energies= -969.531156  
 Sum of electronic and thermal Energies= -969.512078  
 Sum of electronic and thermal Enthalpies= -969.511134  
 Sum of electronic and thermal Free Energies= -969.579529

CPCM (dichloromethane) M06/def2TZVP E = - 969.6070768  
 CPCM (dichloromethane) M06L/def2TZVP E = - 970.1260091  
 CPCM (dichloromethane) B3LYP/def2TZVP E = - 970.2570907  
 CPCM (dichloromethane) B3LYP-d3/def2TZVP E = - 970.2980678

**[(enolate-5b)]**

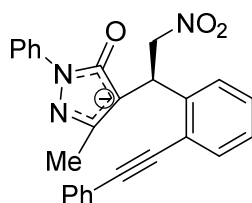

|   |              |              |              |
|---|--------------|--------------|--------------|
| C | -1.938868000 | 2.973366000  | -1.792653000 |
| C | -6.844423000 | -2.607735000 | 0.143413000  |
| C | -3.703836000 | 0.108693000  | -0.701066000 |
| C | -4.812793000 | -1.470935000 | 0.814169000  |
| C | -4.763477000 | -0.803759000 | -0.428296000 |
| C | -0.952920000 | 3.940145000  | -1.930302000 |
| C | -0.455172000 | 1.626251000  | -0.383560000 |
| C | -1.710918000 | 1.818228000  | -1.013083000 |
| C | 1.153600000  | -0.305832000 | 0.014759000  |
| C | 2.450243000  | 0.127633000  | 0.403339000  |
| C | 0.523546000  | 2.619224000  | -0.534798000 |
| C | -2.776124000 | 0.880934000  | -0.856710000 |
| C | 5.376733000  | -1.975904000 | -0.761236000 |
| C | -0.110949000 | 0.597124000  | 1.942681000  |
| C | -0.143687000 | 0.352260000  | 0.404749000  |
| C | 0.278680000  | 3.763025000  | -1.290745000 |
| C | -6.805515000 | -1.948882000 | -1.087965000 |
| C | -5.845118000 | -2.363504000 | 1.089837000  |
| C | 4.708400000  | -0.918217000 | -0.111637000 |
| C | -5.776505000 | -1.055193000 | -1.374997000 |
| C | 5.471236000  | 0.040419000  | 0.586925000  |
| C | 7.524034000  | -1.119353000 | -0.018922000 |
| C | 6.859815000  | -0.071768000 | 0.624021000  |
| C | 6.764732000  | -2.067350000 | -0.710220000 |
| O | 2.823638000  | 1.119333000  | 1.089604000  |
| O | -2.252212000 | 0.205051000  | 2.802198000  |
| O | -1.643317000 | 2.278475000  | 2.511113000  |
| N | -1.431020000 | 1.067714000  | 2.468879000  |
| N | 3.314731000  | -0.843203000 | -0.174075000 |
| N | 2.616138000  | -1.821179000 | -0.877087000 |
| C | 0.290532000  | -2.340478000 | -1.390200000 |
| C | 1.340274000  | -1.482621000 | -0.745613000 |
| H | 0.090364000  | -0.346998000 | 2.446726000  |
| H | -2.905267000 | 3.094897000  | -2.274026000 |

|   |              |              |              |
|---|--------------|--------------|--------------|
| H | 1.485334000  | 2.471367000  | -0.048256000 |
| H | -0.957821000 | -0.357490000 | 0.223524000  |
| H | 4.949206000  | 0.848645000  | 1.082247000  |
| H | -5.871065000 | -2.869812000 | 2.051648000  |
| H | 0.641321000  | 1.343471000  | 2.194351000  |
| H | -1.142108000 | 4.828183000  | -2.528972000 |
| H | -7.648148000 | -3.305882000 | 0.364256000  |
| H | 1.056629000  | 4.516657000  | -1.388878000 |
| H | -4.039658000 | -1.265182000 | 1.548330000  |
| H | -5.741850000 | -0.543823000 | -2.332539000 |
| H | 4.781734000  | -2.706432000 | -1.294815000 |
| H | 8.608570000  | -1.195771000 | 0.017621000  |
| H | 7.430747000  | 0.678546000  | 1.168733000  |
| H | -7.579461000 | -2.133556000 | -1.829334000 |
| H | 0.770329000  | -3.175534000 | -1.910113000 |
| H | -0.411711000 | -2.752471000 | -0.652391000 |
| H | -0.308523000 | -1.776126000 | -2.117112000 |
| H | 7.258440000  | -2.893521000 | -1.219678000 |

Zero-point correction= 0.402954 (Hartree/Particle)  
 Thermal correction to Energy= 0.430380  
 Thermal correction to Enthalpy= 0.431324  
 Thermal correction to Gibbs Free Energy= 0.340217  
 Sum of electronic and zero-point Energies= -1392.252812  
 Sum of electronic and thermal Energies= -1392.225385  
 Sum of electronic and thermal Enthalpies= -1392.224441  
 Sum of electronic and thermal Free Energies= -1392.315549

CPCM (dichloromethane) M06/def2TZVP E = - 1392.2602756  
 CPCM (dichloromethane) M06L/def2TZVP E = - 1393.0579796  
 CPCM (dichloromethane) B3LYP/def2TZVP E = - 1393.2533908  
 CPCM (dichloromethane) B3LYP-d3/def2TZVP E = - 1393.3080145

**[(anionic-TS-6b)]**

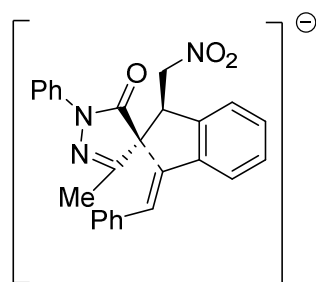

|   |              |              |              |
|---|--------------|--------------|--------------|
| C | 2.481275000  | 2.537305000  | -1.793196000 |
| C | -4.363751000 | 3.235186000  | 0.582426000  |
| C | -0.306561000 | 2.344331000  | -0.412779000 |
| C | -2.736244000 | 2.166403000  | -0.874680000 |
| C | -1.649874000 | 2.585613000  | -0.051375000 |
| C | 3.798952000  | 2.501267000  | -2.244114000 |
| C | 2.921188000  | 0.595230000  | -0.413374000 |
| C | 2.033855000  | 1.574490000  | -0.878709000 |
| C | 0.745089000  | -0.092092000 | 0.483410000  |
| C | 0.030240000  | -1.032834000 | -0.430810000 |
| C | 4.241432000  | 0.559912000  | -0.863014000 |

|   |              |              |              |
|---|--------------|--------------|--------------|
| C | 0.675400000  | 1.501766000  | -0.327113000 |
| C | -3.464132000 | -2.085266000 | 0.531682000  |
| C | 2.652231000  | -1.784026000 | 0.564026000  |
| C | 2.264749000  | -0.294591000 | 0.629657000  |
| C | 4.679504000  | 1.513823000  | -1.786655000 |
| C | -3.312357000 | 3.668560000  | 1.398662000  |
| C | -4.050767000 | 2.481481000  | -0.556343000 |
| C | -2.306872000 | -2.004322000 | -0.263253000 |
| C | -1.991344000 | 3.363719000  | 1.093651000  |
| C | -2.276823000 | -2.664343000 | -1.505873000 |
| C | -4.537444000 | -3.480831000 | -1.138285000 |
| C | -3.389044000 | -3.391541000 | -1.926924000 |
| C | -4.562168000 | -2.819316000 | 0.091620000  |
| O | 0.409576000  | -1.517558000 | -1.498339000 |
| O | 4.859980000  | -2.603855000 | 0.484582000  |
| O | 4.174281000  | -1.703203000 | 2.345451000  |
| N | 4.007769000  | -2.046037000 | 1.175377000  |
| N | -1.203796000 | -1.265563000 | 0.196410000  |
| N | -1.249520000 | -0.710713000 | 1.482468000  |
| C | 0.154929000  | 0.600974000  | 2.965556000  |
| C | -0.118602000 | -0.100465000 | 1.673916000  |
| H | 1.967776000  | -2.377720000 | 1.175801000  |
| H | 1.777402000  | 3.291142000  | -2.134296000 |
| H | 4.931547000  | -0.204446000 | -0.516279000 |
| H | 2.554455000  | 0.052262000  | 1.631108000  |
| H | -1.385759000 | -2.596420000 | -2.114748000 |
| H | -4.849681000 | 2.126693000  | -1.206413000 |
| H | 2.680358000  | -2.166835000 | -0.453011000 |
| H | 4.143955000  | 3.242537000  | -2.962585000 |
| H | -5.395508000 | 3.478992000  | 0.824155000  |
| H | 5.705097000  | 1.484823000  | -2.147744000 |
| H | -2.517779000 | 1.578236000  | -1.762113000 |
| H | -1.189972000 | 3.723550000  | 1.735085000  |
| H | -3.482670000 | -1.562217000 | 1.479025000  |
| H | -5.398840000 | -4.051372000 | -1.477198000 |
| H | -3.350348000 | -3.896003000 | -2.890223000 |
| H | -3.526521000 | 4.257199000  | 2.290517000  |
| H | -0.708444000 | 0.504945000  | 3.629391000  |
| H | 1.037341000  | 0.187869000  | 3.473022000  |
| H | 0.348218000  | 1.664977000  | 2.785406000  |
| H | -5.449674000 | -2.867694000 | 0.719114000  |

|                                              |                             |
|----------------------------------------------|-----------------------------|
| Zero-point correction=                       | 0.401037 (Hartree/Particle) |
| Thermal correction to Energy=                | 0.427458                    |
| Thermal correction to Enthalpy=              | 0.428403                    |
| Thermal correction to Gibbs Free Energy=     | 0.341052                    |
| Sum of electronic and zero-point Energies=   | -1392.216274                |
| Sum of electronic and thermal Energies=      | -1392.189853                |
| Sum of electronic and thermal Enthalpies=    | -1392.188909                |
| Sum of electronic and thermal Free Energies= | -1392.276259                |

CPCM (dichloromethane) M06/def2TZVP E = - 1392.2254648  
 CPCM (dichloromethane) M06L/def2TZVP E = - 1393.0223965  
 CPCM (dichloromethane) B3LYP/def2TZVP E = - 1393.210949  
 CPCM (dichloromethane) B3LYP-d3/def2TZVP E = - 1393.2712965



[(anion-7b)]

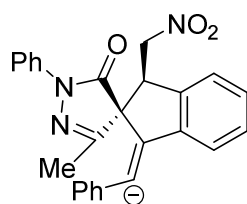

|   |              |              |              |
|---|--------------|--------------|--------------|
| C | 3.244606000  | 2.405940000  | -1.379213000 |
| C | -3.689416000 | 3.529906000  | 0.593674000  |
| C | 0.356262000  | 2.465700000  | -0.311214000 |
| C | -2.063110000 | 2.487917000  | -0.884857000 |
| C | -0.991611000 | 2.756234000  | 0.017938000  |
| C | 4.589474000  | 2.241352000  | -1.702373000 |
| C | 3.267447000  | 0.248553000  | -0.283916000 |
| C | 2.574824000  | 1.401470000  | -0.667142000 |
| C | 0.930007000  | -0.111421000 | 0.390048000  |
| C | 0.039561000  | -0.843582000 | -0.584491000 |
| C | 4.617512000  | 0.088877000  | -0.592962000 |
| C | 1.174112000  | 1.437820000  | -0.224242000 |
| C | -3.554935000 | -1.407523000 | 0.382691000  |
| C | 2.562742000  | -2.133357000 | 0.117860000  |
| C | 2.376591000  | -0.677237000 | 0.536289000  |
| C | 5.282086000  | 1.087534000  | -1.311787000 |
| C | -2.652057000 | 3.818101000  | 1.488852000  |
| C | -3.369395000 | 2.861601000  | -0.595139000 |
| C | -2.408531000 | -1.466349000 | -0.428581000 |
| C | -1.339875000 | 3.454325000  | 1.212136000  |
| C | -2.500377000 | -2.031117000 | -1.713652000 |
| C | -4.863674000 | -2.476284000 | -1.358554000 |
| C | -3.723682000 | -2.526821000 | -2.162178000 |
| C | -4.765517000 | -1.910992000 | -0.085251000 |
| O | 0.316069000  | -1.262248000 | -1.709255000 |
| O | 1.685684000  | -2.770343000 | 2.230387000  |
| O | 2.147023000  | -4.327978000 | 0.782114000  |
| N | 2.079362000  | -3.150706000 | 1.130288000  |
| N | -1.191372000 | -0.958991000 | 0.061360000  |
| N | -1.135175000 | -0.504283000 | 1.388422000  |
| C | 0.458453000  | 0.463040000  | 2.936013000  |
| C | 0.066558000  | -0.078272000 | 1.600771000  |
| H | 2.038285000  | -2.366475000 | -0.810646000 |
| H | 2.685717000  | 3.295082000  | -1.657852000 |
| H | 5.165059000  | -0.797886000 | -0.276077000 |
| H | 2.665569000  | -0.601005000 | 1.592279000  |
| H | -1.617728000 | -2.070547000 | -2.336794000 |
| H | -4.157021000 | 2.619097000  | -1.307791000 |
| H | 3.617794000  | -2.389337000 | -0.012282000 |
| H | 5.108557000  | 3.016363000  | -2.263546000 |
| H | -4.714260000 | 3.819856000  | 0.813342000  |
| H | 6.333311000  | 0.967267000  | -1.564267000 |
| H | -1.841097000 | 1.968442000  | -1.813704000 |
| H | -0.549044000 | 3.705104000  | 1.915963000  |
| H | -3.476672000 | -0.959554000 | 1.364596000  |
| H | -5.812549000 | -2.866289000 | -1.718980000 |

|   |              |              |              |
|---|--------------|--------------|--------------|
| H | -3.779169000 | -2.959859000 | -3.158754000 |
| H | -2.870832000 | 4.338769000  | 2.421280000  |
| H | -0.416389000 | 0.504224000  | 3.590132000  |
| H | 1.220406000  | -0.170975000 | 3.407432000  |
| H | 0.874736000  | 1.471149000  | 2.829556000  |
| H | -5.642927000 | -1.853504000 | 0.555327000  |

|                                              |                             |
|----------------------------------------------|-----------------------------|
| Zero-point correction=                       | 0.401670 (Hartree/Particle) |
| Thermal correction to Energy=                | 0.428400                    |
| Thermal correction to Enthalpy=              | 0.429344                    |
| Thermal correction to Gibbs Free Energy=     | 0.340686                    |
| Sum of electronic and zero-point Energies=   | -1392.214854                |
| Sum of electronic and thermal Energies=      | -1392.188125                |
| Sum of electronic and thermal Enthalpies=    | -1392.187181                |
| Sum of electronic and thermal Free Energies= | -1392.275839                |

CPCM (dichloromethane) M06/def2TZVP E = - 1392.229994  
 CPCM (dichloromethane) M06L/def2TZVP E = - 1393.0266945  
 CPCM (dichloromethane) B3LYP/def2TZVP E = - 1393.2128538  
 CPCM (dichloromethane) B3LYP-d3/def2TZVP E = - 1393.27487

**[(neutral-5a)]**

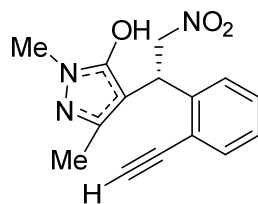

|   |              |              |              |
|---|--------------|--------------|--------------|
| O | 1.828694000  | 3.604109000  | 0.236566000  |
| O | 1.756140000  | 2.262370000  | -1.470488000 |
| O | 2.353525000  | -0.537394000 | -1.549688000 |
| N | 2.515350000  | -1.538333000 | 0.561456000  |
| N | 1.868610000  | -1.610969000 | 1.759495000  |
| N | 1.306086000  | 2.710610000  | -0.409720000 |
| C | 0.812120000  | -0.808667000 | 1.641447000  |
| C | 1.870381000  | -0.720045000 | -0.300621000 |
| C | -4.395154000 | -0.516305000 | 0.245659000  |
| C | -2.258922000 | -0.717196000 | -0.901522000 |
| C | -1.473483000 | -1.344004000 | -1.918850000 |
| C | -2.537985000 | 0.894454000  | 0.877782000  |
| C | -3.595114000 | -1.116338000 | -0.722615000 |
| C | -3.865394000 | 0.493652000  | 1.047044000  |
| C | -1.712639000 | 0.305612000  | -0.084128000 |
| C | -0.256827000 | 0.721472000  | -0.293045000 |
| C | -0.022435000 | 2.186476000  | 0.099112000  |
| C | -0.107145000 | -0.651813000 | 2.816305000  |
| C | -0.812426000 | -1.864904000 | -2.788371000 |
| C | 0.747219000  | -0.213911000 | 0.346001000  |
| C | 3.709108000  | -2.320208000 | 0.318672000  |
| H | -0.764405000 | 2.856387000  | -0.349890000 |
| H | -2.145745000 | 1.677094000  | 1.520425000  |
| H | -4.478982000 | 0.971129000  | 1.805864000  |

|   |              |              |              |
|---|--------------|--------------|--------------|
| H | 0.272814000  | -1.254377000 | 3.645742000  |
| H | 4.215194000  | -1.917663000 | -0.560290000 |
| H | 0.013739000  | 2.361469000  | 1.173587000  |
| H | 3.460226000  | -3.372842000 | 0.143653000  |
| H | -0.217085000 | -2.331396000 | -3.540161000 |
| H | -0.169068000 | 0.390572000  | 3.155252000  |
| H | -3.994596000 | -1.899508000 | -1.359276000 |
| H | -5.426024000 | -0.834763000 | 0.371021000  |
| H | -1.126982000 | -0.978911000 | 2.586192000  |
| H | 4.362271000  | -2.248462000 | 1.191260000  |
| H | 2.140115000  | 0.377814000  | -1.816597000 |
| H | -0.086491000 | 0.671996000  | -1.373727000 |

Zero-point correction= 0.281681 (Hartree/Particle)  
 Thermal correction to Energy= 0.301718  
 Thermal correction to Enthalpy= 0.302662  
 Thermal correction to Gibbs Free Energy= 0.231813  
 Sum of electronic and zero-point Energies= -970.090453  
 Sum of electronic and thermal Energies= -970.070416  
 Sum of electronic and thermal Enthalpies= -970.069471  
 Sum of electronic and thermal Free Energies= -970.140321

CPCM (dichloromethane) M06/def2TZVP E = - 970.1112072  
 CPCM (dichloromethane) M06L/def2TZVP E = - 970.6334545  
 CPCM (dichloromethane) B3LYP/def2TZVP E = - 970.766019  
 CPCM (dichloromethane) B3LYP-d3/def2TZVP E = - 970.8058737

**[(neutral-TS-6a)]**

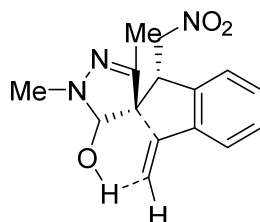

|   |              |              |              |
|---|--------------|--------------|--------------|
| O | 1.628710000  | 2.578335000  | -1.324144000 |
| O | 1.625438000  | 3.685604000  | 0.554606000  |
| O | 2.154922000  | 0.076113000  | 1.462844000  |
| N | 2.417834000  | -1.599932000 | -0.142252000 |
| N | 1.781273000  | -2.113191000 | -1.227225000 |
| N | 1.193373000  | 2.826600000  | -0.204382000 |
| C | 0.706806000  | -1.363222000 | -1.410103000 |
| C | 1.791075000  | -0.484269000 | 0.357644000  |
| C | -4.263669000 | -0.734528000 | 0.469205000  |
| C | -1.880508000 | -0.562710000 | 0.860353000  |
| C | -0.719411000 | -0.810572000 | 1.663241000  |
| C | -2.902928000 | 0.692968000  | -0.935991000 |
| C | -3.133540000 | -1.096865000 | 1.202417000  |
| C | -4.151290000 | 0.162077000  | -0.593691000 |
| C | -1.762300000 | 0.334454000  | -0.223042000 |
| C | -0.357506000 | 0.834903000  | -0.563045000 |
| C | -0.016221000 | 2.060051000  | 0.294854000  |

|   |              |              |              |
|---|--------------|--------------|--------------|
| C | -0.216803000 | -1.639269000 | -2.556295000 |
| C | 0.081597000  | -0.816407000 | 2.640224000  |
| C | 0.618837000  | -0.311648000 | -0.435750000 |
| C | 3.633071000  | -2.202925000 | 0.359868000  |
| H | -0.827852000 | 2.792772000  | 0.276898000  |
| H | -2.815811000 | 1.373734000  | -1.779400000 |
| H | -5.030551000 | 0.437298000  | -1.169093000 |
| H | 0.156546000  | -2.495778000 | -3.123643000 |
| H | 4.399778000  | -2.216313000 | -0.420785000 |
| H | 0.216062000  | 1.815438000  | 1.329456000  |
| H | -0.363034000 | 1.174609000  | -1.605408000 |
| H | 3.442680000  | -3.228884000 | 0.690955000  |
| H | -0.021482000 | -0.938430000 | 3.712301000  |
| H | -1.235147000 | -1.862707000 | -2.216355000 |
| H | -3.214303000 | -1.785550000 | 2.037468000  |
| H | -5.229814000 | -1.158240000 | 0.727483000  |
| H | -0.283127000 | -0.780645000 | -3.237545000 |
| H | 3.974994000  | -1.601100000 | 1.203060000  |
| H | 1.247884000  | -0.413188000 | 2.265831000  |

|                                              |                             |
|----------------------------------------------|-----------------------------|
| Zero-point correction=                       | 0.276078 (Hartree/Particle) |
| Thermal correction to Energy=                | 0.295043                    |
| Thermal correction to Enthalpy=              | 0.295987                    |
| Thermal correction to Gibbs Free Energy=     | 0.227990                    |
| Sum of electronic and zero-point Energies=   | -970.053019                 |
| Sum of electronic and thermal Energies=      | -970.034055                 |
| Sum of electronic and thermal Enthalpies=    | -970.033111                 |
| Sum of electronic and thermal Free Energies= | -970.101108                 |

CPCM (dichloromethane) M06/def2TZVP E = - 970.0596956  
 CPCM (dichloromethane) M06L/def2TZVP E = - 970.5907334  
 CPCM (dichloromethane) B3LYP/def2TZVP E = - 970.7185919  
 CPCM (dichloromethane) B3LYP-d3/def2TZVP E = - 970.76015

[(3h)]

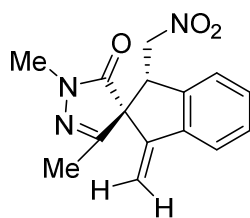

|   |              |              |              |
|---|--------------|--------------|--------------|
| O | -1.761033000 | 3.632201000  | -0.351950000 |
| O | -2.118767000 | 1.862007000  | 0.870192000  |
| O | -1.671208000 | 0.095124000  | -1.912308000 |
| N | -2.543237000 | -1.166606000 | -0.177451000 |
| N | -2.146823000 | -1.653076000 | 1.069743000  |
| N | -1.439845000 | 2.541416000  | 0.101156000  |
| C | -0.910507000 | -1.341319000 | 1.246391000  |
| C | -1.565183000 | -0.469712000 | -0.832579000 |
| C | 4.434836000  | -0.248590000 | -0.393107000 |
| C | 2.068111000  | -0.692908000 | -0.396596000 |
| C | 0.800919000  | -1.404070000 | -0.611786000 |
| C | 2.904869000  | 1.374276000  | 0.564902000  |

|   |              |              |              |
|---|--------------|--------------|--------------|
| C | 3.372288000  | -1.089399000 | -0.716746000 |
| C | 4.205043000  | 0.975987000  | 0.247693000  |
| C | 1.840455000  | 0.535481000  | 0.236786000  |
| C | 0.359016000  | 0.782548000  | 0.467620000  |
| C | -0.095247000 | 2.005758000  | -0.335144000 |
| C | -0.167250000 | -1.747016000 | 2.475878000  |
| C | 0.615527000  | -2.567194000 | -1.246693000 |
| C | -0.316185000 | -0.585812000 | 0.066692000  |
| C | -3.933456000 | -1.243434000 | -0.566090000 |
| H | 0.591053000  | 2.845789000  | -0.213734000 |
| H | 2.732852000  | 2.324766000  | 1.064912000  |
| H | 5.043499000  | 1.618512000  | 0.501363000  |
| H | -0.835880000 | -2.290325000 | 3.148005000  |
| H | -4.558343000 | -0.661507000 | 0.119961000  |
| H | -0.212441000 | 1.787575000  | -1.398221000 |
| H | 0.157004000  | 0.991560000  | 1.523390000  |
| H | -4.270468000 | -2.284374000 | -0.566248000 |
| H | 1.443832000  | -3.108593000 | -1.694449000 |
| H | 0.683808000  | -2.391202000 | 2.222791000  |
| H | 3.557205000  | -2.041977000 | -1.205560000 |
| H | 5.451141000  | -0.547416000 | -0.634445000 |
| H | 0.233552000  | -0.876406000 | 3.010476000  |
| H | -4.010116000 | -0.827648000 | -1.572236000 |
| H | -0.368715000 | -3.013111000 | -1.350925000 |

|                                              |                             |
|----------------------------------------------|-----------------------------|
| Zero-point correction=                       | 0.283865 (Hartree/Particle) |
| Thermal correction to Energy=                | 0.302552                    |
| Thermal correction to Enthalpy=              | 0.303497                    |
| Thermal correction to Gibbs Free Energy=     | 0.235864                    |
| Sum of electronic and zero-point Energies=   | -970.150738                 |
| Sum of electronic and thermal Energies=      | -970.132051                 |
| Sum of electronic and thermal Enthalpies=    | -970.131106                 |
| Sum of electronic and thermal Free Energies= | -970.198739                 |

CPCM (dichloromethane) M06/def2TZVP E = - 970.1647903  
CPCM (dichloromethane) M06L/def2TZVP E = - 970.689328  
CPCM (dichloromethane) B3LYP/def2TZVP E = - 970.8181263  
CPCM (dichloromethane) B3LYP-d3/def2TZVP E = - 970.8607275

**[(neutral-5b)]**

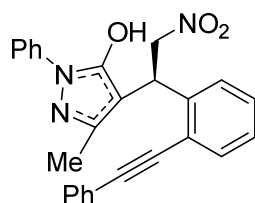

|   |             |              |              |
|---|-------------|--------------|--------------|
| C | 2.384440000 | 3.617317000  | -0.181618000 |
| C | 7.032982000 | -2.434268000 | 0.537932000  |
| C | 3.963137000 | 0.449199000  | 0.129416000  |
| C | 6.300949000 | -0.131039000 | 0.635036000  |
| C | 4.998000000 | -0.521775000 | 0.266781000  |
| C | 1.403045000 | 4.587853000  | -0.350763000 |
| C | 0.685543000 | 1.863878000  | -0.257763000 |
| C | 2.046636000 | 2.249855000  | -0.138228000 |

|   |              |              |              |
|---|--------------|--------------|--------------|
| C | -1.083746000 | 0.109976000  | 0.304860000  |
| C | -2.277238000 | -0.105696000 | -0.369768000 |
| C | -0.281331000 | 2.856520000  | -0.430912000 |
| C | 3.079828000  | 1.279322000  | 0.014875000  |
| C | -5.335206000 | -1.162445000 | 1.432361000  |
| C | 0.569307000  | -0.191237000 | -1.636526000 |
| C | 0.304052000  | 0.378090000  | -0.221920000 |
| C | 0.066375000  | 4.207145000  | -0.479851000 |
| C | 5.744089000  | -2.830027000 | 0.171087000  |
| C | 7.307022000  | -1.083655000 | 0.768618000  |
| C | -4.652457000 | -0.513795000 | 0.395580000  |
| C | 4.729935000  | -1.886107000 | 0.034823000  |
| C | -5.333696000 | -0.137263000 | -0.768416000 |
| C | -7.378812000 | -1.079219000 | 0.134203000  |
| C | -6.691636000 | -0.431667000 | -0.892673000 |
| C | -6.693920000 | -1.436767000 | 1.297540000  |
| O | -2.550073000 | -0.191480000 | -1.695560000 |
| O | 1.252090000  | -2.377586000 | -1.152359000 |
| O | -0.643808000 | -2.141010000 | -2.185980000 |
| N | 0.383689000  | -1.686301000 | -1.662584000 |
| N | -3.268670000 | -0.231418000 | 0.568639000  |
| N | -2.761317000 | -0.107908000 | 1.833225000  |
| C | -0.578505000 | 0.284618000  | 2.875143000  |
| C | -1.459034000 | 0.090524000  | 1.679166000  |
| H | -0.106492000 | 0.224412000  | -2.381458000 |
| H | 3.427753000  | 3.899726000  | -0.080441000 |
| H | -1.323615000 | 2.565174000  | -0.514725000 |
| H | 1.023585000  | -0.122526000 | 0.436722000  |
| H | -4.809864000 | 0.375392000  | -1.564187000 |
| H | 8.308032000  | -0.771825000 | 1.054027000  |
| H | 1.610571000  | -0.025471000 | -1.913847000 |
| H | 1.680715000  | 5.637728000  | -0.381016000 |
| H | 7.820838000  | -3.175040000 | 0.643490000  |
| H | -0.707282000 | 4.958097000  | -0.612686000 |
| H | 6.508741000  | 0.919389000  | 0.814476000  |
| H | 3.727638000  | -2.187576000 | -0.253217000 |
| H | -4.792810000 | -1.432530000 | 2.330167000  |
| H | -8.437475000 | -1.300311000 | 0.031043000  |
| H | -7.214543000 | -0.139514000 | -1.799417000 |
| H | 5.527245000  | -3.879183000 | -0.010080000 |
| H | -0.107299000 | 1.275063000  | 2.872283000  |
| H | -1.173348000 | 0.187387000  | 3.786931000  |
| H | 0.227711000  | -0.459144000 | 2.907459000  |
| H | -7.217147000 | -1.939372000 | 2.106572000  |
| H | -2.013099000 | -0.925907000 | -2.069749000 |

|                                              |                             |
|----------------------------------------------|-----------------------------|
| Zero-point correction=                       | 0.417166 (Hartree/Particle) |
| Thermal correction to Energy=                | 0.444410                    |
| Thermal correction to Enthalpy=              | 0.445354                    |
| Thermal correction to Gibbs Free Energy=     | 0.356080                    |
| Sum of electronic and zero-point Energies=   | -1392.767947                |
| Sum of electronic and thermal Energies=      | -1392.740704                |
| Sum of electronic and thermal Enthalpies=    | -1392.739759                |
| Sum of electronic and thermal Free Energies= | -1392.829034                |

CPCM (dichloromethane) M06/def2TZVP E = - 1392.7232766  
 CPCM (dichloromethane) M06L/def2TZVP E = - 1393.5237496  
 CPCM (dichloromethane) B3LYP/def2TZVP E = - 1393.7178437  
 CPCM (dichloromethane) B3LYP-d3/def2TZVP E = - 1393.7743695

**[(neutral-TS-6b)]**

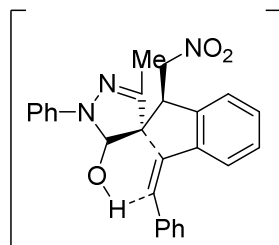

|   |              |              |              |
|---|--------------|--------------|--------------|
| C | -2.802958000 | 1.144186000  | -2.094776000 |
| C | 1.547299000  | 5.577484000  | 0.060687000  |
| C | 0.090546000  | 1.570218000  | -0.107945000 |
| C | 1.693432000  | 3.260476000  | 0.734741000  |
| C | 0.581267000  | 2.946742000  | -0.064613000 |
| C | -4.101112000 | 0.764804000  | -2.433739000 |
| C | -2.707666000 | -0.677778000 | -0.471435000 |
| C | -2.099532000 | 0.428572000  | -1.108816000 |
| C | -0.452348000 | -1.565075000 | 0.046629000  |
| C | 0.793138000  | -1.164670000 | 0.601896000  |
| C | -4.008309000 | -1.034483000 | -0.816421000 |
| C | -0.815272000 | 0.866251000  | -0.661420000 |
| C | 3.956352000  | -2.016098000 | -1.197647000 |
| C | -1.928198000 | -0.772812000 | 1.948558000  |
| C | -1.867299000 | -1.430685000 | 0.559740000  |
| C | -4.706330000 | -0.316561000 | -1.793381000 |
| C | 0.442157000  | 5.273901000  | -0.740598000 |
| C | 2.170623000  | 4.567933000  | 0.796239000  |
| C | 3.180991000  | -1.662445000 | -0.084898000 |
| C | -0.038155000 | 3.970172000  | -0.806659000 |
| C | 3.802493000  | -1.212372000 | 1.088322000  |
| C | 5.971523000  | -1.457747000 | 0.026906000  |
| C | 5.192771000  | -1.108335000 | 1.130549000  |
| C | 5.343938000  | -1.915714000 | -1.133329000 |
| O | 1.043786000  | -0.246762000 | 1.467033000  |
| O | -3.714449000 | 0.064185000  | 3.202209000  |
| O | -3.915226000 | -1.952130000 | 2.398774000  |
| N | -3.307259000 | -0.894157000 | 2.556539000  |
| N | 1.769397000  | -1.785662000 | -0.168301000 |
| N | 1.215310000  | -2.584755000 | -1.131048000 |
| C | -1.001269000 | -3.237943000 | -1.918251000 |
| C | -0.092456000 | -2.459008000 | -1.018507000 |
| H | -1.256694000 | -1.276069000 | 2.649281000  |
| H | -2.329226000 | 1.984545000  | -2.592315000 |
| H | -4.476419000 | -1.880516000 | -0.321927000 |
| H | -2.294218000 | -2.432818000 | 0.677938000  |
| H | 3.204232000  | -0.945649000 | 1.949185000  |
| H | 3.031471000  | 4.797530000  | 1.417832000  |
| H | -1.699753000 | 0.290155000  | 1.945640000  |
| H | -4.635153000 | 1.313903000  | -3.203906000 |

|   |              |              |              |
|---|--------------|--------------|--------------|
| H | 1.920798000  | 6.596616000  | 0.108029000  |
| H | -5.716907000 | -0.611920000 | -2.059930000 |
| H | 2.179774000  | 2.470689000  | 1.299998000  |
| H | -0.897731000 | 3.735036000  | -1.427295000 |
| H | 3.461272000  | -2.372037000 | -2.092785000 |
| H | 7.054053000  | -1.377058000 | 0.070707000  |
| H | 5.667447000  | -0.758462000 | 2.043558000  |
| H | -0.045460000 | 6.056424000  | -1.315566000 |
| H | -0.403341000 | -3.872329000 | -2.577554000 |
| H | -1.682436000 | -3.881002000 | -1.345916000 |
| H | -1.622805000 | -2.578637000 | -2.535329000 |
| H | 5.936362000  | -2.194015000 | -2.000963000 |
| H | 0.675950000  | 0.831203000  | 0.715877000  |

Zero-point correction= 0.410874 (Hartree/Particle)  
 Thermal correction to Energy= 0.437449  
 Thermal correction to Enthalpy= 0.438393  
 Thermal correction to Gibbs Free Energy= 0.350892  
 Sum of electronic and zero-point Energies= -1392.722565  
 Sum of electronic and thermal Energies= -1392.695990  
 Sum of electronic and thermal Enthalpies= -1392.695046  
 Sum of electronic and thermal Free Energies= -1392.782547

CPCM (dichloromethane) M06/def2TZVP E = - 1392.6661572  
 CPCM (dichloromethane) M06L/def2TZVP E = - 1393.4762375  
 CPCM (dichloromethane) B3LYP/def2TZVP E = - 1393.6628567  
 CPCM (dichloromethane) B3LYP-d3/def2TZVP E = - 1393.7240126

*[(neutral-7b)]*

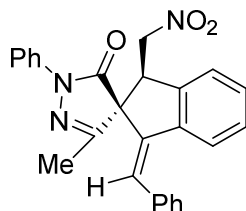

|   |              |              |              |
|---|--------------|--------------|--------------|
| C | -3.212423000 | 1.166155000  | -1.182759000 |
| C | -1.567628000 | -1.149325000 | 0.476035000  |
| C | -3.718460000 | 2.336992000  | -1.744040000 |
| C | -1.308751000 | 2.425555000  | -0.361109000 |
| C | -2.004773000 | 1.210169000  | -0.471355000 |
| C | 0.162066000  | 0.695695000  | 0.493995000  |
| C | 1.147746000  | 0.124597000  | -0.548856000 |
| C | -1.827214000 | 3.597861000  | -0.905363000 |
| C | -1.249968000 | 0.130027000  | 0.182515000  |
| C | 3.837037000  | -2.225659000 | 0.615357000  |
| C | 1.133978000  | 3.038637000  | -0.213531000 |
| C | -0.013523000 | 2.253378000  | 0.416521000  |
| C | -3.039153000 | 3.550726000  | -1.597859000 |
| C | 3.043087000  | -1.533822000 | -0.311069000 |
| C | 3.298211000  | -1.657889000 | -1.685636000 |
| C | 5.140267000  | -3.164486000 | -1.200521000 |
| C | 4.345562000  | -2.472316000 | -2.114624000 |



|   |              |              |              |
|---|--------------|--------------|--------------|
| C | 4.877535000  | -3.034419000 | 0.163979000  |
| O | 1.170692000  | 0.366892000  | -1.745966000 |
| O | 2.324299000  | 2.666715000  | 1.795394000  |
| O | 3.320275000  | 3.730907000  | 0.173864000  |
| N | 2.362809000  | 3.145589000  | 0.662955000  |
| N | 1.981214000  | -0.717840000 | 0.162277000  |
| N | 1.726154000  | -0.681701000 | 1.545754000  |
| C | 0.253103000  | 0.389201000  | 3.145081000  |
| C | 0.749976000  | 0.126828000  | 1.763052000  |
| H | 1.474727000  | 2.605876000  | -1.155355000 |
| H | -3.744528000 | 0.231139000  | -1.309802000 |
| H | -1.302206000 | 4.544400000  | -0.805206000 |
| H | -0.150370000 | 2.627639000  | 1.438568000  |
| H | 2.689158000  | -1.119206000 | -2.398026000 |
| H | 0.853942000  | 4.078063000  | -0.399724000 |
| H | -4.649254000 | 2.303119000  | -2.303399000 |
| H | -3.447890000 | 4.458410000  | -2.032836000 |
| H | 3.631958000  | -2.122856000 | 1.672995000  |
| H | 5.954179000  | -3.795508000 | -1.546208000 |
| H | 4.537208000  | -2.561630000 | -3.180653000 |
| H | 0.784584000  | -0.247109000 | 3.856706000  |
| H | 0.424748000  | 1.436334000  | 3.420976000  |
| H | -0.822786000 | 0.191959000  | 3.218138000  |
| H | 5.487151000  | -3.564843000 | 0.890725000  |
| H | -0.759350000 | -1.765608000 | 0.870634000  |
| C | -2.852013000 | -1.864952000 | 0.356180000  |
| C | -4.075893000 | -1.301835000 | 0.759005000  |
| C | -2.849944000 | -3.198342000 | -0.091373000 |
| C | -5.258435000 | -2.035897000 | 0.684413000  |
| H | -4.093589000 | -0.288384000 | 1.148618000  |
| C | -4.033548000 | -3.929320000 | -0.174350000 |
| H | -1.908934000 | -3.657335000 | -0.384649000 |
| C | -5.244125000 | -3.349936000 | 0.210986000  |
| H | -6.192421000 | -1.583321000 | 1.007198000  |
| H | -4.009201000 | -4.954388000 | -0.534343000 |
| H | -6.166802000 | -3.920929000 | 0.154363000  |

|                                              |                             |
|----------------------------------------------|-----------------------------|
| Zero-point correction=                       | 0.418069 (Hartree/Particle) |
| Thermal correction to Energy=                | 0.444409                    |
| Thermal correction to Enthalpy=              | 0.445353                    |
| Thermal correction to Gibbs Free Energy=     | 0.358014                    |
| Sum of electronic and zero-point Energies=   | -1392.808425                |
| Sum of electronic and thermal Energies=      | -1392.782085                |
| Sum of electronic and thermal Enthalpies=    | -1392.781141                |
| Sum of electronic and thermal Free Energies= | -1392.868480                |

CPCM (dichloromethane) M06/def2TZVP E = - 1392.7637041  
CPCM (dichloromethane) M06L/def2TZVP E = - 1393.5655819  
CPCM (dichloromethane) B3LYP/def2TZVP E = - 1393.7522105  
CPCM (dichloromethane) B3LYP-d3/def2TZVP E = - 1393.815107

*[(radical-5a)]*

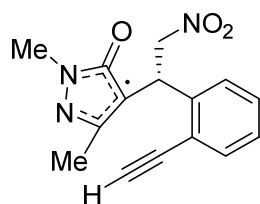

|   |              |              |              |
|---|--------------|--------------|--------------|
| O | -1.586412000 | 2.635153000  | -2.506621000 |
| O | -1.114704000 | 2.947018000  | -0.401312000 |
| O | -1.733993000 | -1.499512000 | -1.506261000 |
| N | -2.746706000 | -1.422074000 | 0.601101000  |
| N | -2.573541000 | -0.802910000 | 1.765651000  |
| N | -0.989841000 | 2.358439000  | -1.472529000 |
| C | -1.459159000 | -0.008116000 | 1.626933000  |
| C | -1.767056000 | -1.063605000 | -0.349755000 |
| C | 3.802951000  | -1.978248000 | -0.519597000 |
| C | 2.707083000  | -0.020682000 | 0.422879000  |
| C | 2.793934000  | 1.123468000  | 1.279018000  |
| C | 1.516945000  | -1.463409000 | -1.116781000 |
| C | 3.834092000  | -0.857066000 | 0.301673000  |
| C | 2.640635000  | -2.281657000 | -1.230642000 |
| C | 1.527274000  | -0.327294000 | -0.298974000 |
| C | 0.298420000  | 0.582245000  | -0.194819000 |
| C | 0.013253000  | 1.224463000  | -1.561506000 |
| C | -1.028244000 | 0.846280000  | 2.777696000  |
| C | 2.897008000  | 2.083555000  | 2.009529000  |
| C | -0.911931000 | -0.120139000 | 0.363845000  |
| C | -3.849480000 | -2.334790000 | 0.375517000  |
| H | 0.915986000  | 1.684584000  | -1.974073000 |
| H | 0.611882000  | -1.715344000 | -1.661267000 |
| H | 2.604679000  | -3.156783000 | -1.873495000 |
| H | -1.641186000 | 0.623135000  | 3.654595000  |
| H | -4.804192000 | -1.814515000 | 0.496076000  |
| H | -0.401505000 | 0.528421000  | -2.289042000 |
| H | -3.800573000 | -3.169217000 | 1.081010000  |
| H | 2.988071000  | 2.934461000  | 2.646149000  |
| H | 0.024590000  | 0.680873000  | 3.030287000  |
| H | 4.729654000  | -0.608990000 | 0.862655000  |
| H | 4.680700000  | -2.612852000 | -0.602798000 |
| H | -1.143184000 | 1.908952000  | 2.532966000  |
| H | -3.756121000 | -2.705193000 | -0.646567000 |
| H | 0.548323000  | 1.396975000  | 0.487391000  |

Zero-point correction= 0.268727 (Hartree/Particle)  
 Thermal correction to Energy= 0.288770  
 Thermal correction to Enthalpy= 0.289714  
 Thermal correction to Gibbs Free Energy= 0.216823  
 Sum of electronic and zero-point Energies= -969.489546  
 Sum of electronic and thermal Energies= -969.469503  
 Sum of electronic and thermal Enthalpies= -969.468559  
 Sum of electronic and thermal Free Energies= -969.541451

CPCM (dichloromethane) M06/def2TZVP E = - 969.4861822  
 CPCM (dichloromethane) M06L/def2TZVP E = - 970.0137265  
 CPCM (dichloromethane) ROB3LYP/def2TZVP E = - 970.1418038  
 CPCM (dichloromethane) ROB3LYP-d3/def2TZVP E = - 970.1795332

**[(radical-TS-6a)]**

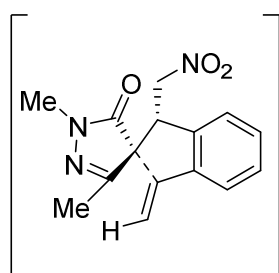

|   |              |              |              |
|---|--------------|--------------|--------------|
| O | 2.676284000  | 2.966360000  | -0.891331000 |
| O | 2.162511000  | 2.701275000  | 1.210721000  |
| O | -2.044246000 | 1.607951000  | -1.359464000 |
| N | -3.240148000 | 0.159421000  | 0.016003000  |
| N | -2.999921000 | -0.642578000 | 1.113259000  |
| N | 1.948773000  | 2.559959000  | 0.005622000  |
| C | -1.703007000 | -0.688579000 | 1.290589000  |
| C | -2.091487000 | 0.751067000  | -0.481678000 |
| C | 3.096826000  | -2.565612000 | -0.546557000 |
| C | 0.930872000  | -1.502739000 | -0.617117000 |
| C | -0.461952000 | -1.426869000 | -1.024441000 |
| C | 2.724356000  | -0.496477000 | 0.663581000  |
| C | 1.781031000  | -2.550513000 | -1.001597000 |
| C | 3.565923000  | -1.545202000 | 0.287184000  |
| C | 1.406489000  | -0.470311000 | 0.204782000  |
| C | 0.399267000  | 0.638067000  | 0.482020000  |
| C | 0.666937000  | 1.874252000  | -0.400731000 |
| C | -1.109318000 | -1.489975000 | 2.404282000  |
| C | -1.340895000 | -1.910790000 | -1.774152000 |
| C | -0.992300000 | 0.066271000  | 0.266987000  |
| C | -4.594863000 | 0.528964000  | -0.331576000 |
| H | 0.770213000  | 1.637034000  | -1.457270000 |
| H | 3.092210000  | 0.296037000  | 1.308164000  |
| H | 4.590675000  | -1.566862000 | 0.646959000  |
| H | -1.909915000 | -1.914867000 | 3.014804000  |
| H | -5.081818000 | 1.053069000  | 0.498223000  |
| H | -0.114717000 | 2.627278000  | -0.285048000 |
| H | 0.491135000  | 0.972180000  | 1.522399000  |
| H | -5.180068000 | -0.360754000 | -0.582366000 |
| H | -2.307088000 | -2.046659000 | -2.212746000 |
| H | -0.487169000 | -2.306893000 | 2.019791000  |
| H | 1.400978000  | -3.341311000 | -1.640633000 |
| H | 3.756871000  | -3.378720000 | -0.835125000 |
| H | -0.469810000 | -0.872213000 | 3.047209000  |
| H | -4.536089000 | 1.191049000  | -1.197415000 |

|                                            |                             |
|--------------------------------------------|-----------------------------|
| Zero-point correction=                     | 0.267630 (Hartree/Particle) |
| Thermal correction to Energy=              | 0.286666                    |
| Thermal correction to Enthalpy=            | 0.287610                    |
| Thermal correction to Gibbs Free Energy=   | 0.218884                    |
| Sum of electronic and zero-point Energies= | -969.454035                 |
| Sum of electronic and thermal Energies=    | -969.434999                 |
| Sum of electronic and thermal Enthalpies=  | -969.434055                 |

Sum of electronic and thermal Free Energies= -969.502781

CPCM (dichloromethane) M06/def2TZVP E = - 969.4564493

CPCM (dichloromethane) M06L/def2TZVP E = - 969.982247

CPCM (dichloromethane) ROB3LYP/def2TZVP E = - 970.1063088

CPCM (dichloromethane) ROB3LYP-d3/def2TZVP E = - 970.147028

*[(radical-7a)]*

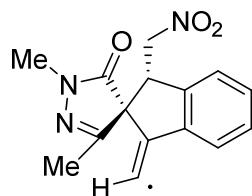

|   |              |              |              |
|---|--------------|--------------|--------------|
| O | 2.267893000  | 3.266136000  | -0.776627000 |
| O | 1.679898000  | 2.851584000  | 1.281671000  |
| O | -2.131571000 | 1.154920000  | -1.647939000 |
| N | -3.208250000 | 0.122252000  | 0.123455000  |
| N | -2.898633000 | -0.696380000 | 1.211918000  |
| N | 1.562944000  | 2.720915000  | 0.062575000  |
| C | -1.635602000 | -0.950058000 | 1.175858000  |
| C | -2.128341000 | 0.439547000  | -0.656372000 |
| C | 3.377764000  | -2.250959000 | -0.460337000 |
| C | 1.121945000  | -1.435746000 | -0.584173000 |
| C | -0.309254000 | -1.381508000 | -0.938096000 |
| C | 2.764500000  | -0.216184000 | 0.722298000  |
| C | 2.077173000  | -2.390558000 | -0.943206000 |
| C | 3.717896000  | -1.175898000 | 0.370019000  |
| C | 1.464980000  | -0.350993000 | 0.235298000  |
| C | 0.283535000  | 0.589437000  | 0.419719000  |
| C | 0.431821000  | 1.856645000  | -0.442220000 |
| C | -0.985903000 | -1.817616000 | 2.202937000  |
| C | -0.956091000 | -2.100976000 | -1.829246000 |
| C | -0.940794000 | -0.298260000 | -0.012161000 |
| C | -4.564052000 | 0.586273000  | -0.065269000 |
| H | 0.652851000  | 1.645166000  | -1.486483000 |
| H | 3.033569000  | 0.618284000  | 1.362761000  |
| H | 4.732959000  | -1.086010000 | 0.746534000  |
| H | -1.732410000 | -2.141040000 | 2.932466000  |
| H | -4.570683000 | 1.201621000  | -0.966740000 |
| H | -0.454568000 | 2.492755000  | -0.394147000 |
| H | 0.170408000  | 0.915154000  | 1.457781000  |
| H | -4.890548000 | 1.183419000  | 0.792672000  |
| H | -1.952789000 | -2.190858000 | -2.236459000 |
| H | -0.533164000 | -2.701878000 | 1.739139000  |
| H | 1.802819000  | -3.228735000 | -1.577168000 |
| H | 4.131557000  | -2.987932000 | -0.723379000 |
| H | -0.183545000 | -1.286461000 | 2.729647000  |
| H | -5.246106000 | -0.261002000 | -0.189377000 |

Zero-point correction= 0.270346 (Hartree/Particle)

Thermal correction to Energy= 0.289182

Thermal correction to Enthalpy= 0.290126

Thermal correction to Gibbs Free Energy= 0.221584

Sum of electronic and zero-point Energies= -969.475855  
 Sum of electronic and thermal Energies= -969.457020  
 Sum of electronic and thermal Enthalpies= -969.456076  
 Sum of electronic and thermal Free Energies= -969.524617

CPCM (dichloromethane) M06/def2TZVP E = - 969.4766711  
 CPCM (dichloromethane) M06L/def2TZVP E = - 970.0003548  
 CPCM (dichloromethane) ROB3LYP/def2TZVP E = - 970.1267942  
 CPCM (dichloromethane) ROB3LYP-d3/def2TZVP E = - 970.167595

*[(radical-5b)]*

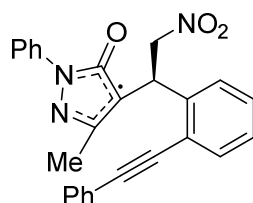

|   |              |              |              |
|---|--------------|--------------|--------------|
| C | -2.192403000 | 3.718232000  | -0.278380000 |
| C | -6.923575000 | -2.352420000 | -0.465172000 |
| C | -3.871900000 | 0.573408000  | -0.288832000 |
| C | -4.635258000 | -1.740013000 | 0.030740000  |
| C | -4.902626000 | -0.409252000 | -0.351395000 |
| C | -1.184261000 | 4.665571000  | -0.138259000 |
| C | -0.594625000 | 1.927766000  | 0.183708000  |
| C | -1.919136000 | 2.345811000  | -0.114570000 |
| C | 1.012431000  | -0.026030000 | -0.206172000 |
| C | 2.318986000  | 0.122527000  | 0.416199000  |
| C | 0.397958000  | 2.898935000  | 0.337339000  |
| C | -2.979347000 | 1.398923000  | -0.226044000 |
| C | 5.358553000  | -0.889848000 | -1.585528000 |
| C | -0.476494000 | 0.048760000  | 1.835177000  |
| C | -0.306675000 | 0.432304000  | 0.354700000  |
| C | 0.111810000  | 4.255926000  | 0.178054000  |
| C | -7.196744000 | -1.035655000 | -0.844501000 |
| C | -5.642374000 | -2.699254000 | -0.028316000 |
| C | 4.631171000  | -0.629080000 | -0.415832000 |
| C | -6.197483000 | -0.068032000 | -0.789931000 |
| C | 5.289795000  | -0.492899000 | 0.813827000  |
| C | 7.411030000  | -0.875185000 | -0.300345000 |
| C | 6.678396000  | -0.612600000 | 0.857580000  |
| C | 6.742991000  | -1.015670000 | -1.519276000 |
| O | 2.650715000  | 0.671797000  | 1.468575000  |
| O | -0.064656000 | -1.893339000 | 3.072216000  |
| O | -1.073419000 | -2.131124000 | 1.155759000  |
| N | -0.533597000 | -1.453078000 | 2.030514000  |
| N | 3.216397000  | -0.520963000 | -0.498558000 |
| N | 2.562799000  | -0.998375000 | -1.561035000 |
| C | 0.252687000  | -1.160395000 | -2.419471000 |
| C | 1.235716000  | -0.707605000 | -1.386395000 |
| H | 0.336750000  | 0.401167000  | 2.467002000  |
| H | -3.207422000 | 4.023055000  | -0.513571000 |
| H | 1.406150000  | 2.595282000  | 0.596984000  |
| H | -1.088394000 | -0.104924000 | -0.187069000 |
| H | 4.724545000  | -0.292536000 | 1.713632000  |

|   |              |              |              |
|---|--------------|--------------|--------------|
| H | -5.426178000 | -3.721670000 | 0.269120000  |
| H | -1.434473000 | 0.414113000  | 2.216134000  |
| H | -1.410935000 | 5.719995000  | -0.268891000 |
| H | -7.706253000 | -3.104821000 | -0.509086000 |
| H | 0.903420000  | 4.989503000  | 0.302119000  |
| H | -3.639022000 | -2.004144000 | 0.373179000  |
| H | -6.404982000 | 0.956245000  | -1.084234000 |
| H | 4.830981000  | -0.994575000 | -2.525883000 |
| H | 8.492161000  | -0.970171000 | -0.254628000 |
| H | 7.186457000  | -0.506193000 | 1.811956000  |
| H | -8.191978000 | -0.761957000 | -1.184143000 |
| H | 0.767546000  | -1.729869000 | -3.197020000 |
| H | -0.517908000 | -1.797176000 | -1.970251000 |
| H | -0.254554000 | -0.309616000 | -2.889157000 |
| H | 7.302044000  | -1.218825000 | -2.428476000 |

|                                              |                             |
|----------------------------------------------|-----------------------------|
| Zero-point correction=                       | 0.403620 (Hartree/Particle) |
| Thermal correction to Energy=                | 0.431242                    |
| Thermal correction to Enthalpy=              | 0.432186                    |
| Thermal correction to Gibbs Free Energy=     | 0.338959                    |
| Sum of electronic and zero-point Energies=   | -1392.162798                |
| Sum of electronic and thermal Energies=      | -1392.135176                |
| Sum of electronic and thermal Enthalpies=    | -1392.134231                |
| Sum of electronic and thermal Free Energies= | -1392.227459                |

CPCM (dichloromethane) M06/def2TZVP E = - 1392.1021468  
 CPCM (dichloromethane) M06L/def2TZVP E = - 1392.9078568  
 CPCM (dichloromethane) ROB3LYP/def2TZVP E = - 1393.0959609  
 CPCM (dichloromethane) ROB3LYP-d3/def2TZVP E = - 1393.1505171

**[(radical-TS-6b)]**

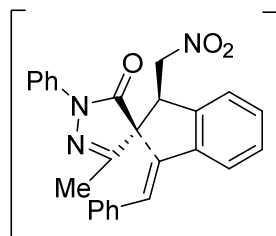

|   |              |              |              |
|---|--------------|--------------|--------------|
| C | 2.476168000  | 3.065205000  | -1.210835000 |
| C | -4.454254000 | 2.963423000  | 0.632041000  |
| C | -0.392918000 | 2.041691000  | -0.015785000 |
| C | -2.732907000 | 1.974381000  | -0.750275000 |
| C | -1.748689000 | 2.337643000  | 0.203979000  |
| C | 3.795086000  | 3.295969000  | -1.586047000 |
| C | 3.110213000  | 0.898523000  | -0.301284000 |
| C | 2.129342000  | 1.866323000  | -0.564143000 |
| C | 1.135659000  | -0.388132000 | 0.536336000  |
| C | 0.280468000  | -1.008446000 | -0.509813000 |
| C | 4.434603000  | 1.149767000  | -0.667870000 |
| C | 0.775217000  | 1.608759000  | -0.126293000 |
| C | -3.247345000 | -1.912102000 | 0.474823000  |
| C | 3.219735000  | -1.619446000 | -0.209016000 |
| C | 2.648887000  | -0.352252000 | 0.444703000  |
| C | 4.776916000  | 2.339936000  | -1.309682000 |
| C | -3.493190000 | 3.330693000  | 1.580939000  |
| C | -4.068301000 | 2.284255000  | -0.529012000 |

|   |              |              |              |
|---|--------------|--------------|--------------|
| C | -2.152516000 | -1.733797000 | -0.384388000 |
| C | -2.154467000 | 3.024871000  | 1.376295000  |
| C | -2.278152000 | -2.037220000 | -1.749604000 |
| C | -4.588296000 | -2.695804000 | -1.387541000 |
| C | -3.495447000 | -2.514658000 | -2.235463000 |
| C | -4.452760000 | -2.391637000 | -0.031592000 |
| O | 0.558042000  | -1.258034000 | -1.681851000 |
| O | 2.744204000  | -2.718427000 | 1.834586000  |
| O | 3.469374000  | -3.901270000 | 0.153591000  |
| N | 3.125606000  | -2.846622000 | 0.672831000  |
| N | -0.934942000 | -1.236045000 | 0.143162000  |
| N | -0.848904000 | -0.954306000 | 1.499239000  |
| C | 0.769994000  | -0.136327000 | 3.131112000  |
| C | 0.358747000  | -0.510332000 | 1.743887000  |
| H | 2.697320000  | -1.874016000 | -1.131985000 |
| H | 1.704295000  | 3.801587000  | -1.411333000 |
| H | 5.213207000  | 0.423638000  | -0.449361000 |
| H | 3.045437000  | -0.305023000 | 1.466081000  |
| H | -1.430298000 | -1.909322000 | -2.408307000 |
| H | -4.814847000 | 1.990755000  | -1.261262000 |
| H | 4.286492000  | -1.531877000 | -0.423894000 |
| H | 4.059703000  | 4.221215000  | -2.089892000 |
| H | -5.500656000 | 3.203230000  | 0.798465000  |
| H | 5.809739000  | 2.521053000  | -1.593462000 |
| H | -2.429726000 | 1.439311000  | -1.644074000 |
| H | -1.404231000 | 3.305913000  | 2.108674000  |
| H | -3.139503000 | -1.673221000 | 1.525013000  |
| H | -5.530864000 | -3.071205000 | -1.776179000 |
| H | -3.581298000 | -2.750504000 | -3.293086000 |
| H | -3.793335000 | 3.855646000  | 2.483550000  |
| H | -0.062363000 | -0.304740000 | 3.818944000  |
| H | 1.622924000  | -0.740985000 | 3.460068000  |
| H | 1.064588000  | 0.919205000  | 3.187043000  |
| H | -5.292609000 | -2.527719000 | 0.644927000  |

|                                              |                             |
|----------------------------------------------|-----------------------------|
| Zero-point correction=                       | 0.402499 (Hartree/Particle) |
| Thermal correction to Energy=                | 0.429221                    |
| Thermal correction to Enthalpy=              | 0.430165                    |
| Thermal correction to Gibbs Free Energy=     | 0.339663                    |
| Sum of electronic and zero-point Energies=   | -1392.137899                |
| Sum of electronic and thermal Energies=      | -1392.111177                |
| Sum of electronic and thermal Enthalpies=    | -1392.110233                |
| Sum of electronic and thermal Free Energies= | -1392.200735                |

CPCM (dichloromethane) M06/def2TZVP E = - 1392.0850771  
CPCM (dichloromethane) M06L/def2TZVP E = - 1392.890299  
CPCM (dichloromethane) ROB3LYP/def2TZVP E = - 1393.0713263  
CPCM (dichloromethane) ROB3LYP-d3/def2TZVP E = - 1393.132382

*[(radical-7b)]*

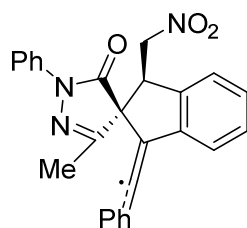

|   |              |              |              |
|---|--------------|--------------|--------------|
| C | 3.800498000  | 2.004889000  | -0.015689000 |
| C | -2.619397000 | 4.646308000  | -0.824716000 |
| C | 0.635919000  | 2.081441000  | -0.096603000 |
| C | -1.063824000 | 2.964961000  | -1.612852000 |
| C | -0.451067000 | 2.907823000  | -0.321417000 |
| C | 5.159776000  | 1.696271000  | -0.023591000 |
| C | 3.299981000  | -0.368764000 | 0.132604000  |
| C | 2.872717000  | 0.962055000  | 0.066083000  |
| C | 0.883297000  | -0.404945000 | 0.429334000  |
| C | -0.391926000 | -0.728400000 | -0.363501000 |
| C | 4.659914000  | -0.675381000 | 0.126049000  |
| C | 1.399533000  | 1.035734000  | 0.101210000  |
| C | -3.587290000 | -1.339331000 | 1.514267000  |
| C | 2.081746000  | -2.136909000 | -1.136304000 |
| C | 2.126966000  | -1.335281000 | 0.168080000  |
| C | 5.589409000  | 0.364890000  | 0.050467000  |
| C | -2.031789000 | 4.604603000  | 0.447882000  |
| C | -2.128202000 | 3.820229000  | -1.845932000 |
| C | -2.760080000 | -1.193593000 | 0.391011000  |
| C | -0.966130000 | 3.757955000  | 0.705674000  |
| C | -3.294192000 | -1.346025000 | -0.897657000 |
| C | -5.479195000 | -1.787514000 | 0.066640000  |
| C | -4.648853000 | -1.641641000 | -1.044733000 |
| C | -4.937792000 | -1.634652000 | 1.343827000  |
| O | -0.498887000 | -0.785381000 | -1.580833000 |
| O | 0.523775000  | -3.536058000 | -0.046058000 |
| O | 1.256774000  | -4.128218000 | -2.013219000 |
| N | 1.208777000  | -3.370011000 | -1.053618000 |
| N | -1.386095000 | -0.889838000 | 0.580137000  |
| N | -0.905949000 | -0.744632000 | 1.890194000  |
| C | 1.149429000  | -0.269086000 | 3.086634000  |
| C | 0.352890000  | -0.488800000 | 1.842771000  |
| H | 1.678628000  | -1.562280000 | -1.971513000 |
| H | 3.460629000  | 3.035444000  | -0.066729000 |
| H | 4.999027000  | -1.707449000 | 0.183097000  |
| H | 2.224157000  | -2.051948000 | 0.989599000  |
| H | -2.654668000 | -1.237347000 | -1.762057000 |
| H | -2.589104000 | 3.843740000  | -2.829758000 |
| H | 3.069776000  | -2.514637000 | -1.406935000 |
| H | 5.893181000  | 2.495850000  | -0.081741000 |
| H | -3.454610000 | 5.313275000  | -1.017417000 |
| H | 6.652106000  | 0.139381000  | 0.051680000  |
| H | -0.691792000 | 2.309973000  | -2.393857000 |
| H | -0.510113000 | 3.725918000  | 1.690354000  |
| H | -3.165664000 | -1.222309000 | 2.504044000  |
| H | -6.533041000 | -2.018989000 | -0.060213000 |
| H | -5.053464000 | -1.760188000 | -2.046451000 |
| H | -2.414816000 | 5.240166000  | 1.241838000  |
| H | 0.502974000  | -0.369827000 | 3.961659000  |



|   |              |              |             |
|---|--------------|--------------|-------------|
| H | 1.968739000  | -0.994138000 | 3.170853000 |
| H | 1.602234000  | 0.729719000  | 3.088443000 |
| H | -5.568632000 | -1.746757000 | 2.221758000 |

|                                              |                             |
|----------------------------------------------|-----------------------------|
| Zero-point correction=                       | 0.404267 (Hartree/Particle) |
| Thermal correction to Energy=                | 0.430852                    |
| Thermal correction to Enthalpy=              | 0.431796                    |
| Thermal correction to Gibbs Free Energy=     | 0.342990                    |
| Sum of electronic and zero-point Energies=   | -1392.158959                |
| Sum of electronic and thermal Energies=      | -1392.132374                |
| Sum of electronic and thermal Enthalpies=    | -1392.131430                |
| Sum of electronic and thermal Free Energies= | -1392.220235                |

CPCM (dichloromethane) M06/def2TZVP E = - 1392.1072008  
 CPCM (dichloromethane) M06L/def2TZVP E = - 1392.9079583  
 CPCM (dichloromethane) ROB3LYP/def2TZVP E = - 1393.0909303  
 CPCM (dichloromethane) ROB3LYP-d3/def2TZVP E = - 1393.1507433

***[(endo-radical-TS-6b)]***

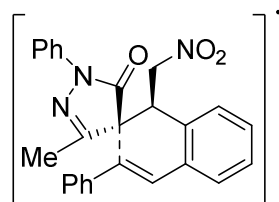

|   |              |              |              |
|---|--------------|--------------|--------------|
| C | -0.792205000 | 1.666747000  | -0.180390000 |
| C | -1.948744000 | 1.667889000  | -0.836605000 |
| C | -2.845383000 | 0.602833000  | -1.172651000 |
| C | -2.635022000 | -0.619682000 | -0.486529000 |
| C | -1.580281000 | -0.635386000 | 0.616903000  |
| C | -0.324962000 | 0.273947000  | 0.321729000  |
| H | -3.993512000 | 1.655174000  | -2.653653000 |
| C | -3.855988000 | 0.710837000  | -2.135773000 |
| C | -3.452757000 | -1.705493000 | -0.791668000 |
| C | -4.459871000 | -1.592255000 | -1.758602000 |
| C | -4.662964000 | -0.387608000 | -2.428408000 |
| H | -3.328646000 | -2.655849000 | -0.282118000 |
| H | -5.083321000 | -2.453529000 | -1.980536000 |
| H | -5.444957000 | -0.302159000 | -3.177386000 |
| H | -2.042734000 | -0.186686000 | 1.506585000  |
| C | -1.144632000 | -2.052424000 | 1.024229000  |
| N | -2.095172000 | -2.665932000 | 2.030962000  |
| O | -2.481055000 | -3.810982000 | 1.821875000  |
| O | -2.383034000 | -1.987796000 | 3.014278000  |
| C | 0.625837000  | -0.409569000 | -0.689450000 |
| O | 0.386036000  | -0.687622000 | -1.849546000 |
| N | 1.791588000  | -0.668931000 | 0.024643000  |
| N | 1.716752000  | -0.220250000 | 1.351998000  |
| C | 0.565116000  | 0.323250000  | 1.546295000  |
| C | 0.182839000  | 0.878865000  | 2.878847000  |
| H | 1.040026000  | 0.837386000  | 3.555195000  |
| H | -0.150611000 | 1.918452000  | 2.785830000  |
| H | -0.640880000 | 0.304082000  | 3.321252000  |

|   |              |              |              |
|---|--------------|--------------|--------------|
| H | -1.088542000 | -2.747584000 | 0.188381000  |
| H | -0.187474000 | -2.039501000 | 1.551819000  |
| C | 0.014048000  | 2.896188000  | 0.007102000  |
| C | -0.646681000 | 4.124346000  | 0.200802000  |
| C | 1.418747000  | 2.896622000  | -0.041038000 |
| C | 0.070889000  | 5.309595000  | 0.336920000  |
| H | -1.731704000 | 4.133622000  | 0.251145000  |
| C | 2.134844000  | 4.085346000  | 0.098470000  |
| H | 1.962368000  | 1.974609000  | -0.214763000 |
| C | 1.466946000  | 5.295477000  | 0.289036000  |
| H | -0.460888000 | 6.245112000  | 0.488888000  |
| H | 3.220141000  | 4.062582000  | 0.050622000  |
| H | 2.028334000  | 6.218992000  | 0.400478000  |
| C | 2.986945000  | -1.304167000 | -0.411379000 |
| C | 4.035526000  | -1.488642000 | 0.501886000  |
| C | 3.123214000  | -1.745354000 | -1.736666000 |
| C | 5.210331000  | -2.111415000 | 0.086336000  |
| H | 3.921446000  | -1.144218000 | 1.521603000  |
| C | 4.308249000  | -2.366440000 | -2.130071000 |
| H | 2.313672000  | -1.602302000 | -2.438697000 |
| C | 5.356397000  | -2.554633000 | -1.228994000 |
| H | 6.016324000  | -2.249367000 | 0.802161000  |
| H | 4.405835000  | -2.705084000 | -3.158038000 |
| H | 6.274744000  | -3.039989000 | -1.546846000 |

Zero-point correction= 0.403190 (Hartree/Particle)  
Thermal correction to Energy= 0.429514  
Thermal correction to Enthalpy= 0.430458  
Thermal correction to Gibbs Free Energy= 0.343482  
Sum of electronic and zero-point Energies= -1392.111253  
Sum of electronic and thermal Energies= -1392.084930  
Sum of electronic and thermal Enthalpies= -1392.083986  
Sum of electronic and thermal Free Energies= -1392.170962

CPCM (dichloromethane) M06/def2TZVP E = - 1392.0629294  
CPCM (dichloromethane) M06L/def2TZVP E = - 1392.8670189  
CPCM (dichloromethane) ROB3LYP/def2TZVP E = - 1393.0449851  
CPCM (dichloromethane) ROB3LYP-d3/def2TZVP E = - 1393.1086793

**[(endo-radical-7b)]**

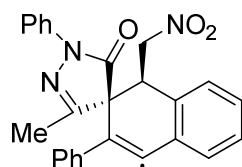

|   |             |              |              |
|---|-------------|--------------|--------------|
| C | 0.694934000 | 1.429461000  | -0.197685000 |
| C | 1.984054000 | 1.700908000  | -0.007039000 |
| C | 3.067199000 | 0.867020000  | 0.437487000  |
| C | 2.802730000 | -0.525896000 | 0.471628000  |
| C | 1.486175000 | -1.020602000 | -0.114149000 |
| C | 0.298142000 | -0.034198000 | 0.184834000  |
| H | 4.494450000 | 2.424444000  | 0.848959000  |
| C | 4.305243000 | 1.355514000  | 0.878422000  |
| C | 3.779076000 | -1.392401000 | 0.960085000  |

|   |              |              |              |
|---|--------------|--------------|--------------|
| C | 5.010188000  | -0.895464000 | 1.403299000  |
| C | 5.273883000  | 0.473994000  | 1.356527000  |
| H | 3.584025000  | -2.460785000 | 0.982763000  |
| H | 5.761254000  | -1.583174000 | 1.781098000  |
| H | 6.231720000  | 0.856912000  | 1.696938000  |
| C | -0.132053000 | -0.067928000 | 1.651296000  |
| N | -1.347135000 | -0.457716000 | 1.808447000  |
| N | -1.895200000 | -0.758004000 | 0.554630000  |
| C | -1.004268000 | -0.549420000 | -0.473085000 |
| C | -0.291108000 | 2.496008000  | -0.527321000 |
| C | -0.229324000 | 3.705778000  | 0.189464000  |
| C | -1.242626000 | 2.376233000  | -1.555069000 |
| C | -1.095153000 | 4.757476000  | -0.101599000 |
| H | 0.501904000  | 3.807990000  | 0.986022000  |
| C | -2.108637000 | 3.431568000  | -1.842037000 |
| H | -1.293672000 | 1.468625000  | -2.143751000 |
| C | -2.042252000 | 4.622713000  | -1.118242000 |
| H | -1.032914000 | 5.679770000  | 0.469886000  |
| H | -2.834209000 | 3.321106000  | -2.643433000 |
| H | -2.721686000 | 5.439766000  | -1.345298000 |
| O | -1.200118000 | -0.763329000 | -1.664246000 |
| C | 0.686845000  | 0.314512000  | 2.842288000  |
| H | 0.056943000  | 0.281983000  | 3.734552000  |
| H | 1.533133000  | -0.367867000 | 2.978810000  |
| H | 1.101192000  | 1.321533000  | 2.729384000  |
| C | -3.237918000 | -1.226376000 | 0.499084000  |
| C | -3.970110000 | -1.323399000 | 1.691555000  |
| C | -3.830855000 | -1.588415000 | -0.720123000 |
| C | -5.285631000 | -1.779587000 | 1.658684000  |
| H | -3.504194000 | -1.042471000 | 2.626914000  |
| C | -5.149478000 | -2.042217000 | -0.729258000 |
| H | -3.266467000 | -1.516014000 | -1.638580000 |
| C | -5.885079000 | -2.141820000 | 0.451549000  |
| H | -5.843164000 | -1.850275000 | 2.588772000  |
| H | -5.600619000 | -2.321373000 | -1.677655000 |
| H | -6.911386000 | -2.497227000 | 0.431958000  |
| C | 1.672011000  | -1.243099000 | -1.632244000 |
| H | 0.727834000  | -1.489925000 | -2.121249000 |
| H | 2.126772000  | -0.389484000 | -2.131799000 |
| N | 2.582765000  | -2.414134000 | -1.903388000 |
| O | 2.436447000  | -3.424932000 | -1.215956000 |
| O | 3.380906000  | -2.297306000 | -2.825100000 |
| H | 1.232264000  | -1.992193000 | 0.320214000  |

|                                              |                             |
|----------------------------------------------|-----------------------------|
| Zero-point correction=                       | 0.406138 (Hartree/Particle) |
| Thermal correction to Energy=                | 0.432146                    |
| Thermal correction to Enthalpy=              | 0.433090                    |
| Thermal correction to Gibbs Free Energy=     | 0.346223                    |
| Sum of electronic and zero-point Energies=   | -1392.137440                |
| Sum of electronic and thermal Energies=      | -1392.111432                |
| Sum of electronic and thermal Enthalpies=    | -1392.110487                |
| Sum of electronic and thermal Free Energies= | -1392.197355                |

CPCM (dichloromethane) M06/def2TZVP E = - 1392.0860012  
CPCM (dichloromethane) M06L/def2TZVP E = - 1392.8866748

CPCM (dichloromethane) ROB3LYP/def2TZVP E = - 1393.0694862  
 CPCM (dichloromethane) ROB3LYP-d3/def2TZVP E = - 1393.1327463

[(*cationic-8a*)]

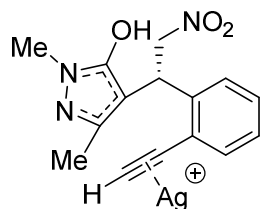

|    |              |              |              |
|----|--------------|--------------|--------------|
| O  | 1.289029000  | 2.456402000  | -1.608744000 |
| O  | 3.371613000  | 1.939597000  | -1.267483000 |
| O  | -0.931836000 | 2.980471000  | -0.219087000 |
| N  | -2.321262000 | 1.310357000  | 0.569561000  |
| N  | -2.301144000 | 0.138167000  | 1.291578000  |
| N  | 2.261662000  | 2.226420000  | -0.868010000 |
| C  | -0.996028000 | -0.066800000 | 1.591563000  |
| C  | -1.076210000 | 1.817925000  | 0.418475000  |
| C  | 3.573221000  | -2.550704000 | -0.185002000 |
| C  | 1.631697000  | -1.092879000 | -0.474621000 |
| C  | 0.481412000  | -0.866190000 | -1.282095000 |
| C  | 3.226410000  | -0.661737000 | 1.285512000  |
| C  | 2.403626000  | -2.220340000 | -0.854707000 |
| C  | 3.985215000  | -1.765959000 | 0.893203000  |
| C  | 2.052793000  | -0.290052000 | 0.624694000  |
| C  | 1.333141000  | 0.967002000  | 1.143552000  |
| C  | 2.033891000  | 2.255199000  | 0.621584000  |
| C  | -0.609135000 | -1.227616000 | 2.462101000  |
| C  | -0.488400000 | -0.861901000 | -2.048861000 |
| C  | -0.172818000 | 0.937285000  | 1.033574000  |
| C  | -3.583554000 | 1.964673000  | 0.249239000  |
| H  | 1.448369000  | 3.149304000  | 0.843291000  |
| H  | 3.558427000  | -0.074333000 | 2.138079000  |
| H  | 4.891035000  | -2.015325000 | 1.437442000  |
| H  | -0.114807000 | -0.871589000 | 3.374253000  |
| H  | -4.282899000 | 1.224686000  | -0.146155000 |
| H  | 3.030777000  | 2.339875000  | 1.050044000  |
| H  | 1.564080000  | 1.004103000  | 2.217642000  |
| H  | -3.390005000 | 2.733336000  | -0.499068000 |
| H  | -1.503503000 | -1.778327000 | 2.766747000  |
| H  | 2.062807000  | -2.821365000 | -1.691401000 |
| H  | 4.152251000  | -3.414429000 | -0.495045000 |
| H  | 0.084570000  | -1.917178000 | 1.969544000  |
| H  | -4.012838000 | 2.422306000  | 1.145053000  |
| H  | -0.927884000 | -0.619954000 | -3.000040000 |
| Ag | -2.181276000 | -1.384401000 | -0.540118000 |
| H  | -0.117191000 | 2.941938000  | -0.783490000 |

Zero-point correction= 0.283282 (Hartree/Particle)  
 Thermal correction to Energy= 0.304635  
 Thermal correction to Enthalpy= 0.305580  
 Thermal correction to Gibbs Free Energy= 0.231416  
 Sum of electronic and zero-point Energies= -1115.646024

Sum of electronic and thermal Energies= -1115.624670  
 Sum of electronic and thermal Enthalpies= -1115.623725  
 Sum of electronic and thermal Free Energies= -1115.697889

CPCM (dichloromethane) M06/def2TZVP E = - 1117.007912  
 CPCM (dichloromethane) M06L/def2TZVP E = - 1117.5991059  
 CPCM (dichloromethane) B3LYP/def2TZVP E = - 1117.6617265  
 CPCM (dichloromethane) B3LYP-d3/def2TZVP E = - 1117.7128399

*[(cationic-9a)]*

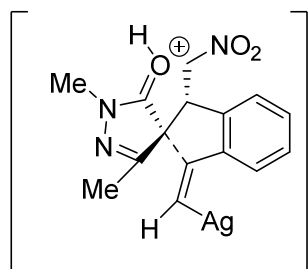

|   |              |              |              |
|---|--------------|--------------|--------------|
| O | 3.295982000  | -1.436203000 | -2.562830000 |
| O | 4.531579000  | -0.387950000 | -1.092600000 |
| O | 0.107714000  | 2.460351000  | -1.831223000 |
| N | -0.409173000 | 3.239314000  | 0.283310000  |
| N | -0.191157000 | 3.012406000  | 1.617195000  |
| N | 3.497638000  | -0.563222000 | -1.731564000 |
| C | 0.666106000  | 2.007748000  | 1.672342000  |
| C | 0.298220000  | 2.400696000  | -0.494015000 |
| C | 0.751881000  | -3.411194000 | 1.594350000  |
| C | 0.211375000  | -1.201079000 | 0.738807000  |
| C | -0.790217000 | -0.239575000 | 0.422113000  |
| C | 2.519687000  | -1.895778000 | 0.916136000  |
| C | -0.193342000 | -2.443479000 | 1.279349000  |
| C | 2.109734000  | -3.136028000 | 1.413341000  |
| C | 1.586453000  | -0.919713000 | 0.565380000  |
| C | 2.024507000  | 0.452719000  | 0.046184000  |
| C | 2.369023000  | 0.403151000  | -1.458791000 |
| C | 1.187181000  | 1.523686000  | 2.988797000  |
| C | -1.927719000 | 0.259496000  | 0.189085000  |
| C | 0.994932000  | 1.517280000  | 0.353811000  |
| C | -1.233302000 | 4.368403000  | -0.128512000 |
| H | 1.537315000  | 0.072112000  | -2.080415000 |
| H | 3.579185000  | -1.684499000 | 0.812342000  |
| H | 2.855584000  | -3.877930000 | 1.681403000  |
| H | 0.726325000  | 2.098810000  | 3.795015000  |
| H | -2.225806000 | 4.280361000  | 0.319389000  |
| H | 2.756854000  | 1.371976000  | -1.790683000 |
| H | 2.961119000  | 0.711672000  | 0.554582000  |
| H | -1.309529000 | 4.369647000  | -1.215571000 |
| H | -2.334860000 | 1.257992000  | 0.276190000  |
| H | 0.975932000  | 0.460652000  | 3.149917000  |
| H | -1.249733000 | -2.632472000 | 1.445634000  |
| H | 0.433464000  | -4.366021000 | 2.000468000  |
| H | 2.274795000  | 1.652870000  | 3.052965000  |
| H | -0.770774000 | 5.297408000  | 0.214690000  |
| H | 0.925655000  | 2.269888000  | -2.314445000 |

Ag -3.369064000 -1.155522000 -0.591087000

Zero-point correction= 0.281362 (Hartree/Particle)  
Thermal correction to Energy= 0.303107  
Thermal correction to Enthalpy= 0.304051  
Thermal correction to Gibbs Free Energy= 0.226679  
Sum of electronic and zero-point Energies= -1115.606313  
Sum of electronic and thermal Energies= -1115.584568  
Sum of electronic and thermal Enthalpies= -1115.583624  
Sum of electronic and thermal Free Energies= -1115.660996

CPCM (dichloromethane) M06/def2TZVP E = - 1116.9808214  
CPCM (dichloromethane) M06L/def2TZVP E = - 1117.5734327  
CPCM (dichloromethane) B3LYP/def2TZVP E = - 1117.6411274  
CPCM (dichloromethane) B3LYP-d3/def2TZVP E = - 1117.6883673

**[(cationic-10a)]**

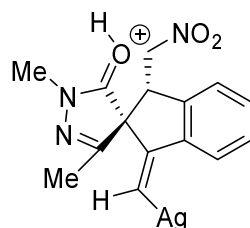

|   |              |              |              |
|---|--------------|--------------|--------------|
| O | -4.060150000 | 0.949629000  | -2.456603000 |
| O | -3.879382000 | 0.032928000  | -0.482119000 |
| O | -1.513814000 | -1.698342000 | -1.422621000 |
| N | -2.158839000 | -2.109772000 | 0.737577000  |
| N | -1.999367000 | -1.602126000 | 2.053861000  |
| N | -3.475536000 | 0.737738000  | -1.410259000 |
| C | -1.277176000 | -0.536592000 | 1.956673000  |
| C | -1.567738000 | -1.364846000 | -0.151597000 |
| C | 2.199163000  | 3.388087000  | 0.345831000  |
| C | 0.911388000  | 1.354124000  | 0.244120000  |
| C | 0.604237000  | -0.090002000 | 0.207752000  |
| C | -0.224799000 | 3.508745000  | 0.292735000  |
| C | 2.152985000  | 1.995254000  | 0.301633000  |
| C | 1.019067000  | 4.143020000  | 0.342197000  |
| C | -0.265005000 | 2.116456000  | 0.245930000  |
| C | -1.505096000 | 1.242833000  | 0.144025000  |
| C | -2.124766000 | 1.406698000  | -1.247035000 |
| C | -0.868173000 | 0.240973000  | 3.159153000  |
| C | 1.384369000  | -1.153904000 | -0.044436000 |
| C | -0.923937000 | -0.191235000 | 0.514397000  |
| C | -2.964275000 | -3.309757000 | 0.545748000  |
| H | -2.308360000 | 2.463340000  | -1.453976000 |
| H | -1.138925000 | 4.097292000  | 0.299793000  |
| H | 1.070281000  | 5.226385000  | 0.389514000  |
| H | -1.276674000 | -0.224438000 | 4.058321000  |
| H | -4.013316000 | -3.059625000 | 0.723709000  |
| H | -1.503596000 | 1.028874000  | -2.063557000 |
| H | -2.270886000 | 1.518318000  | 0.874516000  |
| H | -2.635528000 | -4.062528000 | 1.263964000  |
| H | 0.224795000  | 0.275976000  | 3.233701000  |

|    |              |              |              |
|----|--------------|--------------|--------------|
| H  | 3.071559000  | 1.415767000  | 0.334847000  |
| H  | 3.159078000  | 3.892828000  | 0.399467000  |
| H  | -1.220870000 | 1.277229000  | 3.101127000  |
| H  | -2.830568000 | -3.664617000 | -0.476315000 |
| H  | 0.936734000  | -2.146259000 | 0.018530000  |
| Ag | 3.430922000  | -1.207420000 | -0.527270000 |
| H  | -0.755584000 | -1.243542000 | -1.842219000 |

Zero-point correction= 0.284794 (Hartree/Particle)  
Thermal correction to Energy= 0.305538  
Thermal correction to Enthalpy= 0.306482  
Thermal correction to Gibbs Free Energy= 0.232981  
Sum of electronic and zero-point Energies= -1115.638339  
Sum of electronic and thermal Energies= -1115.617595  
Sum of electronic and thermal Enthalpies= -1115.616651  
Sum of electronic and thermal Free Energies= -1115.690152

CPCM (dichloromethane) M06/def2TZVP E = - 1116.9986335  
CPCM (dichloromethane) M06L/def2TZVP E = - 1117.5867959  
CPCM (dichloromethane) B3LYP/def2TZVP E = - 1117.6574334  
CPCM (dichloromethane) B3LYP-d3/def2TZVP E = - 1117.7059973

**[(cationic-8b)]**

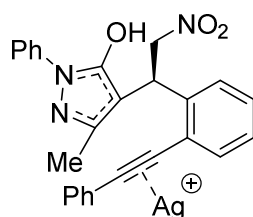

|   |              |              |              |
|---|--------------|--------------|--------------|
| C | -1.438807000 | -2.257898000 | 2.385617000  |
| C | -5.899507000 | 3.529897000  | 0.413014000  |
| C | -3.054798000 | 0.409835000  | 0.763954000  |
| C | -5.094180000 | 1.552746000  | 1.552717000  |
| C | -4.025682000 | 1.464887000  | 0.637859000  |
| C | -0.508680000 | -3.206395000 | 2.788398000  |
| C | 0.187479000  | -1.286748000 | 0.824110000  |
| C | -1.112326000 | -1.300356000 | 1.398897000  |
| C | 1.953872000  | 0.396598000  | 0.062674000  |
| C | 3.219599000  | -0.067975000 | -0.253875000 |
| C | 1.098436000  | -2.260832000 | 1.244420000  |
| C | -2.142330000 | -0.380472000 | 1.018052000  |
| C | 6.195653000  | 1.995818000  | -0.377669000 |
| C | 0.594488000  | -0.791885000 | -1.672613000 |
| C | 0.612659000  | -0.233362000 | -0.206569000 |
| C | 0.760673000  | -3.214169000 | 2.204952000  |
| C | -4.842094000 | 3.446405000  | -0.497649000 |
| C | -6.021407000 | 2.584572000  | 1.435939000  |
| C | 5.537874000  | 0.825388000  | 0.015164000  |
| C | -3.906896000 | 2.420473000  | -0.392749000 |
| C | 6.255058000  | -0.359071000 | 0.232701000  |
| C | 8.297202000  | 0.786542000  | -0.382104000 |
| C | 7.635990000  | -0.374225000 | 0.018165000  |
| C | 7.575609000  | 1.970630000  | -0.565657000 |

|    |              |              |              |
|----|--------------|--------------|--------------|
| O  | 3.541967000  | -1.209585000 | -0.909391000 |
| O  | -1.311182000 | -2.161213000 | -1.762274000 |
| O  | -1.513071000 | -0.100695000 | -2.417758000 |
| N  | -0.829870000 | -1.051116000 | -2.029458000 |
| N  | 4.125982000  | 0.845587000  | 0.192257000  |
| N  | 3.498214000  | 1.920339000  | 0.770533000  |
| C  | 1.202373000  | 2.608962000  | 1.271664000  |
| C  | 2.202561000  | 1.650212000  | 0.701967000  |
| H  | 0.955043000  | -0.039369000 | -2.371938000 |
| H  | -2.430629000 | -2.239898000 | 2.826676000  |
| H  | 2.095160000  | -2.272894000 | 0.816051000  |
| H  | -0.124877000 | 0.576221000  | -0.188110000 |
| H  | 5.754813000  | -1.241080000 | 0.623513000  |
| H  | -6.839547000 | 2.653082000  | 2.146378000  |
| H  | 1.136528000  | -1.730418000 | -1.769402000 |
| H  | -0.771112000 | -3.934979000 | 3.548968000  |
| H  | -6.626095000 | 4.332203000  | 0.327578000  |
| H  | 1.493934000  | -3.956582000 | 2.505277000  |
| H  | -5.181568000 | 0.820311000  | 2.349210000  |
| H  | -3.078352000 | 2.356246000  | -1.092313000 |
| H  | 5.621295000  | 2.904359000  | -0.518717000 |
| H  | 9.371503000  | 0.774349000  | -0.538426000 |
| H  | 8.193353000  | -1.290192000 | 0.190121000  |
| H  | -4.744222000 | 4.183664000  | -1.288670000 |
| H  | 0.625032000  | 2.154379000  | 2.085972000  |
| H  | 1.722886000  | 3.483482000  | 1.669070000  |
| H  | 0.489227000  | 2.952441000  | 0.511374000  |
| H  | 8.089721000  | 2.879177000  | -0.864814000 |
| H  | 4.485438000  | -1.190145000 | -1.157680000 |
| Ag | -3.515669000 | -1.188586000 | -1.050135000 |

|                                              |                             |
|----------------------------------------------|-----------------------------|
| Zero-point correction=                       | 0.417012 (Hartree/Particle) |
| Thermal correction to Energy=                | 0.446901                    |
| Thermal correction to Enthalpy=              | 0.447845                    |
| Thermal correction to Gibbs Free Energy=     | 0.350766                    |
| Sum of electronic and zero-point Energies=   | -1538.311420                |
| Sum of electronic and thermal Energies=      | -1538.281531                |
| Sum of electronic and thermal Enthalpies=    | -1538.280586                |
| Sum of electronic and thermal Free Energies= | -1538.377666                |

CPCM (dichloromethane) M06/def2TZVP E = - 1539.6176797  
 CPCM (dichloromethane) M06L/def2TZVP E = - 1540.4872325  
 CPCM (dichloromethane) B3LYP/def2TZVP E = - 1540.6125072  
 CPCM (dichloromethane) B3LYP-d3/def2TZVP E = - 1540.6776084

**[(cationic-TS-9b)]**



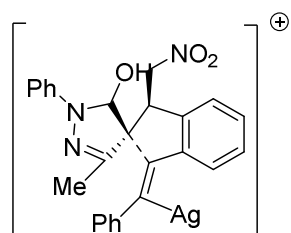

|   |              |              |              |
|---|--------------|--------------|--------------|
| C | -2.782950000 | 1.255922000  | -1.919104000 |
| C | 0.602521000  | -4.604193000 | 1.462862000  |
| C | -1.436263000 | -1.123392000 | 0.090851000  |
| C | 0.262872000  | -2.898874000 | -0.222471000 |
| C | -0.731012000 | -2.304383000 | 0.576730000  |
| C | -3.278855000 | 2.428576000  | -2.482378000 |
| C | -1.420467000 | 2.560373000  | -0.369779000 |
| C | -1.868470000 | 1.307644000  | -0.849434000 |
| C | 0.484297000  | 1.301078000  | 0.613386000  |
| C | 1.360231000  | 1.087788000  | -0.482544000 |
| C | -1.927637000 | 3.726867000  | -0.947550000 |
| C | -1.371721000 | 0.103797000  | -0.224896000 |
| C | 3.882623000  | -1.620496000 | -0.397317000 |
| C | 0.403332000  | 3.822903000  | 0.888595000  |
| C | -0.407698000 | 2.514130000  | 0.774029000  |
| C | -2.854890000 | 3.664718000  | -1.992602000 |
| C | -0.387017000 | -4.020191000 | 2.258615000  |
| C | 0.922943000  | -4.041633000 | 0.224427000  |
| C | 3.356224000  | -0.407447000 | -0.859966000 |
| C | -1.059980000 | -2.883255000 | 1.817014000  |
| C | 3.880848000  | 0.210185000  | -2.002052000 |
| C | 5.451425000  | -1.622401000 | -2.243395000 |
| C | 4.924161000  | -0.409675000 | -2.689622000 |
| C | 4.929903000  | -2.219627000 | -1.093702000 |
| O | 1.344737000  | 1.621473000  | -1.712093000 |
| O | 0.747874000  | 3.645238000  | 3.180909000  |
| O | 2.513541000  | 3.801644000  | 1.897459000  |
| N | 1.307700000  | 3.755890000  | 2.091743000  |
| N | 2.291091000  | 0.190044000  | -0.115036000 |
| N | 2.099995000  | -0.195879000 | 1.206863000  |
| C | 0.602591000  | 0.315279000  | 3.065960000  |
| C | 1.060163000  | 0.471285000  | 1.649867000  |
| H | 1.046315000  | 4.002748000  | 0.026910000  |
| H | -3.086244000 | 0.289640000  | -2.315040000 |
| H | -1.606605000 | 4.700831000  | -0.593816000 |
| H | -0.955700000 | 2.407530000  | 1.719278000  |
| H | 3.497890000  | 1.161611000  | -2.345592000 |
| H | 1.691269000  | -4.491126000 | -0.397470000 |
| H | -0.246088000 | 4.681726000  | 1.068940000  |
| H | -3.981333000 | 2.376813000  | -3.308280000 |
| H | 1.118479000  | -5.496079000 | 1.805202000  |
| H | -3.232260000 | 4.583638000  | -2.430303000 |
| H | 0.515163000  | -2.461554000 | -1.183402000 |
| H | -1.831152000 | -2.431901000 | 2.435918000  |
| H | 3.479756000  | -2.067029000 | 0.502638000  |
| H | 6.268278000  | -2.093281000 | -2.781780000 |
| H | 5.333087000  | 0.070956000  | -3.573278000 |
| H | -0.638429000 | -4.452814000 | 3.222286000  |

|    |              |              |              |
|----|--------------|--------------|--------------|
| H  | 1.175982000  | -0.480575000 | 3.546195000  |
| H  | 0.747833000  | 1.241707000  | 3.631898000  |
| H  | -0.462388000 | 0.060775000  | 3.113245000  |
| H  | 5.342243000  | -3.156436000 | -0.730557000 |
| Ag | -3.553417000 | -1.681749000 | -0.354507000 |
| H  | 0.510724000  | 2.107939000  | -1.839500000 |

|                                              |                             |
|----------------------------------------------|-----------------------------|
| Zero-point correction=                       | 0.416147 (Hartree/Particle) |
| Thermal correction to Energy=                | 0.445366                    |
| Thermal correction to Enthalpy=              | 0.446310                    |
| Thermal correction to Gibbs Free Energy=     | 0.350802                    |
| Sum of electronic and zero-point Energies=   | -1538.265866                |
| Sum of electronic and thermal Energies=      | -1538.236647                |
| Sum of electronic and thermal Enthalpies=    | -1538.235703                |
| Sum of electronic and thermal Free Energies= | -1538.331211                |

CPCM (dichloromethane) M06/def2TZVP E = - 1539.5930317  
 CPCM (dichloromethane) M06L/def2TZVP E = - 1540.462361  
 CPCM (dichloromethane) B3LYP/def2TZVP E = - 1540.5837117  
 CPCM (dichloromethane) B3LYP-d3/def2TZVP E = - 1540.6567148

**[(cationic-10b)]**

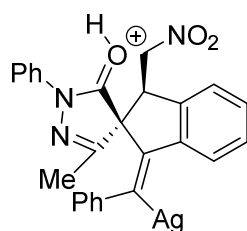

|   |              |              |              |
|---|--------------|--------------|--------------|
| C | -3.008294000 | 1.780849000  | -1.373637000 |
| C | 0.396963000  | -4.453687000 | 0.950223000  |
| C | -1.814993000 | -0.886374000 | 0.051378000  |
| C | -0.065799000 | -2.575412000 | -0.502288000 |
| C | -1.053343000 | -2.103036000 | 0.384938000  |
| C | -3.417295000 | 3.071512000  | -1.712266000 |
| C | -1.207017000 | 2.735239000  | -0.063722000 |
| C | -1.908247000 | 1.605751000  | -0.523486000 |
| C | 0.132231000  | 0.785322000  | 0.480073000  |
| C | 1.141146000  | 0.596874000  | -0.610064000 |
| C | -1.616768000 | 4.024997000  | -0.395830000 |
| C | -1.300262000 | 0.353654000  | -0.015899000 |
| C | 4.536301000  | -0.573328000 | -0.037393000 |
| C | 1.169408000  | 3.221642000  | 0.717025000  |
| C | -0.063286000 | 2.320018000  | 0.844029000  |
| C | -2.732597000 | 4.188807000  | -1.222394000 |
| C | -0.595562000 | -4.009078000 | 1.830205000  |
| C | 0.652073000  | -3.737955000 | -0.220610000 |
| C | 3.372591000  | -0.497994000 | -0.809050000 |
| C | -1.324935000 | -2.858101000 | 1.543682000  |
| C | 3.372709000  | -0.812971000 | -2.171911000 |
| C | 5.743941000  | -1.279582000 | -2.013593000 |
| C | 4.570835000  | -1.203485000 | -2.767908000 |
| C | 5.723101000  | -0.965408000 | -0.652418000 |

|    |              |              |              |
|----|--------------|--------------|--------------|
| O  | 1.067368000  | 1.050770000  | -1.844488000 |
| O  | 1.927438000  | 2.813979000  | 2.885835000  |
| O  | 3.355204000  | 2.571900000  | 1.246118000  |
| N  | 2.249402000  | 2.835404000  | 1.701409000  |
| N  | 2.164091000  | -0.088348000 | -0.157366000 |
| N  | 1.986929000  | -0.437599000 | 1.214478000  |
| C  | 0.345223000  | -0.140163000 | 2.978994000  |
| C  | 0.831562000  | 0.009523000  | 1.576709000  |
| H  | 1.630341000  | 3.207648000  | -0.270466000 |
| H  | -3.525922000 | 0.920278000  | -1.788192000 |
| H  | -1.090163000 | 4.899165000  | -0.023361000 |
| H  | -0.387052000 | 2.356267000  | 1.891317000  |
| H  | 2.463050000  | -0.763164000 | -2.757995000 |
| H  | 1.405952000  | -4.087822000 | -0.920116000 |
| H  | 0.900118000  | 4.247533000  | 0.979077000  |
| H  | -4.265754000 | 3.208440000  | -2.376010000 |
| H  | 0.953647000  | -5.359878000 | 1.168980000  |
| H  | -3.058091000 | 5.187584000  | -1.496088000 |
| H  | 0.111669000  | -2.042986000 | -1.433448000 |
| H  | -2.111092000 | -2.532263000 | 2.220649000  |
| H  | 4.504107000  | -0.322610000 | 1.015776000  |
| H  | 6.672606000  | -1.584811000 | -2.485900000 |
| H  | 4.582835000  | -1.453811000 | -3.824091000 |
| H  | -0.809005000 | -4.569076000 | 2.736222000  |
| H  | 0.871561000  | -0.962551000 | 3.467532000  |
| H  | 0.546836000  | 0.778893000  | 3.542592000  |
| H  | -0.730630000 | -0.330057000 | 2.999518000  |
| H  | 6.633468000  | -1.022423000 | -0.064170000 |
| Ag | -3.880575000 | -1.287677000 | -0.336296000 |
| H  | 0.207392000  | 1.501420000  | -1.974014000 |

Zero-point correction= 0.418592 (Hartree/Particle)  
 Thermal correction to Energy= 0.447179  
 Thermal correction to Enthalpy= 0.448124  
 Thermal correction to Gibbs Free Energy= 0.356071  
 Sum of electronic and zero-point Energies= -1538.290008  
 Sum of electronic and thermal Energies= -1538.261420  
 Sum of electronic and thermal Enthalpies= -1538.260476  
 Sum of electronic and thermal Free Energies= -1538.352528

CPCM (dichloromethane) M06/def2TZVP E = - 1539.6055944  
 CPCM (dichloromethane) M06L/def2TZVP E = - 1540.4702875  
 CPCM (dichloromethane) B3LYP/def2TZVP E = - 1540.5910602  
 CPCM (dichloromethane) B3LYP-d3/def2TZVP E = - 1540.6690051

*[(neutral-8a)]*

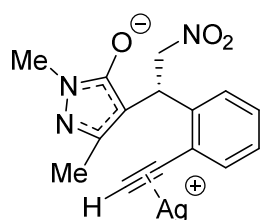

|    |              |              |              |
|----|--------------|--------------|--------------|
| O  | 4.065058000  | 1.981467000  | 0.743951000  |
| O  | 4.234448000  | 1.666269000  | -1.406314000 |
| O  | -0.477668000 | 2.909546000  | -0.910984000 |
| N  | -2.121600000 | 1.804777000  | 0.314110000  |
| N  | -2.242435000 | 0.768161000  | 1.222453000  |
| N  | 3.584111000  | 1.799280000  | -0.375362000 |
| C  | -0.943748000 | 0.362053000  | 1.445118000  |
| C  | -0.807965000 | 2.037971000  | -0.088247000 |
| C  | 2.821464000  | -3.246287000 | -0.151596000 |
| C  | 1.186563000  | -1.484635000 | -0.589440000 |
| C  | 0.005517000  | -1.159541000 | -1.323322000 |
| C  | 3.009329000  | -1.098174000 | 0.944194000  |
| C  | 1.679958000  | -2.793997000 | -0.800635000 |
| C  | 3.486811000  | -2.392078000 | 0.728176000  |
| C  | 1.866501000  | -0.608884000 | 0.301774000  |
| C  | 1.452871000  | 0.845057000  | 0.569433000  |
| C  | 2.082140000  | 1.775951000  | -0.493940000 |
| C  | -0.693546000 | -0.694357000 | 2.484863000  |
| C  | -1.028033000 | -1.101811000 | -1.990706000 |
| C  | -0.036933000 | 1.061659000  | 0.662661000  |
| C  | -3.275959000 | 2.536552000  | -0.135619000 |
| H  | 1.864982000  | 1.474822000  | -1.516365000 |
| H  | 3.542191000  | -0.441224000 | 1.624569000  |
| H  | 4.376278000  | -2.729964000 | 1.252426000  |
| H  | -1.642796000 | -1.007753000 | 2.931009000  |
| H  | -3.818026000 | 2.974463000  | 0.709179000  |
| H  | 1.743570000  | 2.803598000  | -0.355217000 |
| H  | 1.926919000  | 1.128768000  | 1.517576000  |
| H  | -3.966778000 | 1.888541000  | -0.696810000 |
| H  | -0.184842000 | -1.576511000 | 2.081079000  |
| H  | 1.144725000  | -3.443594000 | -1.486170000 |
| H  | 3.183309000  | -4.254952000 | -0.326711000 |
| H  | -0.058896000 | -0.300218000 | 3.288730000  |
| H  | -2.909058000 | 3.326281000  | -0.794545000 |
| H  | -1.595284000 | -0.961347000 | -2.889426000 |
| Ag | -2.671305000 | -0.982586000 | -0.218239000 |

|                                              |                             |
|----------------------------------------------|-----------------------------|
| Zero-point correction=                       | 0.269554 (Hartree/Particle) |
| Thermal correction to Energy=                | 0.291182                    |
| Thermal correction to Enthalpy=              | 0.292126                    |
| Thermal correction to Gibbs Free Energy=     | 0.216447                    |
| Sum of electronic and zero-point Energies=   | -1115.251577                |
| Sum of electronic and thermal Energies=      | -1115.229949                |
| Sum of electronic and thermal Enthalpies=    | -1115.229005                |
| Sum of electronic and thermal Free Energies= | -1115.304684                |

CPCM (dichloromethane) M06/def2TZVP E = - 1116.5592186  
 CPCM (dichloromethane) M06L/def2TZVP E = - 1117.1468242  
 CPCM (dichloromethane) B3LYP/def2TZVP E = - 1117.2120653  
 CPCM (dichloromethane) B3LYP-d3/def2TZVP E = - 1117.2606859

*[(neutral-TS-9a)]*

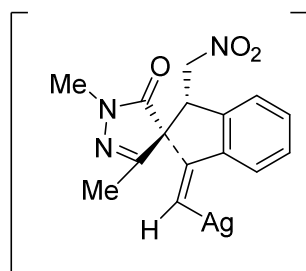

|    |              |              |              |
|----|--------------|--------------|--------------|
| O  | 4.821885000  | -1.034124000 | 0.091107000  |
| O  | 4.092396000  | -0.487378000 | -1.891100000 |
| O  | 1.382392000  | -0.259555000 | 2.341312000  |
| N  | 0.555148000  | -2.206141000 | 1.325271000  |
| N  | 0.452323000  | -2.723282000 | 0.058914000  |
| N  | 4.137871000  | -0.359835000 | -0.667296000 |
| C  | 0.903862000  | -1.785838000 | -0.778897000 |
| C  | 1.089255000  | -0.917849000 | 1.337830000  |
| C  | -0.522133000 | 4.115781000  | 0.642362000  |
| C  | -0.345057000 | 1.733414000  | 0.126258000  |
| C  | -1.058408000 | 0.501604000  | -0.028966000 |
| C  | 1.589696000  | 3.165729000  | -0.043400000 |
| C  | -1.101159000 | 2.857832000  | 0.527403000  |
| C  | 0.830616000  | 4.270542000  | 0.345068000  |
| C  | 1.037318000  | 1.886485000  | -0.147683000 |
| C  | 1.853381000  | 0.665855000  | -0.574473000 |
| C  | 3.308538000  | 0.747344000  | -0.063597000 |
| C  | 0.913645000  | -2.041412000 | -2.255160000 |
| C  | -1.685370000 | -0.581023000 | -0.165279000 |
| C  | 1.209844000  | -0.594565000 | -0.089372000 |
| C  | 0.302784000  | -3.026087000 | 2.485881000  |
| H  | 3.816611000  | 1.660774000  | -0.381348000 |
| H  | 2.642355000  | 3.316358000  | -0.258184000 |
| H  | 1.303544000  | 5.245104000  | 0.425622000  |
| H  | 0.648465000  | -3.084407000 | -2.448862000 |
| H  | 0.960358000  | -3.902513000 | 2.498332000  |
| H  | 3.359883000  | 0.630891000  | 1.017721000  |
| H  | 1.900285000  | 0.647202000  | -1.670932000 |
| H  | -0.739282000 | -3.364612000 | 2.507035000  |
| H  | 0.194361000  | -1.398047000 | -2.779963000 |
| H  | -2.156302000 | 2.724330000  | 0.748289000  |
| H  | -1.121070000 | 4.964013000  | 0.960157000  |
| H  | 1.903828000  | -1.846832000 | -2.682147000 |
| H  | 0.504376000  | -2.405661000 | 3.361743000  |
| H  | -1.421558000 | -1.641603000 | -0.188345000 |
| Ag | -3.832925000 | -0.345928000 | -0.390760000 |

|                                              |                             |
|----------------------------------------------|-----------------------------|
| Zero-point correction=                       | 0.269105 (Hartree/Particle) |
| Thermal correction to Energy=                | 0.290012                    |
| Thermal correction to Enthalpy=              | 0.290957                    |
| Thermal correction to Gibbs Free Energy=     | 0.216254                    |
| Sum of electronic and zero-point Energies=   | -1115.220605                |
| Sum of electronic and thermal Energies=      | -1115.199697                |
| Sum of electronic and thermal Enthalpies=    | -1115.198753                |
| Sum of electronic and thermal Free Energies= | -1115.273456                |

CPCM (dichloromethane) M06/def2TZVP E = - 1116.5315079  
 CPCM (dichloromethane) M06L/def2TZVP E = - 1117.1217765  
 CPCM (dichloromethane) B3LYP/def2TZVP E = - 1117.1905045  
 CPCM (dichloromethane) B3LYP-d3/def2TZVP E = - 1117.2357831

*[(neutral-10a)]*

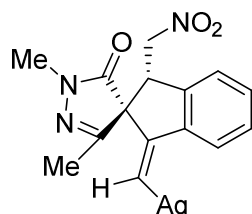

|    |              |              |              |
|----|--------------|--------------|--------------|
| O  | -4.446339000 | 1.064018000  | -1.971187000 |
| O  | -4.049813000 | 0.100851000  | -0.055383000 |
| O  | -1.624015000 | -1.432644000 | -1.656604000 |
| N  | -1.909259000 | -2.355274000 | 0.447715000  |
| N  | -1.694630000 | -2.013489000 | 1.783952000  |
| N  | -3.724114000 | 0.786800000  | -1.022539000 |
| C  | -1.139312000 | -0.851724000 | 1.814107000  |
| C  | -1.518413000 | -1.387968000 | -0.437776000 |
| C  | 2.060752000  | 3.473187000  | 0.285417000  |
| C  | 0.863778000  | 1.378279000  | 0.203830000  |
| C  | 0.615219000  | -0.075801000 | 0.151636000  |
| C  | -0.362163000 | 3.476675000  | 0.345306000  |
| C  | 2.073721000  | 2.081251000  | 0.215358000  |
| C  | 0.848714000  | 4.172296000  | 0.350798000  |
| C  | -0.345806000 | 2.084212000  | 0.273330000  |
| C  | -1.544401000 | 1.152712000  | 0.239155000  |
| C  | -2.322330000 | 1.354266000  | -1.065459000 |
| C  | -0.748276000 | -0.204534000 | 3.102005000  |
| C  | 1.454310000  | -1.095035000 | -0.067596000 |
| C  | -0.904761000 | -0.272502000 | 0.428562000  |
| C  | -2.639594000 | -3.558744000 | 0.122783000  |
| H  | -2.459594000 | 2.413470000  | -1.292248000 |
| H  | -1.303567000 | 4.018737000  | 0.403708000  |
| H  | 0.850705000  | 5.256905000  | 0.413557000  |
| H  | -1.032716000 | -0.847470000 | 3.938710000  |
| H  | -3.655684000 | -3.514569000 | 0.529518000  |
| H  | -1.849275000 | 0.862598000  | -1.917122000 |
| H  | -2.231234000 | 1.361795000  | 1.065597000  |
| H  | -2.128183000 | -4.438046000 | 0.527262000  |
| H  | 0.334133000  | -0.030295000 | 3.137634000  |
| H  | 3.018867000  | 1.544575000  | 0.184265000  |
| H  | 2.999579000  | 4.020477000  | 0.299963000  |
| H  | -1.235976000 | 0.770711000  | 3.226882000  |
| H  | -2.684236000 | -3.623054000 | -0.965932000 |
| H  | 1.060905000  | -2.109438000 | -0.062362000 |
| Ag | 3.494149000  | -1.038934000 | -0.516099000 |

Zero-point correction= 0.272594 (Hartree/Particle)  
 Thermal correction to Energy= 0.293109

Thermal correction to Enthalpy= 0.294054  
 Thermal correction to Gibbs Free Energy= 0.220185  
 Sum of electronic and zero-point Energies= -1115.288601  
 Sum of electronic and thermal Energies= -1115.268085  
 Sum of electronic and thermal Enthalpies= -1115.267141  
 Sum of electronic and thermal Free Energies= -1115.341010

CPCM (dichloromethane) M06/def2TZVP E = - 1116.5909064  
 CPCM (dichloromethane) M06L/def2TZVP E = - 1117.1750856  
 CPCM (dichloromethane) B3LYP/def2TZVP E = - 1117.2479789  
 CPCM (dichloromethane) B3LYP-d3/def2TZVP E = - 1117.294276

*[(neutral -8b)]*

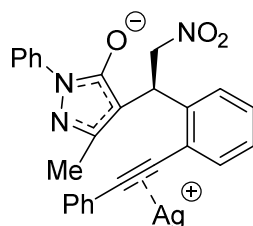

|   |              |              |              |
|---|--------------|--------------|--------------|
| C | 3.331041000  | 1.878234000  | 1.552023000  |
| C | -3.762005000 | 3.719994000  | 0.588512000  |
| C | 0.067845000  | 1.911090000  | 0.627051000  |
| C | -2.368849000 | 1.775535000  | 0.954040000  |
| C | -1.226896000 | 2.528958000  | 0.614628000  |
| C | 4.648093000  | 1.596865000  | 1.889389000  |
| C | 2.954988000  | -0.442855000 | 0.876538000  |
| C | 2.469101000  | 0.878667000  | 1.045469000  |
| C | 0.686833000  | -1.722132000 | 0.651501000  |
| C | -0.409867000 | -1.611056000 | -0.224913000 |
| C | 4.288797000  | -0.693320000 | 1.232526000  |
| C | 1.135747000  | 1.314795000  | 0.744020000  |
| C | -3.306751000 | -1.792136000 | -1.155280000 |
| C | 2.431050000  | -1.951559000 | -1.192172000 |
| C | 2.157843000  | -1.646440000 | 0.336509000  |
| C | 5.132673000  | 0.298520000  | 1.726031000  |
| C | -2.632132000 | 4.475221000  | 0.260072000  |
| C | -3.626238000 | 2.373161000  | 0.935779000  |
| C | -2.902070000 | -1.844573000 | 0.189199000  |
| C | -1.369754000 | 3.887897000  | 0.269545000  |
| C | -3.874305000 | -1.872625000 | 1.204289000  |
| C | -5.636371000 | -1.776206000 | -0.460479000 |
| C | -5.227533000 | -1.839380000 | 0.874143000  |
| C | -4.667124000 | -1.755221000 | -1.464281000 |
| O | -0.464160000 | -1.310292000 | -1.491291000 |
| O | 4.431154000  | -1.155890000 | -2.106851000 |
| O | 2.714739000  | 0.163017000  | -2.207446000 |
| N | 3.256625000  | -0.910315000 | -1.886739000 |
| N | -1.535898000 | -1.871975000 | 0.554299000  |
| N | -1.199307000 | -2.129758000 | 1.867926000  |
| C | 0.836601000  | -2.301811000 | 3.207069000  |
| C | 0.121523000  | -2.047050000 | 1.914309000  |
| H | 3.001082000  | -2.870727000 | -1.309509000 |
| H | 2.937042000  | 2.882046000  | 1.676071000  |

|    |              |              |              |
|----|--------------|--------------|--------------|
| H  | 4.674232000  | -1.703211000 | 1.115342000  |
| H  | 2.623608000  | -2.497379000 | 0.849500000  |
| H  | -3.548861000 | -1.933074000 | 2.235236000  |
| H  | -4.499059000 | 1.778026000  | 1.187328000  |
| H  | 1.485620000  | -1.994173000 | -1.737894000 |
| H  | 5.287982000  | 2.382930000  | 2.279448000  |
| H  | -4.745584000 | 4.181211000  | 0.573225000  |
| H  | 6.159432000  | 0.056394000  | 1.984919000  |
| H  | -2.259135000 | 0.732281000  | 1.228209000  |
| H  | -0.489052000 | 4.469769000  | 0.013498000  |
| H  | -2.557123000 | -1.783591000 | -1.934463000 |
| H  | -6.692930000 | -1.750856000 | -0.713065000 |
| H  | -5.967142000 | -1.866909000 | 1.670751000  |
| H  | -2.735171000 | 5.523489000  | -0.006070000 |
| H  | 1.542036000  | -3.139800000 | 3.120944000  |
| H  | 1.414233000  | -1.427753000 | 3.533323000  |
| H  | 0.109560000  | -2.547985000 | 3.985710000  |
| H  | -4.967019000 | -1.717439000 | -2.508731000 |
| Ag | 0.353383000  | 0.765553000  | -1.653629000 |

Zero-point correction= 0.405249 (Hartree/Particle)  
 Thermal correction to Energy= 0.434273  
 Thermal correction to Enthalpy= 0.435217  
 Thermal correction to Gibbs Free Energy= 0.341662  
 Sum of electronic and zero-point Energies= -1537.927612  
 Sum of electronic and thermal Energies= -1537.898587  
 Sum of electronic and thermal Enthalpies= -1537.897643  
 Sum of electronic and thermal Free Energies= -1537.991199

CPCM (dichloromethane) M06/def2TZVP E = - 1539.1799649  
 CPCM (dichloromethane) M06L/def2TZVP E = - 1540.0475638  
 CPCM (dichloromethane) B3LYP/def2TZVP E = - 1540.1675198  
 CPCM (dichloromethane) B3LYP-d3/def2TZVP E = - 1540.2389857

**[(neutral -TS-9b)]**

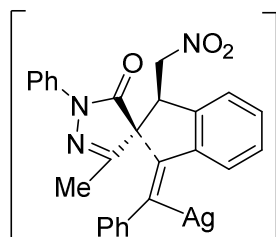

|   |              |              |              |
|---|--------------|--------------|--------------|
| C | 2.537695000  | -1.665453000 | -2.118402000 |
| C | 0.064481000  | 4.684990000  | 1.714161000  |
| C | 1.418319000  | 1.027641000  | 0.084414000  |
| C | -0.247064000 | 2.818484000  | 0.206471000  |
| C | 0.976848000  | 2.268287000  | 0.637919000  |
| C | 2.597135000  | -2.953536000 | -2.637408000 |
| C | 1.076212000  | -2.415448000 | -0.301165000 |
| C | 1.793067000  | -1.381972000 | -0.959508000 |
| C | -0.815188000 | -1.095459000 | 0.747794000  |
| C | -1.673871000 | -1.108983000 | -0.422204000 |
| C | 1.144511000  | -3.697563000 | -0.853438000 |



|    |              |              |              |
|----|--------------|--------------|--------------|
| C  | 1.718466000  | -0.031673000 | -0.473824000 |
| C  | -4.563967000 | 1.346500000  | -0.461512000 |
| C  | -0.263157000 | -3.399897000 | 1.618420000  |
| C  | 0.282988000  | -2.101586000 | 0.973360000  |
| C  | 1.892836000  | -3.971951000 | -1.999197000 |
| C  | 1.280232000  | 4.144368000  | 2.146816000  |
| C  | -0.695742000 | 4.020345000  | 0.749813000  |
| C  | -3.670868000 | 0.391912000  | -0.977260000 |
| C  | 1.734558000  | 2.939946000  | 1.619679000  |
| C  | -3.843888000 | -0.087967000 | -2.286622000 |
| C  | -5.790372000 | 1.342481000  | -2.553875000 |
| C  | -4.901819000 | 0.391639000  | -3.058546000 |
| C  | -5.611658000 | 1.813827000  | -1.250828000 |
| O  | -1.656152000 | -1.844911000 | -1.416474000 |
| O  | 0.073913000  | -2.716670000 | 3.818598000  |
| O  | -1.954531000 | -3.274984000 | 3.235212000  |
| N  | -0.762673000 | -3.111131000 | 3.005920000  |
| N  | -2.603581000 | -0.059857000 | -0.168109000 |
| N  | -2.398523000 | 0.505066000  | 1.057088000  |
| C  | -0.908486000 | 0.294450000  | 2.980241000  |
| C  | -1.349878000 | -0.120526000 | 1.607815000  |
| H  | -1.103439000 | -3.816637000 | 1.065141000  |
| H  | 3.057670000  | -0.851113000 | -2.618395000 |
| H  | 0.587402000  | -4.511259000 | -0.403752000 |
| H  | 0.989240000  | -1.687109000 | 1.704753000  |
| H  | -3.160202000 | -0.830073000 | -2.675498000 |
| H  | -1.644196000 | 4.433021000  | 0.419862000  |
| H  | 0.527510000  | -4.141552000 | 1.755866000  |
| H  | 3.174211000  | -3.153955000 | -3.534971000 |
| H  | -0.289576000 | 5.623135000  | 2.132209000  |
| H  | 1.911286000  | -4.982989000 | -2.395996000 |
| H  | -0.835324000 | 2.296655000  | -0.539327000 |
| H  | 2.670052000  | 2.506796000  | 1.962051000  |
| H  | -4.423981000 | 1.702067000  | 0.551639000  |
| H  | -6.611249000 | 1.708805000  | -3.164265000 |
| H  | -5.027686000 | 0.012273000  | -4.069559000 |
| H  | 1.870021000  | 4.659989000  | 2.899100000  |
| H  | -1.377061000 | 1.248566000  | 3.235773000  |
| H  | -1.192816000 | -0.442432000 | 3.739351000  |
| H  | 0.179638000  | 0.412990000  | 3.036046000  |
| H  | -6.297142000 | 2.550285000  | -0.838630000 |
| Ag | 3.841594000  | 1.231902000  | -0.915385000 |

|                                              |                             |
|----------------------------------------------|-----------------------------|
| Zero-point correction=                       | 0.403343 (Hartree/Particle) |
| Thermal correction to Energy=                | 0.432512                    |
| Thermal correction to Enthalpy=              | 0.433456                    |
| Thermal correction to Gibbs Free Energy=     | 0.337140                    |
| Sum of electronic and zero-point Energies=   | -1537.871091                |
| Sum of electronic and thermal Energies=      | -1537.841922                |
| Sum of electronic and thermal Enthalpies=    | -1537.840978                |
| Sum of electronic and thermal Free Energies= | -1537.937294                |

CPCM (dichloromethane) M06/def2TZVP E = - 1539.155532  
 CPCM (dichloromethane) M06L/def2TZVP E = - 1540.0209546  
 CPCM (dichloromethane) B3LYP/def2TZVP E = - 1540.1420325  
 CPCM (dichloromethane) B3LYP-d3/def2TZVP E = - 1540.2115123

*[(neutral-10b)]*

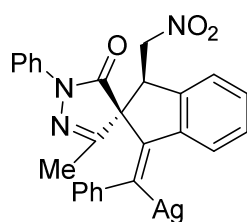

|   |              |              |              |
|---|--------------|--------------|--------------|
| C | -3.376390000 | 1.398913000  | -1.184966000 |
| C | 1.045934000  | -4.309651000 | 0.732761000  |
| C | -1.648043000 | -1.035984000 | 0.042635000  |
| C | 0.284708000  | -2.462983000 | -0.635434000 |
| C | -0.717652000 | -2.148845000 | 0.304067000  |
| C | -4.014109000 | 2.604476000  | -1.477577000 |
| C | -1.611655000 | 2.627761000  | -0.082935000 |
| C | -2.179622000 | 1.402217000  | -0.459362000 |
| C | 0.028067000  | 0.894004000  | 0.418897000  |
| C | 1.098390000  | 0.721334000  | -0.677226000 |
| C | -2.248773000 | 3.833439000  | -0.365958000 |
| C | -1.333957000 | 0.270860000  | -0.023158000 |
| C | 4.329140000  | -0.980269000 | 0.212858000  |
| C | 0.763832000  | 3.426379000  | 0.287430000  |
| C | -0.315484000 | 2.415943000  | 0.673325000  |
| C | -3.460257000 | 3.819273000  | -1.062543000 |
| C | 0.043879000  | -4.021732000 | 1.665600000  |
| C | 1.157499000  | -3.529777000 | -0.419195000 |
| C | 3.406621000  | -0.310265000 | -0.605378000 |
| C | -0.834998000 | -2.964713000 | 1.447561000  |
| C | 3.711728000  | -0.069011000 | -1.954576000 |
| C | 5.857302000  | -1.169880000 | -1.660653000 |
| C | 4.934364000  | -0.502907000 | -2.466979000 |
| C | 5.544867000  | -1.403167000 | -0.319953000 |
| O | 1.016744000  | 1.073424000  | -1.845289000 |
| O | 1.702557000  | 3.249240000  | 2.439135000  |
| O | 3.036401000  | 3.683537000  | 0.768438000  |
| N | 1.937295000  | 3.436430000  | 1.246512000  |
| N | 2.171920000  | 0.113889000  | -0.049415000 |
| N | 1.920795000  | -0.152050000 | 1.305067000  |
| C | 0.191012000  | 0.138707000  | 2.978395000  |
| C | 0.733833000  | 0.251228000  | 1.591413000  |
| H | 1.178510000  | 3.267415000  | -0.706650000 |
| H | -3.792977000 | 0.465143000  | -1.553581000 |
| H | -1.818337000 | 4.782462000  | -0.056003000 |
| H | -0.498651000 | 2.545408000  | 1.746357000  |
| H | 3.000816000  | 0.449600000  | -2.582239000 |
| H | 1.928324000  | -3.747399000 | -1.153322000 |
| H | 0.369099000  | 4.444827000  | 0.349429000  |
| H | -4.938348000 | 2.598765000  | -2.049129000 |
| H | 1.726207000  | -5.140106000 | 0.900069000  |
| H | -3.960665000 | 4.754538000  | -1.297127000 |
| H | 0.369579000  | -1.867449000 | -1.539691000 |
| H | -1.624558000 | -2.757147000 | 2.166192000  |
| H | 4.084367000  | -1.158968000 | 1.251627000  |
| H | 6.807597000  | -1.501207000 | -2.069889000 |
| H | 5.162492000  | -0.310722000 | -3.512125000 |

|    |              |              |              |
|----|--------------|--------------|--------------|
| H  | -0.055186000 | -4.627731000 | 2.562631000  |
| H  | 0.835739000  | -0.511376000 | 3.574482000  |
| H  | 0.155979000  | 1.123520000  | 3.460667000  |
| H  | -0.824886000 | -0.269438000 | 2.966700000  |
| H  | 6.252404000  | -1.919086000 | 0.323898000  |
| Ag | -3.637332000 | -1.741077000 | -0.275532000 |

|                                              |                             |
|----------------------------------------------|-----------------------------|
| Zero-point correction=                       | 0.406390 (Hartree/Particle) |
| Thermal correction to Energy=                | 0.434689                    |
| Thermal correction to Enthalpy=              | 0.435633                    |
| Thermal correction to Gibbs Free Energy=     | 0.342883                    |
| Sum of electronic and zero-point Energies=   | -1537.935862                |
| Sum of electronic and thermal Energies=      | -1537.907563                |
| Sum of electronic and thermal Enthalpies=    | -1537.906619                |
| Sum of electronic and thermal Free Energies= | -1537.999369                |

CPCM (dichloromethane) M06/def2TZVP E = - 1539.1997864  
 CPCM (dichloromethane) M06L/def2TZVP E = - 1540.0601275  
 CPCM (dichloromethane) B3LYP/def2TZVP E = - 1540.183928  
 CPCM (dichloromethane) B3LYP-d3/def2TZVP E = - 1540.2582085

***[(endo-neutral-TS-9b)]***

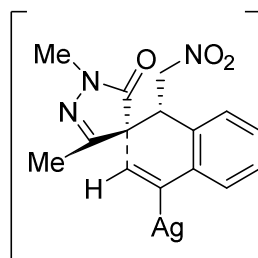

|   |              |              |              |
|---|--------------|--------------|--------------|
| C | 1.411023000  | 1.191239000  | -0.405245000 |
| C | 1.293294000  | 0.059989000  | 0.061126000  |
| C | 0.678877000  | -1.111125000 | 0.616244000  |
| C | -0.719364000 | -1.284799000 | 0.434102000  |
| C | -1.507058000 | -0.308109000 | -0.449746000 |
| C | -1.323639000 | 1.142758000  | -0.089220000 |
| H | 2.492709000  | -1.847603000 | 1.507944000  |
| H | 1.531916000  | 2.196984000  | -0.746841000 |
| C | 1.427813000  | -2.022433000 | 1.375634000  |
| C | -1.305916000 | -2.397151000 | 1.043577000  |
| C | -0.555806000 | -3.303709000 | 1.797244000  |
| C | 0.815180000  | -3.121860000 | 1.966365000  |
| H | -2.368357000 | -2.582492000 | 0.939289000  |
| H | -1.054496000 | -4.154131000 | 2.253268000  |
| H | 1.399808000  | -3.821556000 | 2.555630000  |
| H | -1.151212000 | -0.445485000 | -1.480025000 |
| C | -3.021877000 | -0.595650000 | -0.495710000 |
| N | -3.370272000 | -1.859390000 | -1.256578000 |
| O | -4.188036000 | -2.621866000 | -0.748104000 |
| O | -2.833651000 | -2.018506000 | -2.348919000 |
| C | -1.300815000 | 1.678584000  | 1.266872000  |
| O | -1.325834000 | 1.121652000  | 2.371912000  |
| N | -1.250767000 | 3.066928000  | 1.058936000  |
| N | -1.331771000 | 3.413033000  | -0.254281000 |

|    |              |              |              |
|----|--------------|--------------|--------------|
| C  | -1.390858000 | 2.267259000  | -0.941949000 |
| C  | -1.274049000 | 4.067154000  | 2.099561000  |
| H  | -2.192918000 | 4.662626000  | 2.051892000  |
| H  | -1.232321000 | 3.534754000  | 3.052164000  |
| H  | -0.413343000 | 4.739620000  | 2.013970000  |
| C  | -1.472990000 | 2.302909000  | -2.439730000 |
| H  | -1.493103000 | 3.342357000  | -2.778770000 |
| H  | -0.615889000 | 1.801566000  | -2.910199000 |
| H  | -2.374997000 | 1.804171000  | -2.817789000 |
| H  | -3.475502000 | -0.682325000 | 0.490628000  |
| H  | -3.519757000 | 0.198782000  | -1.055739000 |
| Ag | 3.667966000  | -0.092167000 | -0.620124000 |

Zero-point correction= 0.268192 (Hartree/Particle)  
 Thermal correction to Energy= 0.289826  
 Thermal correction to Enthalpy= 0.290770  
 Thermal correction to Gibbs Free Energy= 0.213605  
 Sum of electronic and zero-point Energies= -1115.206153  
 Sum of electronic and thermal Energies= -1115.184520  
 Sum of electronic and thermal Enthalpies= -1115.183576  
 Sum of electronic and thermal Free Energies= -1115.260740

CPCM (dichloromethane) M06/def2TZVP E = - 1116.5278269  
 CPCM (dichloromethane) M06L/def2TZVP E = - 1117.1148129  
 CPCM (dichloromethane) B3LYP/def2TZVP E = - 1117.1835713  
 CPCM (dichloromethane) B3LYP-d3/def2TZVP E = - 1117.2285095

**[(endo-10b)]**

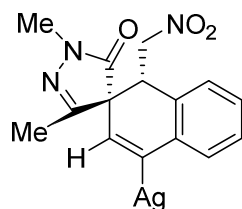

|   |              |              |              |
|---|--------------|--------------|--------------|
| C | -0.640195000 | -1.179011000 | -0.334682000 |
| C | -1.539922000 | -0.201121000 | -0.147382000 |
| C | -1.131172000 | 1.144203000  | 0.286651000  |
| C | 0.237691000  | 1.509310000  | 0.221231000  |
| C | 1.221096000  | 0.525486000  | -0.403907000 |
| C | 0.855922000  | -0.955488000 | -0.106680000 |
| H | -3.099619000 | 1.787808000  | 0.843176000  |
| H | -0.928503000 | -2.191010000 | -0.602534000 |
| C | -2.050697000 | 2.073219000  | 0.789615000  |
| C | 0.627827000  | 2.778003000  | 0.651416000  |
| C | -0.305756000 | 3.688958000  | 1.156646000  |
| C | -1.650074000 | 3.334900000  | 1.227410000  |
| H | 1.668245000  | 3.082789000  | 0.598331000  |
| H | 0.025568000  | 4.669025000  | 1.487978000  |
| H | -2.384753000 | 4.033837000  | 1.617560000  |
| H | 1.138292000  | 0.630278000  | -1.494764000 |
| C | 2.694443000  | 0.791113000  | -0.053596000 |
| N | 3.323711000  | 1.822508000  | -0.964105000 |
| O | 3.943315000  | 2.742938000  | -0.440773000 |

|    |              |              |              |
|----|--------------|--------------|--------------|
| O  | 3.203477000  | 1.645265000  | -2.174011000 |
| C  | 1.241513000  | -1.405643000 | 1.327742000  |
| O  | 0.914517000  | -0.920977000 | 2.397314000  |
| N  | 2.057952000  | -2.498640000 | 1.140967000  |
| N  | 2.314323000  | -2.790998000 | -0.197898000 |
| C  | 1.676586000  | -1.937132000 | -0.925504000 |
| C  | 2.669632000  | -3.292089000 | 2.182505000  |
| H  | 3.762236000  | -3.237777000 | 2.123983000  |
| H  | 2.331727000  | -2.881512000 | 3.135995000  |
| H  | 2.361230000  | -4.339702000 | 2.100759000  |
| C  | 1.757108000  | -1.961301000 | -2.417733000 |
| H  | 2.353548000  | -2.817489000 | -2.743081000 |
| H  | 0.757858000  | -2.028763000 | -2.865870000 |
| H  | 2.220561000  | -1.043284000 | -2.802307000 |
| H  | 2.842163000  | 1.141364000  | 0.966478000  |
| H  | 3.298830000  | -0.104271000 | -0.225801000 |
| Ag | -3.589229000 | -0.630843000 | -0.446283000 |

|                                              |                             |
|----------------------------------------------|-----------------------------|
| Zero-point correction=                       | 0.273450 (Hartree/Particle) |
| Thermal correction to Energy=                | 0.293802                    |
| Thermal correction to Enthalpy=              | 0.294747                    |
| Thermal correction to Gibbs Free Energy=     | 0.222123                    |
| Sum of electronic and zero-point Energies=   | -1115.286585                |
| Sum of electronic and thermal Energies=      | -1115.266233                |
| Sum of electronic and thermal Enthalpies=    | -1115.265289                |
| Sum of electronic and thermal Free Energies= | -1115.337912                |

CPCM (dichloromethane) M06/def2TZVP E = - 1116.589173  
 CPCM (dichloromethane) M06L/def2TZVP E = - 1117.1717061  
 CPCM (dichloromethane) B3LYP/def2TZVP E = - 1117.2463036  
 CPCM (dichloromethane) B3LYP-d3/def2TZVP E = - 1117.2917055

**[(endo-cationic-TS-9b)]**

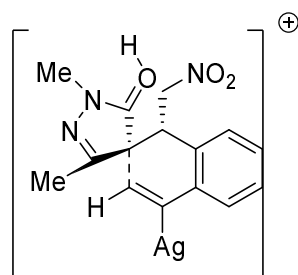

|   |              |              |              |
|---|--------------|--------------|--------------|
| C | 1.180842000  | 1.291526000  | -0.399426000 |
| C | 1.383115000  | 0.170716000  | 0.105049000  |
| C | 0.813926000  | -0.993956000 | 0.744813000  |
| C | -0.561707000 | -1.277447000 | 0.507303000  |
| C | -1.354348000 | -0.441880000 | -0.508208000 |
| C | -1.436228000 | 1.024181000  | -0.142248000 |
| H | 2.616874000  | -1.532421000 | 1.796277000  |
| H | 1.169759000  | 2.285633000  | -0.799942000 |
| C | 1.571202000  | -1.778003000 | 1.627192000  |
| C | -1.121465000 | -2.350749000 | 1.211414000  |
| C | -0.361861000 | -3.123348000 | 2.099064000  |
| C | 0.986982000  | -2.842834000 | 2.307333000  |
| H | -2.156885000 | -2.630496000 | 1.051413000  |

|    |              |              |              |
|----|--------------|--------------|--------------|
| H  | -0.833433000 | -3.952624000 | 2.617169000  |
| H  | 1.577478000  | -3.442417000 | 2.992288000  |
| H  | -0.818304000 | -0.513973000 | -1.462670000 |
| C  | -2.765599000 | -0.979603000 | -0.803302000 |
| N  | -2.719796000 | -2.336400000 | -1.476188000 |
| O  | -3.486287000 | -3.195447000 | -1.058357000 |
| O  | -1.924200000 | -2.463982000 | -2.401612000 |
| C  | -1.569454000 | 1.597656000  | 1.135059000  |
| O  | -1.532884000 | 1.080688000  | 2.375524000  |
| N  | -1.748414000 | 2.921431000  | 0.974700000  |
| N  | -1.759969000 | 3.275047000  | -0.349065000 |
| C  | -1.597862000 | 2.146870000  | -1.024719000 |
| C  | -1.910479000 | 3.936845000  | 2.004178000  |
| H  | -2.783544000 | 4.546574000  | 1.763431000  |
| H  | -2.055224000 | 3.441514000  | 2.964630000  |
| H  | -1.024495000 | 4.576933000  | 2.048622000  |
| C  | -1.605922000 | 2.153620000  | -2.524072000 |
| H  | -1.612169000 | 3.185584000  | -2.883379000 |
| H  | -0.733819000 | 1.639054000  | -2.946586000 |
| H  | -2.496222000 | 1.655048000  | -2.927413000 |
| H  | -3.401889000 | -1.083621000 | 0.075003000  |
| H  | -3.260878000 | -0.323488000 | -1.522375000 |
| Ag | 3.541848000  | 0.222128000  | -0.606321000 |
| H  | -1.416732000 | 0.116507000  | 2.323481000  |

Zero-point correction= 0.281442 (Hartree/Particle)  
 Thermal correction to Energy= 0.303170  
 Thermal correction to Enthalpy= 0.304114  
 Thermal correction to Gibbs Free Energy= 0.227427  
 Sum of electronic and zero-point Energies= -1115.601295  
 Sum of electronic and thermal Energies= -1115.579567  
 Sum of electronic and thermal Enthalpies= -1115.578623  
 Sum of electronic and thermal Free Energies= -1115.655309

CPCM (dichloromethane) M06/def2TZVP E = - 1116.9870542  
 CPCM (dichloromethane) M06L/def2TZVP E = - 1117.5773392  
 CPCM (dichloromethane) B3LYP/def2TZVP E = - 1117.6449185  
 CPCM (dichloromethane) B3LYP-d3/def2TZVP E = - 1117.692135

**[(endo-cation-10b)]**

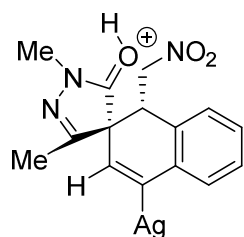

|   |              |              |              |
|---|--------------|--------------|--------------|
| C | -0.616706000 | -1.176330000 | -0.348058000 |
| C | -1.511922000 | -0.201800000 | -0.122123000 |
| C | -1.100295000 | 1.119642000  | 0.374264000  |
| C | 0.261727000  | 1.507223000  | 0.297927000  |
| C | 1.247812000  | 0.560278000  | -0.375098000 |
| C | 0.905237000  | -0.932757000 | -0.102050000 |
| H | -3.067790000 | 1.716026000  | 0.994680000  |

|    |              |              |              |
|----|--------------|--------------|--------------|
| H  | -0.875960000 | -2.176997000 | -0.675515000 |
| C  | -2.023251000 | 2.013653000  | 0.934231000  |
| C  | 0.645326000  | 2.767779000  | 0.757803000  |
| C  | -0.292409000 | 3.641864000  | 1.318294000  |
| C  | -1.628891000 | 3.261913000  | 1.413454000  |
| H  | 1.674986000  | 3.101214000  | 0.675137000  |
| H  | 0.028896000  | 4.617393000  | 1.670117000  |
| H  | -2.362619000 | 3.935300000  | 1.845710000  |
| H  | 1.123252000  | 0.660881000  | -1.461844000 |
| C  | 2.728797000  | 0.855025000  | -0.080027000 |
| N  | 3.288087000  | 1.882640000  | -1.045432000 |
| O  | 3.886134000  | 2.836039000  | -0.568707000 |
| O  | 3.121786000  | 1.652709000  | -2.240180000 |
| C  | 1.230748000  | -1.458906000 | 1.264937000  |
| O  | 0.802572000  | -0.901496000 | 2.371038000  |
| N  | 1.955015000  | -2.547968000 | 1.145905000  |
| N  | 2.268324000  | -2.841632000 | -0.213079000 |
| C  | 1.712473000  | -1.916332000 | -0.925012000 |
| C  | 2.450913000  | -3.483211000 | 2.149862000  |
| H  | 3.525305000  | -3.609803000 | 2.003539000  |
| H  | 2.266895000  | -3.098042000 | 3.155716000  |
| H  | 1.948879000  | -4.445864000 | 2.026451000  |
| C  | 1.847837000  | -1.880351000 | -2.407301000 |
| H  | 2.411468000  | -2.747781000 | -2.756441000 |
| H  | 0.859387000  | -1.871584000 | -2.881495000 |
| H  | 2.364267000  | -0.964417000 | -2.721912000 |
| H  | 2.908604000  | 1.239847000  | 0.922889000  |
| H  | 3.356525000  | -0.024172000 | -0.252358000 |
| Ag | -3.561615000 | -0.577508000 | -0.560358000 |
| H  | 1.025504000  | -1.404571000 | 3.176569000  |

|                                              |                             |
|----------------------------------------------|-----------------------------|
| Zero-point correction=                       | 0.285315 (Hartree/Particle) |
| Thermal correction to Energy=                | 0.305979                    |
| Thermal correction to Enthalpy=              | 0.306923                    |
| Thermal correction to Gibbs Free Energy=     | 0.233588                    |
| Sum of electronic and zero-point Energies=   | -1115.629411                |
| Sum of electronic and thermal Energies=      | -1115.608747                |
| Sum of electronic and thermal Enthalpies=    | -1115.607803                |
| Sum of electronic and thermal Free Energies= | -1115.681138                |

CPCM (dichloromethane) M06/def2TZVP E = - 1116.9967476  
 CPCM (dichloromethane) M06L/def2TZVP E = - 1117.5838045  
 CPCM (dichloromethane) B3LYP/def2TZVP E = - 1117.6559747  
 CPCM (dichloromethane) B3LYP-d3/def2TZVP E = - 1117.7023228

## 7.0 Crystal structures

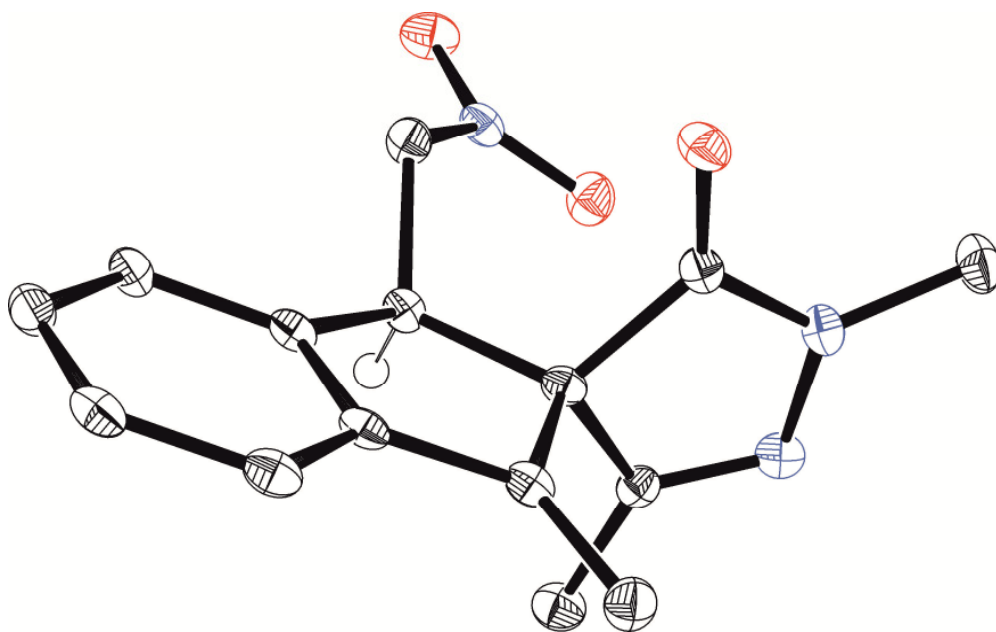

**Fig 6** X-ray crystal structure of (*R,R*)-**3h**.

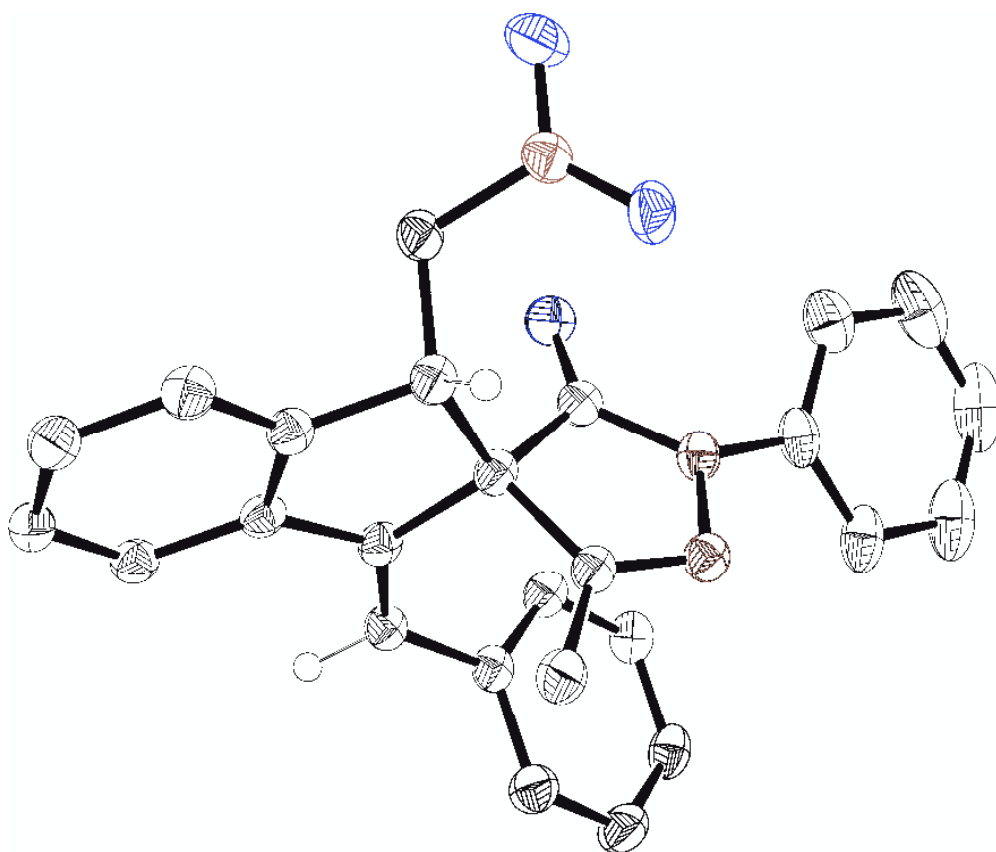

**Fig 7** X-ray crystal structure of (*S,S*)-**4a**. (taken from a racemic crystal)



## 8.0 Mechanism

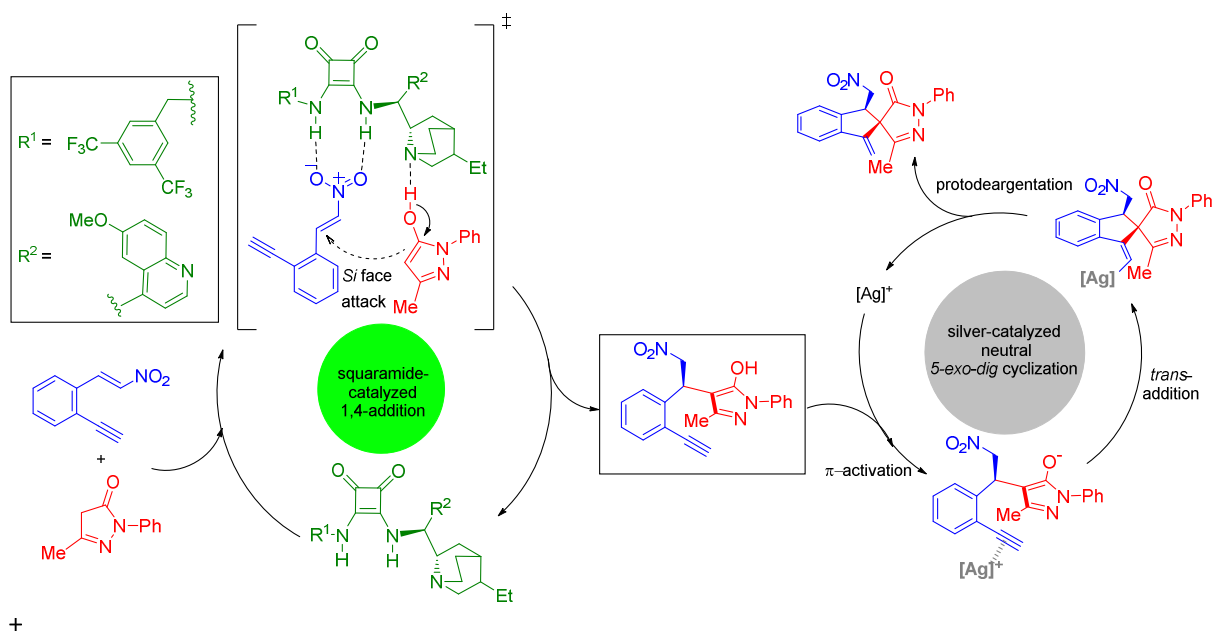

+

## 9.0 Analytical Data

### 1-Ethynyl-2-naphthaldehyde

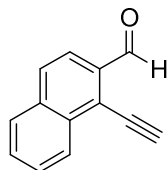

**1-Ethynyl-2-naphthaldehyde** was obtained after flash chromatography (SiO<sub>2</sub>, *n*-pentane/EtOAc 10:1 to pure CH<sub>2</sub>Cl<sub>2</sub>) as colorless solid (560 mg, 97%). **Molecular formula:** C<sub>13</sub>H<sub>8</sub>O. **Molecular mass:** 180.21 g mol<sup>-1</sup>. **R<sub>f</sub>** (*n*-pentane/Et<sub>2</sub>O 15:1) = 0.53. **Mp:** 135-138 °C. **<sup>1</sup>H NMR** (600 MHz, CDCl<sub>3</sub>): δ = 3.92 (s, 1 H, CH), 7.63-7.71 (m, 2 H, CH<sub>Ar</sub>), 7.87-7.91 (m, 2 H, CH<sub>Ar</sub>), 7.97 (d, *J* = 8.6 Hz, 1 H, CH<sub>Ar</sub>), 8.38-8.66 (m, 1 H, CH<sub>Ar</sub>), 10.78 (s, 1 H, CHO) ppm. **<sup>13</sup>C NMR** (151 MHz, CDCl<sub>3</sub>): δ = 77.3 (s), 90.2 (d), 122.0 (d), 126.2 (s), 127.2 (d), 128.0 (d), 128.6 (d), 129.6 (d, 2C), 132.5 (s), 135.4 (s), 135.8 (s), 192.0 (d) ppm. **IR** (ATR):  $\tilde{\nu}$  = 3965, 3884, 3421, 3344, 3242, 3056, 2846, 2740, 2462, 2316, 2094, 1994, 1918, 1823, 1670, 1575, 1436, 1370, 1320, 1222, 1143, 1020, 913, 867, 813, 761, 711, 679, 656 cm<sup>-1</sup>. **MS (EI<sup>+</sup>, 70 eV)** *m/z* (%): 180.9 (21), 179.8 (100) [M]<sup>+</sup> = [C<sub>13</sub>H<sub>8</sub>O]<sup>+</sup>, 152.9 (13), 151.8 (98), 150.9 (23), 149.9 (23). **MS (CI<sup>+</sup>, methane)** *m/z* (%): 208.9 (17) [M+C<sub>2</sub>H<sub>5</sub>]<sup>+</sup> = [C<sub>15</sub>H<sub>13</sub>O]<sup>+</sup>, 180.9 (100) [M+H]<sup>+</sup> = [C<sub>13</sub>H<sub>9</sub>O]<sup>+</sup>. **EA:** calc. for C<sub>13</sub>H<sub>8</sub>O: C 86.65%, H 4.47%; found: C 86.16%, H 4.47%.

### (*E*)-1-Ethynyl-2-(2-nitrovinyl)benzene (1a)

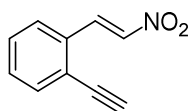

**1a** was obtained after flash chromatography (SiO<sub>2</sub>, *n*-pentane/Et<sub>2</sub>O 5:1 to pure Et<sub>2</sub>O) as yellow solid (1.75 g, 98%). **Molecular formula:** C<sub>10</sub>H<sub>7</sub>NO<sub>2</sub>. **Molecular mass:** 173.17 g mol<sup>-1</sup>. **R<sub>f</sub>** (*n*-pentane/Et<sub>2</sub>O 10:1) = 0.42. **Mp:** 88-91 °C. **<sup>1</sup>H NMR** (400 MHz, CDCl<sub>3</sub>): δ = 3.52 (s, 1 H, CH), 7.40-7.47 (m, 2 H, CH<sub>Ar</sub>), 7.57-7.63 (m, 2 H, CH<sub>Ar</sub>), 7.73 (d, *J* = 13.8 Hz, 1 H, CH<sub>ol</sub>), 8.46 (d, *J* = 13.8 Hz, 1 H, CH<sub>ol</sub>) ppm. **<sup>13</sup>C NMR** (101 MHz, CDCl<sub>3</sub>): δ = 80.7 (s), 85.0 (d), 124.2 (s), 127.6 (d), 129.6 (d), 131.6 (d), 132.1 (s), 134.3 (d), 136.9 (d), 138.7 (d) ppm. **IR** (ATR):  $\tilde{\nu}$  = 3838, 3461, 3280, 3108, 2923, 2832, 2660, 2327, 2102, 1725, 1625, 1497, 1332, 1278, 1207, 962, 838, 753 cm<sup>-1</sup>. **MS (EI<sup>+</sup>, 70 eV)** *m/z* (%): 172.9 (14) [M]<sup>+</sup> = [C<sub>10</sub>H<sub>7</sub>NO<sub>2</sub>]<sup>+</sup>, 127.9 (15), 126.9 (100) [M-NO<sub>2</sub>]<sup>+</sup> = [C<sub>10</sub>H<sub>7</sub>]<sup>+</sup>, 125.9 (33), 114.9 (33), 100.9 (15), 88.9 (9), 76.9 (27), 74.9 (23), 73.9 (15), 63.0 (14), 51.1 (18). **MS (CI<sup>+</sup>, methane)** *m/z* (%): 202.0 (28) [M+C<sub>2</sub>H<sub>5</sub>]<sup>+</sup> = [C<sub>12</sub>H<sub>12</sub>NO<sub>2</sub>]<sup>+</sup>, 173.9 (100) [M+H]<sup>+</sup> = [C<sub>10</sub>H<sub>8</sub>NO<sub>2</sub>]<sup>+</sup>. All analytical data is in accordance with the reported literature.<sup>1</sup>

**(E)-1-Ethynyl-4-methoxy-2-(2-nitrovinyl)benzene (1b)**

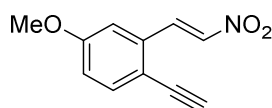

**1b** was obtained after flash chromatography (SiO<sub>2</sub>, *n*-pentane/Et<sub>2</sub>O 5:1 to pure Et<sub>2</sub>O) as yellow solid (1.54 g, 93%). **Molecular formular:** C<sub>11</sub>H<sub>9</sub>NO<sub>3</sub>. **Molecular mass:** 203.20 g mol<sup>-1</sup>. **R<sub>f</sub>** (*n*-pentane/Et<sub>2</sub>O 6:1) = 0.49. **Mp:** 98-101 °C. **<sup>1</sup>H NMR** (600 MHz, CDCl<sub>3</sub>, major diastereomer): δ = 3.43 (s, 1 H, CH), 3.86 (s, 3 H, OCH<sub>3</sub>), 6.98 (dd, *J* = 2.6 Hz, *J* = 8.6 Hz, 1 H, CH<sub>Ar</sub>), 7.03 (d, *J* = 2.6 Hz, 1 H, CH<sub>Ar</sub>), 7.53 (d, *J* = 8.6 Hz, 1 H, CH<sub>Ar</sub>), 7.70 53 (d, *J* = 13.8 Hz, 1 H, CH<sub>ol</sub>), 8.39 (dd, *J* = 1.4 Hz, *J* = 13.7 Hz, 1 H, CH<sub>ol</sub>) ppm. **<sup>13</sup>C NMR** (151 MHz, CDCl<sub>3</sub>, major diastereomer): δ = 55.7 (q), 80.7 (s), 83.3 (d), 112.4 (d), 116.5 (s), 118.6 (d), 133.4 (s), 135.3 (d), 136.9 (d), 138.8 (d), 160.1 (s) ppm. **IR** (ATR):  $\tilde{\nu}$  = 3958, 3876, 3837, 3767, 3699, 3596, 3458, 3266, 3097, 3023, 2950, 2841, 2699, 2578, 2464, 2355, 2283, 2194, 2162, 2104, 1955, 1938, 1901, 1857, 1813, 1774, 1718, 1676, 1633, 1598, 1560, 1513, 1484, 1322, 1290, 1232, 1164, 1087, 1021, 958, 821, 692 cm<sup>-1</sup>. **MS (EI<sup>+</sup>, 70 eV) *m/z* (%)**: 204.0 (10), 203.0 (81) [M]<sup>+</sup> = [C<sub>11</sub>H<sub>9</sub>NO<sub>3</sub>]<sup>+</sup>, 157.9 (17), 156.9 (100) [M-NO<sub>2</sub>]<sup>+</sup> = [C<sub>11</sub>H<sub>9</sub>O]<sup>+</sup>, 156.0 (18), 141.9 (36), 127.9 (13), 126.9 (15), 113.9 (52), 119.9 (27), 87.9 (15), 63.0 (12) ppm. **MS (CI<sup>+</sup>, methane) *m/z* (%)**: 232.1 (17) [M+C<sub>2</sub>H<sub>5</sub>]<sup>+</sup> = [C<sub>13</sub>H<sub>14</sub>NO<sub>3</sub>]<sup>+</sup>, 203.9 (100) [M+H]<sup>+</sup> = [C<sub>11</sub>H<sub>10</sub>NO<sub>3</sub>]<sup>+</sup>. **HR-MS (EI<sup>+</sup>):** calc. for [M]<sup>+</sup> = [C<sub>11</sub>H<sub>9</sub>NO<sub>3</sub>]<sup>+</sup>: 203.0577; found: 203.0578.

**(E)-1-Ethynyl-4-fluoro-2-(2-nitrovinyl)benzene (1c)**

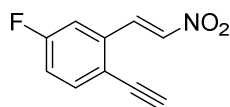

**1c** was obtained after flash chromatography (SiO<sub>2</sub>, *n*-pentane/Et<sub>2</sub>O 2:1 to pure Et<sub>2</sub>O) as yellow solid (1.16 g, 91%). **Molecular formular:** C<sub>10</sub>H<sub>6</sub>FNO<sub>2</sub>. **Molecular mass:** 191.16 g mol<sup>-1</sup>. **R<sub>f</sub>** (*n*-pentane/Et<sub>2</sub>O 15:1) = 0.49. **Mp:** 127-131 °C. **<sup>1</sup>H NMR** (600 MHz, CDCl<sub>3</sub>): δ = 3.50 (s, 1 H, CH), 7.15-7.20 (m, 1 H, CH<sub>Ar</sub>), 7.27 (dd, *J* = 2.5 Hz, *J* = 9.1 Hz, 1 H, CH<sub>Ar</sub>), 7.61 (dd, *J* = 5.6 Hz, *J* = 8.6 Hz, 1 H, CH<sub>Ar</sub>), 7.67 (d, *J* = 13.8 Hz, 1 H, CH<sub>ol</sub>), 8.40 (dd, *J* = 0.7 Hz, *J* = 13.8 Hz, 1 H, CH<sub>ol</sub>) ppm. **<sup>13</sup>C{<sup>19</sup>F} NMR** (101 MHz, CDCl<sub>3</sub>): δ = 79.7 (s), 84.5 (d), 114.2 (d), 119.1 (d), 120.4 (s), 134.3 (s), 135.7 (d), 136.1 (d), 139.5 (d), 162.6 (s) ppm. **<sup>19</sup>F NMR** (376 MHz, CDCl<sub>3</sub>): δ = -108.24 (dd, *J* = 8.3 Hz, *J* = 14.1 Hz) ppm. **IR** (ATR):  $\tilde{\nu}$  = 3780, 3700, 3291, 3124, 3045, 2965, 2844, 2666, 2498, 2347, 2107, 1997, 1900, 1742, 1684, 1632, 1605, 1569, 1511, 1477, 1424, 1343, 1277, 1220, 1185, 1158, 963, 870, 843, 823, 715, 681 cm<sup>-1</sup>. **MS (EI<sup>+</sup>, 70 eV) *m/z* (%)**: 191.0 (30) [M]<sup>+</sup> = [C<sub>10</sub>H<sub>6</sub>FNO<sub>2</sub>]<sup>+</sup>, 145.9 (16), 144.9 (100) [M-NO<sub>2</sub>]<sup>+</sup> = [C<sub>10</sub>H<sub>6</sub>F]<sup>+</sup>, 143.9 (34), 132.9 (32), 124.9 (42), 98.9 (17), 74.9 (13). **MS (CI<sup>+</sup>, methane) *m/z* (%)**: 220.0 (19) [M+C<sub>2</sub>H<sub>5</sub>]<sup>+</sup> = [C<sub>12</sub>H<sub>11</sub>FNO<sub>2</sub>]<sup>+</sup>, 191.9 (100) [M+H]<sup>+</sup> = [C<sub>10</sub>H<sub>7</sub>FNO<sub>2</sub>]<sup>+</sup>. **HR-MS (EI<sup>+</sup>):** calc. for [M]<sup>+</sup> = [C<sub>10</sub>H<sub>6</sub>FNO<sub>2</sub>]<sup>+</sup>: 191.0377; found: 191.0376.

**(E)-5-Ethynyl-6-(2-nitrovinyl)benzo[d][1,3]dioxole (1d)**

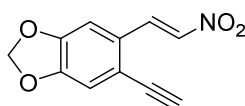

**1d** was obtained after flash chromatography (SiO<sub>2</sub>, *n*-pentane/CH<sub>2</sub>Cl<sub>2</sub> 1:1 zu 1:2) as yellow solid (938 mg, 58%). **Molecular formular:** C<sub>11</sub>H<sub>7</sub>NO<sub>4</sub>. **Molecular mass:** 217.18 g mol<sup>-1</sup>. **R<sub>f</sub>** (*n*-pentane/Et<sub>2</sub>O 6:1) = 0.32. **Mp:** 178-183 °C. **<sup>1</sup>H NMR** (600 MHz, CDCl<sub>3</sub>, major diastereomer): δ = 3.46 (s, 1 H, *CH*), 6.08 (s, 2 H, *CH*<sub>2</sub>), 7.00 (s, 1 H, *CH*<sub>Ar</sub>), 7.01 (s, 1 H, *CH*<sub>Ar</sub>), 7.55 (d, *J* = 13.6 Hz, 1 H, *CH*<sub>ol</sub>), 8.46 (d, *J* = 13.6 Hz, 1 H, *CH*<sub>ol</sub>) ppm. **<sup>13</sup>C NMR** (151 MHz, CDCl<sub>3</sub>, major diastereomer): δ = 80.4 (s), 83.9 (d), 102.6 (t), 106.0 (d), 113.1 (d), 120.1 (s), 127.1 (s), 136.8 (d), 137.1 (d), 149.3 (s), 150.9 (s) ppm. **IR** (ATR):  $\tilde{\nu}$  = 3946, 3400, 3267, 3114, 2928, 2647, 2304, 2098, 1935, 1819, 1709, 1608, 1483, 1259, 1161, 918, 837, 730, 697 cm<sup>-1</sup>. **MS (EI<sup>+</sup>, 70 eV) *m/z* (%)**: 217.0 (49) [M]<sup>+</sup> = [C<sub>11</sub>H<sub>7</sub>NO<sub>4</sub>]<sup>+</sup>, 171.9 (17), 170.9 (100) [M-NO<sub>2</sub>]<sup>+</sup> = [C<sub>11</sub>H<sub>7</sub>O<sub>2</sub>]<sup>+</sup>, 169.9 (17), 168.9 (13), 140.9 (69), 112.8 (52), 86.9 (16), 85.9 (13), 63.0 (23), 62.0 (10). **MS (CI<sup>+</sup>, methane) *m/z* (%)**: 246.1 (6) [M+C<sub>2</sub>H<sub>5</sub>]<sup>+</sup> = [C<sub>13</sub>H<sub>12</sub>NO<sub>4</sub>]<sup>+</sup>, 218.0 (100) [M+H]<sup>+</sup> = [C<sub>11</sub>H<sub>8</sub>NO<sub>4</sub>]<sup>+</sup>. **HR-MS (ESI<sup>+</sup>)**: calc. for [M+Na]<sup>+</sup> = [C<sub>11</sub>H<sub>7</sub>NaNO<sub>3</sub>]<sup>+</sup>: 240.0267; found: 240.0263.

**(E)-4-Chloro-1-ethynyl-2-(2-nitrovinyl)benzene (1e)**

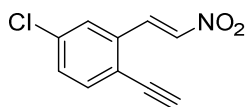

**1e** was obtained after flash chromatography (SiO<sub>2</sub>, *n*-pentane/Et<sub>2</sub>O 2:1 to pure Et<sub>2</sub>O) as yellow solid (1.03 g, 86%). **Molecular formular:** C<sub>10</sub>H<sub>6</sub>ClNO<sub>2</sub>. **Molecular mass:** 207.61 g mol<sup>-1</sup>. **R<sub>f</sub>** (*n*-pentane/Et<sub>2</sub>O 15:1) = 0.54. **Mp:** 109-113 °C. **<sup>1</sup>H NMR** (600 MHz, CDCl<sub>3</sub>): δ = 3.56 (s, 1 H, *CH*), 7.40-7.43 (m, 1 H, *CH*<sub>Ar</sub>), 7.53-7.57 (m, 2 H, *CH*<sub>Ar</sub>), 7.69 (d, *J* = 13.8 Hz, 1 H, *CH*<sub>ol</sub>), 8.36 (dd, *J* = 0.9 Hz, *J* = 13.7 Hz, 1 H, *CH*<sub>ol</sub>) ppm. **<sup>13</sup>C NMR** (151 MHz, CDCl<sub>3</sub>): δ = 79.8 (s), 85.8 (d), 122.4 (s), 127.5 (d), 131.6 (d), 133.7 (s), 135.2 (d), 135.4 (d), 135.7 (s), 139.5 (d) ppm. **IR** (ATR):  $\tilde{\nu}$  = 3948, 3780, 3698, 3432, 3282, 3109, 3062, 2968, 2924, 2844, 2743, 2595, 2487, 2295, 2105, 1999, 1911, 1822, 1774, 1682, 1635, 1587, 1547, 1510, 1470, 1339, 1281, 1207, 1180, 1115, 1082, 1038, 963, 919, 889, 826, 717, 677 cm<sup>-1</sup>. **MS (EI<sup>+</sup>, 70 eV) *m/z* (%)**: 209.0 (14) [M, <sup>37</sup>Cl]<sup>+</sup> = [C<sub>10</sub>H<sub>6</sub>ClNO<sub>2</sub>]<sup>+</sup>, 207.0 (41) [M, <sup>35</sup>Cl]<sup>+</sup> = [C<sub>10</sub>H<sub>6</sub>ClNO<sub>2</sub>]<sup>+</sup>, 162.9 (34) [M-NO<sub>2</sub>, <sup>37</sup>Cl]<sup>+</sup> = [C<sub>10</sub>H<sub>6</sub>Cl]<sup>+</sup>, 161.9 (22), 160.9 (100) [M-NO<sub>2</sub>, <sup>35</sup>Cl]<sup>+</sup> = [C<sub>10</sub>H<sub>6</sub>Cl]<sup>+</sup>, 159.9 (20), 150.9 (11), 148.9 (31), 126.9 (10), 125.9 (78), 124.9 (20), 98.9 (12), 74.9 (11). **MS (CI<sup>+</sup>, methane) *m/z* (%)**: 238.0 (6) [M+C<sub>2</sub>H<sub>5</sub>, <sup>37</sup>Cl]<sup>+</sup> = [C<sub>12</sub>H<sub>11</sub>ClNO<sub>2</sub>]<sup>+</sup>, 236.0 (18) [M+C<sub>2</sub>H<sub>5</sub>, <sup>35</sup>Cl]<sup>+</sup> = [C<sub>12</sub>H<sub>11</sub>ClNO<sub>2</sub>]<sup>+</sup>, 209.9 (32) [M+H, <sup>37</sup>Cl]<sup>+</sup> = [C<sub>10</sub>H<sub>7</sub>ClNO<sub>2</sub>]<sup>+</sup>, 207.9 (100) [M+H, <sup>35</sup>Cl]<sup>+</sup> = [C<sub>10</sub>H<sub>7</sub>ClNO<sub>2</sub>]<sup>+</sup>. **EA:** calc. for C<sub>10</sub>H<sub>6</sub>ClNO<sub>2</sub>: C 57.85%, H 2.91%, N 6.75%; found: C 57.61%, H 3.35%, N 6.55%.

**(E)-1-Ethynyl-2-(2-nitrovinyl)naphthalene (1f)**

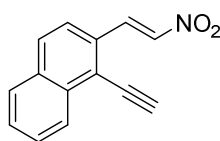

**1f** was obtained after flash chromatography (SiO<sub>2</sub>, *n*-pentane/CH<sub>2</sub>Cl<sub>2</sub> 5:1 zu 1:1) as yellow solid (368 mg, 73%). **Molecular formular:** C<sub>14</sub>H<sub>9</sub>NO<sub>2</sub>. **Molecular mass:** 223.23 g mol<sup>-1</sup>. **R<sub>f</sub>** (*n*-pentane/Et<sub>2</sub>O 10:1) = 0.36. **Mp:** 143-145 °C. **<sup>1</sup>H NMR** (600 MHz, CDCl<sub>3</sub>): δ = 3.99 (s, 1 H, CH), 7.59 (d, *J* = 8.7 Hz, 1 H, CH<sub>Ar</sub>), 7.60-7.67 (m, 2 H, CH<sub>Ar</sub>), 7.74 (d, *J* = 13.7 Hz, 1 H, CH<sub>ol</sub>), 7.83-7.89 (m, 2 H, CH<sub>Ar</sub>), 8.44 (d, *J* = 8.1 Hz, 1 H, CH<sub>Ar</sub>), 8.76 (d, *J* = 13.7 Hz, 1 H, CH<sub>ol</sub>) ppm. **<sup>13</sup>C NMR** (151 MHz, CDCl<sub>3</sub>): δ = 78.6 (s), 90.8 (d), 122.4 (d), 123.8 (s), 127.5 (d), 128.3 (d), 128.5 (d), 128.8 (d), 129.9 (d), 130.8 (s), 133.9 (s), 134.3 (s), 137.3 (d), 138.8 (d) ppm. **IR** (ATR):  $\tilde{\nu}$  = 3897, 3428, 3282, 3103, 2932, 2812, 2296, 2090, 1986, 1924, 1690, 1615, 1499, 1324, 1242, 965, 812, 754, 724, 667 cm<sup>-1</sup>. **MS (EI<sup>+</sup>, 70 eV)** *m/z* (%): 222.9 (45) [M]<sup>+</sup> = [C<sub>14</sub>H<sub>9</sub>NO<sub>2</sub>]<sup>+</sup>, 177.9 (20), 176.9 (100) [M-NO<sub>2</sub>]<sup>+</sup> = [C<sub>14</sub>H<sub>9</sub>]<sup>+</sup>, 175.9 (76), 164.9 (14), 150.9 (18), 149.9 (14), **MS (CI<sup>+</sup>, methane)** *m/z* (%): 447.5 (100) = [2M+H]<sup>+</sup> = [C<sub>28</sub>H<sub>19</sub>N<sub>2</sub>O<sub>4</sub>]<sup>+</sup>. **EA:** calc. for C<sub>14</sub>H<sub>9</sub>NO<sub>2</sub>: C 75.33%, H 4.06%, N 6.27%; found: C 75.03%, H 4.16%, N 6.25%.

**(E)-1-(Cyclohexylethynyl)-2-(2-nitrovinyl)benzene (1g)**

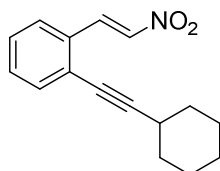

**1g** was obtained after flash chromatography (SiO<sub>2</sub>, *n*-pentane/Et<sub>2</sub>O 20:1 zu 10:1) as yellow solid (2.08 g, 94%). **Molecular formular:** C<sub>16</sub>H<sub>17</sub>NO<sub>2</sub>. **Molecular mass:** 255.32 g mol<sup>-1</sup>. **R<sub>f</sub>** (*n*-pentane/Et<sub>2</sub>O 20:1) = 0.57. **Mp:** 81-83 °C. **<sup>1</sup>H NMR** (600 MHz, CDCl<sub>3</sub>): δ = 1.40 (t, *J* = 7.1 Hz, 3 H, CH<sub>2</sub>), 1.53-1.66 (m, 3 H, CH<sub>2</sub>), 1.75-1.83 (m, 2 H, CH<sub>2</sub>), 1.88-1.98 (m, 2 H, CH<sub>2</sub>), 2.67-2.74 (m, 1 H, CH), 7.32 (td, *J* = 1.1 Hz, *J* = 7.6 Hz, 1 H, CH<sub>Ar</sub>), 7.39 (td, *J* = 1.2 Hz, *J* = 7.6 Hz, 1 H, CH<sub>Ar</sub>), 7.47-7.55 (m, 2 H, CH<sub>Ar</sub>), 7.77 (d, *J* = 13.8 Hz, 1 H, CH<sub>ol</sub>), 8.47 (d, *J* = 13.8 Hz, 1 H, CH<sub>ol</sub>) ppm. **<sup>13</sup>C NMR** (151 MHz, CDCl<sub>3</sub>): δ = 25.0 (t), 26.0 (t, 2 C), 30.0 (d), 32.6 (t, 2 C) 78.2 (s), 103.0 (s), 126.4 (s), 127.8 (d), 128.2 (d), 131.3 (s), 131.5 (d), 133.5 (d), 137.7 (d), 138.1 (d) ppm. **IR** (ATR):  $\tilde{\nu}$  = 3831, 3111, 2927, 2858, 2662, 2488, 2310, 2221, 2098, 1934, 1822, 1731, 1632, 1501, 1338, 1198, 1097, 1028, 964, 847, 752 cm<sup>-1</sup>. **MS (EI<sup>+</sup>, 70 eV)** *m/z* (%): 255.1 (17) [M]<sup>+</sup> = [C<sub>16</sub>H<sub>17</sub>NO<sub>2</sub>]<sup>+</sup>, 210.1 (7), 209.1 (40) [M-NO<sub>2</sub>]<sup>+</sup> = [C<sub>16</sub>H<sub>17</sub>]<sup>+</sup>, 208.1 (9), 194.0 (5), 181.0 (20), 180.0 (11), 179.0 (17), 178.0 (14), 169.0 (6), 168.0 (14), 167.0 (53) [M-C<sub>3</sub>H<sub>6</sub>NO<sub>2</sub>]<sup>+</sup> = [C<sub>13</sub>H<sub>11</sub>]<sup>+</sup>, 164.9 (46) [M-C<sub>3</sub>H<sub>8</sub>NO<sub>2</sub>]<sup>+</sup> = [C<sub>13</sub>H<sub>9</sub>]<sup>+</sup>, 153.0 (24), 151.9 (45) [M-C<sub>4</sub>H<sub>9</sub>NO<sub>2</sub>]<sup>+</sup> = [C<sub>12</sub>H<sub>8</sub>]<sup>+</sup>, 150.9 (14), 142.9 (10), 141.9 (22), 140.9 (100) [M-C<sub>5</sub>H<sub>8</sub>NO<sub>2</sub>]<sup>+</sup> = [C<sub>11</sub>H<sub>9</sub>]<sup>+</sup>, 138.9 (19), 128.9 (23), 127.9 (15), 126.9 (10), 125.9 (7), 116.9 (9), 114.9 (53), 80.9 (17). **MS (CI<sup>+</sup>,**

**methane**)  $m/z$  (%): 284.1 (27)  $[M+C_2H_5]^+ = [C_{18}H_{22}NO_2]^+$ , 256.0 (100)  $[M+H]^+ = [C_{16}H_{18}NO_2]^+$ . **HR-MS (ESI<sup>+</sup>)**: calc. for  $[M+H]^+ = [C_{16}H_{18}NO_2]^+$ : 256.1336, found: 256.1332.

**(E)-1-(Hex-1-yn-1-yl)-2-(2-nitrovinyl)benzene [1h]**

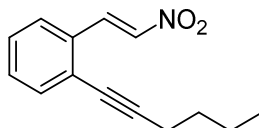

**1h** was isolated after flash chromatography (SiO<sub>2</sub>, *n*-pentane/Et<sub>2</sub>O 20:1) as yellow solid (920 mg, 76%). **Molecular formula**: C<sub>14</sub>H<sub>15</sub>NO<sub>2</sub>. **Molecular mass**: 229.28 g mol<sup>-1</sup>. **R<sub>f</sub>**(*n*-pentane/ether 20:1) = 0.57. **Mp**: 153-155 °C. **<sup>1</sup>H NMR** (600 MHz, CDCl<sub>3</sub>):  $\delta$  = 0.95 (t,  $J$  = 7.4 Hz, 3 H, CH<sub>3</sub>), 1.45-1.51 (m, 2 H, CH<sub>2</sub>), 1.57-1.63 (m, 2 H, CH<sub>2</sub>), 2.43 (t,  $J$  = 7.1 Hz, 2 H, CH<sub>2</sub>), 7.42 (m, 4 H, CH<sub>Ar</sub>), 7.56 (d,  $J$  = 13.6 Hz, 1 H, CH<sub>ol</sub>), 7.96 (dd,  $J$  = 0.9 Hz,  $J$  = 13.7 Hz, 1 H, CH<sub>ol</sub>) ppm. **<sup>13</sup>C NMR** (151 MHz, CDCl<sub>3</sub>):  $\delta$  = 13.8 (q), 19.4 (t), 22.2 (t), 30.8 (t), 80.2 (s), 94.9 (s), 128.5 (s), 129.0 (s), 129.1 (d, 2 C), 132.5 (d, 2 C), 137.2 (d), 138.5 (d) ppm. **IR** (ATR):  $\tilde{\nu}$  = 3734, 3112, 3045, 2932, 2865, 2652, 2298, 2222, 2108, 1995, 1925, 1800, 1701, 1630, 1598, 1549, 1499, 1413, 1334, 1256, 1203, 1178, 1107, 1053, 1008, 969, 825, 738, 687 cm<sup>-1</sup>. **MS (EI<sup>+</sup>, 70 eV)**  $m/z$  (%): 229.1 (100)  $[M]^+ = [C_{14}H_{15}NO_2]^+$ , 214.0 (28), 213.1 (7), 212.0 (6), 195.0 (9), 186.0 (9), 183.0 (10), 182.0 (18)  $[M-HNO_2]^+ = [C_{14}H_{14}]^+$ , 181.0 (5), 171.0 (6), 169.0 (6), 168.0 (12), 167.0 (39)  $[M-CH_4NO_2]^+ = [C_{13}H_{12}]^+$ , 164.9 (10), 155.0 (9), 154.0 (16), 153.0 (35)  $[M-C_2H_5NO_2]^+ = [C_{12}H_{10}]^+$ , 151.9 (29), 150.9 (6), 142.0 (11), 141.0 (19), 140.0 (21), 138.9 (94)  $[M-C_3H_8NO_2]^+ = [C_{11}H_7]^+$ , 127.9 (22), 114.9 (35). **MS (CI<sup>+</sup>, methane)**  $m/z$  (%): 258.1 (16)  $[M+C_2H_5]^+ = [C_{16}H_{20}NO_2]^+$ , 230.1 (100)  $[M+H, ^{35}Cl]^+ = [C_{14}H_{16}NO_2]^+$ . **HRMS (ESI)**: calcd. for C<sub>14</sub>H<sub>16</sub>NO<sub>2</sub>: 230.1177, found: 230.1176.

**(2*R*,3*R*)-3'-Methyl-1-methylene-3-(nitromethyl)-1'-phenyl-1,3-dihydrospiro[indene-2,4'-pyrazole]-5'(1'*H*)-one (3a)**

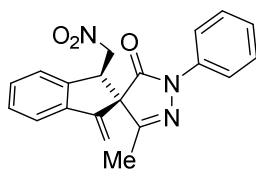

**3a** was obtained after flash chromatography (SiO<sub>2</sub>, *n*-pentane/EtOAc 6:1) as off-white solid (104 mg, 99%, d.r. 10:1). **Molecular formula:** C<sub>20</sub>H<sub>17</sub>N<sub>3</sub>O<sub>3</sub>. **Molecular mass:** 347.37 g mol<sup>-1</sup>. **R<sub>f</sub>** (*n*-pentane/EtOAc 6:1) = 0.34. **Mp:** 83-84 °C. **HPLC:** AS, 7/3 *n*-heptane/*i*-PrOH, 0.5 mL/min, λ = 254 nm, τ<sub>Neben</sub> = 17.1 min, τ<sub>Major</sub> = 14.2 min. **OR:** [α]<sub>D</sub><sup>20</sup> = -86.8 (*c* = 0.5, CHCl<sub>3</sub>, 94% *ee*). **<sup>1</sup>H NMR** (600 MHz, CDCl<sub>3</sub>): δ = 1.94 (s, 0.3 H, CH<sub>3</sub>, b), 2.04 (s, 3.0 H, CH<sub>3</sub>, a), 4.31 (dd, *J* = 4.2 Hz, *J* = 10.2 Hz, 1.0 H, CH, a), 4.37 (dd, *J* = 9.2 Hz, *J* = 14.5 Hz, 0.2 H, CH<sub>2</sub>, b), 4.66 (dd, *J* = 6.3 Hz, *J* = 8.8 Hz, 0.2 H, CH, b), 4.81 (dd, *J* = 4.3 Hz, *J* = 15.2 Hz, 1.0 H, CH<sub>2</sub>, a), 4.93 (dd, *J* = 6.0 Hz, *J* = 14.5 Hz, 0.2 H, CH<sub>2</sub>, b), 4.98 (d, *J* = 1.3 Hz, 1.0 H, CH<sub>ol</sub>, a), 5.00 (d, *J* = 1.2 Hz, 0.2 H, CH<sub>ol</sub>, b), 5.27 (dd, *J* = 10.3 Hz, *J* = 15.2 Hz, 1.0 H, CH<sub>2</sub>, a), 5.70-5.73 (m, 1.2 H, CH<sub>ol</sub>, a+b), 7.18-7.24 (m, 1.2 H, CH<sub>Ar</sub>), 7.26-7.30 (m, 1.0 H, CH<sub>Ar</sub>), 7.37-7.45 (m, 4.3 H, CH<sub>Ar</sub>), 7.57-7.63 (m, 1.1 H, CH<sub>Ar</sub>), 7.85 (dd, *J* = 1.1 Hz, *J* = 7.7 Hz, 2.0 H, CH<sub>Ar</sub>), 7.94 (dd, *J* = 0.9 Hz, *J* = 8.6 Hz, 1.0 H, CH<sub>Ar</sub>) ppm. **<sup>13</sup>C NMR** (151 MHz, CDCl<sub>3</sub>, major diastereomer): δ = 13.7 (q), 45.2 (d), 65.8 (s), 73.7 (t), 107.1 (t), 119.6 (d, 2 C), 122.3 (d), 124.5 (d), 125.6 (d), 129.0 (d, 2 C), 129.5 (d), 130.4 (d), 137.8 (s), 138.9 (s), 140.6 (s), 146.0 (s), 161.6 (s), 172.4 (s) ppm. **IR** (ATR): ν̄ = 3743, 3392, 3060, 2916, 2650, 2243, 2192, 2157, 2106, 2030, 1951, 1777, 1702, 1637, 1619, 1594, 1543, 1492, 1461, 1397, 1365, 1329, 1287, 1238, 1204, 1181, 1129, 1097, 1068, 914, 886, 838, 760, 731, 695, 672 cm<sup>-1</sup>. **MS (EI<sup>+</sup>, 70 eV)** *m/z* (%): 348.1 (23), 347.1 (100) [M]<sup>+</sup> = [C<sub>20</sub>H<sub>17</sub>N<sub>3</sub>O<sub>3</sub>]<sup>+</sup>, 300.1 (10) [M-HNO<sub>2</sub>]<sup>+</sup> = [C<sub>20</sub>H<sub>16</sub>N<sub>2</sub>O]<sup>+</sup>. **MS (CI<sup>+</sup>, methane)** *m/z* (%): 376.0 (13) [M+C<sub>2</sub>H<sub>5</sub>]<sup>+</sup> = [C<sub>22</sub>H<sub>22</sub>N<sub>3</sub>O<sub>3</sub>]<sup>+</sup>, 348.0 (100) [M+H]<sup>+</sup> = [C<sub>20</sub>H<sub>18</sub>N<sub>3</sub>O<sub>3</sub>]<sup>+</sup>. **HR-MS (ESI<sup>+</sup>):** calc. for [M+Na]<sup>+</sup> = [C<sub>20</sub>H<sub>17</sub>NaN<sub>3</sub>O<sub>3</sub>]<sup>+</sup>: 370.1162; found: 370.1166.

**(2*R*,3*R*)-1-methylene-3-(nitromethyl)-1',3'-diphenyl-1,3-dihydrospiro[indene-2,4'-pyrazole]-5'(1'*H*)-on (3b)**

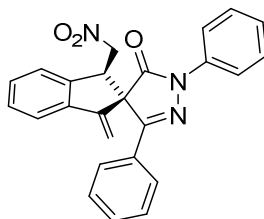

**3b** was obtained after flash chromatography (SiO<sub>2</sub>, *n*-pentane/EtOAc 6:1) as colorless solid (91 mg, 99%, d.r. 10:1). **Molecular formula:** C<sub>25</sub>H<sub>19</sub>N<sub>3</sub>O<sub>3</sub>. **Molecular mass:** 409.45 g mol<sup>-1</sup>. **R<sub>f</sub>** (*n*-pentane/EtOAc 6:1) = 0.30. **Mp:** 70-73 °C. **HPLC:** IA, 7/3 *n*-heptane/EtOH, 1.0 mL/min, λ = 254 nm, τ<sub>Minor</sub> = 13.1 min, τ<sub>Major</sub> = 15.5 min. **OR:** [α]<sub>D</sub><sup>20</sup> = +5.2 (*c* = 0.5, CHCl<sub>3</sub>, 95% *ee*). **<sup>1</sup>H NMR** (600 MHz, CDCl<sub>3</sub>): δ = 4.48 (dd, *J* = 11.8 Hz, *J* = 16.6 Hz, 0.2 H, CH<sub>2</sub>, b), 4.54 (dd, *J* = 3.8 Hz, *J* = 10.7 Hz, 1.0 H, CH, a), 4.72-4.78 (m, 0.3 H, CH, CH<sub>2</sub>, b), 4.88 (dd, *J* = 4.0 Hz, *J* = 15.0 Hz, 1.0 H, CH<sub>2</sub>, a),

5.08 (s, 1.0 H,  $CH_{ol}$ , a), 5.10 (d, 0.2 H,  $CH_{ol}$ , b), 5.34 (dd,  $J = 10.7$  Hz,  $J = 15.0$  Hz, 1.0 H,  $CH_2$ , a), 5.75 (s, 1.0 H,  $CH_{ol}$ , a), 5.79 (s, 0.2 H,  $CH_{ol}$ , b), 7.20-7.31 (m, 2.7 H,  $CH_{Ar}$ ), 7.31-7.38 (m, 2.1 H,  $CH_{Ar}$ ), 7.38-7.51 (m, 5.1 H,  $CH_{Ar}$ ), 7.61 (d,  $J = 7.6$  Hz, 1.8 H,  $CH_{Ar}$ ), 7.68-7.72 (m, 1.0 H,  $CH_{Ar}$ ), 7.95-7.98 (m, 1.8 H,  $CH_{Ar}$ ), 8.04-8.07 (m, 0.2 H,  $CH_{Ar}$ ) ppm.  $^{13}C$  NMR (151 MHz,  $CDCl_3$ , major diastereomer):  $\delta = 46.5$  (d), 64.6 (s), 73.4 (t), 106.9 (t), 119.9 (d, 2 C), 122.6 (d), 124.6 (d), 125.9 (d), 127.0 (d, 2 C), 129.1 (d, 4 C), 129.4 (s), 129.5 (d), 130.5 (d), 130.8 (d), 137.9 (s), 139.0 (s), 140.8 (s), 147.2 (s), 160.3 (s), 173.0 (s) ppm. IR (ATR):  $\tilde{\nu} = 3349, 3228, 2856, 2758, 2324, 2096, 1934, 1834, 1679, 1589, 1455, 1354, 1271, 1201, 1093, 956, 892, 834, 738, 675$   $cm^{-1}$ . MS (EI, 70 eV)  $m/z$  (%): 409.0 (100)  $[M]^+ = [C_{25}H_{19}N_3O_3]^+$ , 362.1 (22)  $[M-HNO_2]^+ = [C_{25}H_{18}N_2O]^+$ . MS (CI<sup>+</sup>, methane)  $m/z$  (%): 410.0 (48)  $[M+H]^+ = [C_{25}H_{20}N_3O_3]^+$ . HR-MS (EI<sup>+</sup>): calc. for  $[M]^+ = [C_{25}H_{19}N_3O_3]$ : 409.1421; found: 409.1423.

**(2R,3R)-3'-Ethyl-1-methylene-3-(nitromethyl)-1'-phenyl-1,3-dihydrospiro[indene-2,4'-pyrazole]-5'(1'H)-on (3c)**

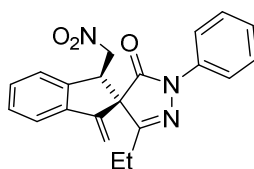

**3c** was obtained after flash chromatography ( $SiO_2$ ,  $n$ -pentane/EtOAc 4:1) as colorless solid (55 mg, 51%, d.r. >20:1). **Molecular formula:**  $C_{21}H_{19}N_3O_3$ . **Molecular mass:** 361.40  $g\ mol^{-1}$ .  $R_f$  ( $n$ -pentane/EtOAc 6:1) = 0.30. **Mp:** 149-151 °C. **HPLC:** IA, 7/3  $n$ -heptane/EtOH, 0.7 mL/min,  $\lambda = 254$  nm,  $\tau_{Minor} = 12.3$  min,  $\tau_{Major} = 10.7$  min. **OR:**  $[\alpha]_D^{20} = +86.4$  ( $c = 0.7$ ,  $CHCl_3$ , 91% *ee*).  $^1H$  NMR (600 MHz,  $CDCl_3$ , major diastereomer):  $\delta = 1.28$  (t,  $J = 7.3$  Hz, 3 H,  $CH_3$ ), 2.23-2.32 (m, 1 H,  $CH_2$ ), 2.34-2.43 (m, 1 H,  $CH_2$ ), 4.33 (dd,  $J = 4.3$  Hz,  $J = 10.2$  Hz, 1 H,  $CH$ ), 4.79 (dd,  $J = 4.3$  Hz,  $J = 15.1$  Hz, 1 H,  $CH_2$ ), 4.97 (d,  $J = 1.2$  Hz, 1 H,  $CH_{ol}$ ), 5.27 (dd,  $J = 10.2$  Hz,  $J = 15.2$  Hz, 1 H,  $CH_2$ ), 5.70 (d,  $J = 1.2$  Hz, 1 H,  $CH_{ols}$ ), 7.18-7.23 (m, 1 H,  $CH_{Ar}$ ), 7.24-7.30 (m, 1 H,  $CH_{Ar}$ ), 7.36-7.45 (m, 4 H,  $CH_{Ar}$ ), 7.57-7.63 (m, 1 H,  $CH_{Ar}$ ), 7.86-7.94 (m, 2 H,  $CH_{Ar}$ ) ppm.  $^{13}C$  NMR (151 MHz,  $CDCl_3$ , major diastereomer):  $\delta = 9.5$  (q), 21.1 (t), 45.2 (d), 65.7 (s), 73.7 (t), 106.9 (d), 119.4 (d, 2 C), 122.1 (d), 124.3 (d), 125.4 (d), 128.8 (d, 2 C), 129.3 (d), 130.2 (d), 137.8 (s), 138.8 (s), 140.7 (s), 146.2 (s), 165.3 (s), 172.8 (s) ppm. IR (ATR):  $\tilde{\nu} = 3925, 3876, 3838, 3769, 3701, 3595, 3391, 3275, 3025, 2984, 2913, 2641, 2340, 2271, 2224, 2071, 1992, 1943, 1889, 1826, 1779, 1700, 1637, 1594, 1542, 1491, 1400, 1350, 1244, 1221, 1181, 1131, 1100, 1035, 957, 911, 885, 760, 736, 688$   $cm^{-1}$ . MS (EI<sup>+</sup>, 70 eV)  $m/z$  (%): 361.0 (100)  $[M]^+ = [C_{21}H_{19}N_3O_3]^+$ , 315.1 (12)  $[M-NO_2]^+ = [C_{21}H_{19}N_2O]^+$ . MS (CI<sup>+</sup>, methane)  $m/z$  (%): 390.0 (16)  $[M+C_2H_5]^+ = [C_{23}H_{23}N_3O_3]^+$ , 362.0 (100)  $[M+H]^+ = [C_{21}H_{20}N_3O_3]^+$ . **EA:** calc. for  $C_{21}H_{19}N_3O_3$ : C 69.79%, H 5.30%, N 11.63%; found: C 69.73%, H 5.63%, N 11.28%.



**(2*R*,3*R*)-3'-Isopropyl-1-methylene-3-(nitromethyl)-1'-phenyl-1,3-dihydrospiro[indene-2,4'-pyrazole]-5'(1'*H*)-on (3d)**

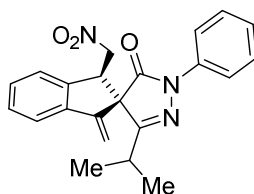

**3d** was obtained after flash chromatography (SiO<sub>2</sub>, *n*-pentane/EtOAc 4:1) as off-white solid (56 mg, 50%, d.r. 7:1). **Molecular formular:** C<sub>22</sub>H<sub>21</sub>N<sub>3</sub>O<sub>3</sub>. **Molecular mass:** 375.43 g mol<sup>-1</sup>. **R<sub>f</sub>** (*n*-pentane/EtOAc 6:1) = 0.27. **Mp:** 114-116 °C. **HPLC:** IC, 7/3 *n*-heptane/EtOH, 1.0 mL/min, λ = 254 nm, τ<sub>Minor</sub> = 7.5 min, τ<sub>Major</sub> = 9.2 min. **OR:** [α]<sub>D</sub><sup>20</sup> = -48.8 (*c* = 0.5, CHCl<sub>3</sub>, 76% *ee*). **<sup>1</sup>H NMR** (600 MHz, CDCl<sub>3</sub>): δ = 1.14 (d, *J* = 6.7 H, 0.4 H, CH<sub>3</sub>, b), 1.18 (d, *J* = 6.9 H, 3.0 H, CH<sub>3</sub>, a), 1.24 (d, *J* = 6.8 H, 0.5 H, CH<sub>3</sub>, b), 1.32 (d, *J* = 6.8 H, 3.0 H, CH<sub>3</sub>, a), 2.15 (sept, *J* = 6.8 H, 0.2 H, CH, b), 2.55 (sept, *J* = 6.9 H, 1.0 H, CH, a), 4.40 (dd, *J* = 4.3 Hz, *J* = 10.2 Hz, 1.0 H, CH, a), 4.51 (dd, *J* = 9.0 Hz, *J* = 14.7 Hz, 0.2 H, CH<sub>2</sub>, b), 4.66 (dd, *J* = 6.6 Hz, *J* = 8.5 Hz, 0.2 H, CH, b), 4.79 (dd, *J* = 4.3 Hz, *J* = 15.0 Hz, 1.0 H, CH<sub>2</sub>, a), 4.94 (dd, *J* = 6.1 Hz, *J* = 14.7 Hz, 0.2 H, CH<sub>2</sub>, b), 4.99 (d, *J* = 1.1 Hz, 1.0 H, CH<sub>ol</sub>, a), 5.05 (d, *J* = 1.0 Hz, 0.2 H, CH<sub>ol</sub>, b), 5.31 (dd, *J* = 10.2 Hz, *J* = 15.1 Hz, 1.0 H, CH<sub>2</sub>, a), 5.70 (d, *J* = 1.1 Hz, 0.2 H, CH<sub>ol</sub>, b), 5.71 (d, *J* = 1.3 Hz, 1.0 H, CH<sub>ol</sub>, a), 7.16-7.24 (m, 1.2 H, CH<sub>Ar</sub>), 7.24-7.30 (m, 1.2 H, CH<sub>Ar</sub>), 7.36-7.46 (m, 4.3 H, CH<sub>Ar</sub>), 7.56-7.63 (m, 1.1 H, CH<sub>Ar</sub>), 7.88 (d, *J* = 7.8 Hz, 1.8 H, CH<sub>Ar</sub>), 7.94 (d, *J* = 7.8 Hz, 0.3 H, CH<sub>Ar</sub>) ppm. **<sup>13</sup>C NMR** (151 MHz, CDCl<sub>3</sub>, major diastereomer): δ = 21.0 (q), 22.5 (q), 28.8 (d), 45.0 (d), 65.7 (s), 73.7 (t), 107.1 (t), 119.6 (d, 2 C), 122.2 (d), 124.5 (d), 125.4 (d), 129.0 (d, 2 C), 129.4 (d), 130.3 (d), 138.0 (s), 139.1 (s), 141.0 (s), 146.2 (s), 169.7 (s), 172.6 (s) ppm. **IR** (ATR): ν̄ = 3839, 3386, 3080, 2976, 2927, 2693, 2472, 2321, 2197, 2172, 2092, 2054, 1987, 1957, 1697, 1636, 1595, 1542, 1491, 1460, 1401, 1371, 1349, 1223, 1152, 1134, 1086, 1054, 1024, 977, 909, 885, 817, 759, 693, 661 cm<sup>-1</sup>. **MS (EI<sup>+</sup>, 70 eV)** *m/z* (%): 375.1 (100) [M]<sup>+</sup> = [C<sub>22</sub>H<sub>21</sub>N<sub>3</sub>O<sub>3</sub>]<sup>+</sup>, 329.1 (14) [M-NO<sub>2</sub>]<sup>+</sup> = [C<sub>22</sub>H<sub>21</sub>N<sub>2</sub>O]<sup>+</sup>. **MS (CI<sup>+</sup>, methane)** *m/z* (%): 404.1 (14) [M+C<sub>2</sub>H<sub>5</sub>]<sup>+</sup> = [C<sub>24</sub>H<sub>26</sub>N<sub>3</sub>O<sub>3</sub>]<sup>+</sup>, 376.1 (100) [M+H]<sup>+</sup> = [C<sub>22</sub>H<sub>22</sub>N<sub>3</sub>O<sub>3</sub>]<sup>+</sup>. **HR-MS (EI<sup>+</sup>):** calc. for [M]<sup>+</sup> = [C<sub>22</sub>H<sub>21</sub>N<sub>3</sub>O<sub>3</sub>]<sup>+</sup>: 375.1575; found: 375.1577.

**(2*R*,3*R*)-1'-(2-Chlorophenyl)-3'-methyl-1-methylene-3-(nitromethyl)-1,3-dihydrospiro[indene-2,4'-pyrazole]-5'(1'*H*)-on [3e]**

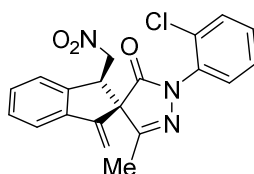

**3e** was obtained after flash chromatography (SiO<sub>2</sub>, *n*-pentane/EtOAc 4:1) as off-white solid (90 mg, 78%, d.r. 20:1). **Molecular formular:** C<sub>20</sub>H<sub>16</sub>ClN<sub>3</sub>O<sub>3</sub>. **Molecular mass:** 381.82 g mol<sup>-1</sup>. **R<sub>f</sub>** (*n*-pentane/EtOAc 5:1) = 0.32. **Mp:** 124-127 °C. **HPLC:** IC, 7/3 *n*-heptane/EtOH, 0.5 mL/min, λ = 254

nm,  $\tau_{Minor}$  = 7.6 min,  $\tau_{Major}$  = 10.4 min. **OR**:  $[\alpha]_D^{20} = -101.0$  ( $c = 0.5$ ,  $\text{CHCl}_3$ , 92% *ee*).  **$^1\text{H NMR}$**  (600 MHz,  $\text{CDCl}_3$ ):  $\delta = 1.93$  (s, 0.2 H,  $\text{CH}_3$ , b), 2.03 (s, 3.0 H,  $\text{CH}_3$ , a), 4.34 (dd,  $J = 3.7$  Hz,  $J = 10.7$  Hz, 1.0 H,  $\text{CH}$ , a), 4.63-4.70 (m, 0.2 H,  $\text{CH}_2$ , b), 4.81 (dd,  $J = 3.8$  Hz,  $J = 18.9$  Hz, 1.1 H,  $\text{CH}_2$ (a),  $\text{CH}$ (b)), 5.02 (dd,  $J = 9.8$  Hz,  $J = 18.9$  Hz, 0.1 H,  $\text{CH}_2$ , b), 5.28 (s, 1.0 H,  $\text{CH}_{ol}$ , a), 5.30 (s, 0.1 H,  $\text{CH}_{ol}$ , b), 5.36 (dd,  $J = 10.8$  Hz,  $J = 15.4$  Hz, 1.0 H,  $\text{CH}_2$ , a), 5.76 (s, 0.1 H,  $\text{CH}_{ol}$ , b), 5.78 (s, 1.0 H,  $\text{CH}_{ol}$ , a), 7.22-7.31 (m, 1.4 H,  $\text{CH}_{Ar}$ ), 7.31-7.46 (m, 5.0 H,  $\text{CH}_{Ar}$ ), 7.47-7.58 (m, 1.1 H,  $\text{CH}_{Ar}$ ), 7.59-7.64 (m, 1.0 H,  $\text{CH}_{Ar}$ ) ppm.  **$^{13}\text{C NMR}$**  (151 MHz,  $\text{CDCl}_3$ , major diastereomer):  $\delta = 13.6$  (q), 45.1 (d), 64.1 (s), 73.5 (t), 107.5 (t), 122.3 (d), 124.4 (d), 127.9 (d), 129.1 (d), 129.5 (d), 130.1 (d), 130.3 (d), 130.5 (d), 132.0 (s), 134.2 (s), 139.1 (s), 140.5 (s), 145.7 (s), 162.0 (s), 173.0 (s) ppm. **IR** (ATR):  $\tilde{\nu} = 3856, 3746, 3301, 3013, 2916, 2668, 2460, 2289, 2080, 1992, 1934, 1809, 1705, 1638, 1611, 1548, 1485, 1438, 1408, 1373, 1288, 1205, 1132, 1100, 1054, 1003, 945, 888, 848, 763, 739, 670$   $\text{cm}^{-1}$ . **MS ( $\text{EI}^+$ )  $m/z$  (%)**: 383.0 (32)  $[\text{M}, ^{37}\text{Cl}]^+ = [\text{C}_{20}\text{H}_{16}\text{ClN}_3\text{O}_3]^+$ , 382.1 (25), 381.0 (100)  $[\text{M}, ^{35}\text{Cl}]^+ = [\text{C}_{20}\text{H}_{16}\text{ClN}_3\text{O}_3]^+$ , 346.0 (17)  $[\text{M}-\text{Cl}]^+ = [\text{C}_{20}\text{H}_{16}\text{N}_3\text{O}_3]^+$ , 333.5 (15), 334.0 (24), 305.0 (11), 300.0 (13), 299.0 (56), 195.0 (18), 180.0 (11), 167.0 (12), 166.0 (10), 164.9 (11), 152.9 (14), 151.9 (15), 140.9 (17), 138.9 (21), 126.9 (12), 124.8 (12), 114.8 (22), 110.8 (18). **MS ( $\text{CI}^+$ , methane)  $m/z$  (%)**: 410.1 (14)  $[\text{M}+\text{C}_2\text{H}_5, ^{35}\text{Cl}]^+ = [\text{C}_{22}\text{H}_{21}\text{ClN}_3\text{O}_3]^+$ , 384.1 (29)  $[\text{M}+\text{H}, ^{37}\text{Cl}]^+ = [\text{C}_{20}\text{H}_{17}\text{ClN}_3\text{O}_3]^+$ ,  $[\text{M}+\text{H}, ^{35}\text{Cl}]^+ = [\text{C}_{20}\text{H}_{17}\text{ClN}_3\text{O}_3]^+$ . **HR-MS ( $\text{ESI}^+$ )**: calc. for  $[\text{M}+\text{Na}, ^{35}\text{Cl}]^+ = [\text{C}_{20}\text{H}_{16}\text{ClNaN}_3\text{O}_3]^+$ : 404.0772; found: 404.0767.

**(2*R*,3*R*)-1'-(4-Chlorophenyl)-3'-methyl-1-methylene-3-(nitromethyl)-1,3-dihydrospiro[indene-2,4'-pyrazole]-5'(1'*H*)-on (3f)**

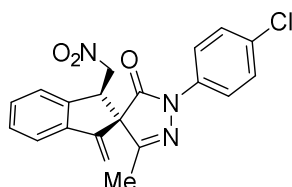

**3f** was obtained after flash chromatography ( $\text{SiO}_2$ , *n*-pentane/EtOAc 6:1) as colorless solid (36 mg, 38%, d.r. >20:1). **Molecular formula**:  $\text{C}_{20}\text{H}_{16}\text{ClN}_3\text{O}_3$ . **Molecular mass**: 381.82  $\text{g mol}^{-1}$ .  **$R_f$**  (*n*-pentane/EtOAc 6:1) = 0.34. **Mp**: 127-130  $^\circ\text{C}$ . **HPLC**: IC, 9/1 *n*-heptane/EtOH, 1.0 mL/min,  $\lambda = 254$  nm,  $\tau_{Minor}$  = 4.1 min,  $\tau_{Major}$  = 4.7 min. **OR**:  $[\alpha]_D^{20} = -106.1$  ( $c = 0.5$ ,  $\text{CHCl}_3$ , 99% *ee*).  **$^1\text{H NMR}$**  (600 MHz,  $\text{CDCl}_3$ , major diastereomer):  $\delta = 2.04$  (s, 3 H,  $\text{CH}_3$ ), 4.30 (dd,  $J = 4.0$  Hz,  $J = 10.5$  Hz, 1 H,  $\text{CH}$ ), 4.80 (dd,  $J = 4.1$  Hz,  $J = 15.2$  Hz, 1 H,  $\text{CH}_2$ ), 4.06 (s, 1 H,  $\text{CH}_{ol}$ ), 5.25 (dd,  $J = 10.6$  Hz,  $J = 15.2$  Hz, 1 H,  $\text{CH}_2$ ), 5.72 (d,  $J = 0.6$  Hz, 1 H,  $\text{CH}_{ol}$ ), 7.26-7.31 (m, 1 H,  $\text{CH}_{Ar}$ ), 7.35 (d,  $J = 8.9$  Hz, 2 H,  $\text{CH}_{Ar}$ ), 7.37-7.44 (m, 2 H,  $\text{CH}_{Ar}$ ), 7.58-7.63 (m, 1 H,  $\text{CH}_{Ar}$ ), 7.83 (d,  $J = 8.9$  Hz, 2 H,  $\text{CH}_{Ar}$ ) ppm.  **$^{13}\text{C NMR}$**  (151 MHz,  $\text{CDCl}_3$ , major diastereomer):  $\delta = 13.7$  (q), 45.3 (d), 65.8 (s), 73.6 (t), 107.3 (t), 120.5 (d, 2 C), 122.3 (d), 124.5 (d), 129.1 (d, 2 C), 129.5 (d), 130.5 (d), 130.7 (s), 136.4 (s), 138.9 (s), 140.5 (s), 145.9 (s), 161.9 (s), 172.4 (s) ppm. **IR** (ATR):  $\tilde{\nu} = 3859, 3742, 3617, 3566, 3379, 3091, 3036, 2919, 2852, 2656, 2324, 2223, 2194, 2056, 2017, 1964, 1934, 1901, 1798, 1698, 1629, 1594, 1545, 1490, 1438, 1361, 1296, 1216, 1186, 1129, 1090, 1009, 951, 895, 825, 777, 739$   $\text{cm}^{-1}$ . **MS ( $\text{EI}^+$ )  $m/z$**

(%): 383.1 (32)  $[M, ^{37}\text{Cl}]^+ = [\text{C}_{20}\text{H}_{16}\text{ClN}_3\text{O}_3]^+$ , 382.1 (25), 381.0 (100)  $[M, ^{35}\text{Cl}]^+ = [\text{C}_{20}\text{H}_{16}\text{ClN}_3\text{O}_3]^+$ , 333.1 (11), 334.1 (10), 305.0 (12), 194.9 (15), 180.0 (12), 169.0 (10), 168.0 (11), 167.0 (22), 166.0 (12), 164.9 (14), 152.9 (19), 151.9 (20), 140.9 (21), 139.9 (10), 138.9 (21), 127.9 (11), 126.9 (16), 124.8 (20), 114.8 (27), 112.9 (11), 110.8 (30), 74.9 (10), 71.0 (10). **MS (CI<sup>+</sup>, methane)  $m/z$  (%)**: 410.1 (2)  $[M+\text{C}_2\text{H}_5, ^{35}\text{Cl}]^+ = [\text{C}_{22}\text{H}_{21}\text{ClN}_3\text{O}_3]^+$ , 382.0 (15)  $[M+\text{H}, ^{35}\text{Cl}]^+ = [\text{C}_{20}\text{H}_{17}\text{ClN}_3\text{O}_3]^+$ . **HR-MS (ESI<sup>+</sup>)**: calc. for  $[M+\text{Na}]^+ = [\text{C}_{20}\text{H}_{16}\text{ClNaN}_3\text{O}_3]^+$ : 404.0772; found: 404.0769.

**(2*R*,3*R*)-3'-Methyl-1-methylene-3-(nitromethyl)-1'-(*p*-tolyl)-1,3-dihydrospiro[indene-2,4'-pyrazole]-5'(1'*H*)-on (3g)**

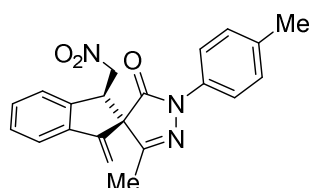

**3g** was obtained after flash chromatography (SiO<sub>2</sub>, *n*-pentane/EtOAc 6:1) as colorless solid (102 mg, 94%, d.r. 10:1). **Molecular formula**: C<sub>21</sub>H<sub>19</sub>N<sub>3</sub>O<sub>3</sub>. **Molecular mass**: 361.40 g mol<sup>-1</sup>. **R<sub>f</sub>** (*n*-pentane/EtOAc 6:1) = 0.34. **Mp**: 127-130 °C. **HPLC**: AS, 7/3 *n*-heptane/*i*-PrOH, 1.0 mL/min, λ = 254 nm, τ<sub>Minor</sub> = 9.3 min, τ<sub>Major</sub> = 6.5 min. **OR**:  $[\alpha]_D^{20} = -87.4$  (*c* = 0.5, CHCl<sub>3</sub>, 94% *ee*). **<sup>1</sup>H NMR** (600 MHz, CDCl<sub>3</sub>): δ = 1.93 (s, 0.3 H, CH<sub>3</sub>, b), 2.03 (s, 3.0 H, CH<sub>3</sub>, a), 2.35 (s, 3.0 H, CH<sub>3</sub>, a), 2.36 (s, 3.0 H, CH<sub>3</sub>, b), 4.30 (dd, *J* = 4.3 Hz, *J* = 10.2 Hz, 1.0 H, CH, a), 4.56 (dd, *J* = 9.1 Hz, *J* = 14.5 Hz, 0.2 H, CH<sub>2</sub>, b), 4.61-4.69 (m, 0.2 H, CH, b), 4.80 (dd, *J* = 4.3 Hz, *J* = 15.2 Hz, 1.0 H, CH<sub>2</sub>, a), 4.92 (dd, *J* = 6.0 Hz, *J* = 14.5 Hz, 0.2 H, CH<sub>2</sub>, b), 4.97 (d, *J* = 1.3 Hz, 1.0 H, CH<sub>ol</sub>, a), 4.99 (d, *J* = 1.2 Hz, 0.2 H, CH<sub>ol</sub>, b), 5.26 (dd, *J* = 10.2 Hz, *J* = 15.2 Hz, 1.0 H, CH<sub>2</sub>, a), 5.70 (d, *J* = 1.4 Hz, 0.2 H, CH<sub>ol</sub>, b), 5.71 (d, *J* = 1.3 Hz, 1.0 H, CH<sub>ol</sub>, a), 7.18-7.25 (m, 2.3 H, CH<sub>Ar</sub>), 7.25-7.31 (m, 1.3 H, CH<sub>Ar</sub>), 7.36-7.43 (m, 2.1 H, CH<sub>Ar</sub>), 7.57-7.64 (m, 1.1 H, CH<sub>Ar</sub>), 7.69-7.72 (m, 1.9 H, CH<sub>Ar</sub>), 7.78-7.81 (m, 0.2 H, CH<sub>Ar</sub>) ppm. **<sup>13</sup>C NMR** (151 MHz, CDCl<sub>3</sub>, major diastereomer): δ = 13.6 (q), 21.1 (q), 45.2 (d), 65.8 (s), 73.8 (t), 107.1 (t), 119.7 (d, 2 C), 122.3 (d), 124.4 (d), 129.4 (d), 129.5 (d, 2 C), 130.3 (d), 135.3 (s), 135.4 (s), 139.0 (s), 140.7 (s), 146.0 (s), 161.5 (s), 172.3 (s) ppm. **IR** (ATR):  $\tilde{\nu} = 3375, 3095, 3004, 2918, 2857, 2317, 2125, 1904, 1794, 1693, 1645, 1615, 1553, 1508, 1462, 1404, 1364, 1285, 1200, 1129, 1067, 1017, 936, 894, 818, 782, 724, 709, 676$  cm<sup>-1</sup>. **MS (EI<sup>+</sup>)  $m/z$  (%)**: 361.2 (13)  $[M]^+ = [\text{C}_{21}\text{H}_{19}\text{N}_3\text{O}_3]^+$ , 152.1 (14), 141.2 (19), 139.1 (13), 128.1 (12), 127.1 (11), 115.1 (34), 106.2 (14), 105.1 (22), 104.1 (18), 91.2 (100), 65.3 (52). **MS (CI<sup>+</sup>, methane)  $m/z$  (%)**: 390.1 (7)  $[M+\text{C}_2\text{H}_5]^+ = [\text{C}_{23}\text{H}_{24}\text{N}_3\text{O}_3]^+$ , 362.1 (100)  $[M+\text{H}]^+ = [\text{C}_{21}\text{H}_{20}\text{N}_3\text{O}_3]^+$ . **HR-MS (ESI<sup>+</sup>)**: calc. for  $[M+\text{Na}]^+ = [\text{C}_{21}\text{H}_{19}\text{NaN}_3\text{O}_3]^+$ : 384.1319; found: 384.1301.

**(2*R*,3*R*)-1',3'-Dimethyl-1-methylene-3-(nitromethyl)-1,3-dihydrospiro[indene-2,4'-pyrazole]-5'(1'*H*)-on (3h)**

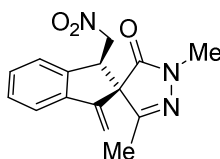

**3h** was obtained after flash chromatography (SiO<sub>2</sub>, *n*-pentane/EtOAc 5:1) as off-white solid (77 mg, 90%, d.r. >20:1). **Molecular formula:** C<sub>15</sub>H<sub>15</sub>N<sub>3</sub>O<sub>3</sub>. **Molecular mass:** 285.30 g mol<sup>-1</sup>. **R<sub>f</sub>** (*n*-pentane/EtOAc 5:1) = 0.23. **Mp:** 101-104 °C. **HPLC:** IA, 7/3 *n*-heptane/EtOH, 0.7 mL/min, λ = 254 nm, τ<sub>Minor</sub> = 13.4 min, τ<sub>Major</sub> = 10.1 min. **OR:** [α]<sub>D</sub><sup>20</sup> = -118.6 (*c* = 0.5, CHCl<sub>3</sub>, 93% *ee*). **<sup>1</sup>H NMR** (600 MHz, CDCl<sub>3</sub>): δ = 1.93 (s, 3 H, CH<sub>3</sub>), 3.30 (s, 3 H, CH<sub>3</sub>), 4.22 (dd, *J* = 4.2 Hz, *J* = 10.3 Hz, 1 H, CH), 4.75 (dd, *J* = 4.2 Hz, *J* = 15.1 Hz, 1 H, CH<sub>2</sub>), 4.88 (d, *J* = 1.1 Hz, 1 H, CH<sub>ol</sub>), 5.22 (dd, *J* = 10.3 Hz, *J* = 15.1 Hz, 1 H, CH<sub>2</sub>), 5.67 (d, *J* = 1.3 Hz, 1 H, CH<sub>ol</sub>), 7.24-7.28 (m, 1 H, CH<sub>Ar</sub>), 7.35-7.40 (m, 1 H, CH<sub>Ar</sub>), 7.56-7.60 (m, 2 H, CH<sub>Ar</sub>) ppm. **<sup>13</sup>C NMR** (151 MHz, CDCl<sub>3</sub>): δ = 13.4 (q), 31.4 (q), 44.9 (d), 64.3 (s), 74.8 (t), 106.7 (t), 122.2 (d), 124.4 (d), 129.3 (d), 130.2 (d), 139.1 (s), 140.7 (s), 145.8 (s), 161.1 (s), 174.1 (s) ppm. **IR** (ATR): ν̄ = 3744, 3305, 3119, 3033, 2989, 2920, 2472, 2324, 2170, 2059, 1989, 1958, 1809, 1677, 1639, 1551, 1469, 1422, 1377, 1304, 1263, 1230, 1169, 1111, 1084, 1041, 1013, 958, 895, 787, 731, 679, 658 cm<sup>-1</sup>. **MS (EI<sup>+</sup>)** *m/z* (%): 286.1 (22), 285.0 (100) [M]<sup>+</sup> = [C<sub>15</sub>H<sub>15</sub>N<sub>3</sub>O<sub>3</sub>]<sup>+</sup>, 239.1 (32) [M-HNO<sub>2</sub>]<sup>+</sup> = [C<sub>15</sub>H<sub>14</sub>N<sub>2</sub>O]<sup>+</sup>, 238.1 (60), 237.1 (23), 210.1 (21), 209.0 (43), 197.0 (22), 196.0 (79), 195.0 (44), 182.0 (15), 181.0 (13), 180.0 (13), 169.0 (17), 168.0 (20), 167.0 (33), 166.0 (23), 164.9 (23), 153.0 (21), 151.9 (30), 141.0 (28), 140.0 (15), 138.9 (26), 128.0 (15), 127.0 (15), 114.9 (42). **MS (CI<sup>+</sup>, methane)** *m/z* (%): 314.1 (12) [M+C<sub>2</sub>H<sub>5</sub>]<sup>+</sup> = [C<sub>17</sub>H<sub>20</sub>N<sub>3</sub>O<sub>3</sub>]<sup>+</sup>, 286.1 (100) [M+H]<sup>+</sup> = [C<sub>15</sub>H<sub>16</sub>N<sub>3</sub>O<sub>3</sub>]<sup>+</sup>. **HR-MS (ESI<sup>+</sup>):** calc. for [M+Na]<sup>+</sup> = [C<sub>15</sub>H<sub>15</sub>NaN<sub>3</sub>O<sub>3</sub>]<sup>+</sup>: 308.1006; found: 308.1000.

**(2*R*,3*R*)-1'-Methyl-1-methylene-3-(nitromethyl)-3'-(trifluoromethyl)-1,3-dihydrospiro[indene-2,4'-pyrazole]-5'(1'*H*)-on (3i)**

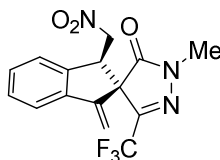

**3i** was obtained after flash chromatography (SiO<sub>2</sub>, *n*-pentane/EtOAc 6:1) as off-white solid (99 mg, 97%, d.r. 10:1). **Molecular formula:** C<sub>15</sub>H<sub>12</sub>F<sub>3</sub>N<sub>3</sub>O<sub>3</sub>. **Molecular mass:** 339.27 g mol<sup>-1</sup>. **R<sub>f</sub>** (*n*-pentane/EtOAc 6:1) = 0.46. **Mp:** 126-130°C. **SFC:** R-Whelk, CO<sub>2</sub>/EtOH 97:3, 4.0 mL/min, λ = 254 nm, τ<sub>Minor</sub> = 3.4 min, τ<sub>Major</sub> = 3.8 min. **OR:** [α]<sub>D</sub><sup>20</sup> = -64.2 (*c* = 0.5, CHCl<sub>3</sub>, 42% *ee*). **<sup>1</sup>H NMR** (400 MHz, CDCl<sub>3</sub>): δ = 3.41 (s, 3 H, CH<sub>3</sub>, a), 3.53 (s, 0.3 H, CH<sub>3</sub>, b), 4.50 (dd, *J* = 3.4 Hz, *J* = 11.2 Hz, 1.0 H, CH, a), 4.54-4.57 (m, 0.1 H, CH, b), 4.64 (dd, *J* = 11.0 Hz, *J* = 15.2 Hz, 0.1 H, CH<sub>2</sub>, b), 4.79 (dd, *J* = 3.5 Hz, *J* = 15.4 Hz, 1 H, CH<sub>2</sub>, a), 4.93 (d, *J* = 1.9 Hz, 1 H, CH<sub>ol</sub>, a), 4.94 (d, *J* = 1.9 Hz, 0.1 H,

$CH_{ol}$ , b), 5.00 (dd,  $J = 4.1$  Hz,  $J = 15.3$  Hz, 0.1 H,  $CH_2$ , b), 5.27 (dd,  $J = 11.3$  Hz,  $J = 15.5$  Hz, 1.0 H,  $CH_2$ , a), 5.72 (d,  $J = 1.9$  Hz, 1.1 H,  $CH_{ol}$ , a+b), 7.17-7.31 (m, 1.5 H,  $CH_{Ar}$ ), 7.35-7.45 (m, 2.2 H,  $CH_{Ar}$ ), 7.53-7.64 (m, 2 H,  $CH_{Ar}$ ) ppm.  $^{13}C\{^{19}F\}$  NMR (101 MHz,  $CDCl_3$ , major diastereomer):  $\delta = 32.1$  (q), 44.8 (d), 61.7 (s), 72.8 (t), 107.1 (t), 119.3 (s), 122.4 (d), 124.4 (d), 129.6 (d), 130.5 (d), 138.4 (s), 139.9 (s), 144.3 (s), 149.5 (s), 173.7 (s) ppm.  $^{19}F\{^1H\}$  NMR (376 MHz,  $CDCl_3$ ):  $\delta = -63.6$  (s) ppm. IR (ATR):  $\tilde{\nu} = 3013, 2925, 2662, 2333, 2090, 2013, 1811, 1719, 1638, 1550, 1472, 1409, 1472, 1409, 1340, 1247, 1170, 1133, 1026, 970, 903, 861, 781, 744, 714$   $cm^{-1}$ . MS ( $EI^+$ )  $m/z$  (%): 339.0 (24)  $[M]^+$  =  $[C_{15}H_{12}F_3N_3O_3]^+$ , 293.1 (23), 292.0 (100)  $[M-HNO_2]^+$  =  $[C_{15}H_{11}F_3N_2O]^+$ , 263.0 (14), 250.0 (40), 249.0 (22), 200.9 (11). MS ( $CI^+$ , methane)  $m/z$  (%): 286.1 (100)  $[M+H]^+$  =  $[C_{15}H_{13}F_3N_3O_3]^+$ . HR-MS ( $ESI^+$ ): calc. for  $[M+Na]^+$  =  $[C_{15}H_{12}F_3NaN_3O_3]^+$ : 362.0723; found: 362.0705.

**(2*R*,3*R*)-5-Methoxy-1-methylene-3-(nitromethyl)-1',3'-diphenyl-1,3-dihydrospiro[indene-2,4'-pyrazole]-5'(1'*H*)-on (3j)**

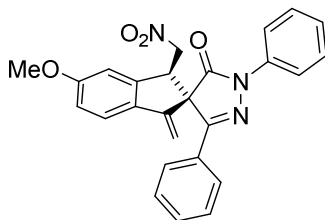

**3j** was obtained after flash chromatography ( $SiO_2$ ,  $n$ -pentane/EtOAc 6:1) as off-white solid (120 mg, 91%, d.r. 10:1). **Molecular formula**:  $C_{26}H_{21}N_3O_4$ . **Molecular mass**: 439.47  $g\ mol^{-1}$ . **R<sub>f</sub>** ( $n$ -pentane/EtOAc 6:1) = 0.27. **Mp**: 146-150 °C. **HPLC**: IB, 7/3  $n$ -heptane/EtOH, 1.0 mL/min,  $\lambda = 254$  nm,  $\tau_{Minor} = 5.6$  min,  $\tau_{Major} = 9.6$  min. **OR**:  $[\alpha]_D^{20} = +3.33$  ( $c = 0.5$ ,  $CHCl_3$ , 92% *ee*).  $^1H$  NMR (600 MHz,  $CDCl_3$ ):  $\delta = 3.87$  (s, 3.2 H,  $CH_3$ , a+b), 4.46-4.50 (m, 0.1 H,  $CH_2$ , b), 4.49 (dd,  $J = 4.0$  Hz,  $J = 10.6$  Hz, 1.0 H,  $CH$ , a), 4.74-4.69 (m, 0.2 H,  $CH$ ,  $CH_2$ , b), 4.86 (dd,  $J = 4.0$  Hz,  $J = 15.0$  Hz, 1.0 H,  $CH_2$ , a), 4.94 (d,  $J = 1.6$  Hz, 1.0 H,  $CH_{ol}$ , a), 4.95 (d,  $J = 1.6$  Hz, 0.1 H,  $CH_{ol}$ , b), 5.35 (dd,  $J = 10.7$  Hz,  $J = 15.0$  Hz, 1.0 H,  $CH_2$ , a), 5.56 (d,  $J = 1.6$  Hz, 1.0 H,  $CH_{ol}$ , a), 5.59 (d,  $J = 1.6$  Hz, 0.2 H,  $CH_{ol}$ , b), 6.72-6.74 (m, 0.1 H,  $CH_{Ar}$ ), 6.75 (d,  $J = 1.4$  Hz, 1.0,  $CH_{Ar}$ ), 7.02 (dd,  $J = 1.8$  Hz,  $J = 8.6$  Hz, 1.0 H,  $CH_{Ar}$ ), 7.22-7.30 (m, 1.6 H,  $CH_{Ar}$ ), 7.32-7.38 (m, 2.0 H,  $CH_{Ar}$ ), 7.57-7.65 (m, 3.0 H,  $CH_{Ar}$ ), 7.94-8.00 (m, 1.9 H,  $CH_{Ar}$ ), 8.05 (d,  $J = 7.8$  Hz, 0.2 H,  $CH_{Ar}$ ) ppm.  $^{13}C$  NMR (151 MHz,  $CDCl_3$ , major diastereomer):  $\delta = 46.3$  (d), 55.9 (q), 65.0 (s), 73.4 (t), 104.2 (t), 109.1 (d), 116.4 (d), 119.8 (d, 2 C), 123.7 (d), 125.8 (d), 127.0 (d, 2 C), 129.1 (d, 4 C), 129.4 (s), 130.8 (d), 131.7 (s), 137.9 (s), 142.7 (s), 146.5 (s), 160.4 (s), 161.8 (s), 173.1 (s) ppm. IR (ATR):  $\tilde{\nu} = 3843, 3641, 3453, 3317, 2940, 2701, 2492, 2294, 2051, 1988, 1910, 1736, 1596, 1549, 1489, 1367, 1218, 1138, 1085, 1023, 846, 757, 686$   $cm^{-1}$ . MS ( $EI^+$ )  $m/z$  (%): 440.1 (16), 439.1 (49)  $[M]^+$  =  $[C_{26}H_{21}N_3O_4]^+$ , 394.2 (10), 393.2 (35)  $[M-HNO_2]^+$  =  $[C_{26}H_{20}N_2O_2]^+$ , 392.2 (38), 391.2 (12), 288.1 (10), 287.1 (29), 273.1 (18), 260.1 (21), 259.1 (19), 258.1 (13), 245.2 (12), 231.1 (13), 230.2 (15), 215.2 (24), 202.1 (18), 199.2 (25), 189.1 (11), 171.1 (14), 128.1 (26), 127.1 (13), 119.1 (18), 115.1 (11), 105.2 (13), 91.2 (43), 77.2 (100). MS

(**Cl**<sup>+</sup>, methane) *m/z* (%): 468.1 (10) [M+C<sub>2</sub>H<sub>5</sub>]<sup>+</sup> = [C<sub>28</sub>H<sub>26</sub>N<sub>3</sub>O<sub>4</sub>]<sup>+</sup>, 440.1 (100) [M+H]<sup>+</sup> = [C<sub>26</sub>H<sub>22</sub>N<sub>3</sub>O<sub>4</sub>]<sup>+</sup>. **HR-MS (ESI**<sup>+</sup>): calc. for [M+Na]<sup>+</sup> = [C<sub>26</sub>H<sub>21</sub>NaN<sub>3</sub>O<sub>4</sub>]<sup>+</sup>: 462.1424; found: 462.1421.

**(2*R*,3*R*)-5-Fluoro-1-methylene-3-(nitromethyl)-1',3'-diphenyl-1,3-dihydrospiro[indene-2,4'-pyrazole]-5'(1'*H*)-on (3k)**

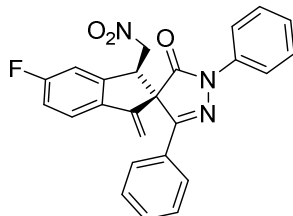

**3k** was obtained after flash chromatography (SiO<sub>2</sub>, *n*-pentane/EtOAc 6:1) as off-white solid (127 mg, 99%, d.r. 10:1). **Molecular formular:** C<sub>25</sub>H<sub>18</sub>FN<sub>3</sub>O<sub>3</sub>. **Molecular mass:** 427.44 g mol<sup>-1</sup>. **R<sub>f</sub>** (*n*-pentane/EtOAc 6:1) = 0.54. **Mp:** 142-146 °C. **HPLC:** IA, 7/3 *n*-heptane/EtOH, 0.7 mL/min, λ = 254 nm, τ<sub>Minor</sub> = 13.2 min, τ<sub>Major</sub> = 10.0 min. **OR:** [α]<sub>D</sub><sup>20</sup> = +12.9 (*c* = 0.5, CHCl<sub>3</sub>, 96% *ee*). **<sup>1</sup>H NMR** (600 MHz, CDCl<sub>3</sub>): δ = 4.50-4.43 (m, 0.1 H, CH<sub>2</sub>, b), 4.52 (dd, *J* = 3.8 Hz, *J* = 10.6 Hz, 1.0 H, CH, a), 4.73 (dd, *J* = 4.8 Hz, *J* = 15.4 Hz, 0.3 H, CH<sub>2</sub>, b), 4.73 (dd, *J* = 5.1 Hz, *J* = 10.1 Hz, 0.1 H, CH, b), 5.05 (d, *J* = 1.5 Hz, 1.0 H, CH<sub>ol</sub>, a), 5.08 (d, *J* = 1.6 Hz, 0.1 H, CH<sub>ol</sub>, b), 5.32 (dd, *J* = 10.5 Hz, *J* = 15.0 Hz, 1.0 H, CH<sub>2</sub>, a), 5.66 (d, *J* = 1.7 Hz, 1.0 H, CH<sub>ol</sub>, a), 5.71 (d, *J* = 1.7 Hz, 0.1 H, CH<sub>ol</sub>, b), 6.95-7.01 (m, 1.1 H, CH<sub>Ar</sub>), 7.18 (dt, *J* = 2.3 Hz, *J* = 8.6 Hz, 1.1 H, CH<sub>Ar</sub>), 7.22-7.32 (m, 1.7 H, CH<sub>Ar</sub>), 7.32-7.39 (m, 2.0 H, CH<sub>Ar</sub>), 7.39-7.55 (m, 3.3 H, CH<sub>Ar</sub>), 7.55-7.63 (m, 1.9 H, CH<sub>Ar</sub>), 7.67 (d, *J* = 5.1 Hz, *J* = 8.6 Hz, 1.0 H, CH<sub>Ar</sub>) ppm. **<sup>13</sup>C{<sup>19</sup>F} NMR** (101 MHz, CDCl<sub>3</sub>, major diastereomer): δ = 46.1 (d), 65.0 (s), 73.1 (t), 106.4 (t), 111.8 (d), 117.4 (d), 119.9 (d, 2 C), 124.1 (d), 126.6 (d), 127.0 (d, 2 C), 129.1 (d, 4 C), 129.3 (s), 130.9 (d), 135.0 (s), 137.8 (s), 143.0 (s), 145.9 (s), 160.0 (s), 164.2 (s), 172.7 (s) ppm. **<sup>19</sup>F NMR** (376 MHz, CDCl<sub>3</sub>): δ = -109.37 (dd, *J* = 8.3 Hz, *J* = 13.5 Hz) ppm. **IR (ATR):** ν̄ = 3846, 3646, 3393, 3064, 2925, 2695, 2467, 2301, 2106, 1898, 1711, 1550, 1488, 1374, 1305, 1232, 1134, 892, 758, 683 cm<sup>-1</sup>. **MS (EI**<sup>+</sup>) *m/z* (%): 428.0 (49), 427.0 (100) [M]<sup>+</sup> = [C<sub>25</sub>H<sub>18</sub>FN<sub>3</sub>O<sub>3</sub>]<sup>+</sup>, 381.1 (31), 380.0 (26), 379.0 (14), 351.1 (18), 275.1 (18), 262.1 (31), 261.1 (24), 260.0 (11), 248.1 (30), 247.0 (12), 246.0 (14), 233.1 (17), 187.0 (10), 159.1 (22), 133.1 (13), 105.1 (18), 91.1 (28), 77.2 (29). **MS (Cl**<sup>+</sup>, methane) *m/z* (%): 456.1 (3) [M+C<sub>2</sub>H<sub>5</sub>]<sup>+</sup> = [C<sub>27</sub>H<sub>23</sub>FN<sub>3</sub>O]<sup>+</sup>, 428.1 (34) [M+H]<sup>+</sup> = [C<sub>25</sub>H<sub>19</sub>FN<sub>3</sub>O]<sup>+</sup>. **HR-MS (ESI**<sup>+</sup>): calc. for [M+H]<sup>+</sup> = [C<sub>25</sub>H<sub>19</sub>FN<sub>3</sub>O<sub>3</sub>]<sup>+</sup>: 428.1405; found: 428.1398.

**(6*R*, 7*R*)-3'-Ethyl-5-methylene-7-(nitromethyl)-1'-(*p*-tolyl)-5,7-dihydrospiro[indeneo[5,6*d*][1,3]dioxole-6,4'-pyrazole]-5'(1'*H*)-on (3l)**

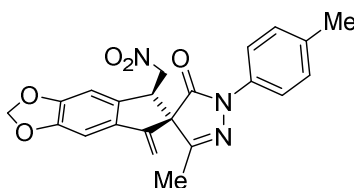

**3l** was obtained after flash chromatography (SiO<sub>2</sub>, *n*-pentane/EtOAc 6:1) as colorless solid (33 mg, 27%, d.r. 15:1). **Molecular formular:** C<sub>22</sub>H<sub>19</sub>N<sub>3</sub>O<sub>5</sub>. **Molecular mass:** 405.41 g mol<sup>-1</sup>. **R<sub>f</sub>** (*n*-pentane/EtOAc 6:1) = 0.19. **Mp:** 141-144 °C. **HPLC:** AD, 6/4 *n*-heptane/*i*-PrOH, 1.0 mL/min, λ = 254 nm, τ<sub>Minor</sub> = 15.5 min, τ<sub>Major</sub> = 9.3 min. **OR:** [α]<sub>D</sub><sup>20</sup> = -80.9 (*c* = 0.4, CHCl<sub>3</sub>, 93% *ee*). **<sup>1</sup>H NMR** (600 MHz, CDCl<sub>3</sub>, major diastereomer): δ = 2.02 (s, 3 H, CH<sub>3</sub>), 2.34 (s, 3 H, CH<sub>3</sub>), 4.16 (dd, *J* = 4.4 Hz, *J* = 10.0 Hz, 1 H, CH), 4.69 (dd, *J* = 4.4 Hz, *J* = 15.1 Hz, 1 H, CH<sub>2</sub>), 4.81 (d, *J* = 1.4 Hz, 1 H, CH<sub>ol</sub>), 5.22 (dd, *J* = 10.0 Hz, *J* = 15.1 Hz, 1 H, CH<sub>2</sub>), 5.44 (d, *J* = 1.5 Hz, 1 H, CH<sub>ol</sub>), 6.04 (dd, *J* = 0.8 Hz, *J* = 6.5 Hz, 2 H, CH<sub>2</sub>), 6.67 (s, 1 H, CH<sub>Ar</sub>), 6.96 (s, 1 H, CH<sub>Ar</sub>), 7.20 (d, *J* = 8.3 Hz, 2 H, CH<sub>Ar</sub>), 7.70 (d, *J* = 8.5 Hz, 2 H, CH<sub>Ar</sub>), ppm. **<sup>13</sup>C NMR** (151 MHz, CDCl<sub>3</sub>, major diastereomer): δ = 13.6 (q), 21.1 (q), 44.8 (d), 66.1 (s), 73.8 (t), 101.7 (d), 102.3 (t), 104.1 (d), 104.6 (t), 119.7 (d, 2 C), 129.6 (d, 2 C), 133.3 (s), 134.8 (s), 135.3 (s), 135.4 (s), 145.5 (s), 149.6 (s), 150.4 (s), 161.5 (s), 172.2 (s) ppm. **IR** (ATR): ν̄ = 3852, 3643, 3380, 2918, 2714, 2471, 2264, 2062, 1901, 1697, 1624, 1500, 1292, 1112, 1032, 935, 860, 668 cm<sup>-1</sup>. **MS (EI<sup>+</sup>)** *m/z* (%): 405.1 (8) [M]<sup>+</sup> = [C<sub>22</sub>H<sub>19</sub>N<sub>3</sub>O<sub>5</sub>]<sup>+</sup>, 211.0 (15), 185.0 (13), 153.0 (22), 152.0 (25), 141.0 (10), 139.0 (19), 133.0 (12), 132.0 (12), 128.1 (16), 127.0 (31), 126.0 (18), 115.1 (20), 106.1 (12), 105.1 (23), 104.0 (20), 91.1 (100), 78.2 (15), 77.2 (23), 65.2 (41), 63.2 (12). **MS (CI<sup>+</sup>, methane)** *m/z* (%): 434.2 (8) [M+C<sub>2</sub>H<sub>5</sub>]<sup>+</sup> = [C<sub>24</sub>H<sub>24</sub>N<sub>3</sub>O<sub>5</sub>]<sup>+</sup>, 406.1 (100) [M+H]<sup>+</sup> = [C<sub>22</sub>H<sub>20</sub>N<sub>3</sub>O<sub>5</sub>]<sup>+</sup>. **HR-MS (ESI<sup>+</sup>):** calc. for [M+Na]<sup>+</sup> = [C<sub>22</sub>H<sub>19</sub>NaN<sub>3</sub>O<sub>5</sub>]<sup>+</sup>: 428.1217; found: 428.1214.

**(2*R*,3*R*)-5-Chloro-3'-methyl-1-methylene-3-(nitromethyl)-1'-(*p*-tolyl)-1,3-dihydrospiro[indene-2,4'-pyrazole]-5'(1'*H*)-on (3m)**

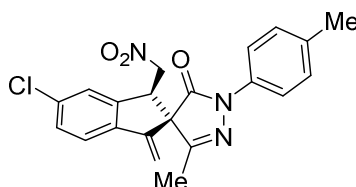

**3m** was obtained after flash chromatography (SiO<sub>2</sub>, *n*-pentane/EtOAc 6:1) as colorless solid (104 mg, 87%, d.r. 10:1). **Molecular formular:** C<sub>21</sub>H<sub>18</sub>ClN<sub>3</sub>O<sub>3</sub>. **Molecular mass:** 395.84 g mol<sup>-1</sup>. **R<sub>f</sub>** (*n*-pentane/EtOAc 6:1) = 0.51. **Mp:** 61-65 °C. **HPLC:** IC, 7/3 *n*-heptane/*i*-PrOH, 1.0 mL/min, λ = 254 nm, τ<sub>Minor</sub> = 7.7 min, τ<sub>Major</sub> = 21.9 min. **OR:** [α]<sub>D</sub><sup>20</sup> = -41.6 (*c* = 0.5, CHCl<sub>3</sub>, 99% *ee*). **<sup>1</sup>H NMR** (600 MHz, CDCl<sub>3</sub>): δ = 1.94 (s, 0.3 H, CH<sub>3</sub>, b), 2.04 (s, 3.0 H, CH<sub>3</sub>, a), 2.35 (s, 3.0 H, CH<sub>3</sub>, a), 2.36 (s, 3.0 H, CH<sub>3</sub>, b), 4.28 (dd, *J* = 4.3 Hz, *J* = 10.1 Hz, 1.0 H, CH, a), 4.55 (dd, *J* = 8.8 Hz, *J* = 14.5 Hz, 0.1 H, CH<sub>2</sub>, b), 4.65-4.68 (m, 0.1 H, CH, b), 4.77 (dd, *J* = 4.3 Hz, *J* = 15.2 Hz, 1.0 H, CH<sub>2</sub>, a), 4.87 (dd, *J* = 6.1 Hz, *J* = 14.5 Hz, 0.1 H, CH<sub>2</sub>, b), 4.99 (d, *J* = 1.5 Hz, 1.0 H, CH<sub>ol</sub>, a), 5.01 (d, *J* = 1.2 Hz, 0.1 H, CH<sub>ol</sub>, b), 5.25 (dd, *J* = 10.2 Hz, *J* = 15.2 Hz, 1.0 H, CH<sub>2</sub>, a), 5.68 (d, *J* = 1.5 Hz, 1.2 H, CH<sub>ol</sub>, a+b), 7.20 (d, *J* = 8.4 Hz, 2.0 H, CH<sub>Ar</sub>), 7.22-7.25 (m, 0.4 H, CH<sub>Ar</sub>), 7.25-7.27 (m, 1.3 H, CH<sub>Ar</sub>), 7.37 (dd, *J* = 1.1 Hz, *J* = 8.3 Hz, 1.1 H, CH<sub>Ar</sub>), 7.49-7.54 (m, 1.2 H, CH<sub>Ar</sub>), 7.70 (d, *J* = 8.5 Hz, 2.0 H, CH<sub>Ar</sub>), 7.78 (d, *J* = 8.5 Hz, 0.2 H, CH<sub>Ar</sub>) ppm. **<sup>13</sup>C NMR** (151 MHz, CDCl<sub>3</sub>, major diastereomer): δ = 13.7 (q), 21.1 (q), 44.8 (d), 65.9 (s), 73.4 (t), 107.7 (t), 119.7 (d, 2 C), 123.3 (d), 124.8 (d), 129.6 (d), 129.9 (d, 2 C),

135.2 (s), 135.5 (s), 136.2 (s), 137.6 (s), 142.3 (s), 144.8 (s), 161.1 (s), 171.9 (s) ppm. **IR** (ATR):  $\tilde{\nu}$  = 3863, 3652, 3437, 2927, 2716, 2488, 2297, 2092, 1902, 1700, 1543, 1367, 1295, 1212, 1089, 1000, 892, 821, 685  $\text{cm}^{-1}$ . **MS** (**EI**<sup>+</sup>) *m/z* (%): 395.1 (10)  $[\text{M}, ^{35}\text{Cl}]^+ = [\text{C}_{21}\text{H}_{18}\text{ClN}_3\text{O}_3]^+$ , 181.0 (12), 174.9 (24), 166.0 (18), 165.0 (40), 152.0 (27), 150.9 (13), 148.9 (16), 140.0 (16), 139.0 (44), 132.0 (12), 128.0 (13), 127.0 (12), 126.0 (13), 106.1 (24), 105.0 (37), 104.0 (20), 91.1 (100), 78.2 (15), 77.1 (17), 65.2 (40). **MS** (**CI**<sup>+</sup>, **methane**) *m/z* (%): 424.1 (11)  $[\text{M}+\text{C}_2\text{H}_5, ^{35}\text{Cl}]^+ = [\text{C}_{23}\text{H}_{23}\text{ClN}_3\text{O}_3]^+$ , 398.1 (41)  $[\text{M}+\text{H}, ^{37}\text{Cl}]^+ = [\text{C}_{22}\text{H}_{19}\text{ClN}_3\text{O}_3]^+$ , 396.1 (100)  $[\text{M}+\text{H}, ^{35}\text{Cl}]^+ = [\text{C}_{22}\text{H}_{19}\text{ClN}_3\text{O}_3]^+$ . **HR-MS** (**ESI**<sup>+</sup>): calc. for  $[\text{M}+\text{Na}, ^{35}\text{Cl}]^+ = [\text{C}_{21}\text{H}_{18}\text{ClNaN}_3\text{O}_3]^+$ : 418.0929; found: 418.0914.

**(2R,3R)-3'-Methyl-1-methylene-3-(nitromethyl)-1'-(p-tolyl)-1,3-dihydrospiro[cyclopenta-[a]naphthalen-2,4'-pyrazole]-5'(1'H)-on (3n)**

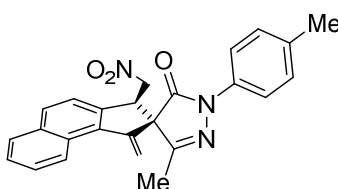

**3n** was obtained after flash chromatography ( $\text{SiO}_2$ , *n*-pentane/EtOAc 6:1) as colorless solid (66 mg, 54%, d.r. 10:1). **Molecular formular:**  $\text{C}_{25}\text{H}_{21}\text{N}_3\text{O}_3$ . **Molecular mass:** 411.46  $\text{g mol}^{-1}$ . **R<sub>f</sub>** (*n*-pentane/EtOAc 6:1) = 0.32. **Mp:** 165-170 °C. **HPLC:** AS, 9/1 *n*-heptane/EtOH, 0.7 mL/min,  $\lambda$  = 254 nm,  $\tau_{\text{Minor}}$  = 20.4 min,  $\tau_{\text{Major}}$  = 13.8 min. **OR:**  $[\alpha]_D^{20} = -167.7$  ( $c = 0.5$ ,  $\text{CHCl}_3$ , 99% *ee*). **<sup>1</sup>H NMR** (600 MHz,  $\text{CDCl}_3$ ):  $\delta$  = 1.91 (s, 0.3 H,  $\text{CH}_3$ , b), 2.01 (s, 3.0 H,  $\text{CH}_3$ , b), 2.36 (s, 3.0 H,  $\text{CH}_3$ , a), 2.37 (s, 3.0 H,  $\text{CH}_3$ , a), 4.39 (dd,  $J = 4.1$  Hz,  $J = 10.1$  Hz, 1.0 H, CH, a), 4.57 (dd,  $J = 8.7$  Hz,  $J = 14.5$  Hz, 0.1 H,  $\text{CH}_2$ , b), 4.79-4.83 (m, 0.1 H, CH, b), 4.84 (dd,  $J = 4.1$  Hz,  $J = 15.2$  Hz, 1.0 H,  $\text{CH}_2$ , a), 4.98 (dd,  $J = 6.2$  Hz,  $J = 14.6$  Hz, 0.1 H,  $\text{CH}_2$ , b), 5.23 (s, 1.0 H,  $\text{CH}_{\text{ol}}$ , a), 5.27 (s, 0.1 H,  $\text{CH}_{\text{ol}}$ , b), 5.31 (dd,  $J = 10.1$  Hz,  $J = 15.1$  Hz, 1.0 H,  $\text{CH}_2$ , a), 6.09 (s, 0.1 H,  $\text{CH}_{\text{ol}}$ , b), 6.13 (s, 1.0 H,  $\text{CH}_{\text{ol}}$ , a), 7.18-7.25 (m, 2.2 H,  $\text{CH}_{\text{Ar}}$ ), 7.29-7.34 (m, 0.2 H,  $\text{CH}_{\text{Ar}}$ ), 7.36 (d,  $J = 8.4$  Hz, 1.0 H,  $\text{CH}_{\text{Ar}}$ ), 7.59 (t,  $J = 7.5$  Hz, 1.0 H,  $\text{CH}_{\text{Ar}}$ ), 7.65 (t,  $J = 7.6$  Hz, 1.1 H,  $\text{CH}_{\text{Ar}}$ ), 7.74 (d,  $J = 8.3$  Hz, 1.9 H,  $\text{CH}_{\text{Ar}}$ ), 7.84 (d,  $J = 8.3$  Hz, 0.2 H,  $\text{CH}_{\text{Ar}}$ ), 7.90 (d,  $J = 8.4$  Hz, 1.1 H,  $\text{CH}_{\text{Ar}}$ ), 7.95 (d,  $J = 8.2$  Hz, 1.1 H,  $\text{CH}_{\text{Ar}}$ ) ppm. **<sup>13</sup>C NMR** (151 MHz,  $\text{CDCl}_3$ , major diastereomer):  $\delta$  = 13.9 (q), 21.2 (q), 45.4 (d), 66.9 (s), 73.9 (t), 111.3 (t), 119.7 (d, 2 C), 121.3 (d), 124.9 (d), 126.8 (d), 128.4 (d), 129.6 (d, 3 C), 129.6 (s), 131.9 (d), 134.0 (s), 134.4 (s), 135.4 (s, 2 C), 140.2 (s), 146.5 (s), 161.2 (s), 172.2 (s) ppm. **IR** (ATR):  $\tilde{\nu}$  = 3865, 3656, 3385, 2925, 2724, 2465, 2297, 2059, 1912, 1781, 1699, 1614, 1541, 1364, 1307, 1212, 1132, 1013, 964, 822, 751  $\text{cm}^{-1}$ . **MS** (**EI**<sup>+</sup>) *m/z* (%): 411.1 (17)  $[\text{M}]^+ = [\text{C}_{25}\text{H}_{21}\text{N}_3\text{O}_3]^+$ , 217.1 (14), 202.1 (19), 191.1 (11), 190.0 (17), 189.0 (32), 165.0 (10), 119.0 (14), 106.1 (14), 105.1 (24), 104.1 (16), 91.1 (100), 78.2 (12), 77.1 (13), 65.3 (33). **MS** (**CI**<sup>+</sup>, **methane**) *m/z* (%): 439.5 (12)  $[\text{M}+\text{C}_2\text{H}_5]^+ = [\text{C}_{27}\text{H}_{26}\text{N}_3\text{O}_3]^+$ , 411.6 (100)  $[\text{M}+\text{H}]^+ = [\text{C}_{25}\text{H}_{22}\text{N}_3\text{O}_3]^+$ . **HR-MS** (**ESI**<sup>+</sup>): calc. for  $[\text{M}+\text{Na}]^+ = [\text{C}_{25}\text{H}_{21}\text{NaN}_3\text{O}_3]^+$ : 434.1475; found: 434.1472.



**(2*R*,3*R*,*Z*)-1-(Cyclohexylmethylene)-3'-methyl-3-(nitromethyl)-1'-phenyl-1,3-dihydrospiro[indene-2,4'-pyrazole]-5'(1'*H*)-one (3o)**

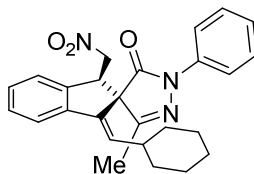

**3o** was obtained after flash chromatography (SiO<sub>2</sub>, *n*-pentane/EtOAc 4:1) as off-white solid (105 mg, 81%, d.r. 7:1). **Molecular formular:** C<sub>26</sub>H<sub>27</sub>N<sub>3</sub>O<sub>3</sub>. **Molecular mass:** 429.52 g mol<sup>-1</sup>. **R<sub>f</sub>** (*n*-pentane/EtOAc 6:1) = 0.55. **Mp:** 133-139 °C. **HPLC:** AD, 6/4 *n*-heptane/*i*-PrOH, 1.0 mL/min, λ = 254 nm, τ<sub>Minor</sub> = 13.5 min, τ<sub>Major</sub> = 10.9 min. **OR:** [α]<sub>D</sub><sup>20</sup> = -113.0 (*c* = 0.5, CHCl<sub>3</sub>, 91% *ee*). **<sup>1</sup>H NMR** (600 MHz, CDCl<sub>3</sub>): δ = 0.78-0.92 (m, 2.2 H, CH<sub>2</sub>), 0.98-1.12 (m, 5.1 H, CH<sub>2</sub>), 1.47-1.68 (m, 7.2 H, CH<sub>2</sub>), 1.80-1.88 (m, 1.3 H, CH), 1.95 (s, 0.4 H, CH<sub>3</sub>, b), 2.01 (s, 3.0 H, CH<sub>3</sub>, a), 4.26 (dd, *J* = 4.3 Hz, *J* = 9.8 Hz, 1.0 H, CH, a), 4.49 (dd, *J* = 8.0 Hz, *J* = 14.5 Hz, 0.2 H, CH<sub>2</sub>, b), 4.64 (dd, *J* = 4.3 Hz, *J* = 15.5 Hz, 1.0 H, CH<sub>2</sub>, a), 4.69 (t, *J* = 7.3 Hz, 0.2 H, CH, b), 4.86 (dd, *J* = 6.7 Hz, *J* = 14.5 Hz, 0.2 H, CH<sub>2</sub>, b), 5.23 (dd, *J* = 9.8 Hz, *J* = 15.5 Hz, 1.0 H, CH<sub>2</sub>, a), 6.03 (d, *J* = 10.6 Hz, 0.2 H, CH<sub>ol</sub>, b), 6.07 (d, *J* = 10.8 Hz, 1.0 H, CH<sub>ol</sub>, a), 7.14 (d, *J* = 7.6 Hz, 0.3 H, CH<sub>Ar</sub>), 7.19-7.25 (m, 2.2 H, CH<sub>Ar</sub>), 7.29 (dt, *J* = 0.6 Hz, *J* = 7.6 Hz, 1.2 H, CH<sub>Ar</sub>), 7.35 (t, *J* = 7.5 Hz, 1.2 H, CH<sub>Ar</sub>), 7.38-7.47 (m, 2.3 H, CH<sub>Ar</sub>), 7.48-7.54 (m, 1.1 H, CH<sub>Ar</sub>) ppm. **<sup>13</sup>C NMR** (151 MHz, CDCl<sub>3</sub>, major diastereomer): δ = 13.5 (q), 25.4 (t), 25.8 (t), 25.9 (t), 32.1 (t), 32.9 (t), 37.9 (d), 46.8 (d), 63.6 (s), 74.8 (t), 119.7 (d, 2 C), 121.1 (d), 124.6 (d), 125.7 (d), 129.1 (d, 3 C), 129.3 (d), 132.7 (d), 134.8 (s), 137.7 (s), 138.7 (s), 139.0 (s), 140.9 (s), 161.5 (s), 172.8 (s) ppm. **IR** (ATR): ν̄ = 3863, 3654, 3401, 2925, 2476, 2273, 2080, 1908, 1704, 1547, 1367, 1294, 1215, 1113, 999, 896, 827, 754 cm<sup>-1</sup>. **MS (EI<sup>+</sup>) *m/z* (%)**: 429.1 (4) [M]<sup>+</sup> = [C<sub>26</sub>H<sub>27</sub>N<sub>3</sub>O<sub>3</sub>]<sup>+</sup>, 287.1 (23), 211.1 (24), 187.0 (33), 181.1 (12), 180.0 (12), 179.0 (19), 178.0 (24), 167.0 (22), 166.0 (16), 165.0 (41), 155.1 (10), 153.0 (20), 152.0 (24), 141.1 (31), 129.1 (11), 128.0 (17), 127.0 (10), 119.0 (17), 107.1 (10), 105.1 (27), 93.2 (13), 92.1 (23), 91.1 (60), 83.2 (14), 82.2 (14), 81.2 (27), 79.2 (15), 78.2 (11), 77.1 (100), 67.2 (39), 65.2 (14), 55.2 (40). **MS (CI<sup>+</sup>, methane) *m/z* (%)**: 458.2 (9) [M+C<sub>2</sub>H<sub>5</sub>]<sup>+</sup> = [C<sub>28</sub>H<sub>32</sub>N<sub>3</sub>O<sub>3</sub>]<sup>+</sup>, 430.2 (100) [M+H]<sup>+</sup> = [C<sub>26</sub>H<sub>28</sub>N<sub>3</sub>O<sub>3</sub>]<sup>+</sup>. **HR-MS (ESI<sup>+</sup>)**: calc. for [M+Na]<sup>+</sup> = [C<sub>26</sub>H<sub>27</sub>NaN<sub>3</sub>O<sub>3</sub>]<sup>+</sup>: 452.1945; found: 452.1943.

**(1*R*,2*R*,*Z*)-3'-Methyl-1-(nitromethyl)-3-pentylidene-1'-phenyl-1,3-dihydrospiro[indene-2,4'-pyrazole]-5'(1'*H*)-one (3p)**

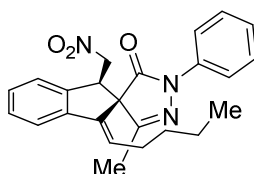

**3p** was obtained after flash chromatography (SiO<sub>2</sub>, *n*-pentane/EtOAc 4:1) as yellow oil (72 mg, 60%, d.r. 6:1). **Molecular formular:** C<sub>24</sub>H<sub>25</sub>N<sub>3</sub>O<sub>3</sub>. **Molecular mass:** 403.48 g mol<sup>-1</sup>. **R<sub>f</sub>** (*n*-pentane/EtOAc

6:1) = 0.56. **SFC:** R-Whelk, CO<sub>2</sub>/MeOH 99:1 zu 70:30, 4.0 mL/min,  $\lambda = 214.9$  nm,  $\tau_{Minor} = 17.0$  min,  $\tau_{Major} = 17.2$  min. **OR:**  $[\alpha]_D^{20} = -129.9$  ( $c = 0.4$ , CHCl<sub>3</sub>, 92% *ee*). **<sup>1</sup>H NMR** (600 MHz, CDCl<sub>3</sub>):  $\delta = 0.80$  (t,  $J = 7.4$  Hz, 3 H, CH<sub>3</sub>), 1.16-1.25 (m, 2 H, CH<sub>2</sub>), 1.32-1.42 (m, 2 H, CH<sub>2</sub>), 1.83-1.92 (m, 1 H, CH<sub>2</sub>), 1.93-1.99 (m, 1 H, CH<sub>2</sub>), 2.01 (s, 3 H, CH<sub>3</sub>), 4.28 (dd,  $J = 4.3$  Hz,  $J = 9.9$  Hz, 1 H, CH), 4.65 (dd,  $J = 4.3$  Hz,  $J = 15.5$  Hz, 1 H, CH<sub>2</sub>), 5.21 (dd,  $J = 9.8$  Hz,  $J = 15.4$  Hz, 1 H, CH<sub>2</sub>), 6.25 (t,  $J = 7.6$  Hz, 1 H, CH<sub>ol</sub>), 7.21-7.24 (m, 2 H, CH<sub>Ar</sub>), 7.30 (t,  $J = 7.4$  Hz, 1 H, CH<sub>Ar</sub>), 7.35 (t,  $J = 7.6$  Hz, 1 H, CH<sub>Ar</sub>), 7.42 (t,  $J = 7.9$  Hz, 2 H, CH<sub>Ar</sub>), 7.51 (d,  $J = 7.8$  Hz, 1 H, CH<sub>Ar</sub>), 7.79-7.84 (m, 2 H, CH<sub>Ar</sub>). **<sup>13</sup>C NMR** (151 MHz, CDCl<sub>3</sub>, major diastereomer):  $\delta = 13.6$  (q), 13.9 (q), 22.5 (t), 27.5 (t), 31.3 (t), 46.9 (d), 63.8 (s), 74.8 (t), 119.6 (d, 2 C), 121.0 (d), 124.6 (d), 125.7 (d), 127.6 (d), 129.1 (d, 3 C), 129.4 (d), 136.4 (s), 137.7 (s), 138.9 (s), 140.8 (s), 160.8 (s), 172.4 (s) ppm. **IR** (ATR):  $\tilde{\nu} = 3074, 2924, 2856, 2324, 2094, 1999, 1954, 1708, 1595, 1546, 1495, 1460.1411, 1360, 1284, 1234, 1203, 1119, 1061, 1027, 993, 970, 910, 878, 857, 757, 694, 656$  cm<sup>-1</sup>. **MS (EI<sup>+</sup>)**  $m/z$  (%): 403.1 (18) [M]<sup>+</sup> = [C<sub>24</sub>H<sub>25</sub>N<sub>3</sub>O<sub>3</sub>]<sup>+</sup>, 357.1 (21), 355.1 (10), 313.1 (17), 299.0 (13), 287.0 (19), 272.0 (23), 271.0 (21), 259.1 (11), 195.1 (11), 194.0 (23), 187.0 (64), 181.0 (26), 180.0 (17), 179.0 (16), 178.0 (23), 168.0 (12), 167.0 (21), 166.0 (23), 165.0 (54), 155.1 (15), 154.0 (17), 153.0 (45), 152.0 (51), 151.0 (0), 141.0 (32), 139.0 (14), 129.1 (12), 128.0 (24), 127.0 (19), 119.0 (18), 115.0 (30), 92.1 (16), 91.1 (46), 85.2 (10), 77.2 (100), 65.3 (10), 57.3 (24), 56.2 (12), 55.2 (24), 51.2 (13). **MS (CI<sup>+</sup>, methane)**  $m/z$  (%): 432.2 (16) [M+C<sub>2</sub>H<sub>5</sub>]<sup>+</sup> = [C<sub>26</sub>H<sub>30</sub>N<sub>3</sub>O<sub>3</sub>]<sup>+</sup>, 404.2 (100) [M+H]<sup>+</sup> = [C<sub>24</sub>H<sub>26</sub>N<sub>3</sub>O<sub>3</sub>]<sup>+</sup>. **HR-MS (ESI<sup>+</sup>):** calc. for [M+Na]<sup>+</sup> = [C<sub>24</sub>H<sub>25</sub>NaN<sub>3</sub>O<sub>3</sub>]<sup>+</sup>: 426.1788; found: 426.1788.

**(2R,3R)-1-((Z)-Benzylidene)-3'-methyl-3-(nitromethyl)-1'-phenyl-1,3-dihydrospiro[indene-2,4'-pyrazole]-5'(1'H)-one (4a)**

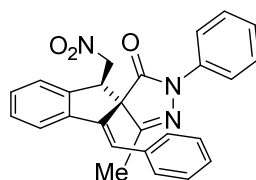

**4a** was obtained after flash chromatography (SiO<sub>2</sub>, *n*-pentane/EtOAc 4:1) as off-white solid (127 mg, 99%, d.r. 10:1). **Molecular formula:** C<sub>26</sub>H<sub>21</sub>N<sub>3</sub>O<sub>3</sub>. **Molecular mass:** 423.47 g mol<sup>-1</sup>. **Mp:** 156-158 °C. **R<sub>f</sub>** (*n*-pentane/EtOAc 6:1) = 0.34. **HPLC:** IC, 7/3 *n*-heptane/EtOH, 1.0 mL/min,  $\lambda = 214$  nm,  $\tau_{Minor} = 44.6$  min,  $\tau_{Major} = 31.9$  min. **OR:**  $[\alpha]_D^{20} = -168.5$  ( $c = 0.6$ , CHCl<sub>3</sub>, 90% *ee*). **<sup>1</sup>H NMR** (600 MHz, CDCl<sub>3</sub>):  $\delta = 1.95$  (s, 3 H, CH<sub>3</sub>), 4.30 (dd,  $J = 5.3$  Hz,  $J = 8.7$  Hz, 1 H, CH), 4.66 (dd,  $J = 5.3$  Hz,  $J = 15.1$  Hz, 1 H, CH<sub>2</sub>), 5.03 (dd,  $J = 8.8$  Hz,  $J = 15.1$  Hz, 1 H, CH<sub>2</sub>), 7.01-7.04 (m, 2 H, CH<sub>Ar</sub>, CH<sub>ol</sub>), 7.06-7.10 (m, 3 H, CH<sub>Ar</sub>), 7.17 (t,  $J = 7.4$  Hz, 1 H, CH<sub>Ar</sub>), 7.25-7.27 (m, 1 H, CH<sub>Ar</sub>), 7.33 (t,  $J = 7.9$  Hz, 2 H, CH<sub>Ar</sub>), 7.37-7.40 (m, 2 H, CH<sub>Ar</sub>), 7.44 (t,  $J = 7.6$  Hz, 1 H, CH<sub>Ar</sub>), 7.52 (d,  $J = 7.8$  Hz, 2 H, CH<sub>Ar</sub>), 7.68 (d,  $J = 7.7$  Hz, 1 H, CH<sub>Ar</sub>) ppm. **<sup>13</sup>C NMR** (151 MHz, CDCl<sub>3</sub>):  $\delta = 14.1$  (q), 47.6 (d), 64.9 (s), 75.0 (t), 119.5 (d, 2 C), 121.6 (d), 124.6 (d), 125.5 (d), 126.4 (d), 128.1 (d), 128.2 (d, 2 C), 128.3 (d, 2 C), 128.7 (d, 2 C), 129.6 (d), 130.0 (d), 135.3 (s), 137.5 (s), 138.2 (s), 139.7 (s), 141.1 (s), 160.2 (s),

171.2 (s) ppm. **IR** (ATR):  $\tilde{\nu}$  = 3852, 3391, 3019, 2948, 2669, 2323, 2101, 1946, 1701, 1596, 1548, 1491, 1368, 1292, 1195, 1122, 1005, 912, 836, 755, 695  $\text{cm}^{-1}$ . **MS** (**EI**<sup>+</sup>, **70 eV**)  $m/z$  (%): 423.2 (100)  $[\text{M}]^+ = [\text{C}_{26}\text{H}_{21}\text{N}_3\text{O}_3]^+$ , 377.1 (17)  $[\text{M}-\text{NO}_2]^+ = [\text{C}_{26}\text{H}_{21}\text{N}_2\text{O}]^+$ , 367.1 (26), 334.1 (7), 284.1 (6), 272.1 (14), 271.1 (57), 258.1 (15), 243.1 (20), 229.1 (14), 228.1 (24), 217.1 (9), 216.1 (16), 215.1 (48), 203.0 (15), 202.0 (34), 189.0 (7), 165.0 (7), 119.0 (12), 105.0 (41). **MS** (**CI**<sup>+</sup>, **methane**)  $m/z$  (%): 452.4 (17)  $[\text{M}+\text{C}_2\text{H}_5]^+ = [\text{C}_{28}\text{H}_{26}\text{N}_3\text{O}_3]^+$ , 424.3 (100)  $[\text{M}+\text{H}]^+ = [\text{C}_{26}\text{H}_{22}\text{N}_3\text{O}_3]^+$ . **EA**: calc. for  $\text{C}_{26}\text{H}_{21}\text{N}_3\text{O}_3$ : C 73.74%, H 5.00%, N 9.92%; found: C 74.04%, H 4.75%, N 10.16%.

**(2R,3R)-1-((Z)-benzyliden)-3'-ethyl-3-(nitromethyl)-1'-phenyl-1,3-dihydrospiro[indene-2,4'-pyrazole]-5'(1'H)-one (4b)**

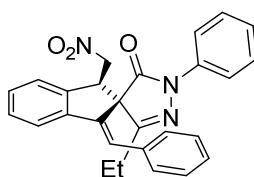

**4b** was obtained after flash chromatography ( $\text{SiO}_2$ , *n*-pentane/EtOAc 4:1) as off-white solid (109 mg, 83%, d.r. >20:1). **Molecular formula**:  $\text{C}_{27}\text{H}_{23}\text{N}_3\text{O}_3$ . **Molecular mass**: 437.50  $\text{g mol}^{-1}$ . **Mp**: 142–147 °C. **R<sub>f</sub>** (*n*-pentane/EtOAc 6:1) = 0.46. **HPLC**: AD, 6/4 *n*-heptane/*i*-PrOH, 1.0 mL/min,  $\lambda$  = 254 nm,  $\tau_{\text{Minor}}$  = 35.3 min,  $\tau_{\text{Major}}$  = 7.4 min. **OR**:  $[\alpha]_{\text{D}}^{20} = -159.6$  ( $c = 0.5$ ,  $\text{CHCl}_3$ , 93% *ee*). **<sup>1</sup>H NMR** (600 MHz,  $\text{CDCl}_3$ ):  $\delta$  = 1.11 (t,  $J = 7.3$  Hz, 3 H,  $\text{CH}_3$ ), 2.16–2.24 (m, 1 H,  $\text{CH}_2$ ), 2.25–2.33 (m, 1 H,  $\text{CH}_2$ ), 4.32 (dd,  $J = 5.5$  Hz,  $J = 8.6$  Hz, 1 H, CH), 4.66 (dd,  $J = 5.5$  Hz,  $J = 15.0$  Hz, 1 H,  $\text{CH}_2$ ), 5.00 (dd,  $J = 8.8$  Hz,  $J = 15.0$  Hz, 1 H,  $\text{CH}_2$ ), 6.98–7.04 (m, 2 H,  $\text{CH}_{\text{Ar}}$ ), 7.04–7.12 (m, 3 H,  $\text{CH}_{\text{Ar}}$ ), 7.14–7.20 (m, 1 H,  $\text{CH}_{\text{Ar}}$ ), 7.24–7.28 (m, 1 H,  $\text{CH}_{\text{Ar}}$ ), 7.31–7.40 (m, 4 H,  $\text{CH}_{\text{Ar}}$ ,  $\text{CH}_{\text{ol}}$ ), 7.40–7.48 (m, 1 H,  $\text{CH}_{\text{Ar}}$ ), 7.58 (t,  $J = 7.8$  Hz, 2 H,  $\text{CH}_{\text{Ar}}$ ), 7.67 (d,  $J = 7.7$  Hz, 1 H,  $\text{CH}_{\text{Ar}}$ ) ppm. **<sup>13</sup>C NMR** (151 MHz,  $\text{CDCl}_3$ ):  $\delta$  = 9.3 (q), 21.6 (t), 47.9 (d), 65.0 (s), 75.1 (t), 119.4 (d, 2 C), 121.2 (d), 124.5 (d), 125.4 (d), 126.7 (d), 128.0 (d), 128.1 (d, 2 C), 128.2 (d, 2 C), 128.7 (d, 2 C), 129.6 (d), 130.5 (d), 135.3 (s), 137.7 (s), 138.4 (s), 139.8 (s), 141.2 (s), 164.0 (s), 171.4 (s) ppm. **IR** (ATR):  $\tilde{\nu}$  = 3847, 3456, 2971, 2693, 2470, 2301, 2100, 1957, 1728, 1550, 1487, 1438, 1362, 1217, 1123, 1043, 913, 847, 754, 698  $\text{cm}^{-1}$ . **MS** (**EI**<sup>+</sup>, **70 eV**)  $m/z$  (%): 438.1 (22), 437.0 (81)  $[\text{M}]^+ = [\text{C}_{27}\text{H}_{23}\text{N}_3\text{O}_3]^+$ , 391.2 (17)  $[\text{M}-\text{NO}_2]^+ = [\text{C}_{27}\text{H}_{23}\text{N}_2\text{O}]^+$ , 390.1 (27), 299.1 (12), 298.1 (13), 285.1 (60), 273.1 (13), 272.1 (17), 271.0 (16), 270.0 (21), 258.0 (11), 257.0 (28), 256.0 (27), 245.0 (20), 244.0 (25), 243.0 (36), 242.0 (28), 241.0 (21), 240.0 (16), 239.0 (16), 231.0 (15), 230.0 (22), 229.0 (20), 228.0 (43), 227.0 (24), 226.0 (21), 217.0 (20), 216.0 (32), 215.0 (100), 213.0 (16), 204.0 (16), 203.0 (32), 202.0 (70), 201.0 (10), 195.0 (11), 189.0 (19), 180.0 (12), 178.0 (11), 166.0 (14), 165.0 (21), 152.0 (13), 128.0 (10), 127.0 (11), 119.0 (24), 115.0 (14), 105.0 (46), 92.1 (12), 91.1 (77), 77.1 (93), 65.1 (10), 64.1 (10), 51.2 (15). **MS** (**CI**<sup>+</sup>, **methane**)  $m/z$  (%): 466.1 (7)  $[\text{M}+\text{C}_2\text{H}_5]^+ = [\text{C}_{29}\text{H}_{28}\text{N}_3\text{O}_3]^+$ , 438.1 (100)  $[\text{M}+\text{H}]^+ = [\text{C}_{27}\text{H}_{24}\text{N}_3\text{O}_3]^+$ . **HR-MS** (**ESI**<sup>+</sup>): calc. for  $\text{C}_{27}\text{H}_{23}\text{NaN}_3\text{O}_3$ : 460.1632, found: 460.1632.

**(2*R*,3*R*)-1-((*Z*)-Benzyliden)-3'-isopropyl-3-(nitromethyl)-1'-phenyl-1,3-dihydrospiro[indene-2,4'-pyrazole]-5'(1'*H*)-one (4c)**

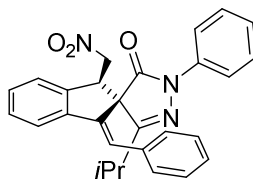

**4c** was obtained after flash chromatography (SiO<sub>2</sub>, *n*-pentane/EtOAc 4:1) as off-white solid (100 mg, 74%, d.r. >20:1). **Molecular formular:** C<sub>28</sub>H<sub>25</sub>N<sub>3</sub>O<sub>3</sub>. **Molecular mass:** 451.53 g mol<sup>-1</sup>. **Mp:** 140-144 °C. **R<sub>f</sub>**(*n*-pentane/EtOAc 6:1) = 0.47. **HPLC:** IA, 7/3 *n*-heptane/EtOH, 0.7 mL/min, λ = 254 nm, τ<sub>Minor</sub> = 28.0 min, τ<sub>Major</sub> = 14.7 min. **OR:** [α]<sub>D</sub><sup>20</sup> = -59.6 (*c* = 0.5, CHCl<sub>3</sub>, 92% *ee*). **<sup>1</sup>H NMR** (600 MHz, CDCl<sub>3</sub>): δ = 1.15 (d, *J* = 8.4 Hz, 3 H, CH<sub>3</sub>), 1.28 (d, *J* = 6.8 Hz, 3 H, CH<sub>3</sub>), 2.40-2.48 (m, 1 H, CH), 4.31 (dd, *J* = 5.6 Hz, *J* = 8.5 Hz, 1 H, CH), 4.55 (dd, *J* = 5.5 Hz, *J* = 15.1 Hz, 1 H, CH<sub>2</sub>), 5.05 (dd, *J* = 8.6 Hz, *J* = 15.1 Hz, 1 H, CH<sub>2</sub>), 7.00-7.04 (m, 2 H, CH<sub>Ar</sub>), 7.04-7.10 (m, 3 H, CH<sub>Ar</sub>), 7.15 (t, *J* = 7.4 Hz, 1 H, CH<sub>Ar</sub>), 7.25-7.29 (m, 1 H, CH<sub>Ar</sub>), 7.32 (t, *J* = 8.0 Hz, 2 H, CH<sub>Ar</sub>), 7.35 (s, 1 H, CH<sub>ol</sub>), 7.38 (t, *J* = 7.5 Hz, 1 H, CH<sub>Ar</sub>), 7.44 (t, *J* = 7.5 Hz, 1 H, CH<sub>Ar</sub>), 7.52 (d, *J* = 8.5 Hz, 2 H, CH<sub>Ar</sub>), 7.68 (d, *J* = 7.7 Hz, 1 H, CH<sub>Ar</sub>) ppm. **<sup>13</sup>C NMR** (151 MHz, CDCl<sub>3</sub>): δ = 21.0 (q), 22.1 (q), 28.9 (d), 48.1 (d), 64.6 (s), 75.4 (t), 119.5 (d, 2 C), 121.5 (d), 124.8 (d), 125.3 (d), 126.7 (d), 127.9 (d), 128.1 (d, 2 C), 128.3 (d, 2 C), 128.7 (d, 2 C), 129.7 (d), 130.0 (d), 135.6 (s), 137.7 (s), 138.1 (s), 139.9 (s), 141.8 (s), 167.3 (s), 170.7 (s) ppm. **IR** (ATR): ν̄ = 3846, 3453, 2931, 2666, 2309, 2095, 1705, 1554, 1487, 1362, 1218, 1084, 912, 867, 753, 693 cm<sup>-1</sup>. **MS (EI<sup>+</sup>, 70 eV) *m/z* (%)**: 451.1 (27) [M]<sup>+</sup> = [C<sub>28</sub>H<sub>25</sub>N<sub>3</sub>O<sub>3</sub>]<sup>+</sup>, 405.2 (15) [M-NO<sub>2</sub>]<sup>+</sup> = [C<sub>28</sub>H<sub>25</sub>N<sub>2</sub>O]<sup>+</sup>, 313.1 (13), 299.1 (16), 271.1 (17), 270.1 (13), 245.0 (18), 244.0 (22), 243.0 (25), 242.0 (32), 241.0 (22), 240.0 (22), 239.0 (19), 231.1 (14), 230.0 (24), 229.0 (19), 228.0 (39), 227.0 (26), 226.0 (20), 217.1 (18), 216.0 (29), 215.0 (100), 213.0 (15), 203.0 (27), 202.0 (70), 201.0 (13), 189.0 (16), 180.0 (12), 178.0 (15), 166.0 (14), 165.0 (21), 128.0 (11), 127.0 (12), 119.0 (20), 115.0 (15), 105.0 (33), 92.1 (15), 91.1 (89), 78.1 (11), 77.1 (99), 65.1 (14), 64.1 (13), 51.1 (15). **MS (CI<sup>+</sup>, methane) *m/z* (%)**: 480.21 (7) [M+C<sub>2</sub>H<sub>5</sub>]<sup>+</sup> = [C<sub>30</sub>H<sub>30</sub>N<sub>3</sub>O<sub>3</sub>]<sup>+</sup>, 452.0 (100) [M+H]<sup>+</sup> = [C<sub>28</sub>H<sub>26</sub>N<sub>3</sub>O<sub>3</sub>]<sup>+</sup>. **HR-MS (ESI<sup>+</sup>):** calc. for C<sub>28</sub>H<sub>26</sub>N<sub>3</sub>O<sub>3</sub>: 452.1969, found: 459.1953.

**(2*R*,3*R*)-1-((*Z*)-Benzyliden)-3-(nitromethyl)-1',3'-diphenyl-1,3-dihydrospiro[indene-2,4'-pyrazole]-5'(1'*H*)-one (4d)**

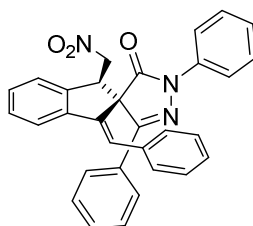

**4d** was obtained after flash chromatography (SiO<sub>2</sub>, *n*-pentane/EtOAc 4:1) as off-white solid (139 mg, 95%, d.r. 6:1). **Molecular formular:** C<sub>31</sub>H<sub>23</sub>N<sub>3</sub>O<sub>3</sub>. **Molecular mass:** 485.54 g mol<sup>-1</sup>. **Mp:** 75-79 °C.

$R_f$  (*n*-pentane/EtOAc 6:1) = 0.39. **HPLC**: AD, 6/4 *n*-heptane/*i*-PrOH, 1.0 mL/min,  $\lambda$  = 230 nm,  $\tau_{Minor}$  = 46.6 min,  $\tau_{Major}$  = 16.6 min. **OR**:  $[\alpha]_D^{20} = -109.7$  ( $c = 0.5$ , CHCl<sub>3</sub>, 91% *ee*). **<sup>1</sup>H NMR** (600 MHz, CDCl<sub>3</sub>, major diastereomer):  $\delta$  = 4.62 (dd,  $J = 4.9$  Hz,  $J = 9.2$  Hz, 1 H, CH), 4.81 (dd,  $J = 4.9$  Hz,  $J = 14.9$  Hz, 1 H, CH<sub>2</sub>), 5.08 (dd,  $J = 9.3$  Hz,  $J = 14.9$  Hz, 1 H, CH<sub>2</sub>), 6.82 (d,  $J = 7.4$  Hz, 2 H, CH<sub>Ar</sub>), 6.92 (t,  $J = 7.7$  Hz, 2 H, CH<sub>Ar</sub>), 7.03 (t,  $J = 7.4$  Hz, 1 H, CH<sub>Ar</sub>), 7.19-7.26 (m, 2 H, CH<sub>Ar</sub>), 7.26-7.33 (m, 2 H, CH<sub>Ar</sub>), 7.33-7.45 (m, 5 H, CH<sub>Ar</sub>, CH<sub>ol</sub>), 7.47-7.53 (m, 1 H, CH<sub>Ar</sub>), 7.58 (d,  $J = 7.9$  Hz, 2 H, CH<sub>Ar</sub>), 7.64 (d,  $J = 7.9$  Hz, 2 H, CH<sub>Ar</sub>), 7.77 (d,  $J = 7.7$  Hz, 1 H, CH<sub>Ar</sub>) ppm. **<sup>13</sup>C NMR** (151 MHz, CDCl<sub>3</sub>):  $\delta$  = 48.2 (d), 63.5 (s), 74.5 (t), 119.6 (d, 2 C), 121.6 (d), 124.4 (d), 125.6 (d, 2 C), 126.3 (d, 2 C), 127.7 (d, 2 C), 128.1 (d, 2 C), 128.6 (d, 2 C), 128.7 (d, 3 C), 129.4 (d), 129.7 (s), 130.0 (d), 130.5 (d), 134.8 (s), 137.3 (s), 139.8 (s), 140.7 (s), 141.0 (s), 158.5 (s), 172.2 (s) ppm. **IR** (ATR):  $\tilde{\nu}$  = 3882, 3396, 3043, 2924, 2654, 2311, 2095, 1890, 1700, 1550, 1491, 1374, 1305, 1132, 1011, 912, 848, 752, 689 cm<sup>-1</sup>. **MS (EI<sup>+</sup>, 70 eV)**  $m/z$  (%): 485.1 (1) [M]<sup>+</sup> = [C<sub>31</sub>H<sub>23</sub>N<sub>3</sub>O<sub>3</sub>]<sup>+</sup>, 289.0 (11), 228.0 (16), 227.0 (10), 227.0 (12), 216.0 (13), 215.0 (46), 202.0 (31), 119.0 (24), 105.1 (11), 91.1 (40), 78.2 (11), 77.1 (100), 51.3 (20). **HR-MS (ESI<sup>+</sup>)**: calc. for C<sub>31</sub>H<sub>24</sub>N<sub>3</sub>O<sub>3</sub>: 486.1812, found: 486.1809.

**(2R,3R)-1-((Z)-Benzyliden)-1'-(2-chlorophenyl)-3'-methyl-3-(nitromethyl)-1,3-dihydrospiro-[indene-2,4'-pyrazole]-5'(1'H)-one (4e)**

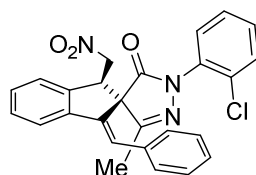

**4e** was obtained after flash chromatography (SiO<sub>2</sub>, *n*-pentane/EtOAc 4:1) as off-white solid (100 mg, 73%, d.r. 10:1). **Molecular formula**: C<sub>26</sub>H<sub>20</sub>ClN<sub>3</sub>O<sub>3</sub>. **Molecular mass**: 457.91 g mol<sup>-1</sup>. **Mp**: 148-152 °C.  $R_f$  (*n*-pentane/EtOAc 6:1) = 0.27. **HPLC**: IC, 7/3 *n*-heptane/EtOH, 0.7 mL/min,  $\lambda$  = 214 nm,  $\tau_{Minor}$  = 36.0 min,  $\tau_{Major}$  = 19.3 min. **OR**:  $[\alpha]_D^{20} = -201.7$  ( $c = 0.5$ , CHCl<sub>3</sub>, 82% *ee*). **<sup>1</sup>H NMR** (600 MHz, CDCl<sub>3</sub>, major diastereomer):  $\delta$  = 1.93 (s, 3 H, CH<sub>3</sub>), 4.37 (dd,  $J = 6.7$  Hz,  $J = 7.7$  Hz, 1 H, CH), 4.71 (dd,  $J = 7.7$  Hz,  $J = 14.5$  Hz, 1 H, CH<sub>2</sub>), 4.94 (dd,  $J = 6.4$  Hz,  $J = 14.5$  Hz, 1 H, CH<sub>2</sub>), 6.87-6.94 (m, 1 H, CH<sub>Ar</sub>), 7.13-7.18 (m, 2 H, CH<sub>Ar</sub>), 7.22 (d,  $J = 7.5$  Hz, 1 H, CH<sub>Ar</sub>), 7.24-7.28 (m, 2 H, CH<sub>Ar</sub>), 7.28-7.33 (m, 4 H, CH<sub>Ar</sub>), 7.36 (t,  $J = 7.4$  Hz, 1 H, CH<sub>Ar</sub>), 7.40 (s, 1 H, CH<sub>ol</sub>), 7.41-7.47 (m, 2 H, CH<sub>Ar</sub>) ppm. **<sup>13</sup>C NMR** (151 MHz, CDCl<sub>3</sub>):  $\delta$  = 14.3 (q), 47.9 (d), 64.3 (s), 76.1 (t), 121.6 (d), 124.5 (d), 126.2 (d), 127.3 (d), 127.8 (d), 128.3 (d), 128.4 (d, 2 C), 128.7 (d, 2 C), 129.5 (d), 129.6 (d), 130.1 (d), 130.5 (s), 130.7 (d), 134.0 (s), 135.7 (s), 137.2 (s), 140.0 (s), 141.0 (s), 160.8 (s), 171.1 (s) ppm. **IR** (ATR):  $\tilde{\nu}$  = 3880, 3431, 3006, 2650, 2313, 2087, 1902, 1717, 1552, 1479, 1365, 1289, 1193, 1096, 947, 846, 754, 697, 572 cm<sup>-1</sup>. **MS (EI<sup>+</sup>, 70 eV)**  $m/z$  (%): 459.2 (29) [M, <sup>37</sup>Cl]<sup>+</sup> = [C<sub>26</sub>H<sub>20</sub>ClN<sub>3</sub>O<sub>3</sub>]<sup>+</sup>, 457.2 (100) [M, <sup>35</sup>Cl]<sup>+</sup> = [C<sub>26</sub>H<sub>20</sub>ClN<sub>3</sub>O<sub>3</sub>]<sup>+</sup>, 412.2 (12), 411.2 (14), 410.2 (27) [M-HNO<sub>2</sub>, <sup>35</sup>Cl]<sup>+</sup> = [C<sub>26</sub>H<sub>19</sub>ClO]<sup>+</sup>, 375.2 (8), 215.1 (8), 202.1 (6), 111.0 (5). **MS (CI<sup>+</sup>, methane)**  $m/z$  (%): 468.1 (30) [M+C<sub>2</sub>H<sub>5</sub>, <sup>35</sup>Cl]<sup>+</sup> =

$[C_{28}H_{25}ClN_3O_3]^+$ , 458.3 (100)  $[M+H, ^{35}Cl]^+ = [C_{26}H_{21}ClN_3O_3]^+$ . **HR-MS (ESI<sup>+</sup>)**: calc. for  $C_{26}H_{20}ClNaN_3O_3$ : 480.1084, found: 480.1085.

**(2R,3R)-1-((Z)-Benzyliden)-3'-methyl-3-(nitromethyl)-1'-(p-tolyl)-1,3-dihydrospiro[indene-2,4'-pyrazole]-5'(1'H) on (4f)**

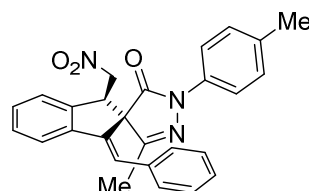

**4f** wurde nach säulenchromatographischer Aufarbeitung (SiO<sub>2</sub>, *n*-pentane/EtOAc 4:1) as off-white solid (105 mg, 89%, d.r. 10:1). **Molecular formular**: C<sub>27</sub>H<sub>23</sub>N<sub>3</sub>O<sub>3</sub>. **Molecular mass**: 437.50 g mol<sup>-1</sup>. **R<sub>f</sub>** (*n*-pentane/EtOAc 6:1) = 0.36. **Mp**: 148-152 °C. **HPLC**: IC, 7/3 *n*-heptane/EtOH, 1.0 mL/min, λ = 214 nm, τ<sub>Minor</sub> = 36.3 min, τ<sub>Major</sub> = 25.6 min. **OR**:  $[\alpha]_D^{20} = -179.2$  (*c* = 0.5, CHCl<sub>3</sub>, 99% *ee*). **<sup>1</sup>H NMR** (600 MHz, CDCl<sub>3</sub>, major diastereomer): δ = 1.93 (s, 3 H, CH<sub>3</sub>), 2.34 (s, 3 H, CH<sub>3</sub>), 4.30 (dd, *J* = 5.4 Hz, *J* = 8.6 Hz, 1 H, CH), 4.65 (dd, *J* = 5.4 Hz, *J* = 15.0 Hz, 1 H, CH<sub>2</sub>), 5.00 (dd, *J* = 8.7 Hz, *J* = 15.0 Hz, 1 H, CH<sub>2</sub>), 7.01-7.05 (m, 2 H, CH<sub>Ar</sub>), 7.07-7.15 (m, 5 H, CH<sub>Ar</sub>), 7.26 (s, 1 H, CH<sub>ol</sub>), 7.35-7.40 (m, 4 H, CH<sub>Ar</sub>), 7.43 (d, *J* = 7.5 Hz, 1 H, CH<sub>Ar</sub>), 7.67 (d, *J* = 7.7 Hz, 1 H, CH<sub>Ar</sub>) ppm. **<sup>13</sup>C NMR** (151 MHz, CDCl<sub>3</sub>): δ = 13.9 (q), 21.0 (q), 47.4 (d), 64.7 (s), 74.9 (t), 119.3 (d, 2 C), 121.4 (d), 124.4 (d), 126.1 (d), 127.9 (d), 128.0 (d, 2 C), 128.2 (d, 2 C), 129.1 (d, 2 C), 129.4 (d), 129.8 (d), 134.9 (s), 135.0 (s), 135.1 (s), 138.0 (s), 139.6 (s), 141.0 (s), 159.9 (s), 170.8 (s) ppm. **IR** (ATR):  $\tilde{\nu} = 3021, 2921, 2644, 2310, 2060, 1893, 1705, 1613, 1552, 1511, 1366, 1288, 1202, 1119, 1024, 932, 820, 757, 698, 622, 561$  cm<sup>-1</sup>. **MS (EI<sup>+</sup>, 70 eV)** *m/z* (%): 437.3 (100)  $[M]^+ = [C_{27}H_{23}N_3O_3]^+$ , 391.2 (5), 390.2 (6)  $[M-HNO_2]^+ = [C_{27}H_{22}N_2O]$ . **MS (CI<sup>+</sup>, methane)** *m/z* (%): 466.1 (11)  $[M+C_2H_5]^+ = [C_{29}H_{28}N_3O_3]^+$ , 438.0 (100)  $[M+H]^+ = [C_{27}H_{24}N_3O_3]^+$ . **HR-MS (ESI<sup>+</sup>)**: calc. for C<sub>27</sub>H<sub>24</sub>N<sub>3</sub>O<sub>3</sub>: 438.1813, found: 438.1812.

**(2R,3R)-1-((Z)-benzyliden)-1',3'-dimethyl-3-(nitromethyl)-1,3-dihydrospiro[indene-2,4'-pyrazole]-5'(1'H)-one (4g)**

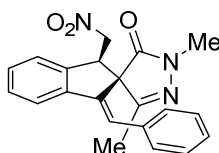

**4g** was obtained after flash chromatography (SiO<sub>2</sub>, *n*-pentane/EtOAc 3:1) as off-white solid (64 mg, 59%, d.r. 20:3:1). **Molecular formular**: C<sub>21</sub>H<sub>19</sub>N<sub>3</sub>O<sub>3</sub>. **Molecular mass**: 361.40 g mol<sup>-1</sup>. **R<sub>f</sub>** (*n*-pentane/EtOAc 6:1) = 0.15. **Mp**: 142-145 °C. **HPLC**: AD, 7/3 *n*-heptane/*i*-PrOH, 0.5 mL/min, λ = 214 nm, τ<sub>Minor</sub> = 24.0 min, τ<sub>Major</sub> = 20.5 min. **OR**:  $[\alpha]_D^{20} = -120.5$  (*c* = 0.5, CHCl<sub>3</sub>, 86% *ee*). **<sup>1</sup>H NMR** (600 MHz, CDCl<sub>3</sub>, major diastereomer): δ = 1.85 (s, 3 H, CH<sub>3</sub>), 2.93 (s, 3 H, CH<sub>3</sub>), 4.17 (dd, *J* =

5.2 Hz,  $J = 9.0$  Hz, 1 H, CH), 4.59 (dd,  $J = 5.2$  Hz,  $J = 15.0$  Hz, 1 H, CH<sub>2</sub>), 5.00 (dd,  $J = 9.0$  Hz,  $J = 15.0$  Hz, 1 H, CH<sub>2</sub>), 7.02 (dd,  $J = 0.8$  Hz,  $J = 7.2$ , 2 H, CH<sub>Ar</sub>), 7.23 (d,  $J = 7.7$  Hz, 1 H, CH<sub>Ar</sub>), 7.26-7.30 (m, 4 H, CH<sub>Ar</sub>), 7.41 (d,  $J = 7.5$  Hz, 1 H, CH<sub>ol</sub>), 7.36 (dd,  $J = 3.8$  Hz,  $J = 11.1$  Hz, 1 H, CH<sub>Ar</sub>), 7.41 (d,  $J = 7.5$  Hz, 1 H, CH<sub>Ar</sub>) ppm. <sup>13</sup>C NMR (151 MHz, CDCl<sub>3</sub>):  $\delta = 13.8$  (q), 31.0 (q), 46.9 (d), 63.1 (s), 75.1 (t), 121.5 (d), 124.6 (d), 126.0 (d), 128.0 (d, 2 C), 128.1 (d), 128.4 (d, 2 C), 129.5 (d), 129.9 (d), 135.3 (s), 138.3 (s), 139.9 (s), 141.6 (s), 159.5 (s), 172.7 (s) ppm. IR (ATR):  $\tilde{\nu} = 3371, 3066, 2913, 2322, 2202, 1927, 1690, 1601, 1548, 1461, 1409, 1375, 1289, 1223, 1183, 1158, 1113, 1032, 994, 951, 919, 865, 761, 727, 698, 670$  cm<sup>-1</sup>. MS (EI<sup>+</sup>, 70 eV)  $m/z$  (%): 362.0 (34), 361.0 (100) [M]<sup>+</sup> = [C<sub>21</sub>H<sub>19</sub>N<sub>3</sub>O<sub>3</sub>]<sup>+</sup>, 315.0 (33), 314.0 (64) [M-NO<sub>2</sub>]<sup>+</sup> = [C<sub>21</sub>H<sub>19</sub>N<sub>2</sub>O], 313.0 (10), 284.9 (12), 272.0 (17), 270.9 (18), 227.9 (13), 215.0 (21), 209. (12), 202.0 (14). MS (CI<sup>+</sup>, methane)  $m/z$  (%): 390.1 (7) [M+C<sub>2</sub>H<sub>5</sub>]<sup>+</sup> = [C<sub>23</sub>H<sub>24</sub>N<sub>3</sub>O<sub>3</sub>]<sup>+</sup>, 362.0 (100) [M+H]<sup>+</sup> = [C<sub>21</sub>H<sub>20</sub>N<sub>3</sub>O<sub>3</sub>]<sup>+</sup>. HR-MS (ESI<sup>+</sup>): calc. for [M+H]<sup>+</sup> = [C<sub>21</sub>H<sub>19</sub>NaN<sub>3</sub>O<sub>3</sub>]<sup>+</sup>: 384.1319, found: 384.1323.

## 10.0 NMR Spectra

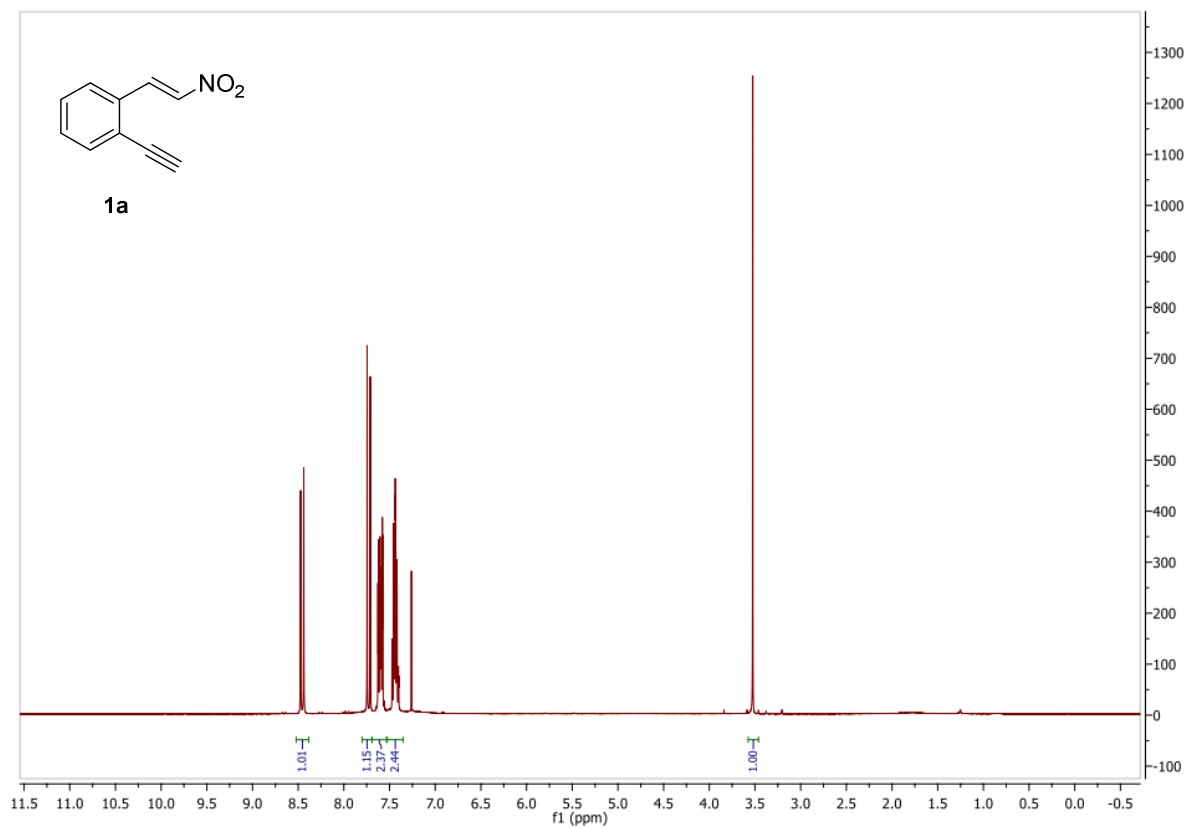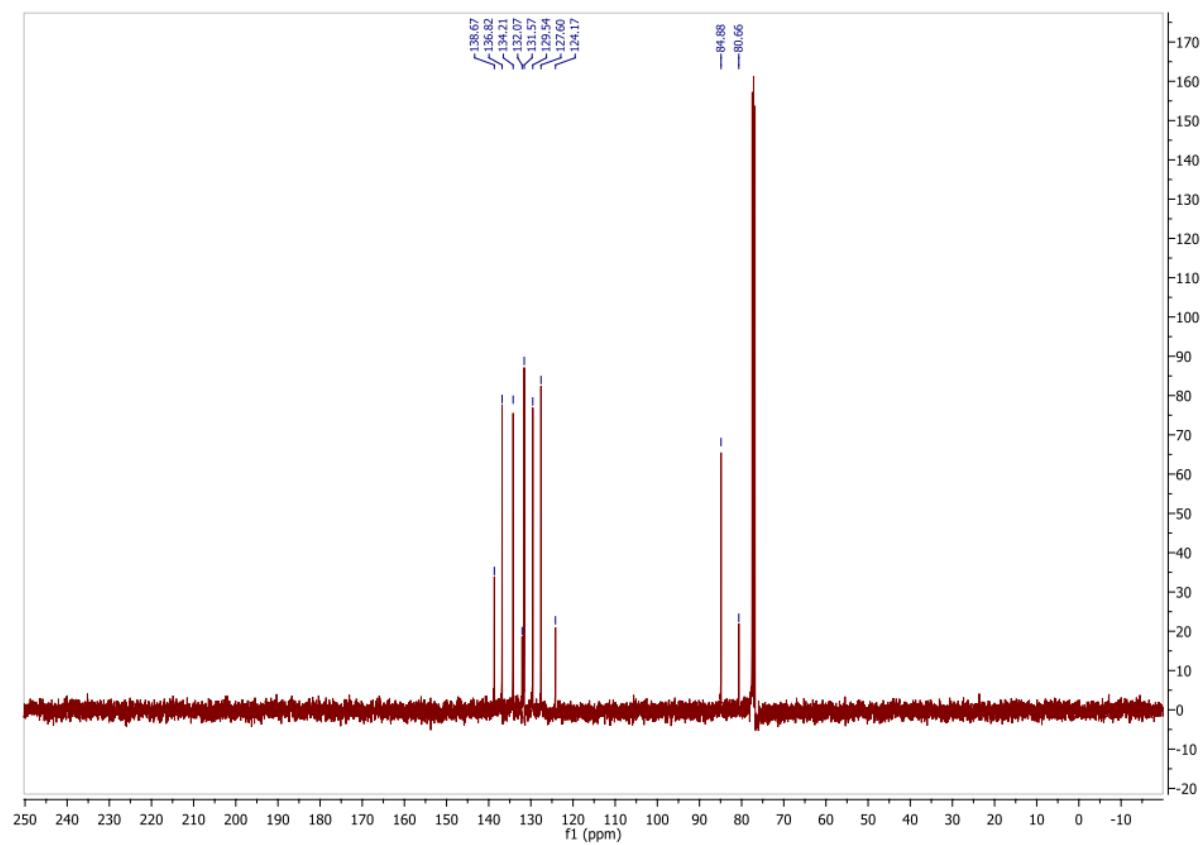



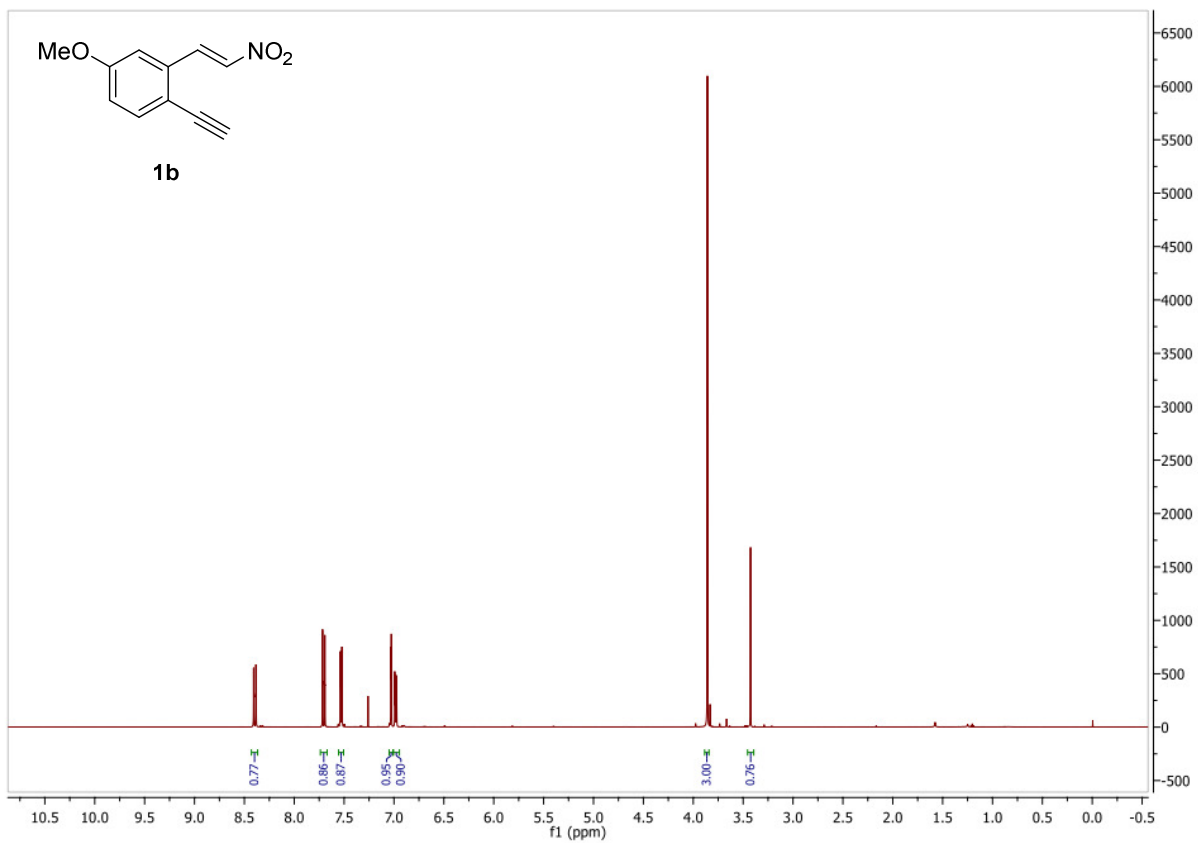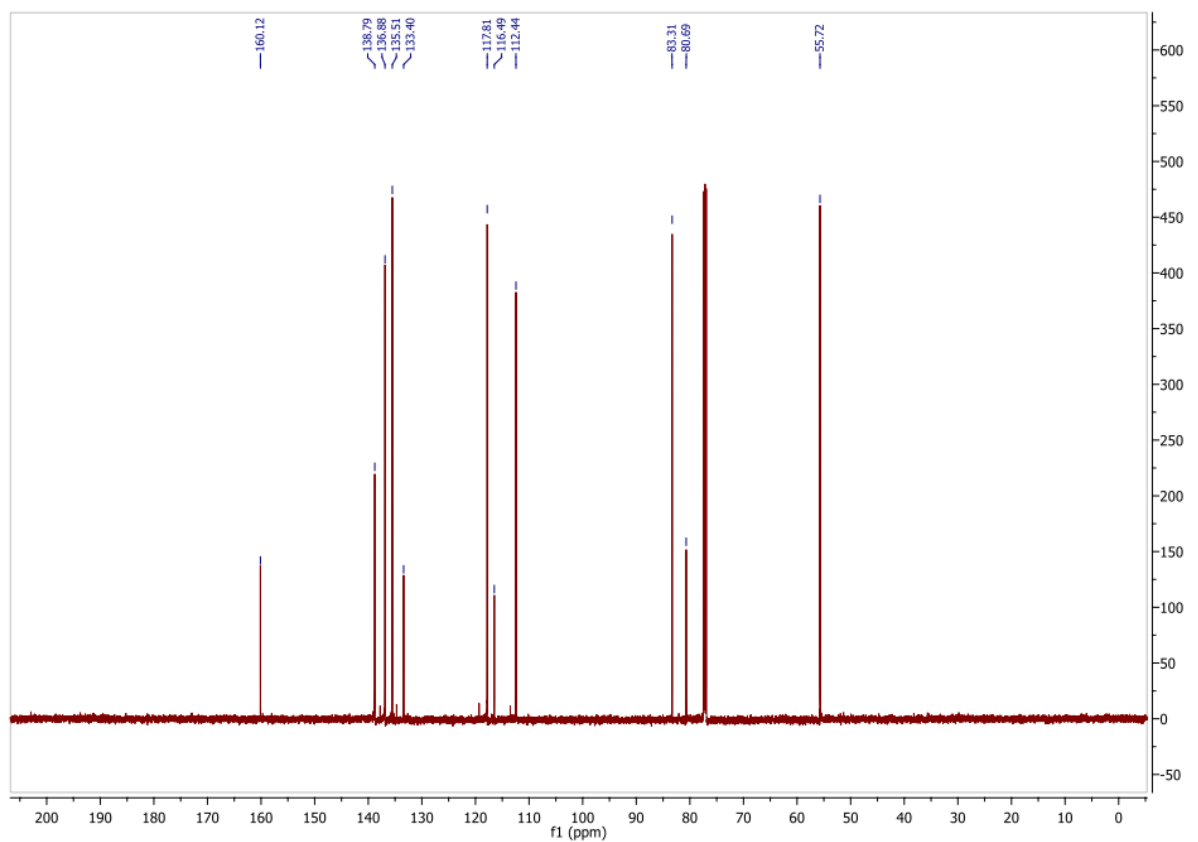

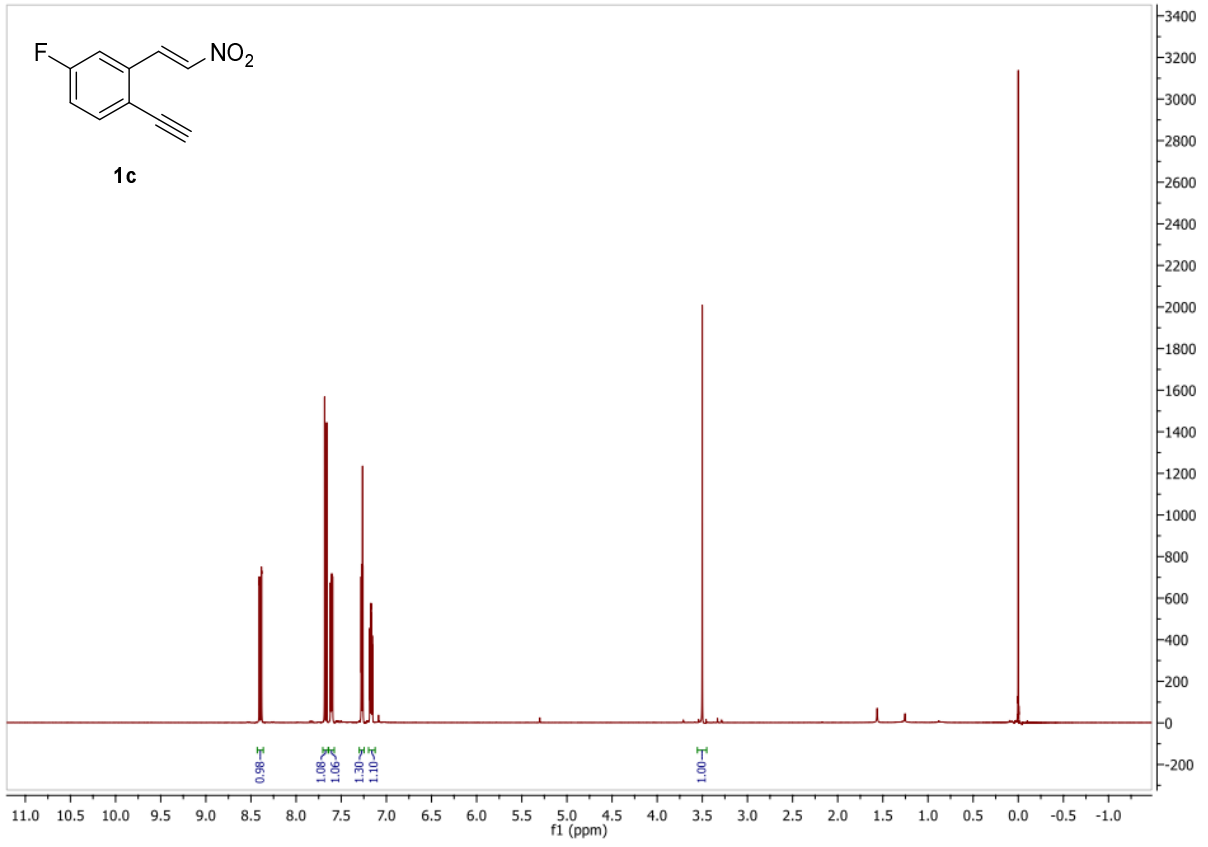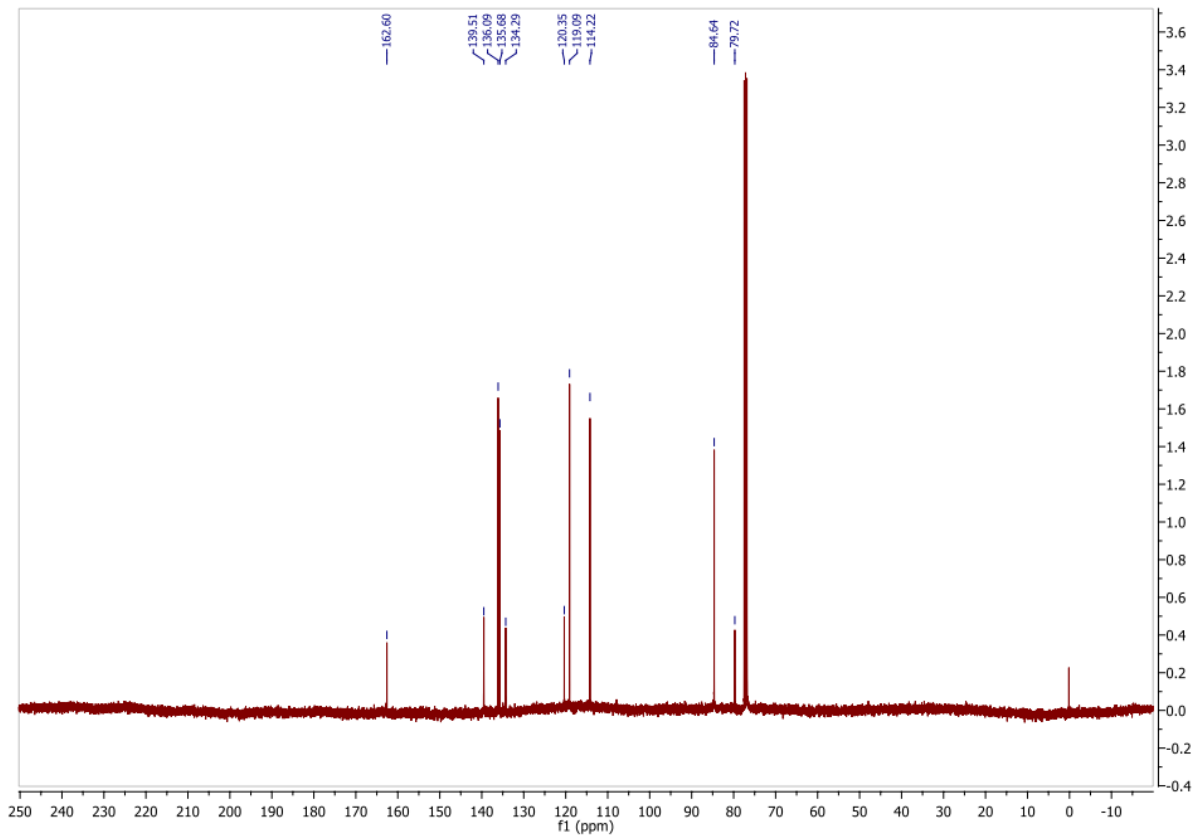

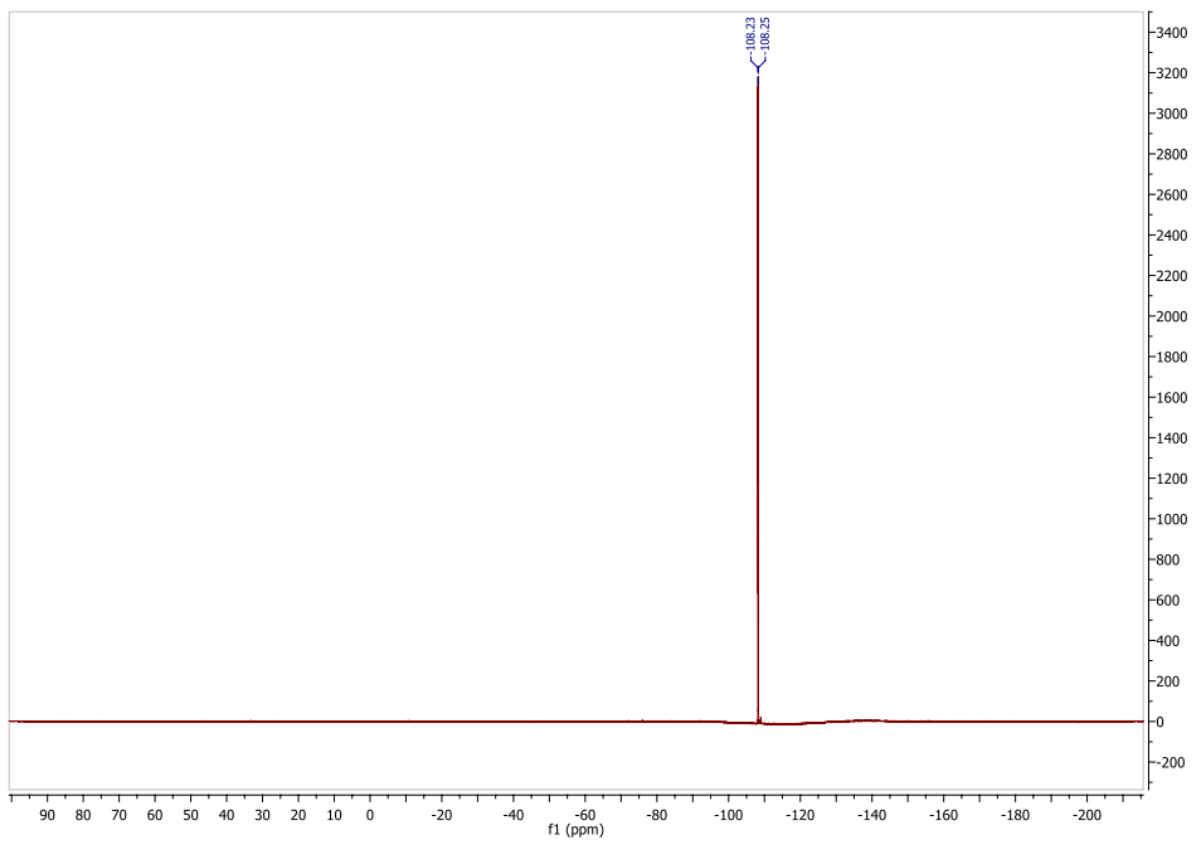

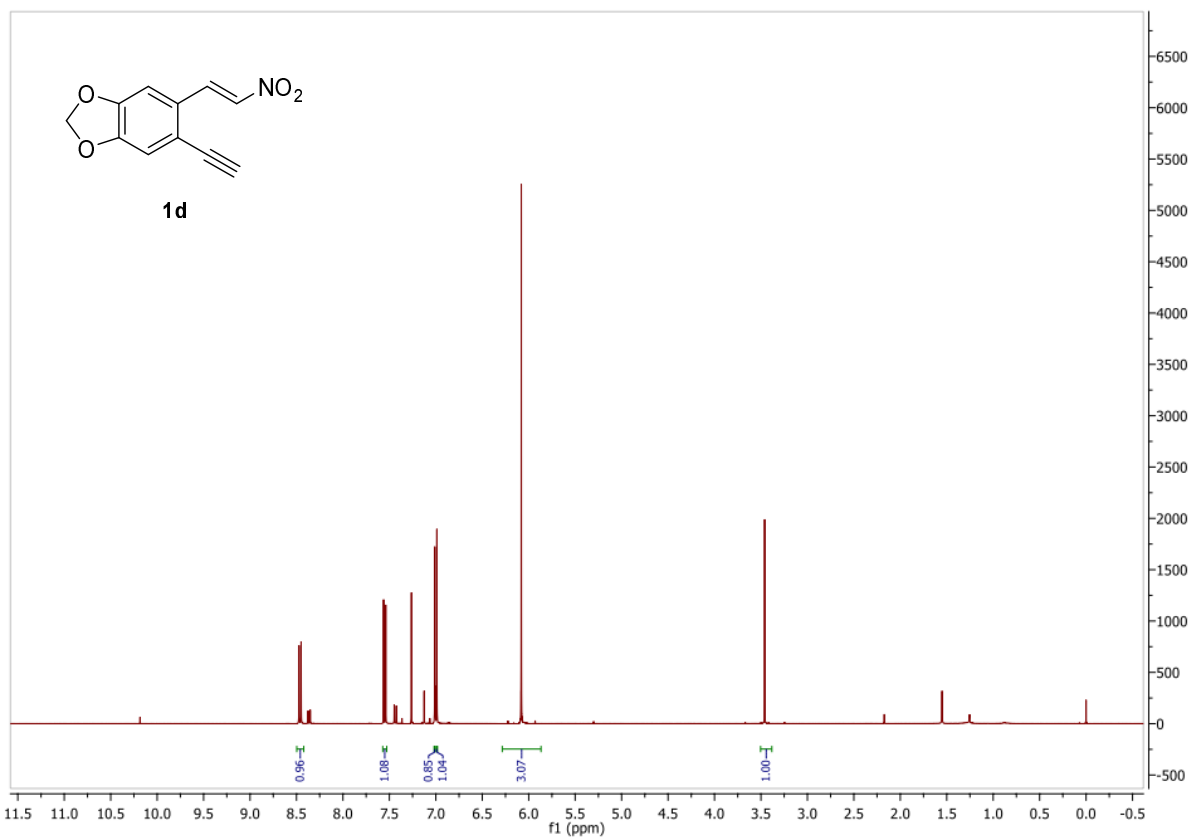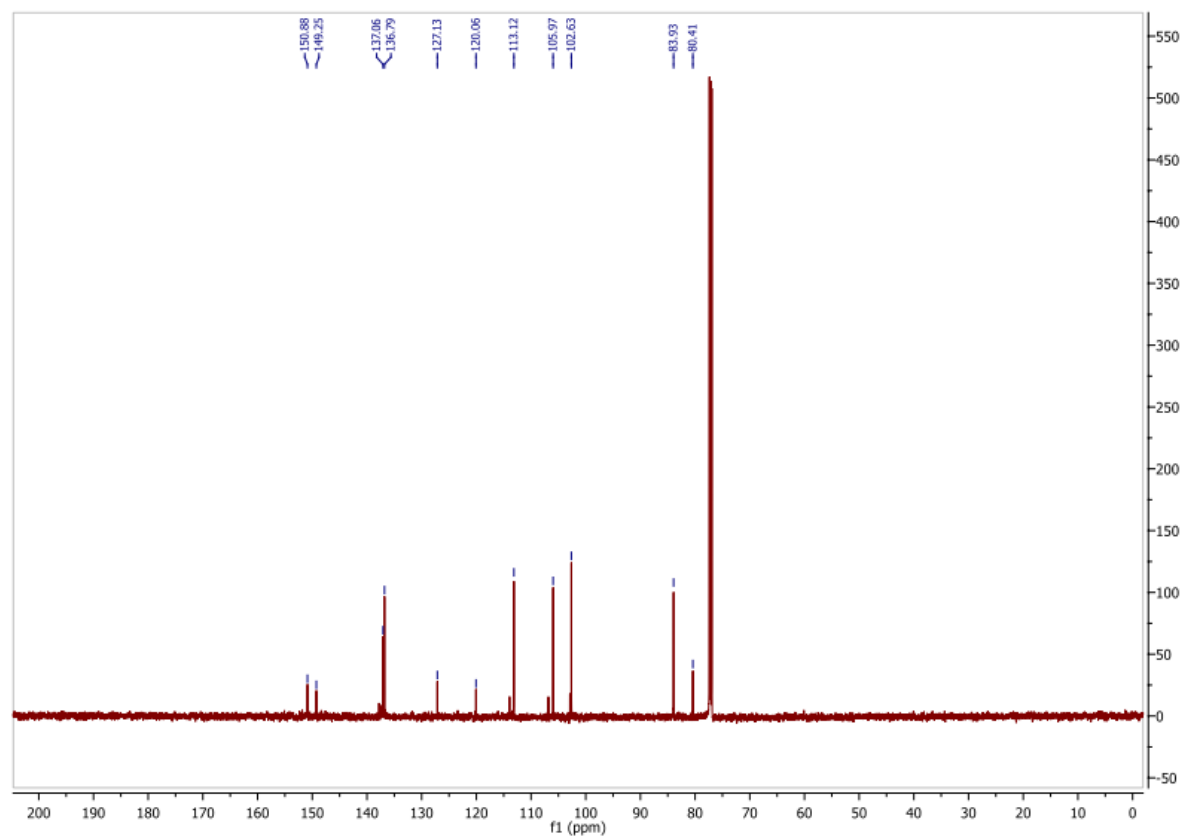

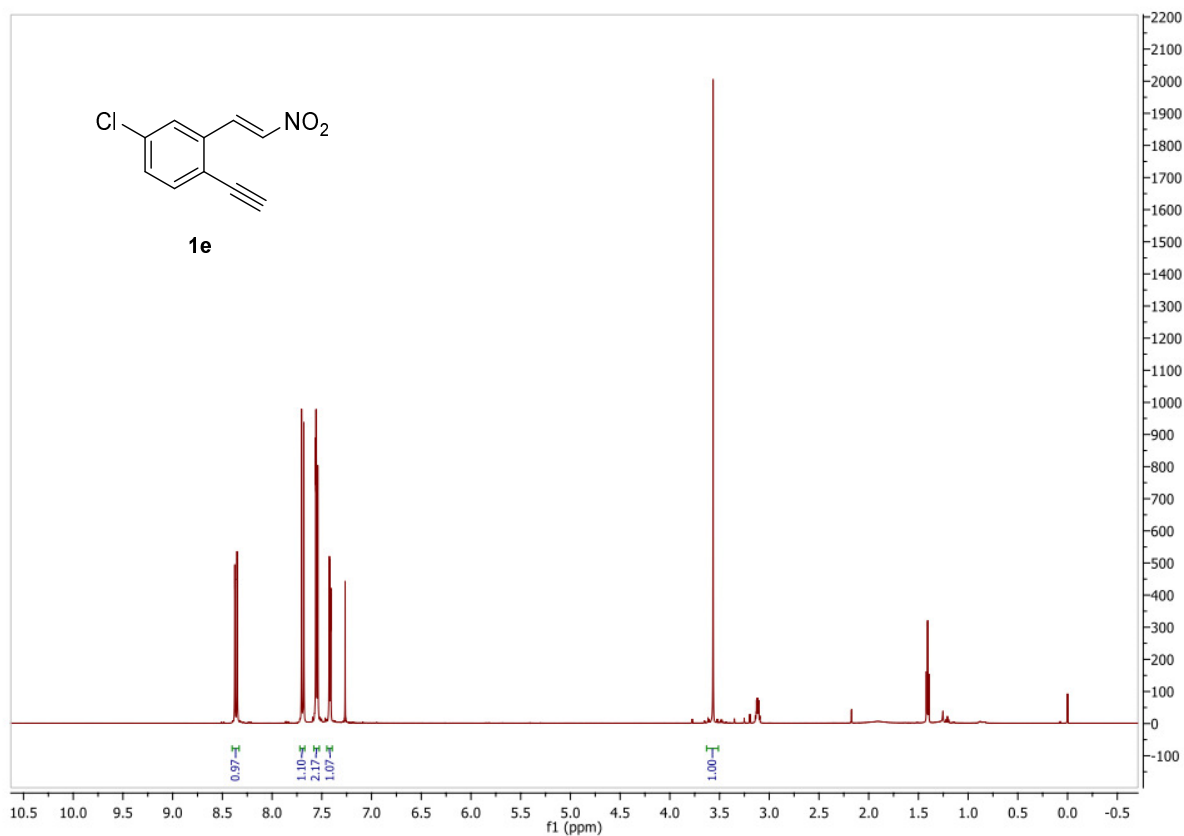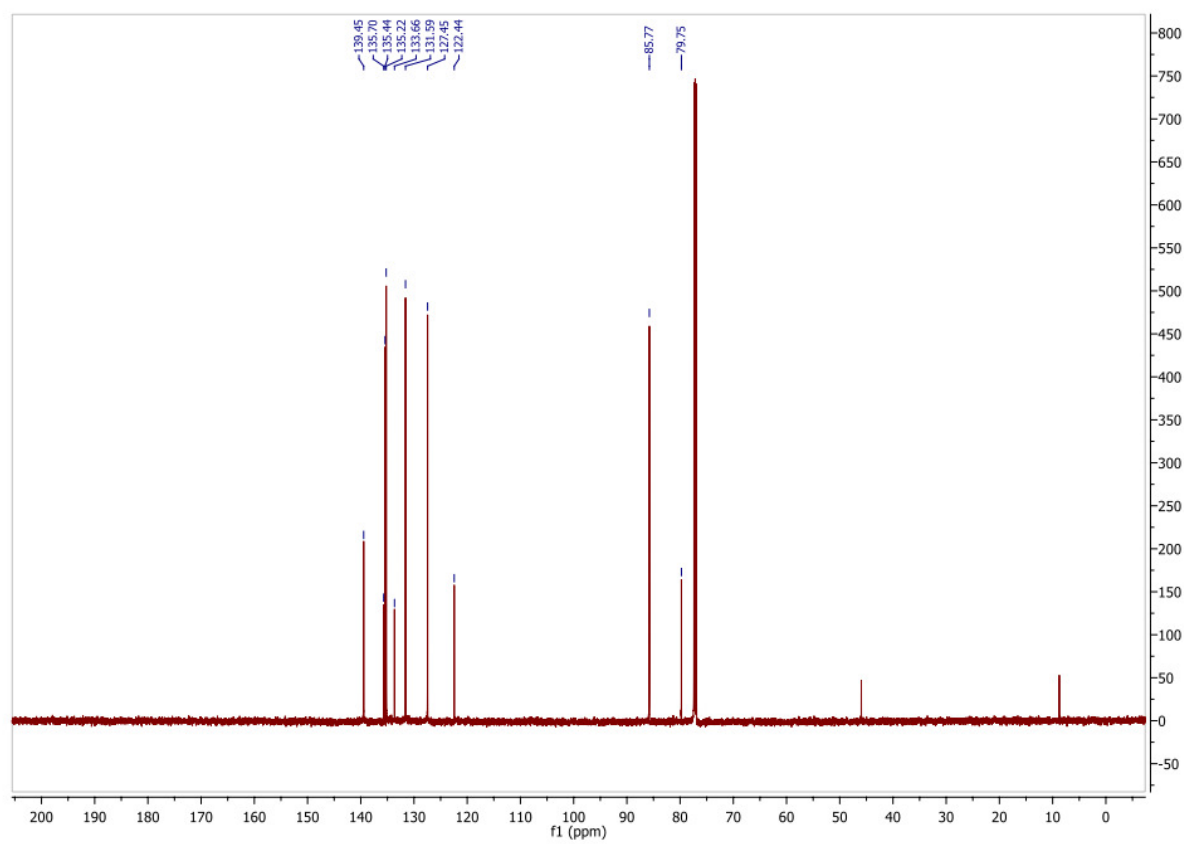

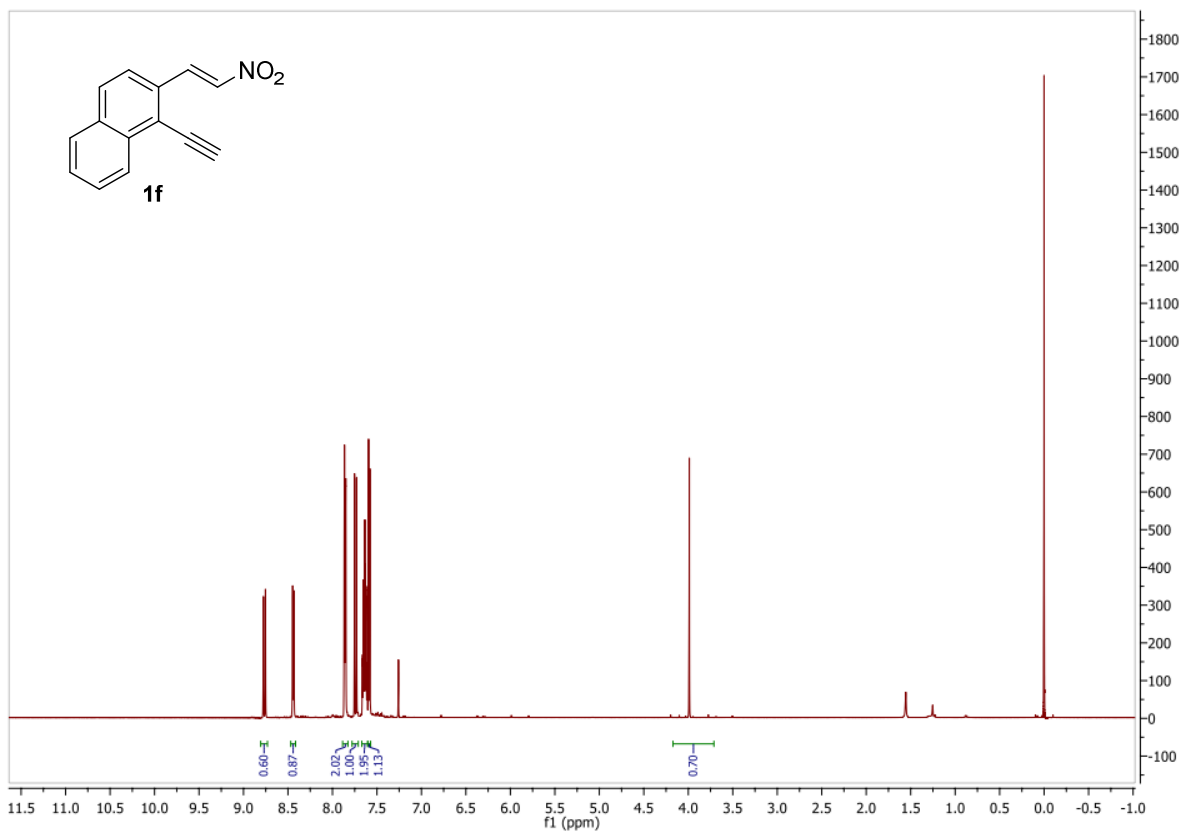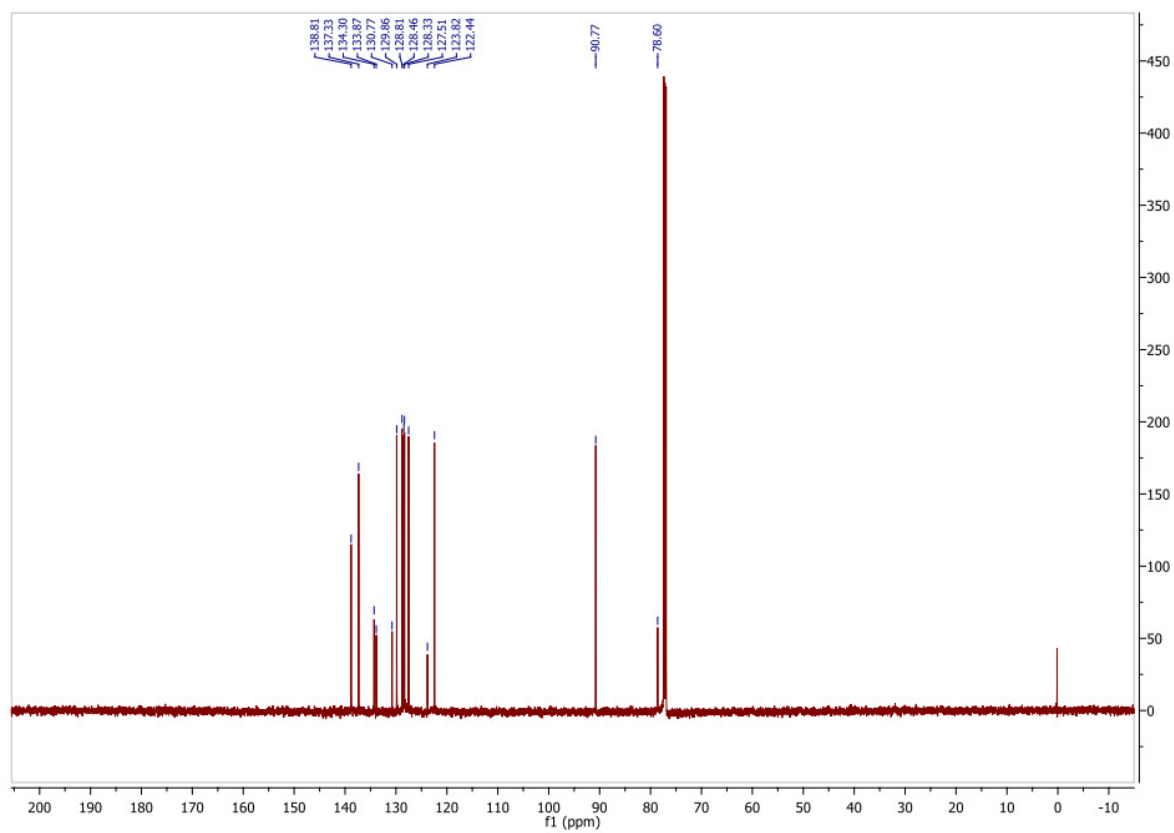

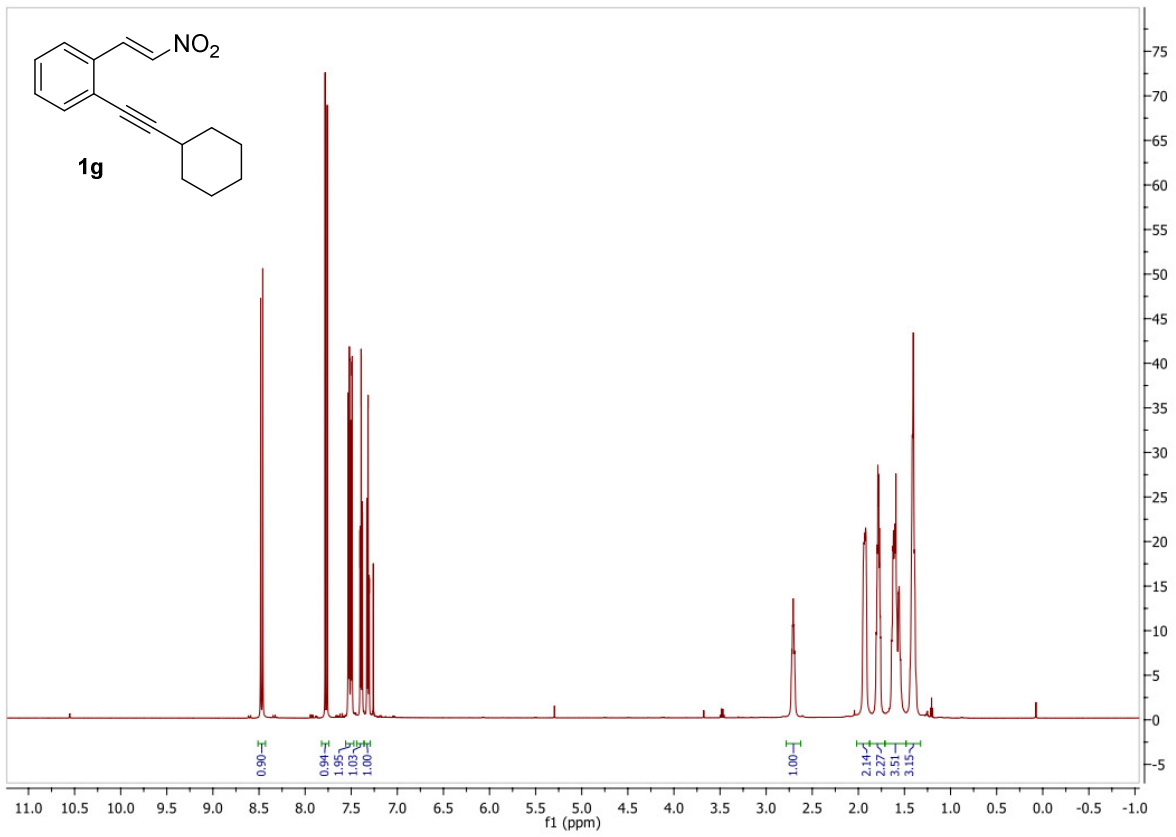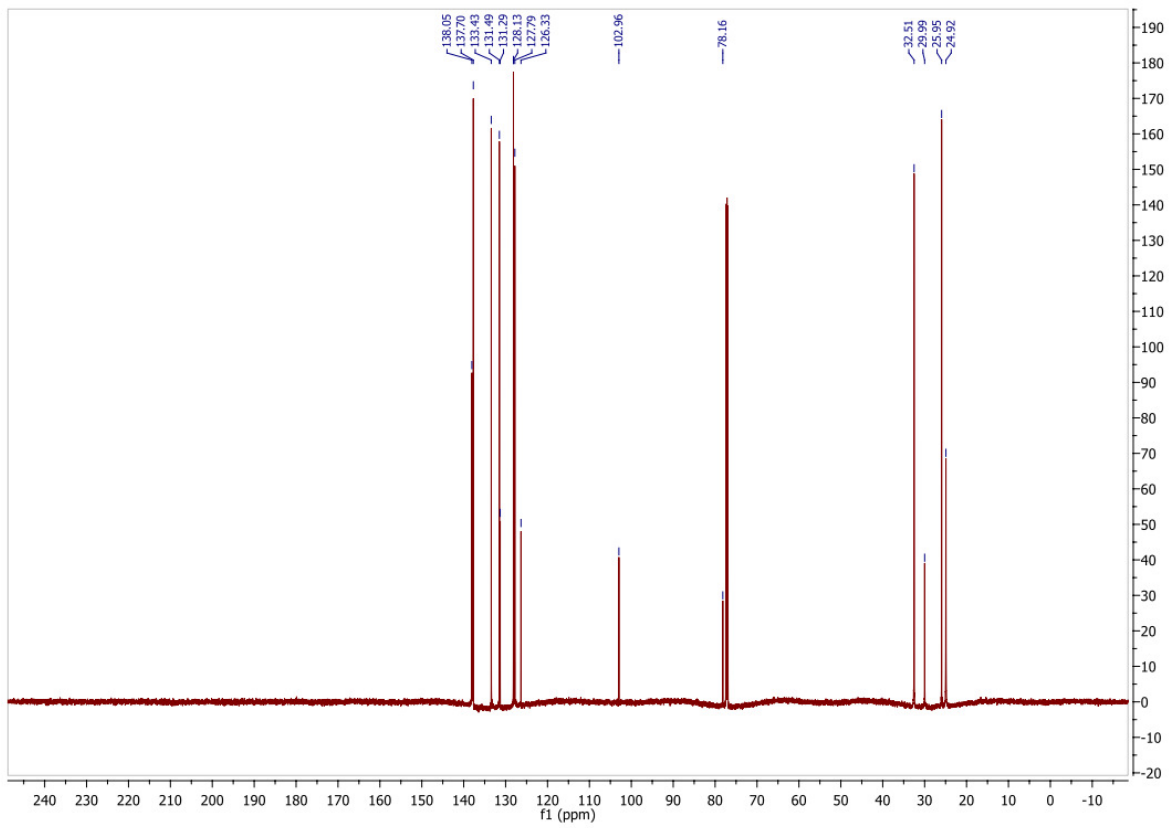

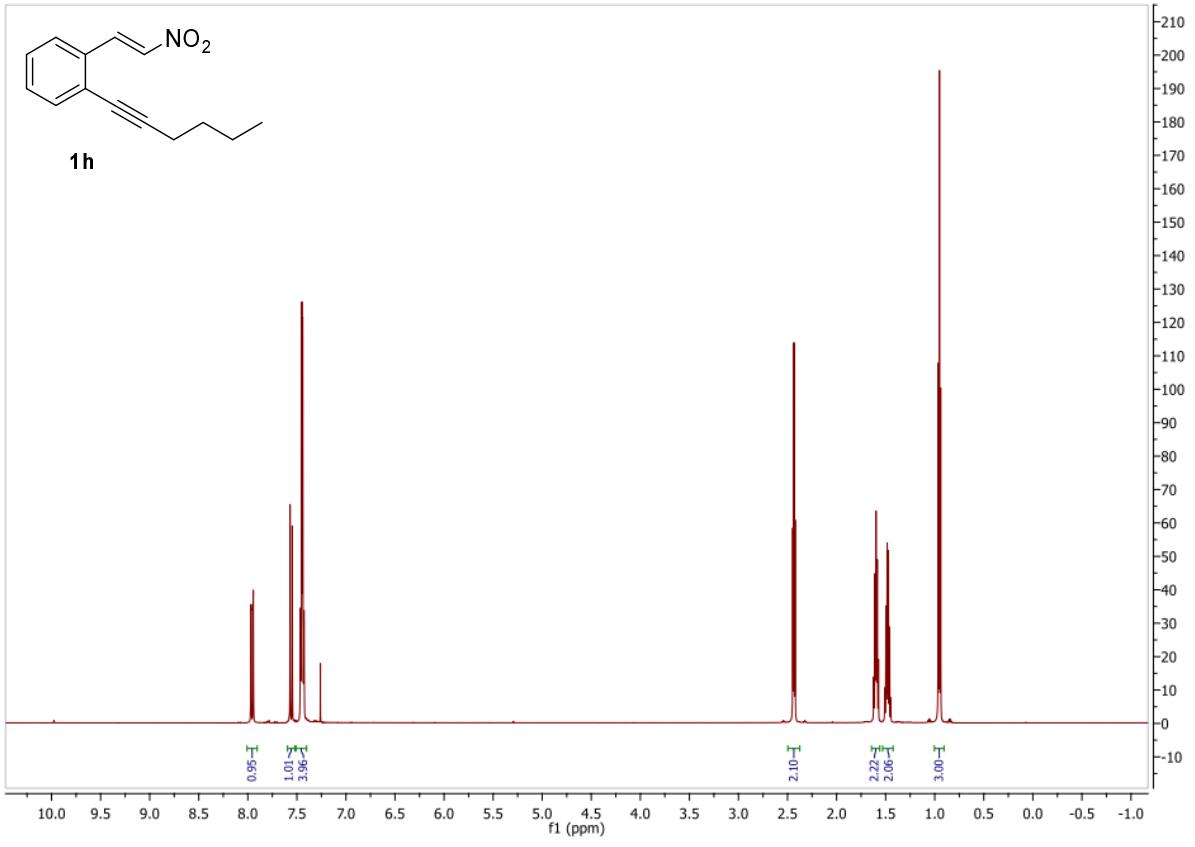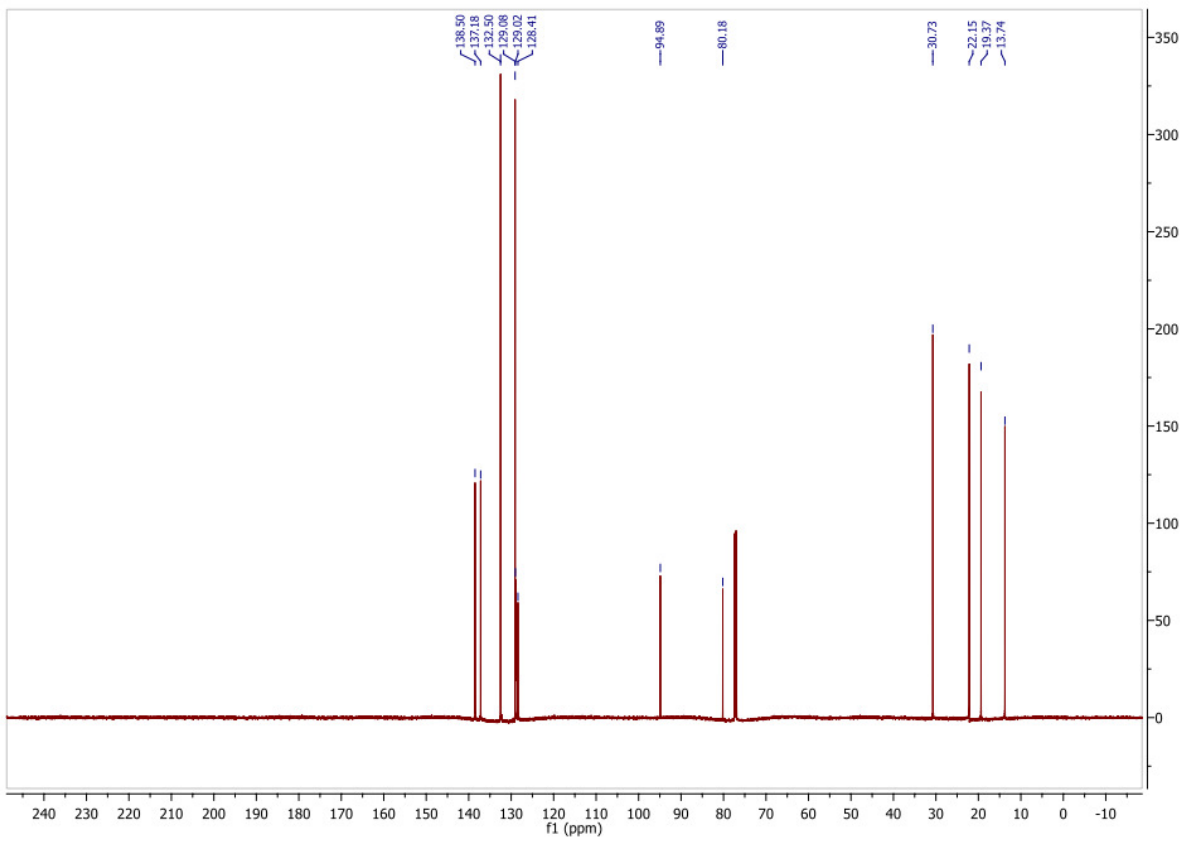



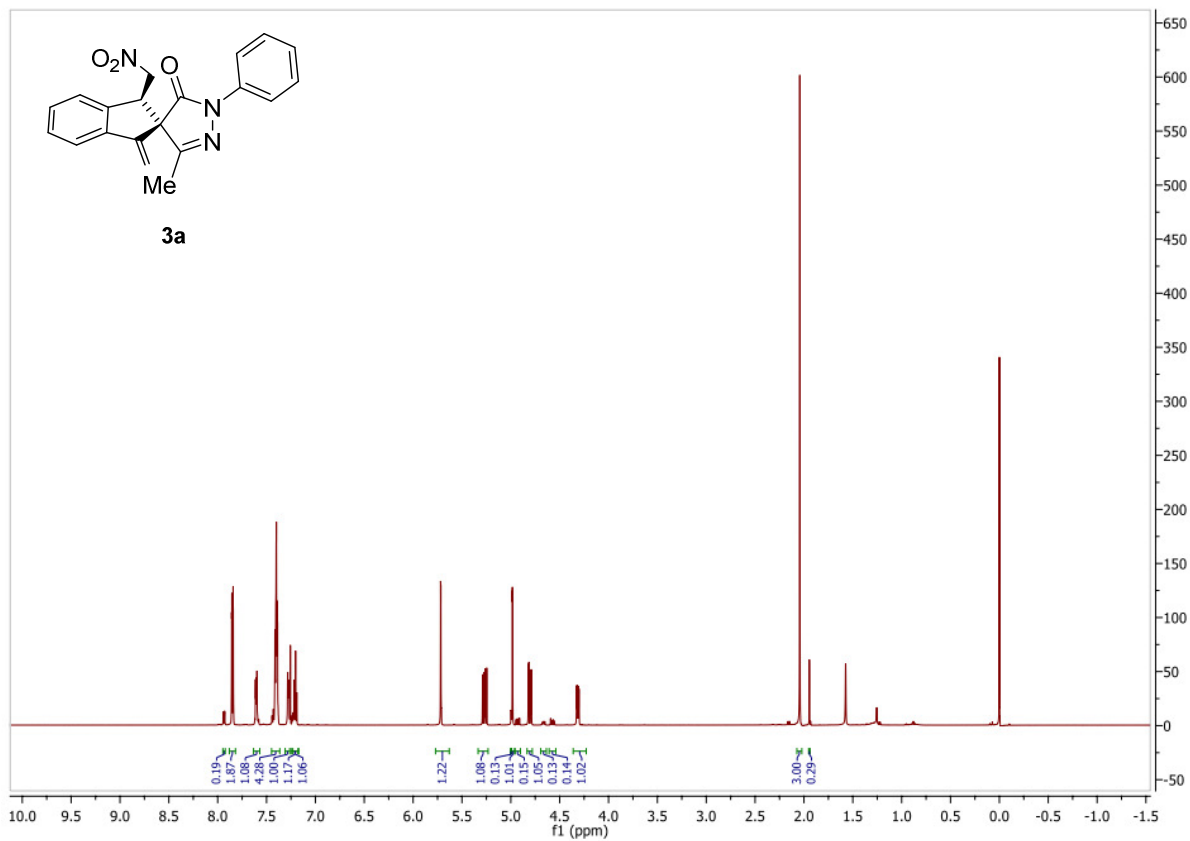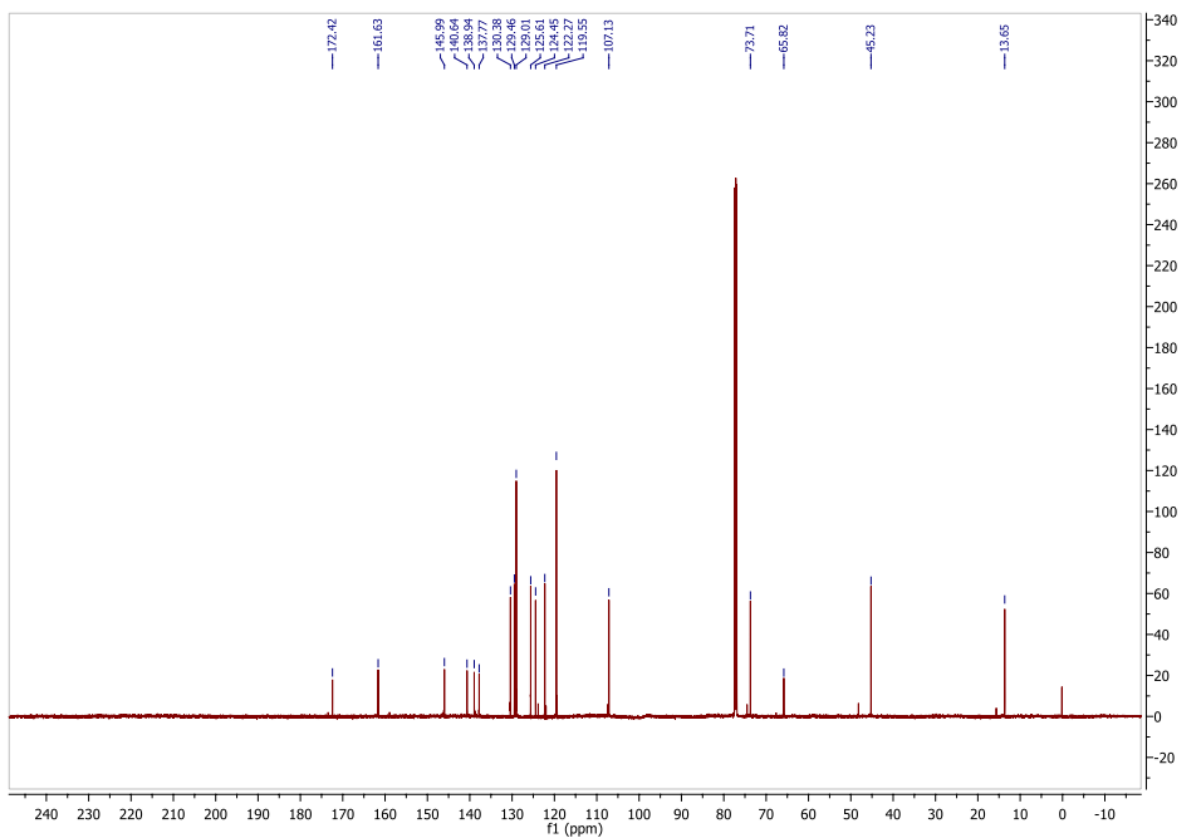

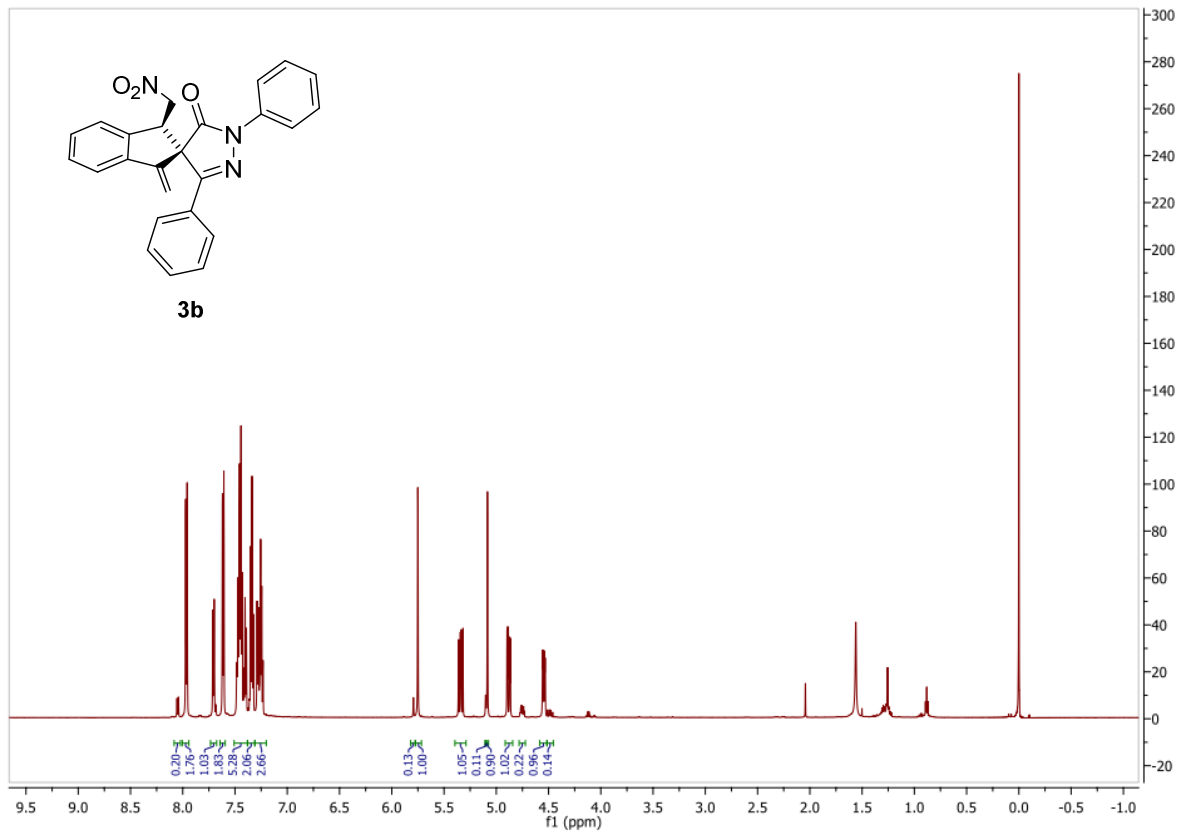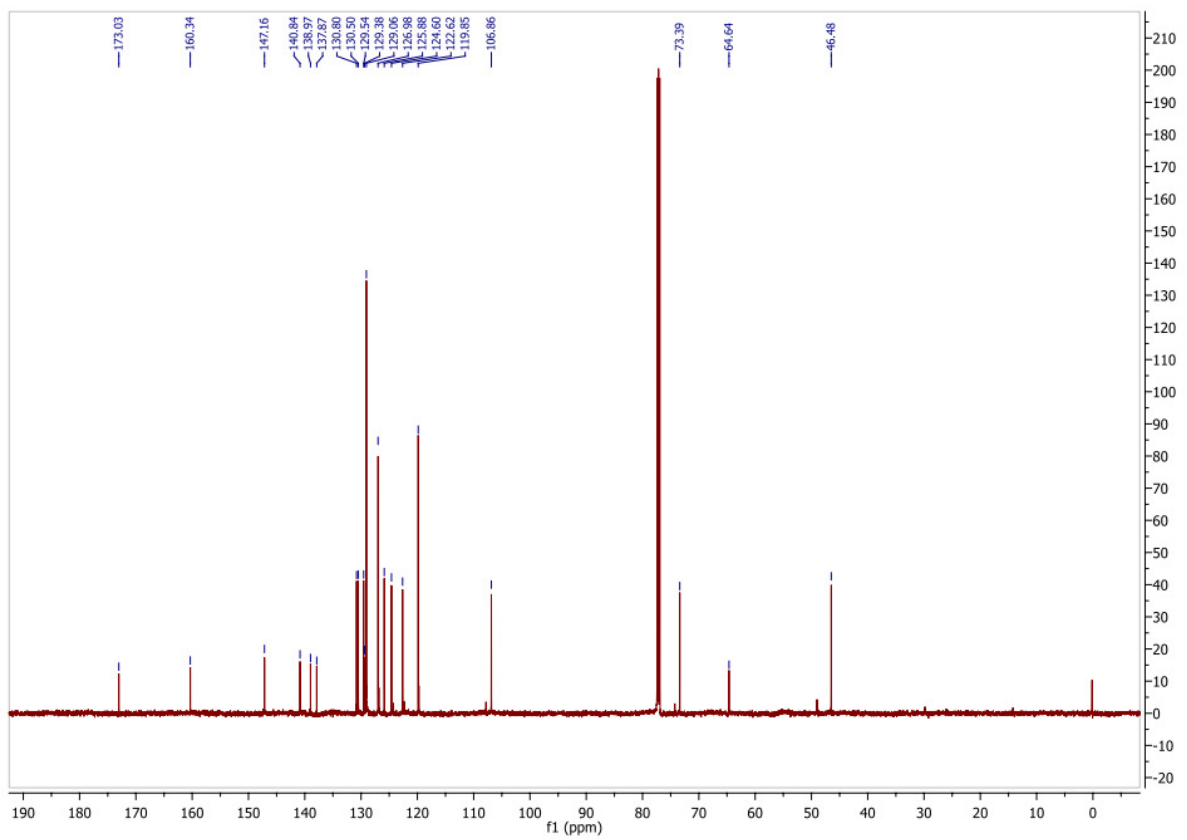

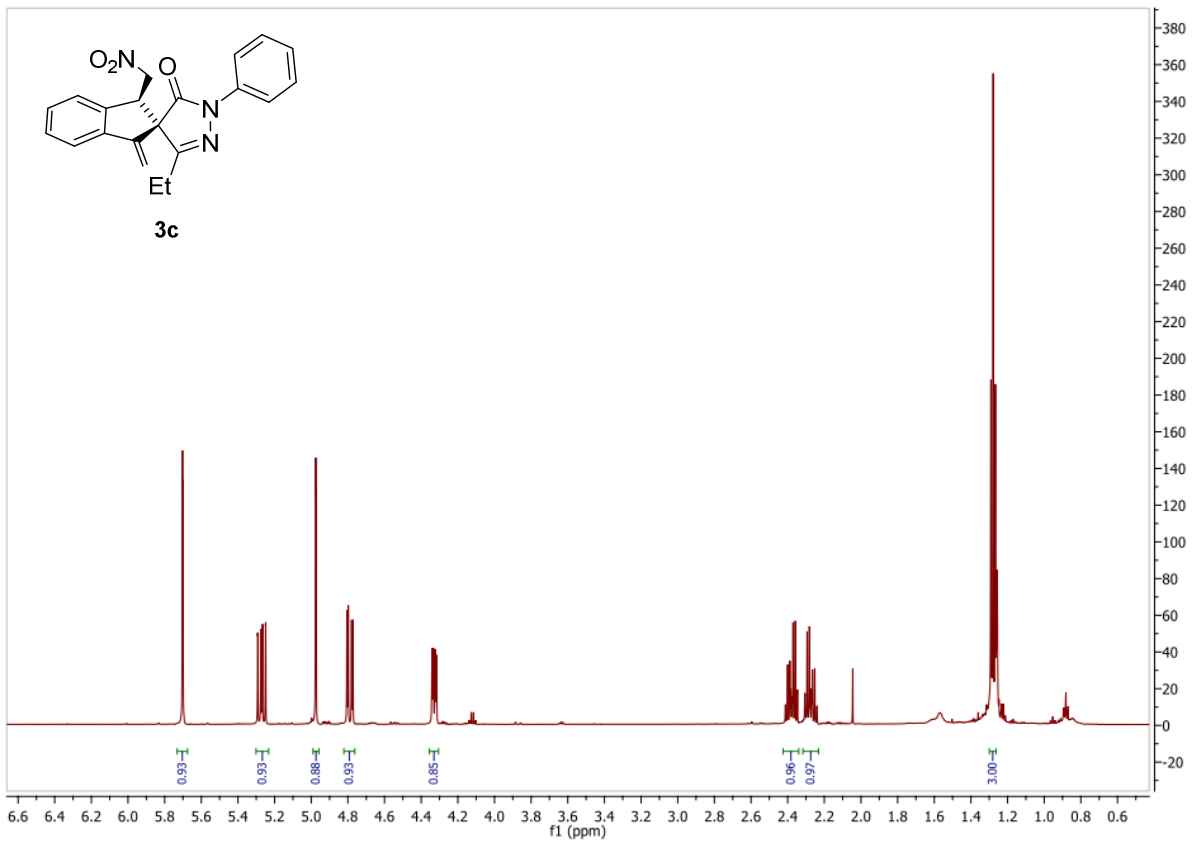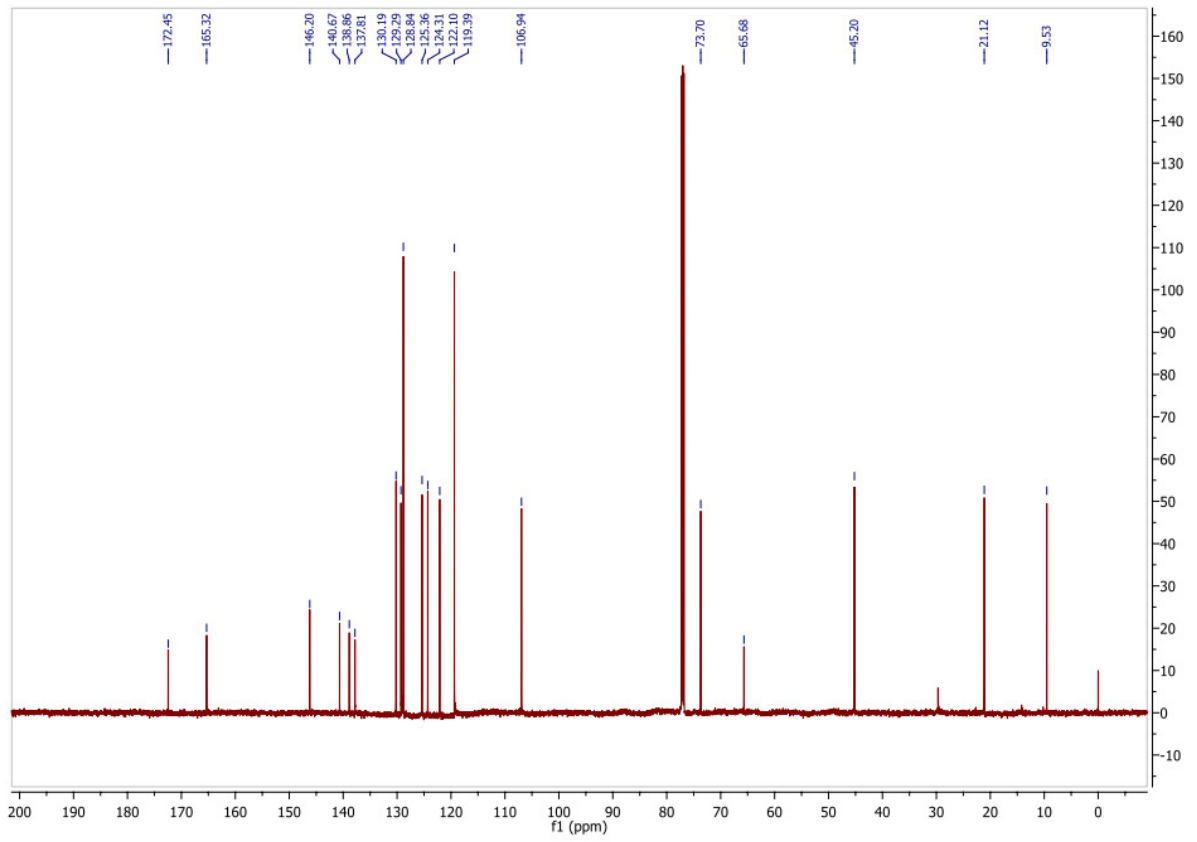

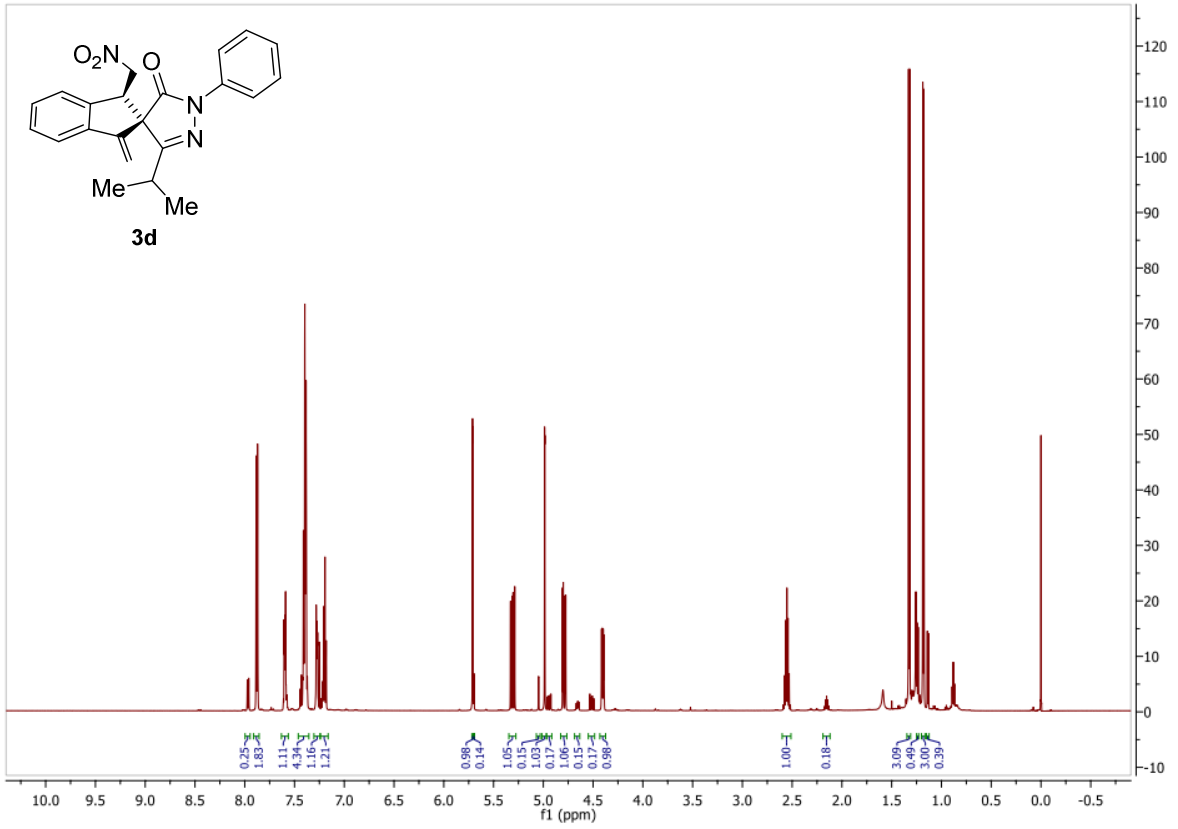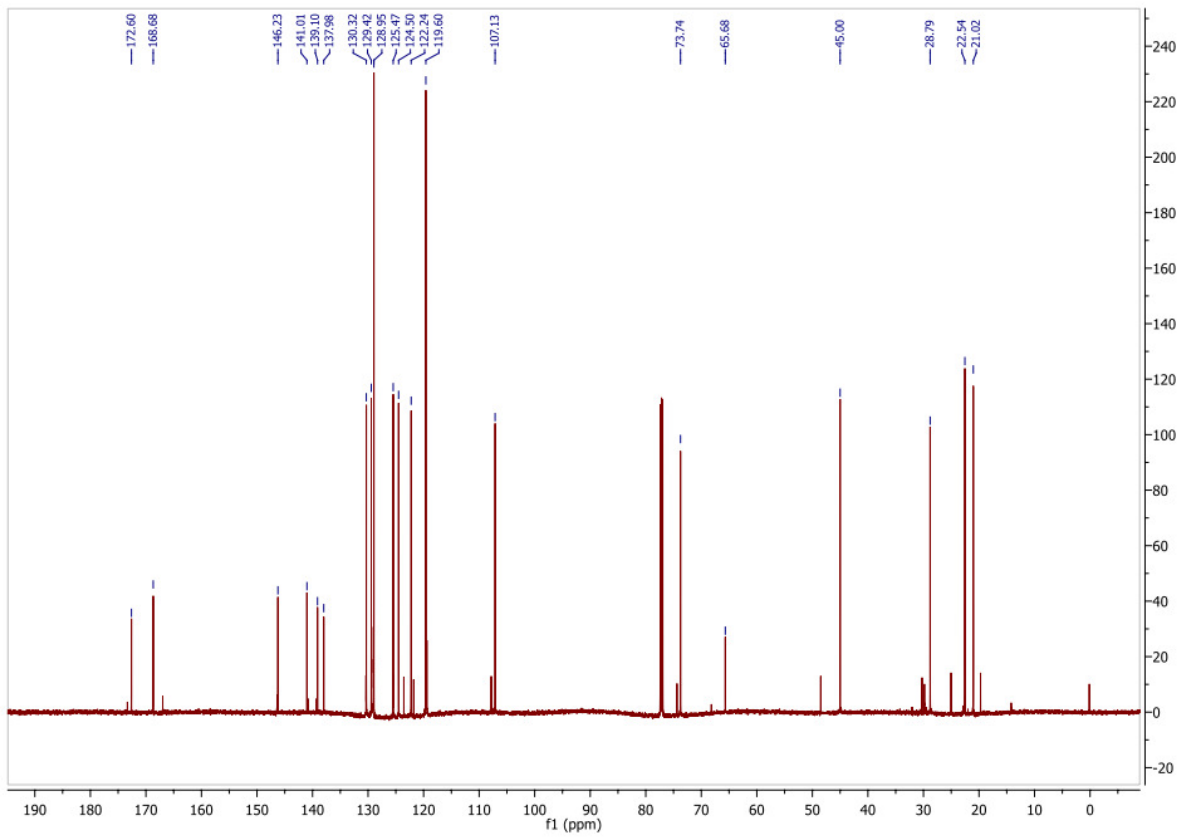

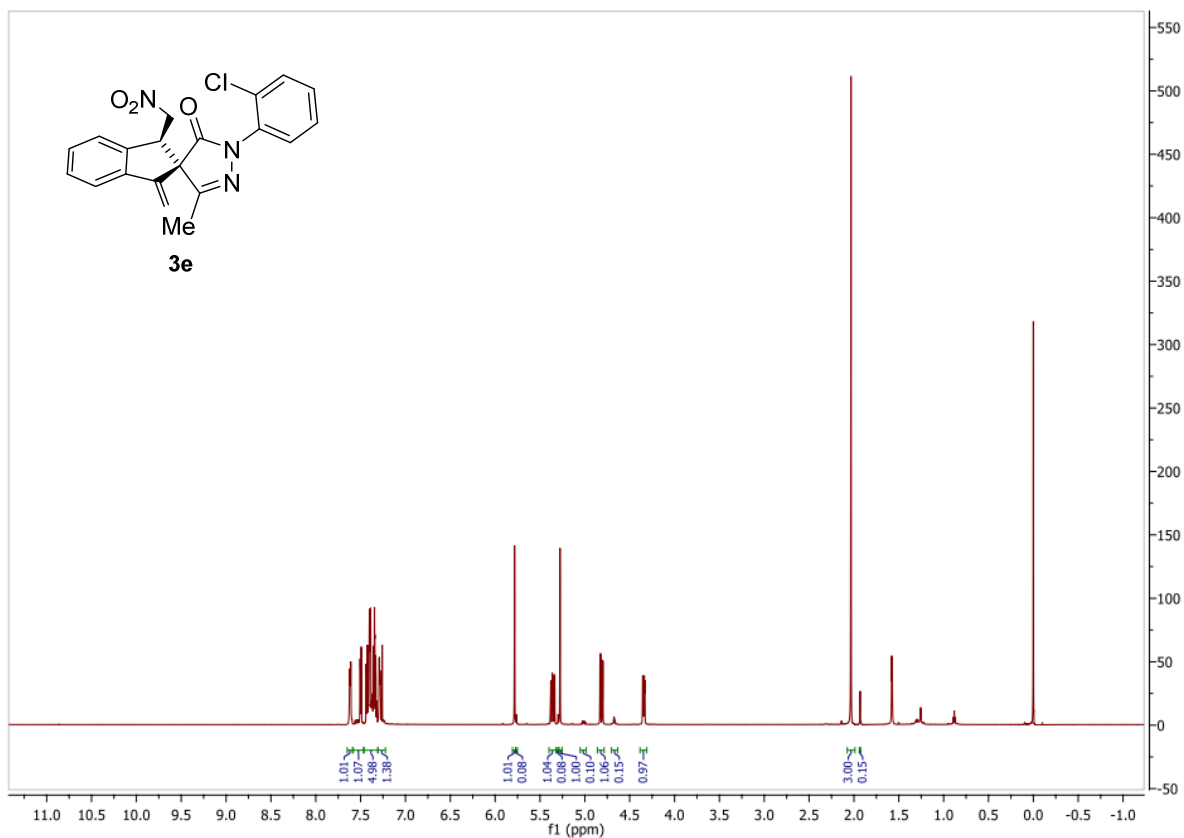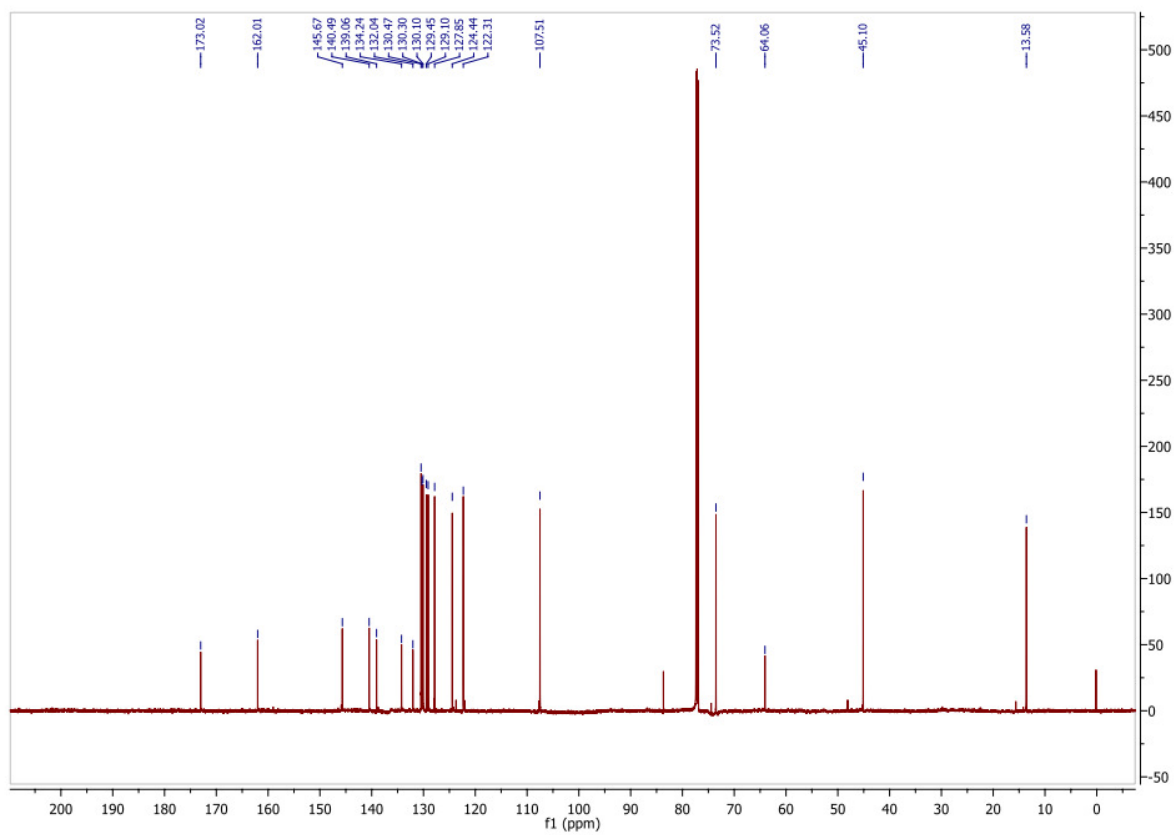

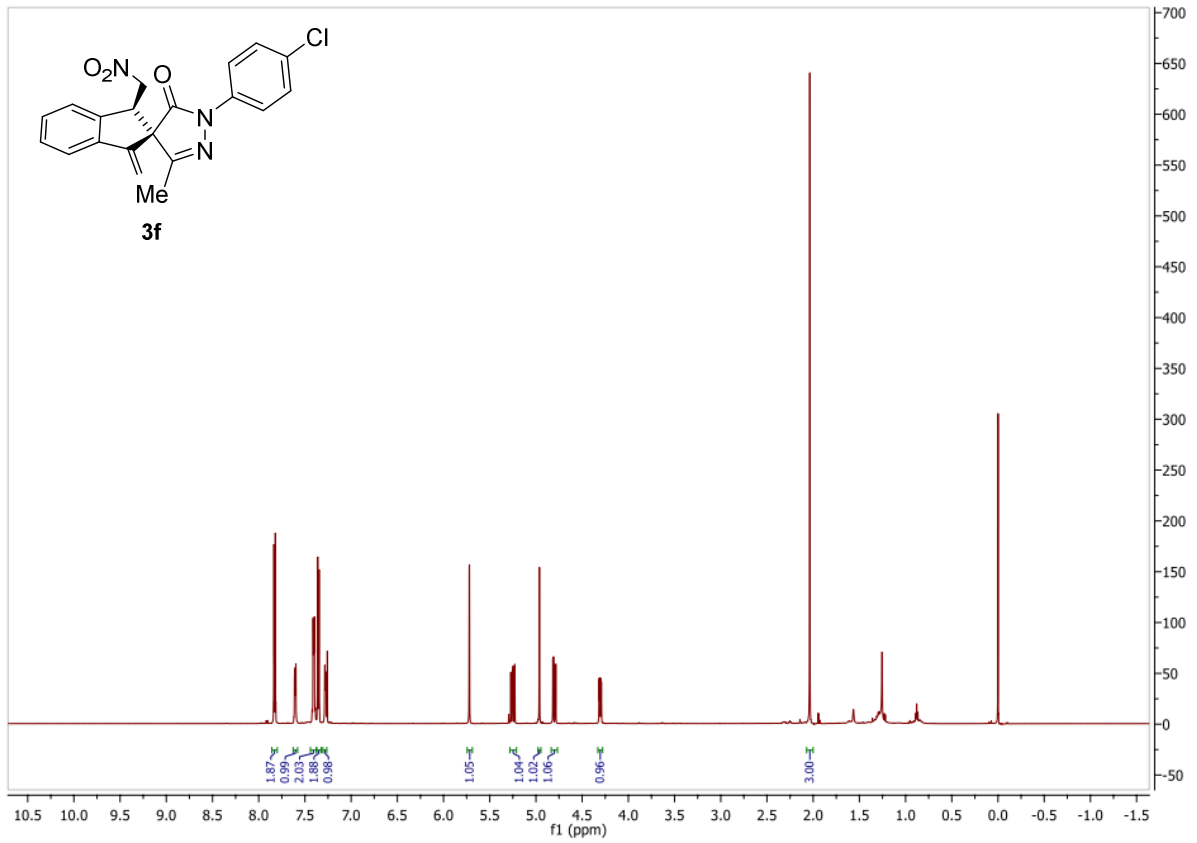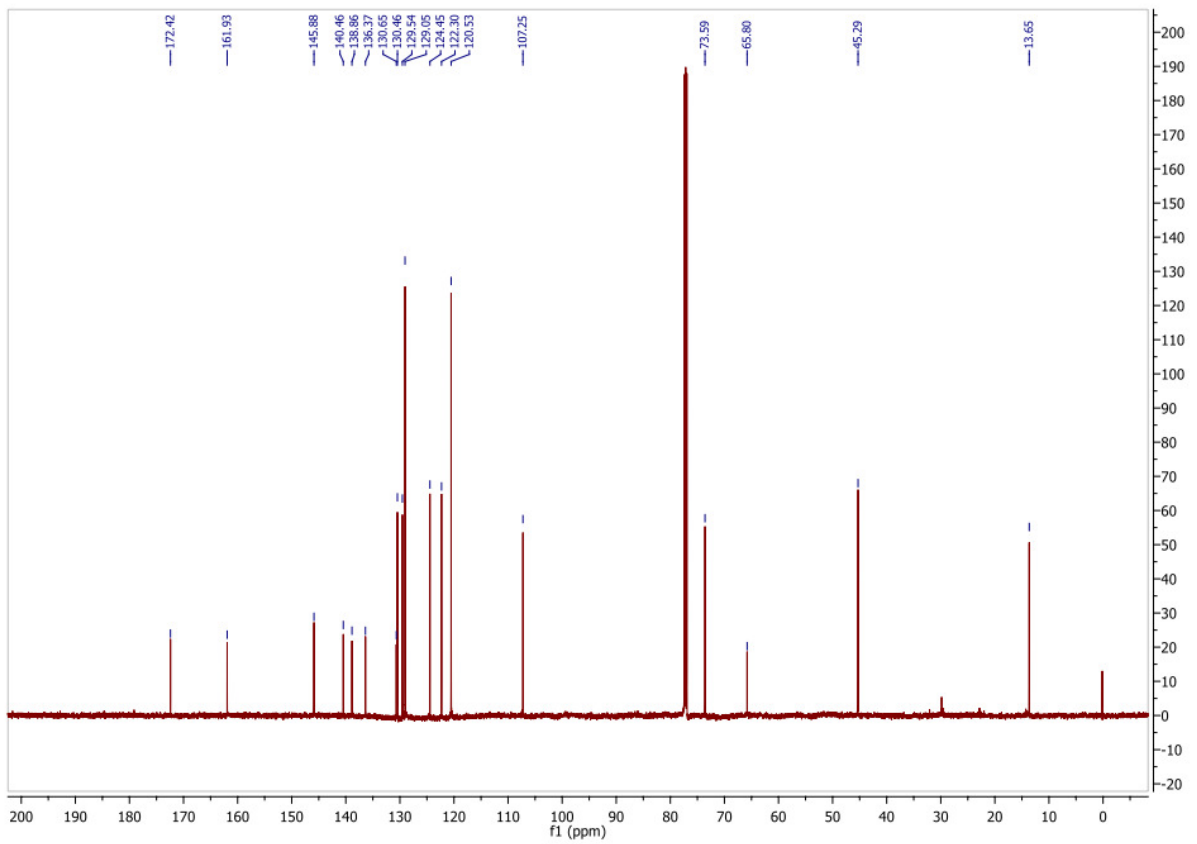

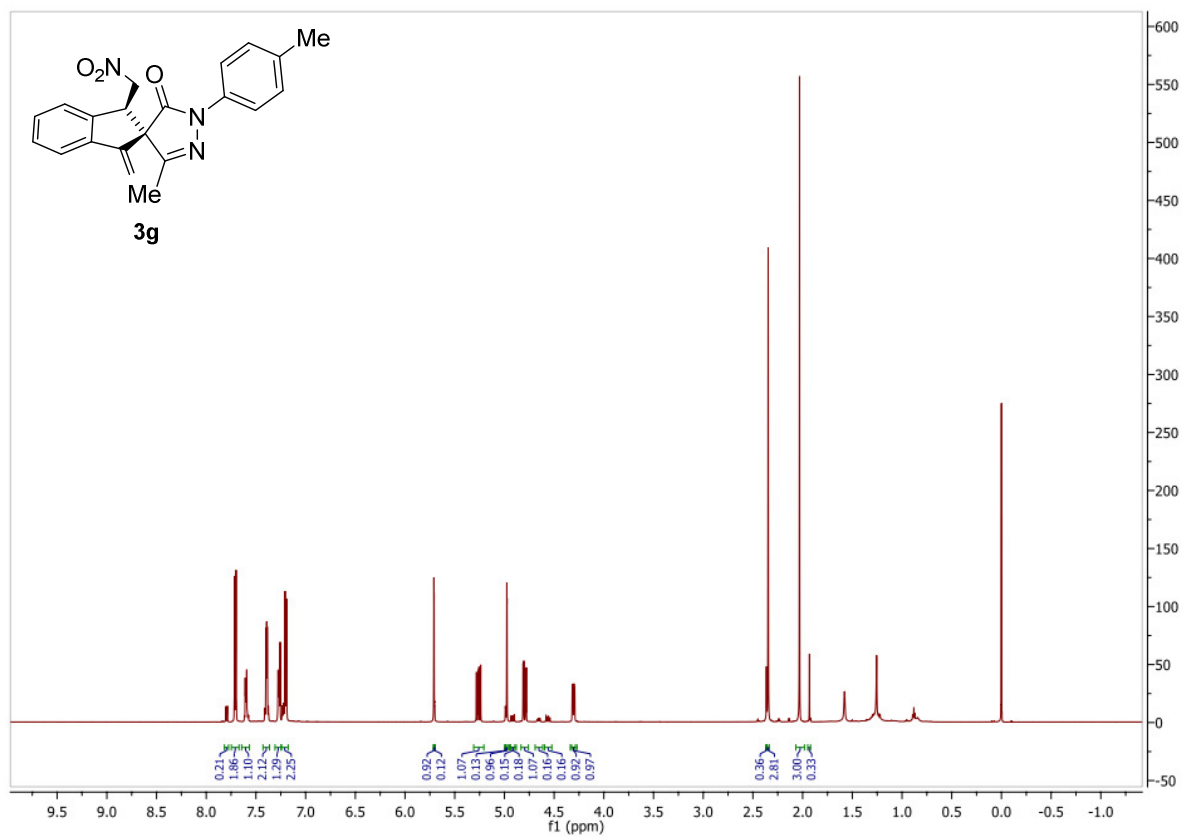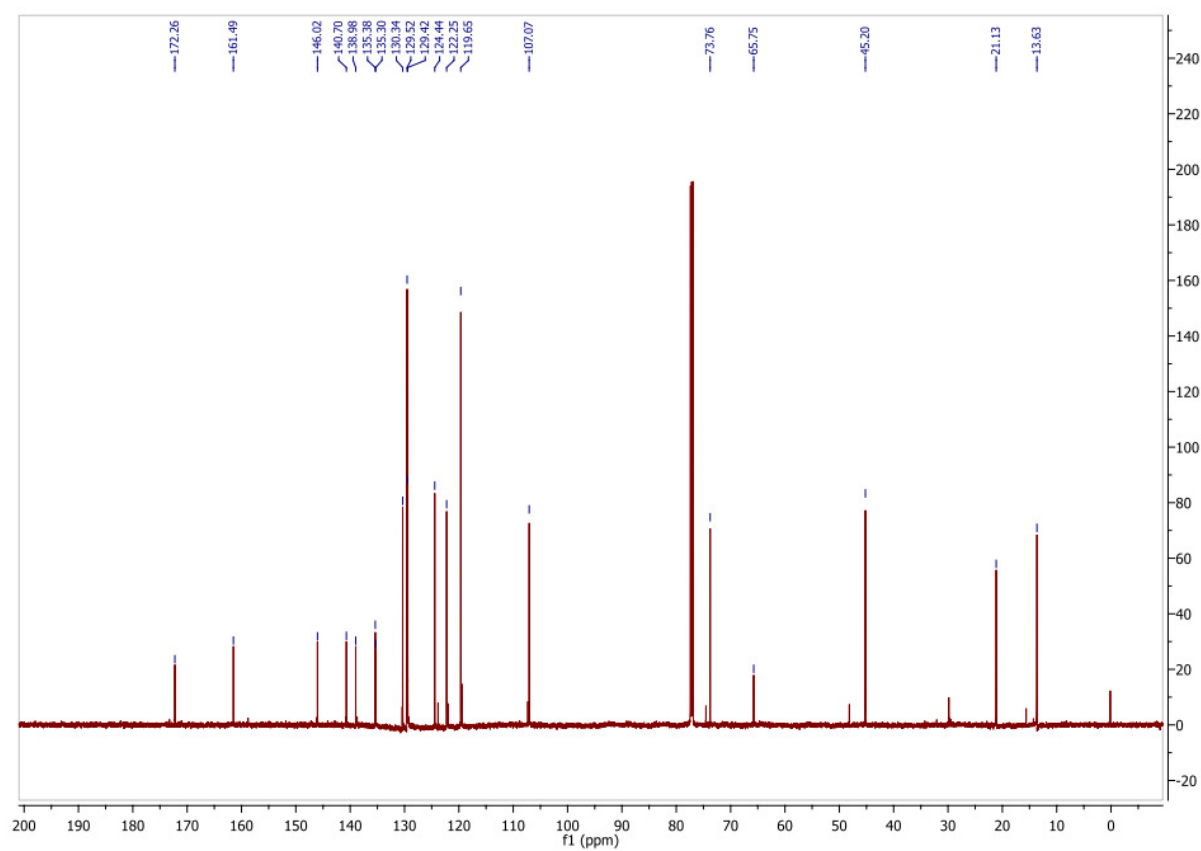

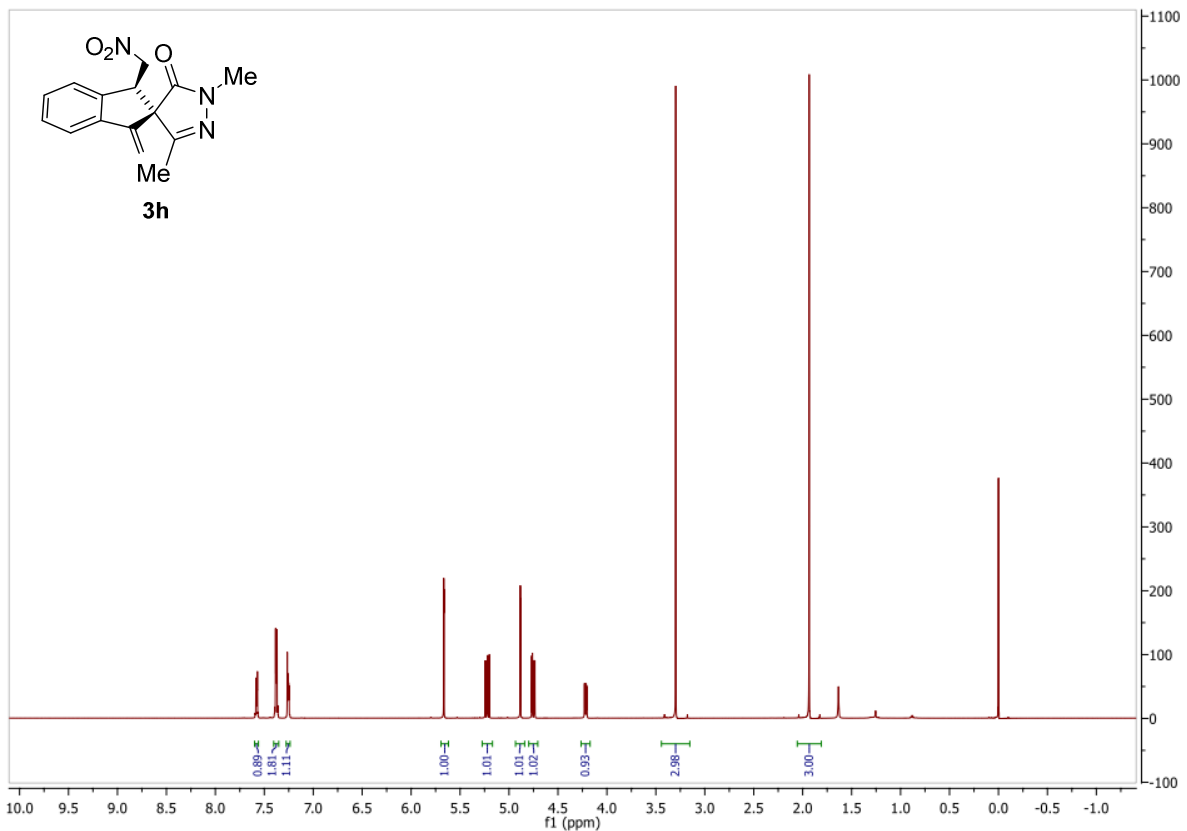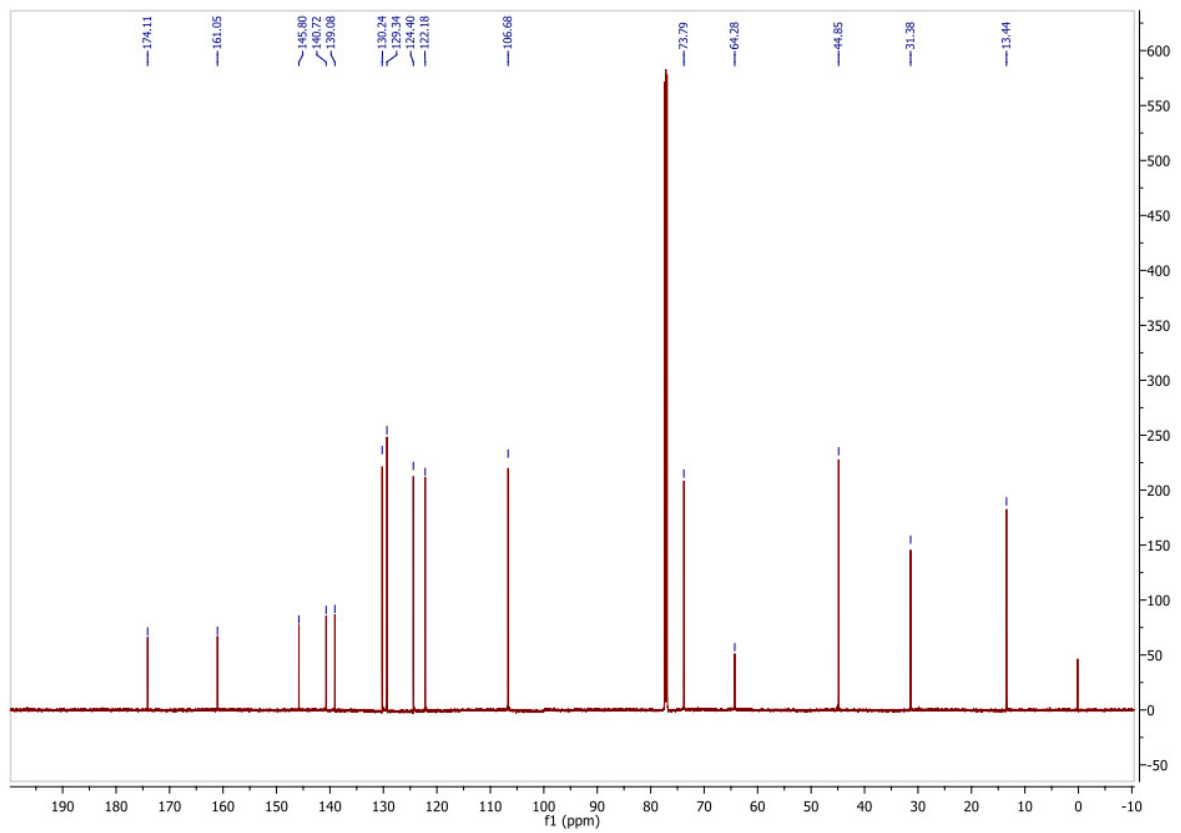



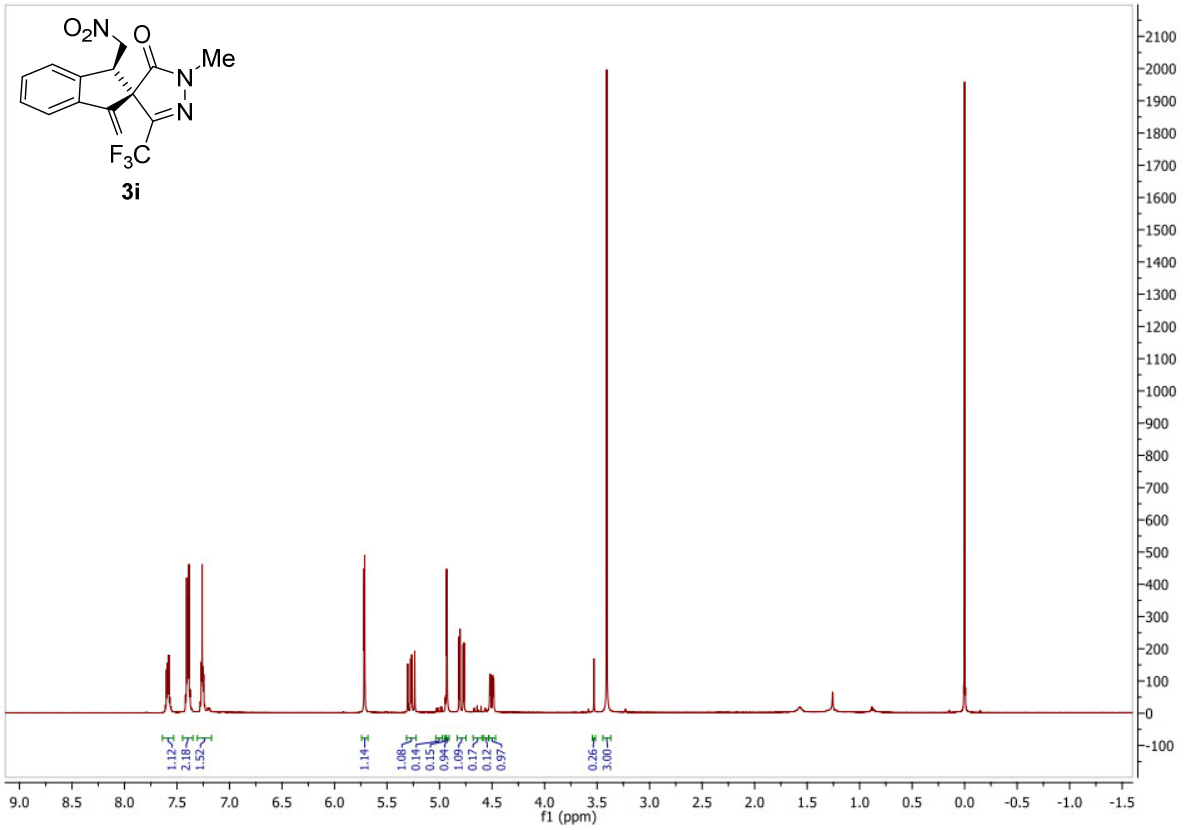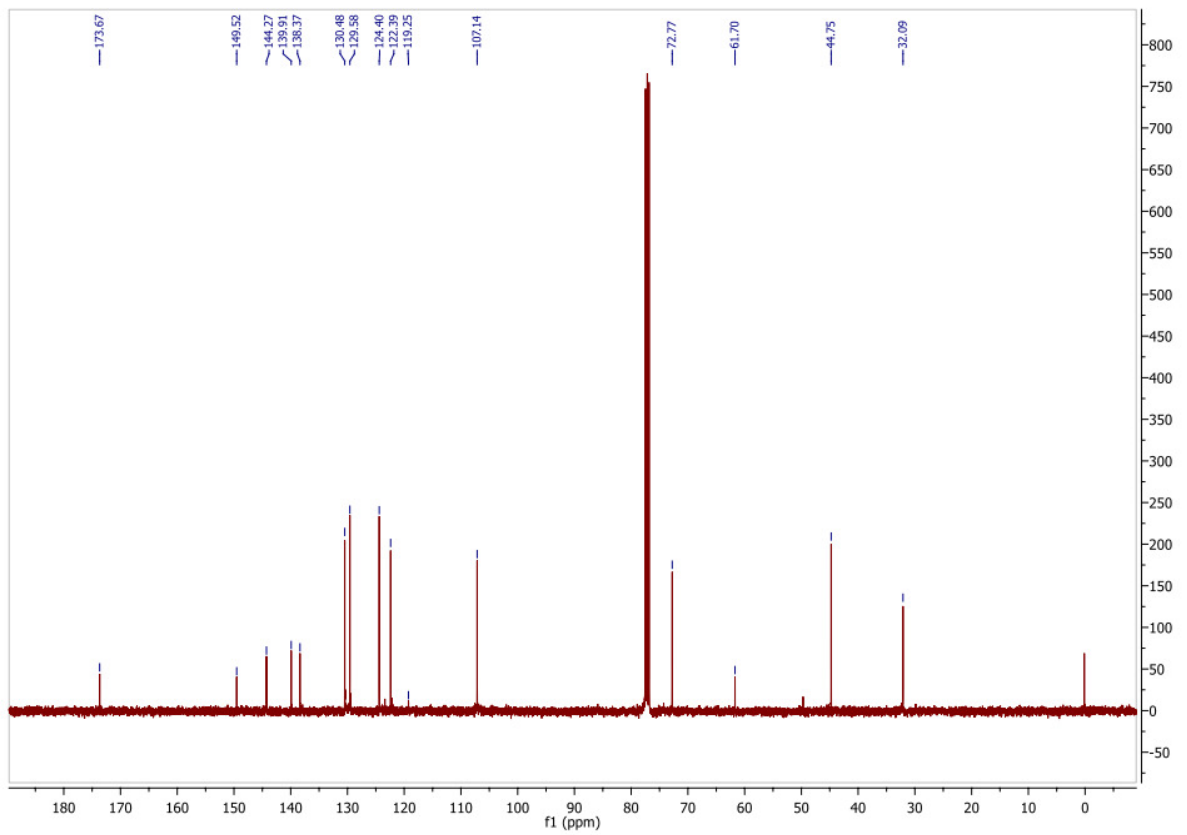

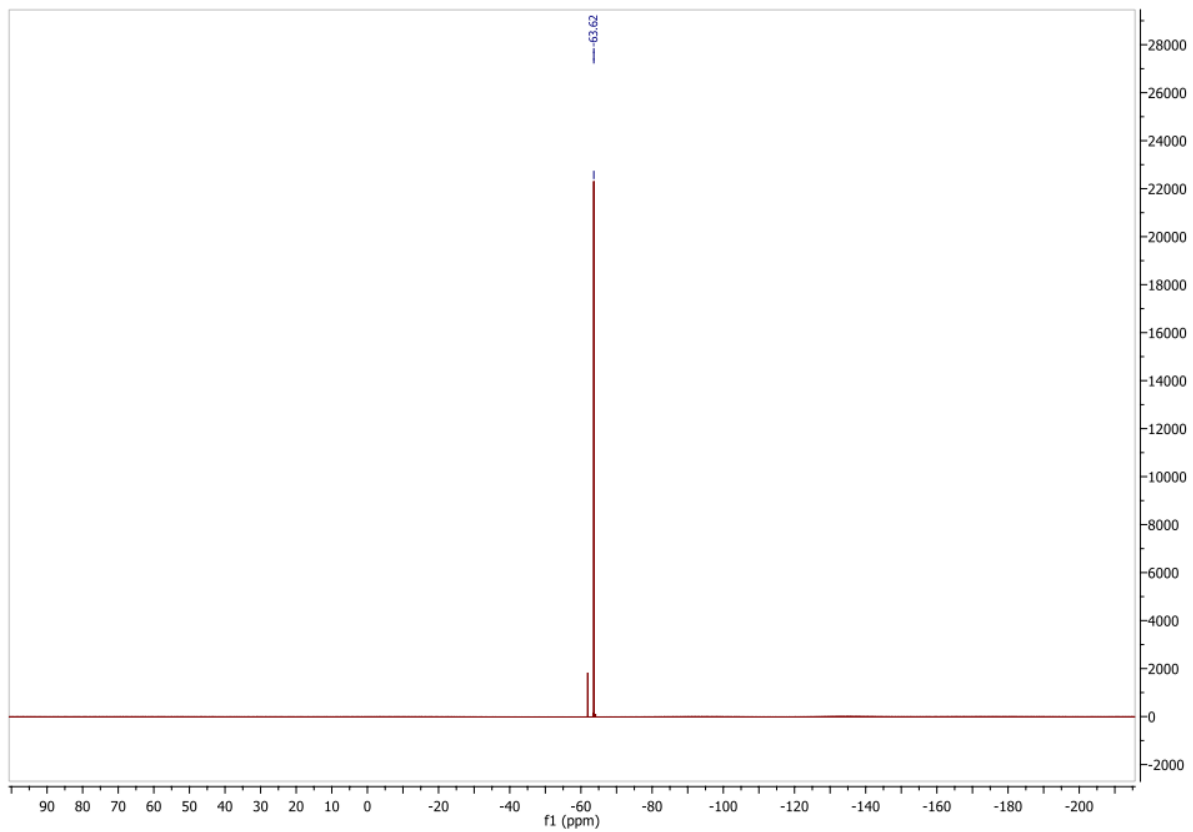

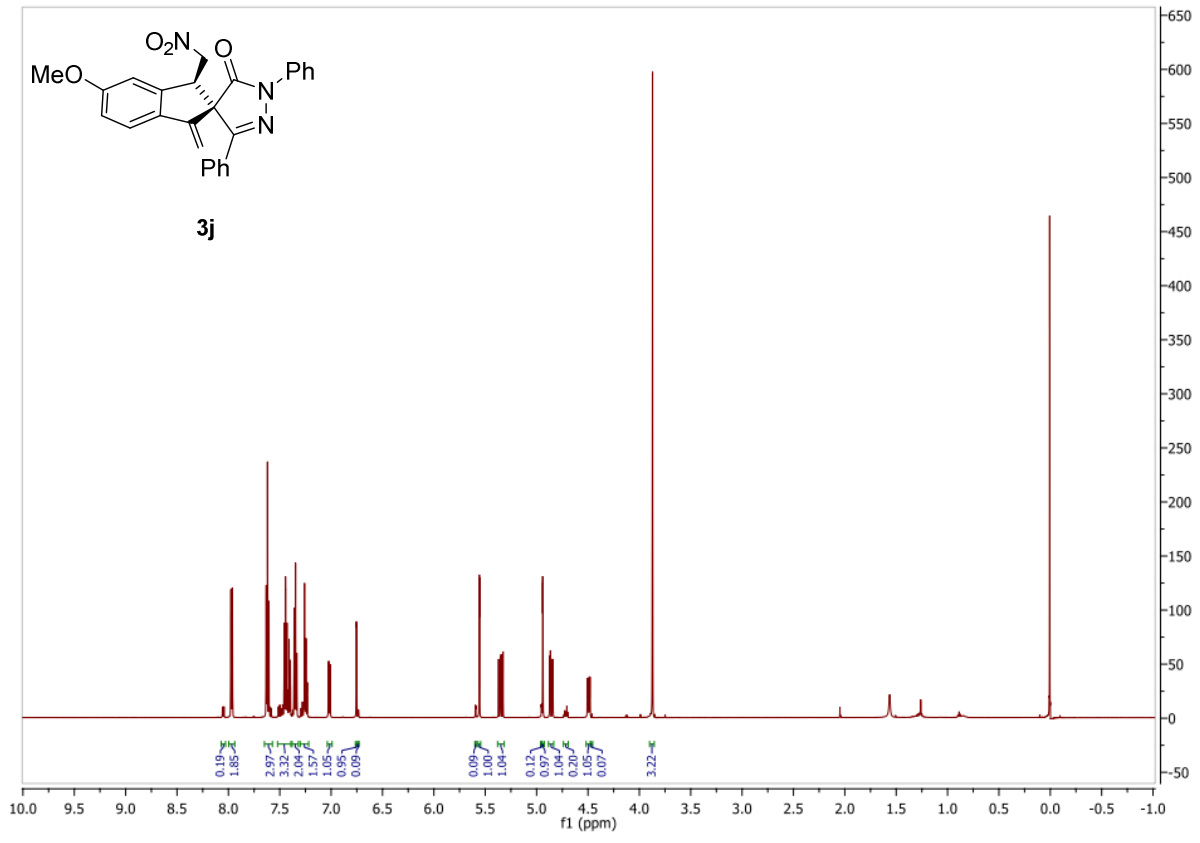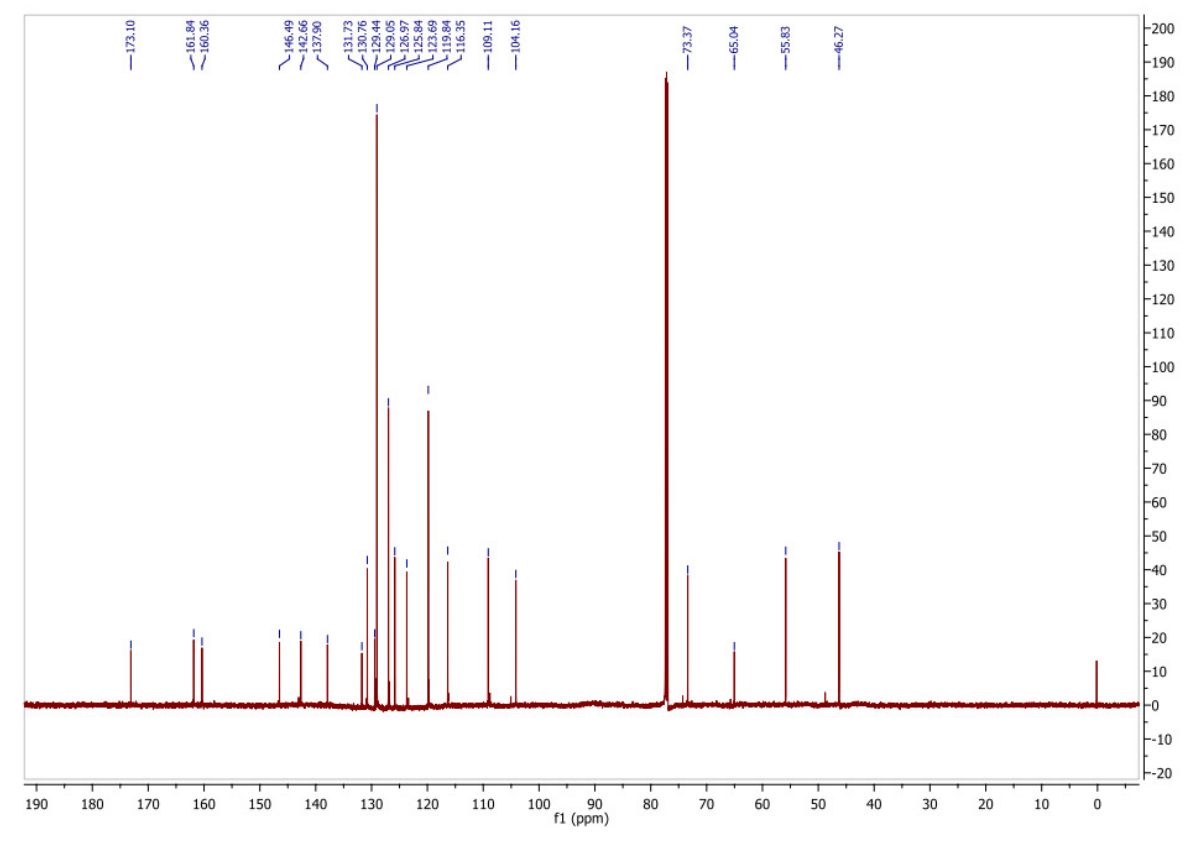

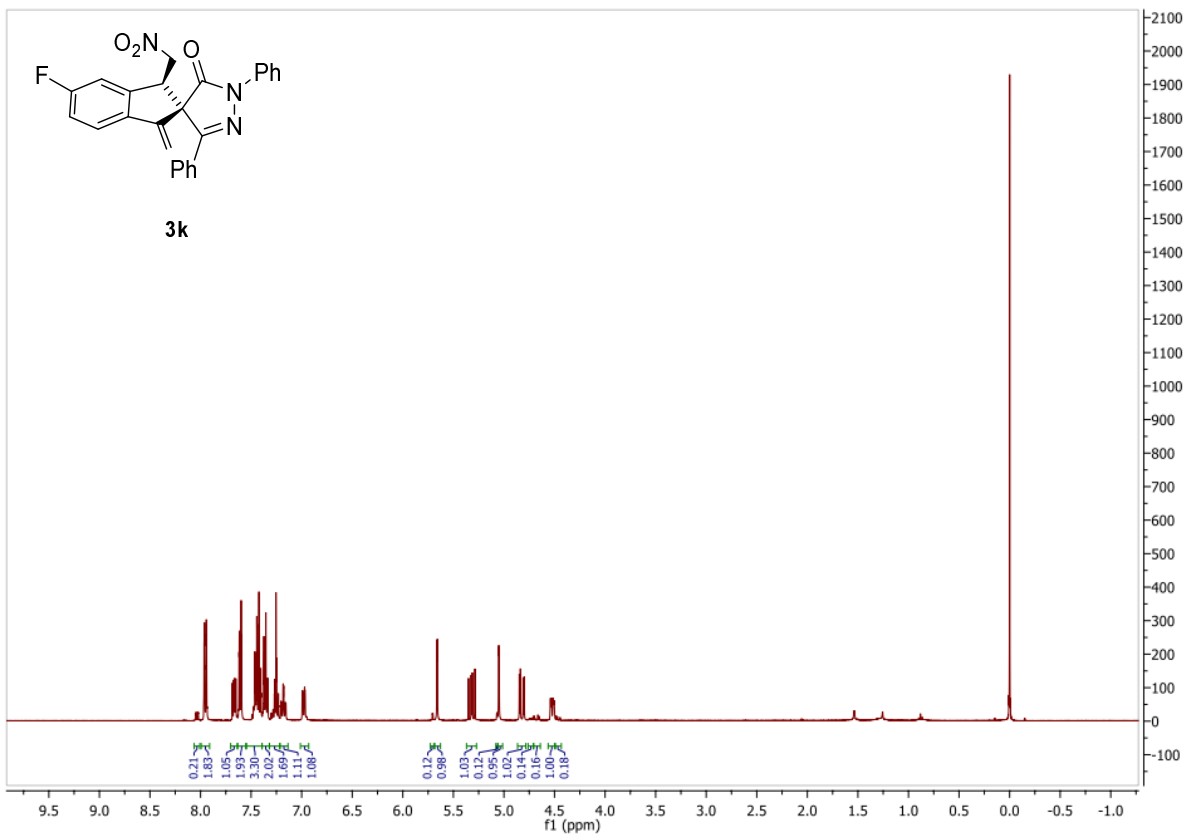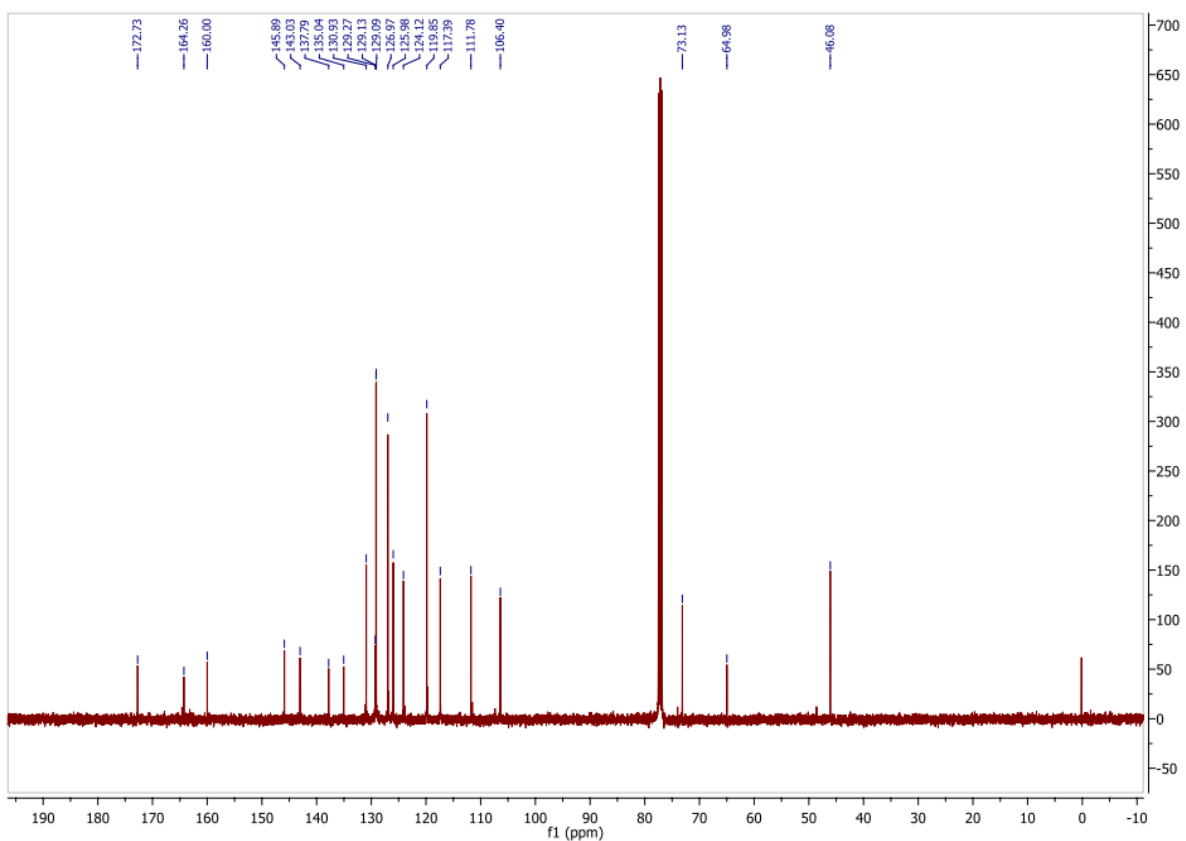

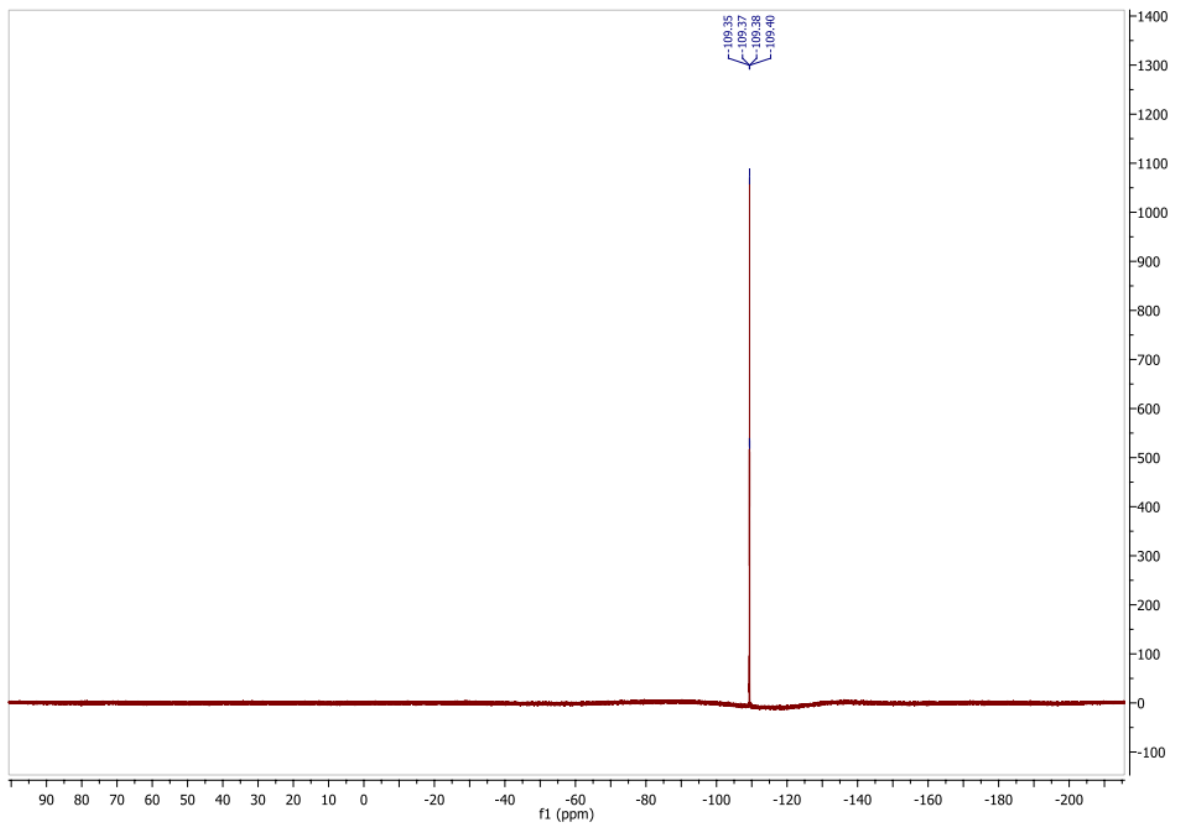

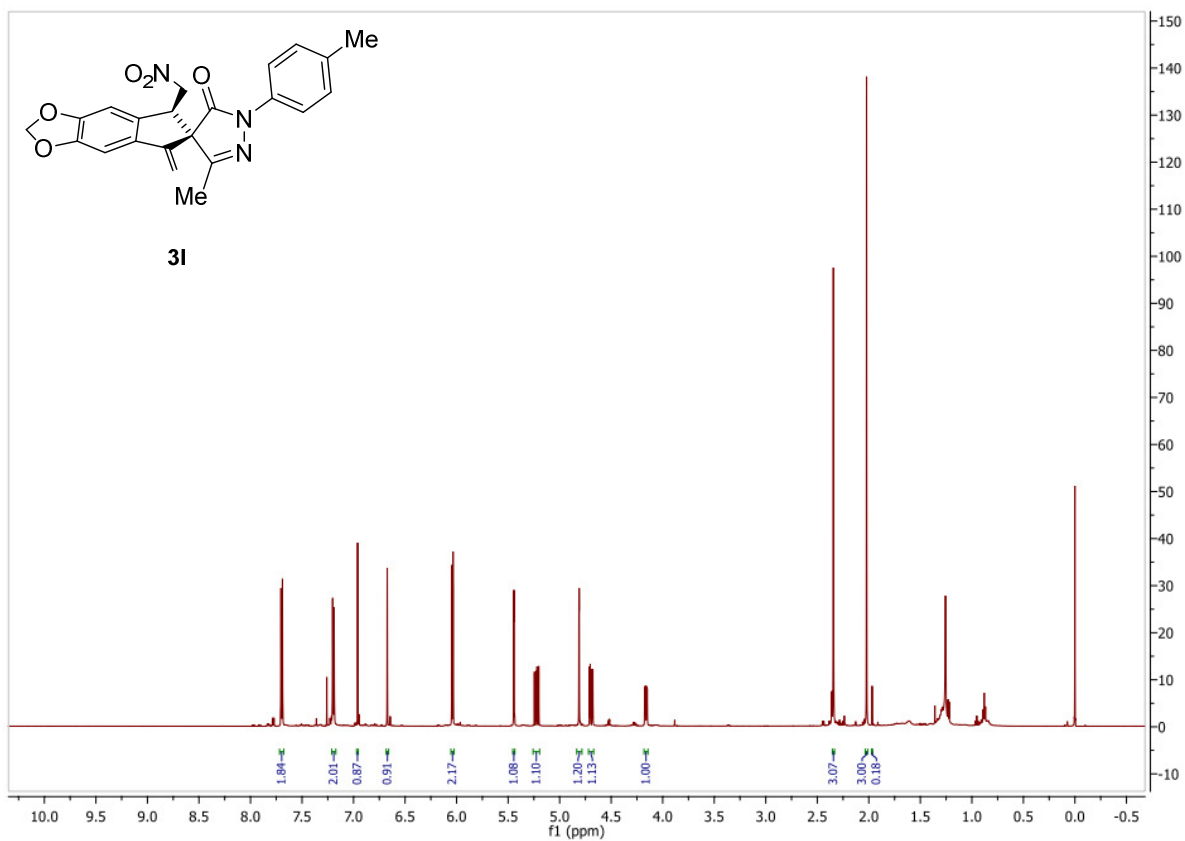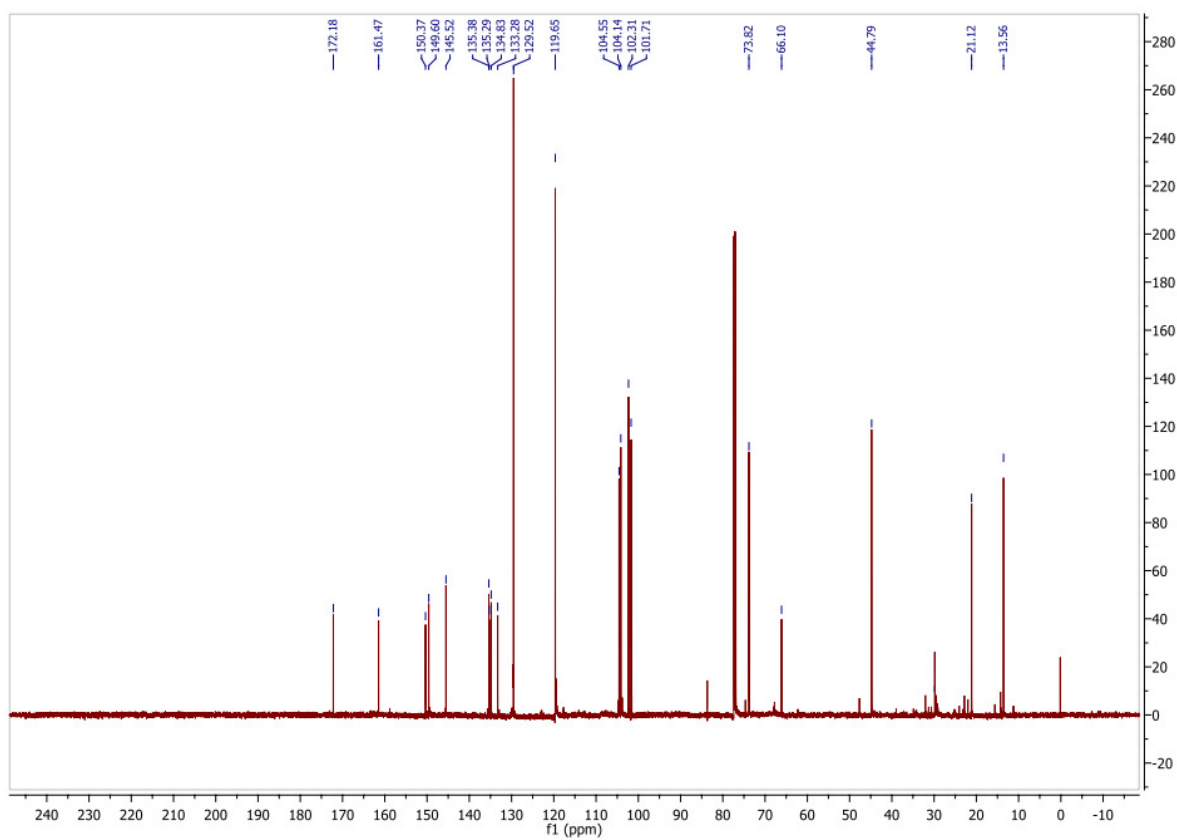

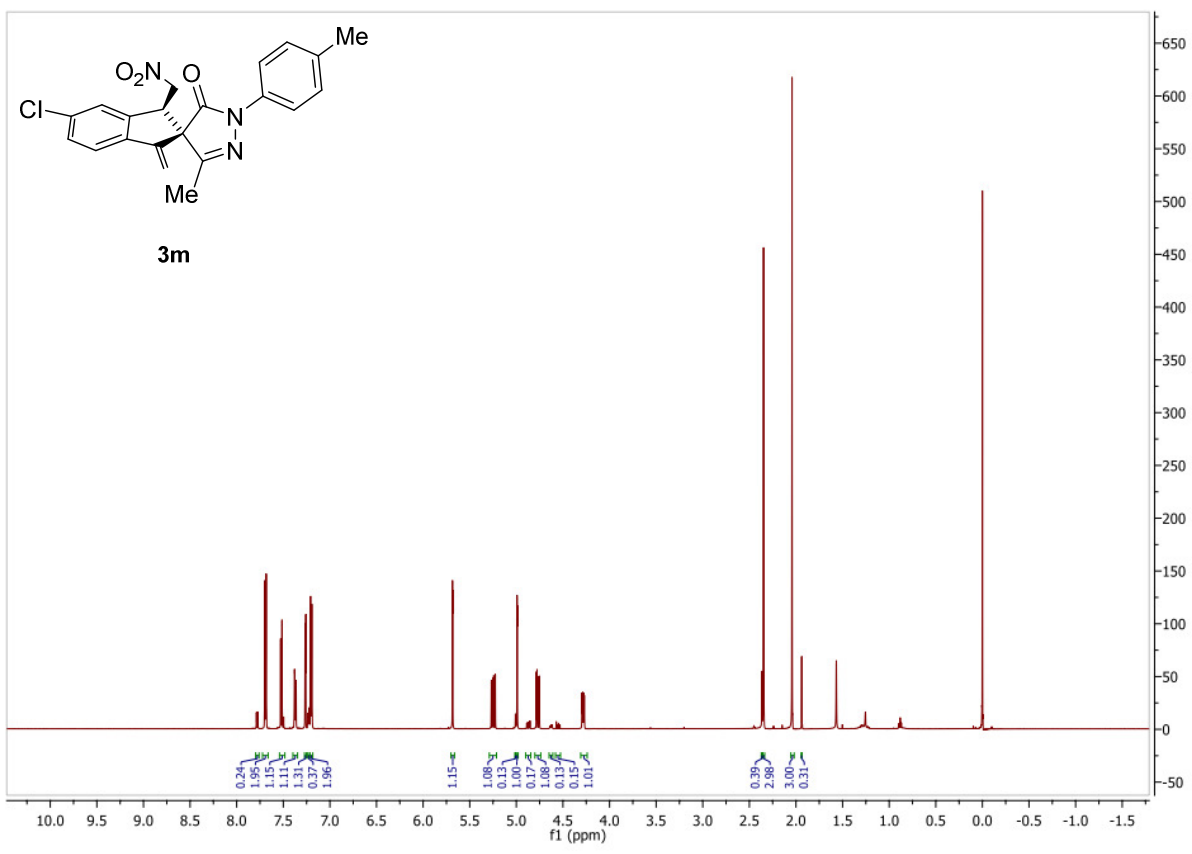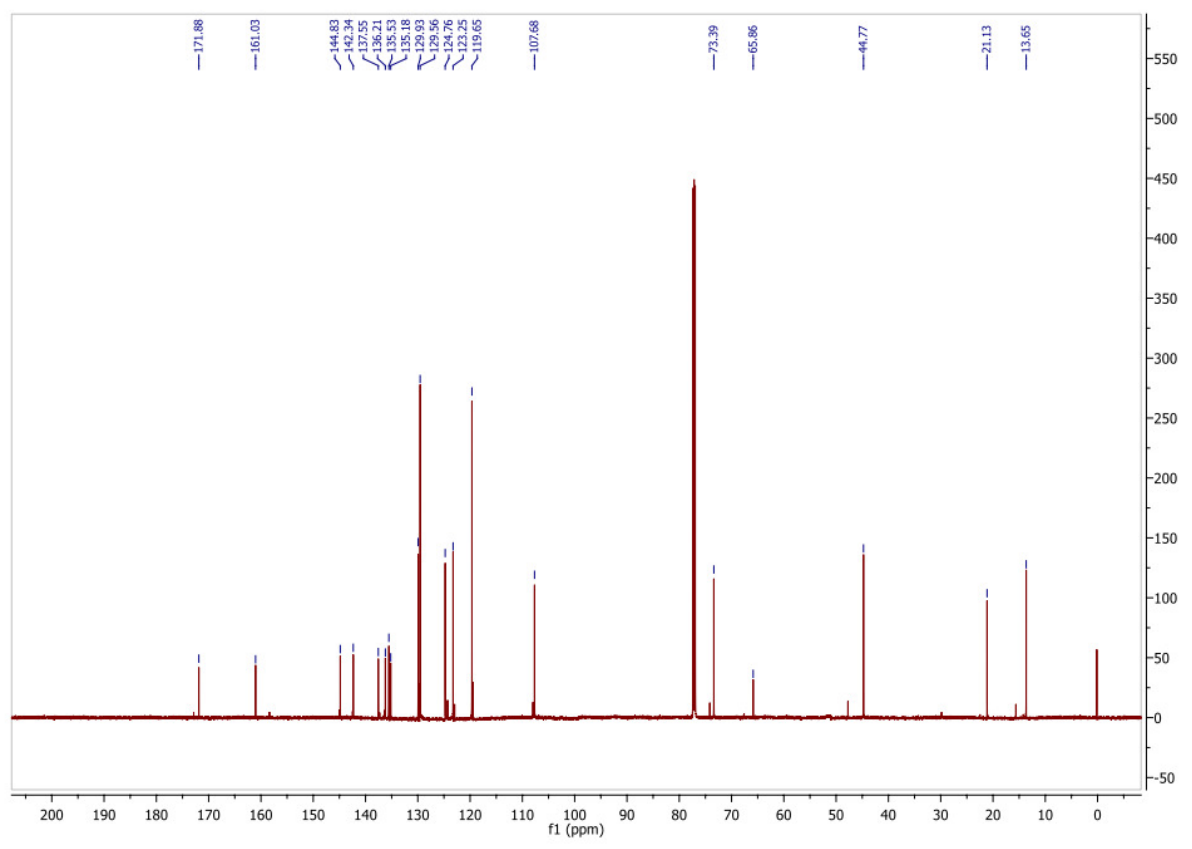

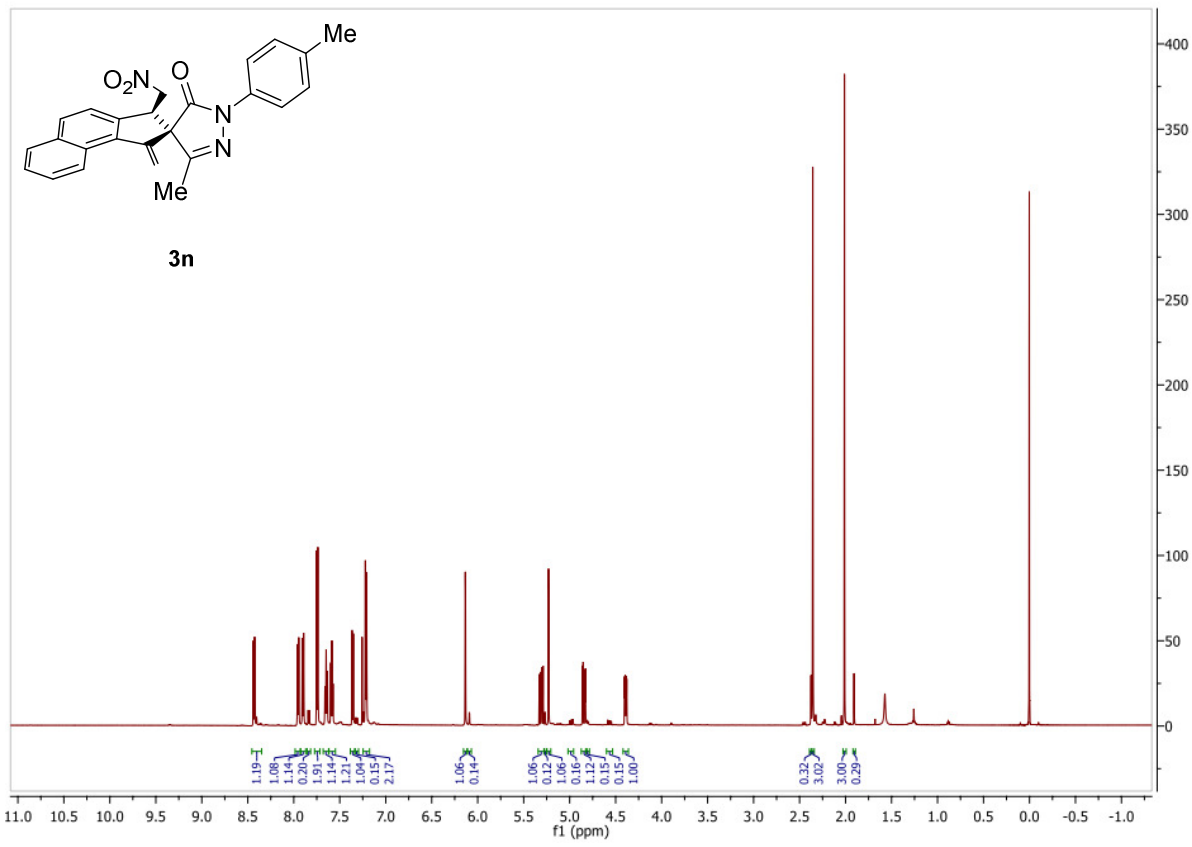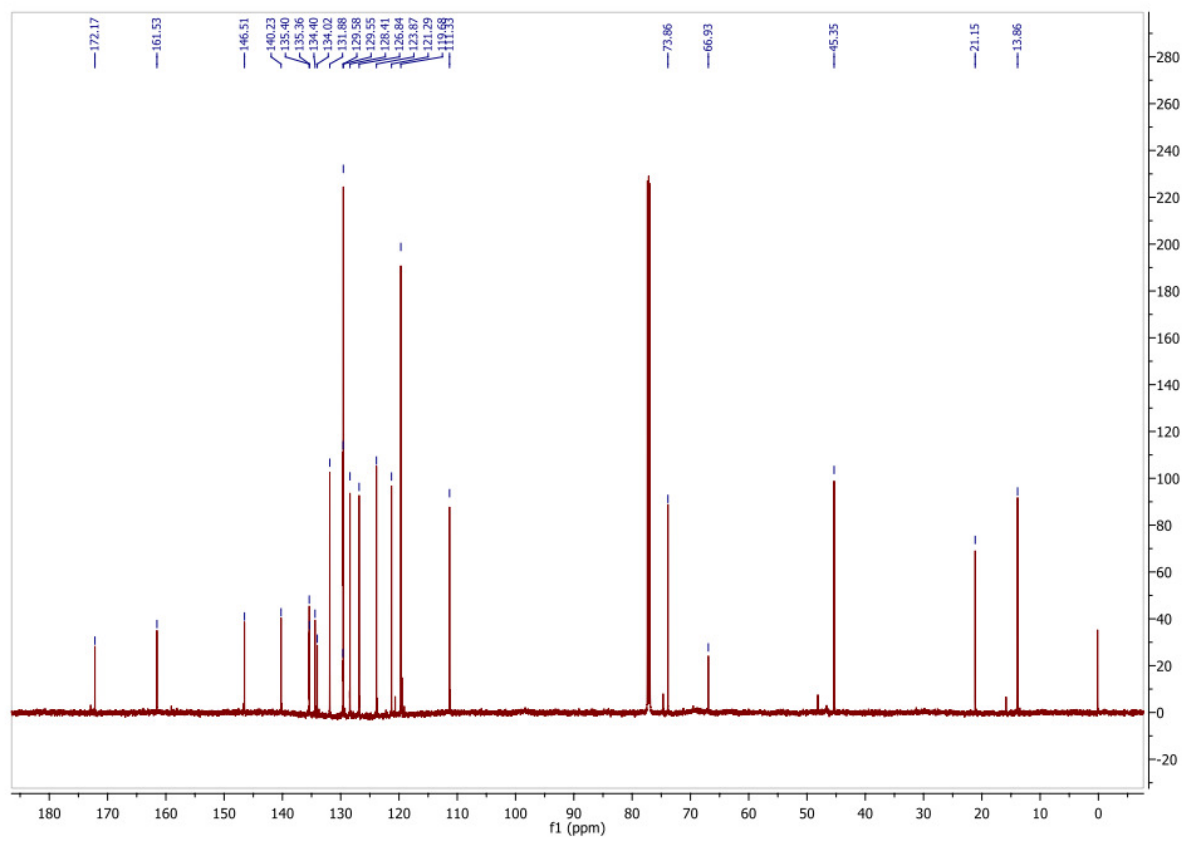



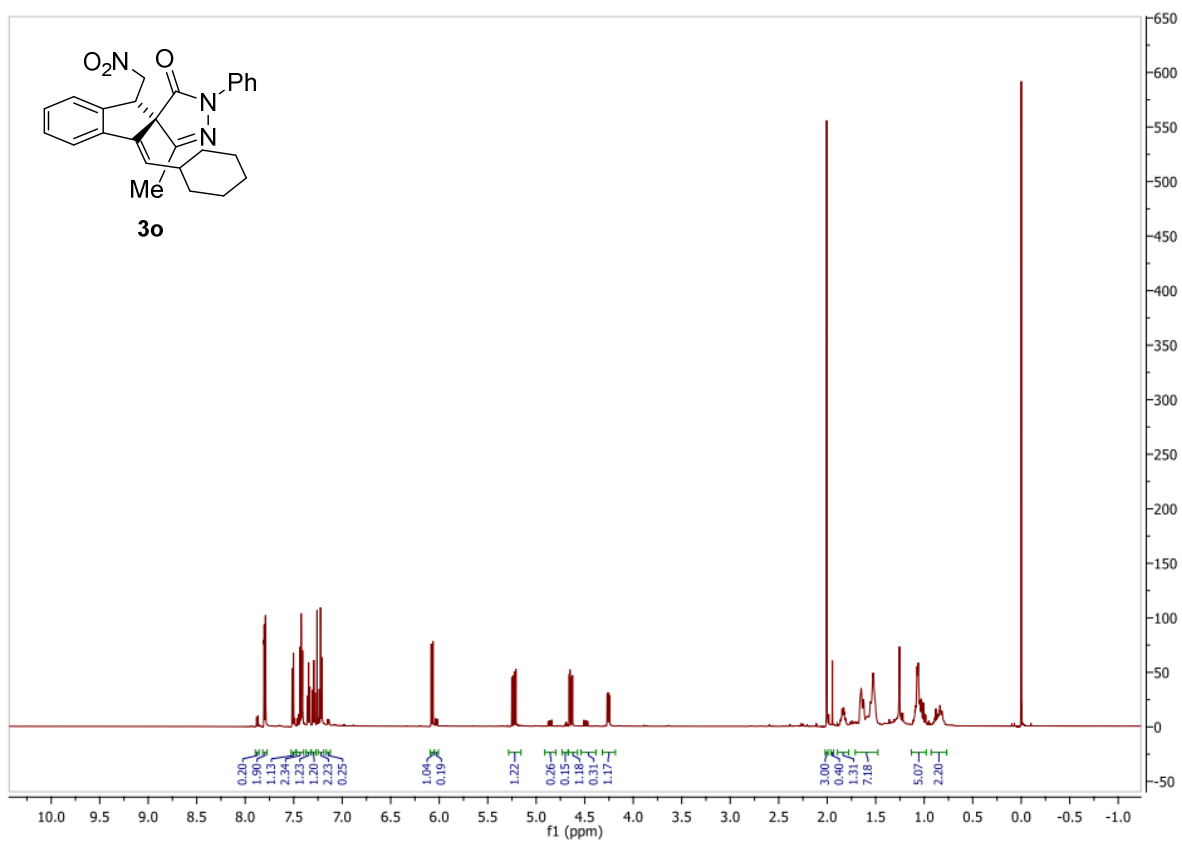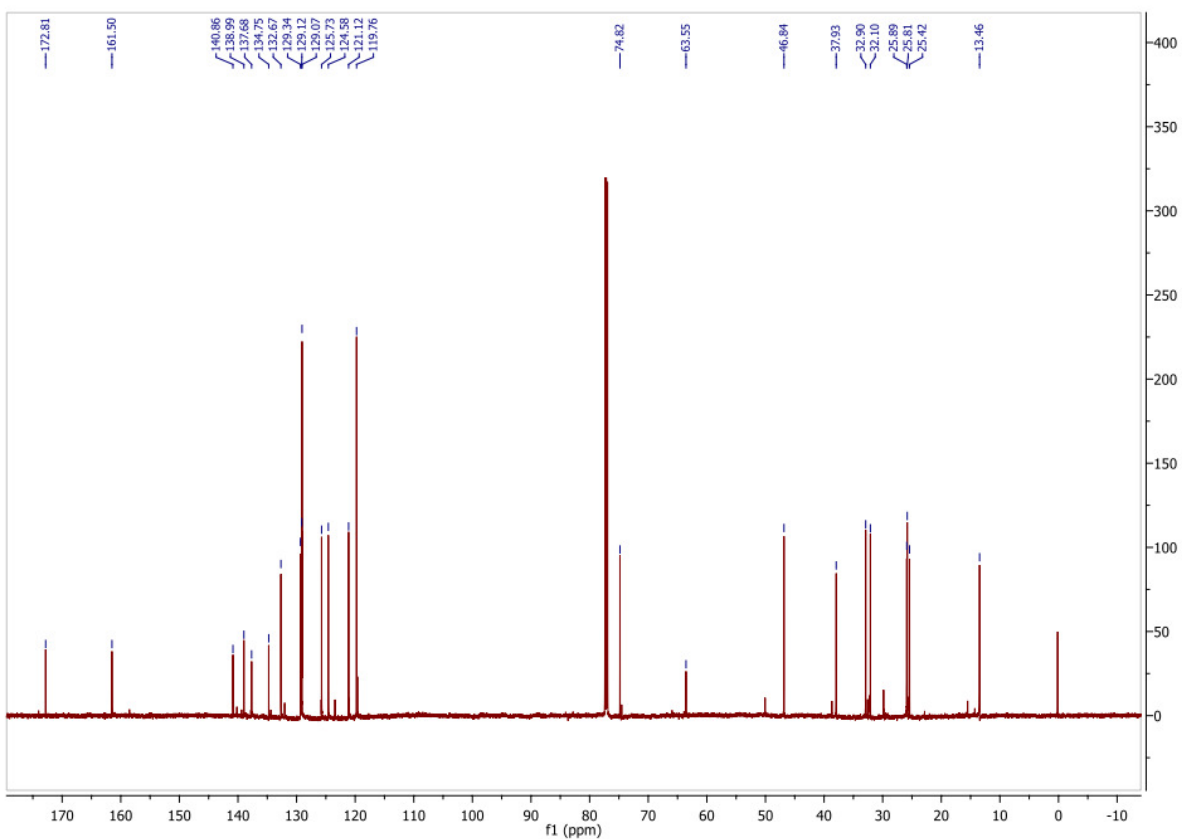

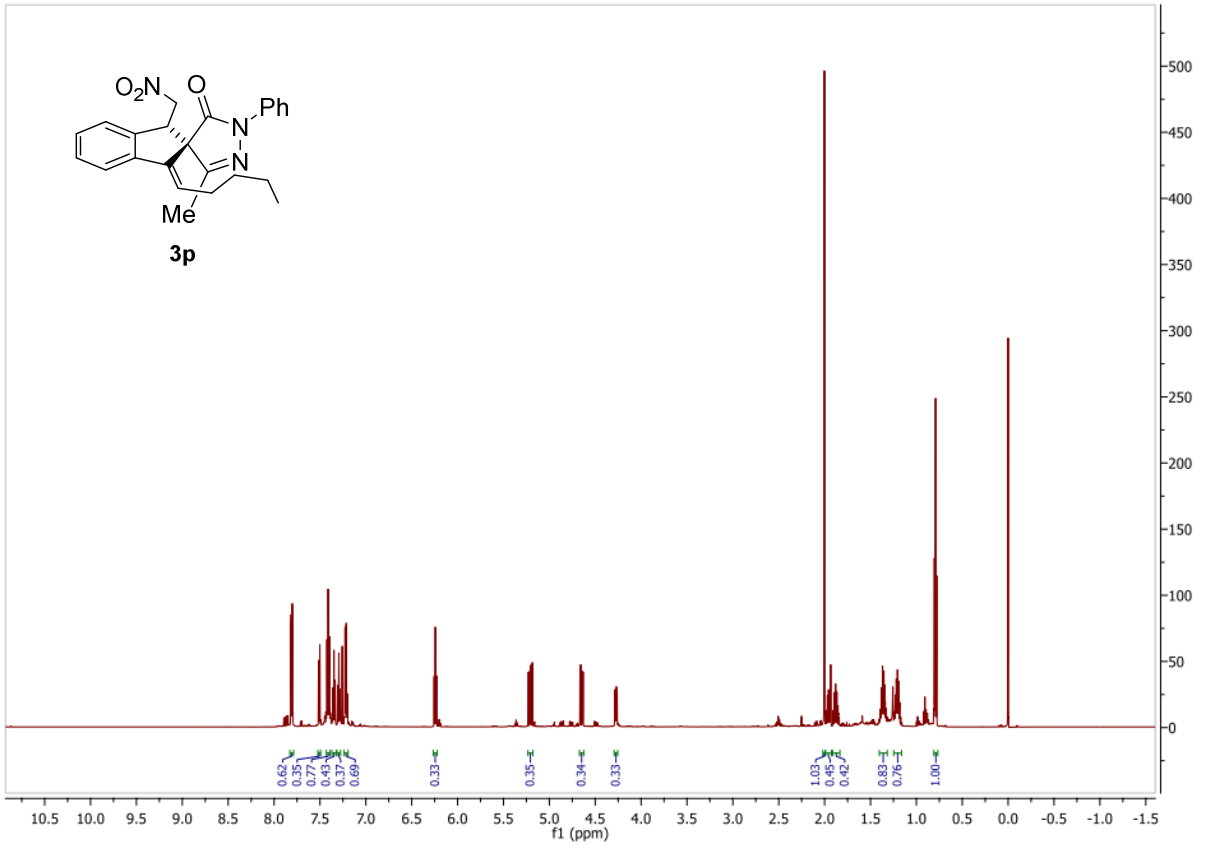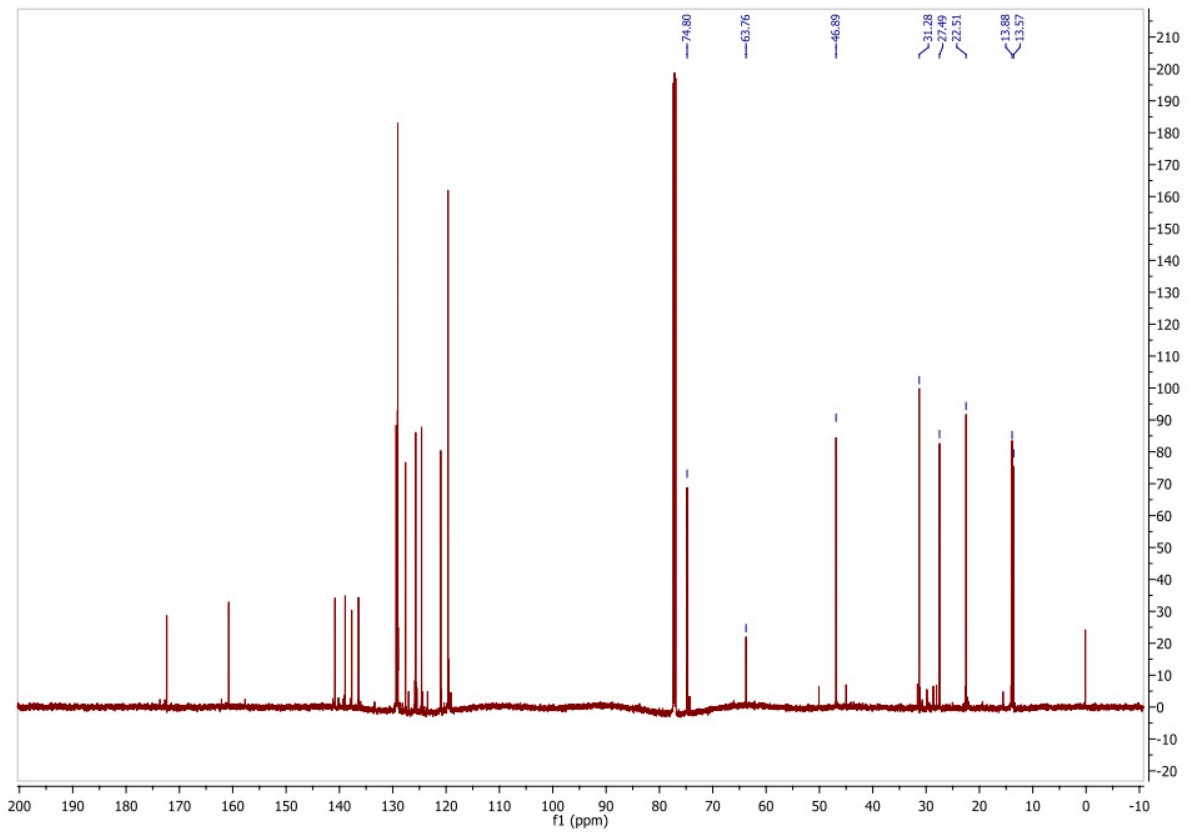

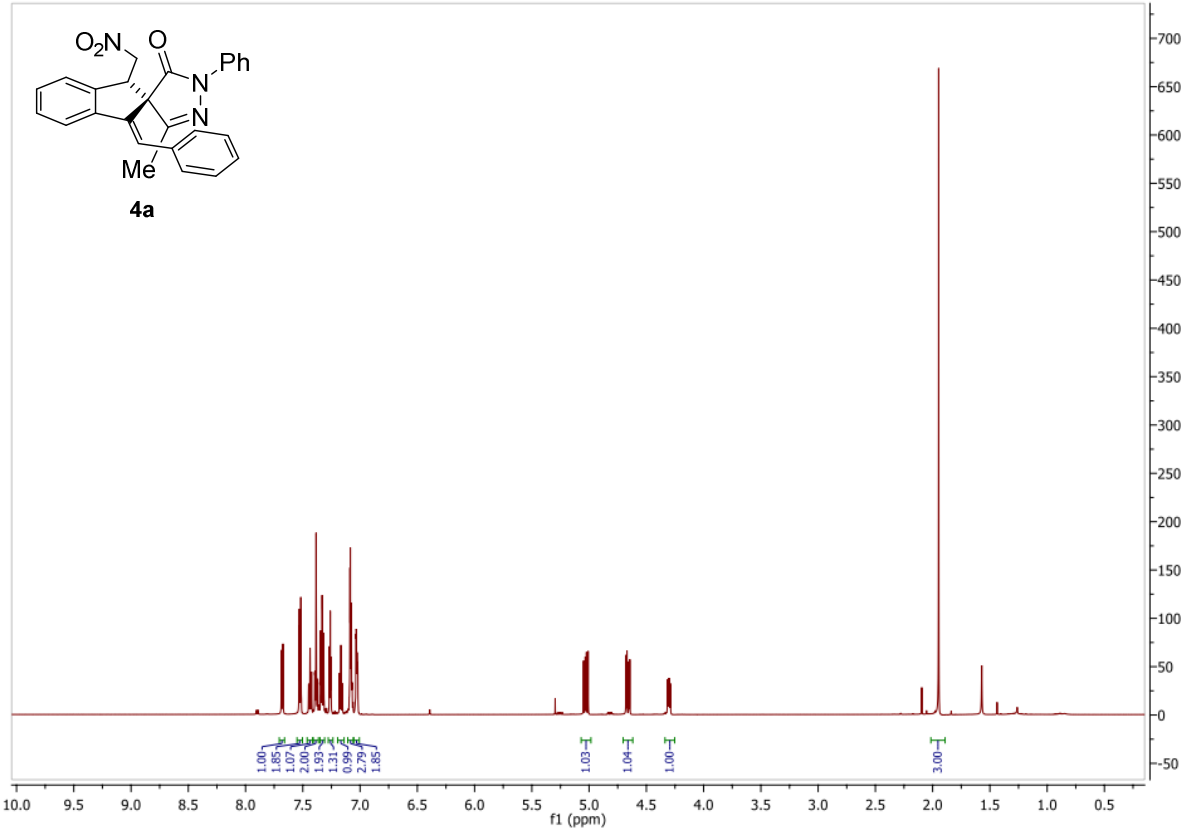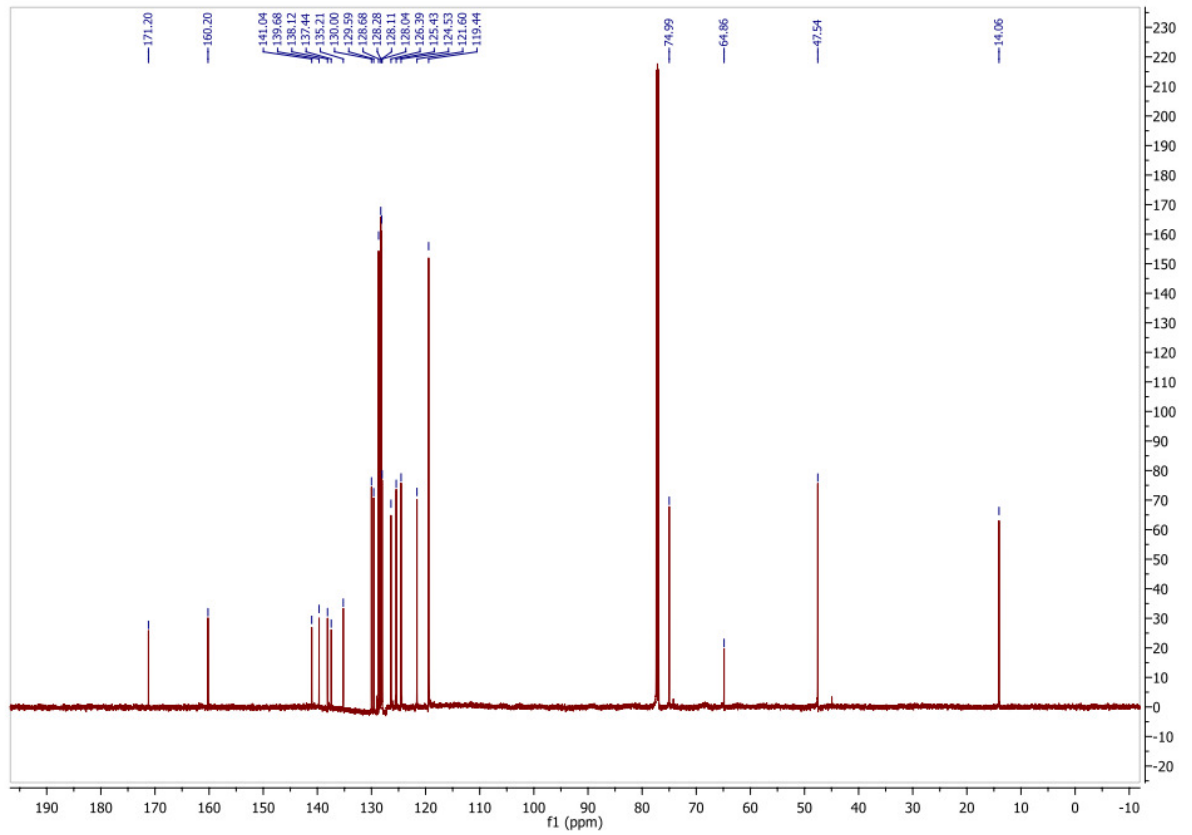

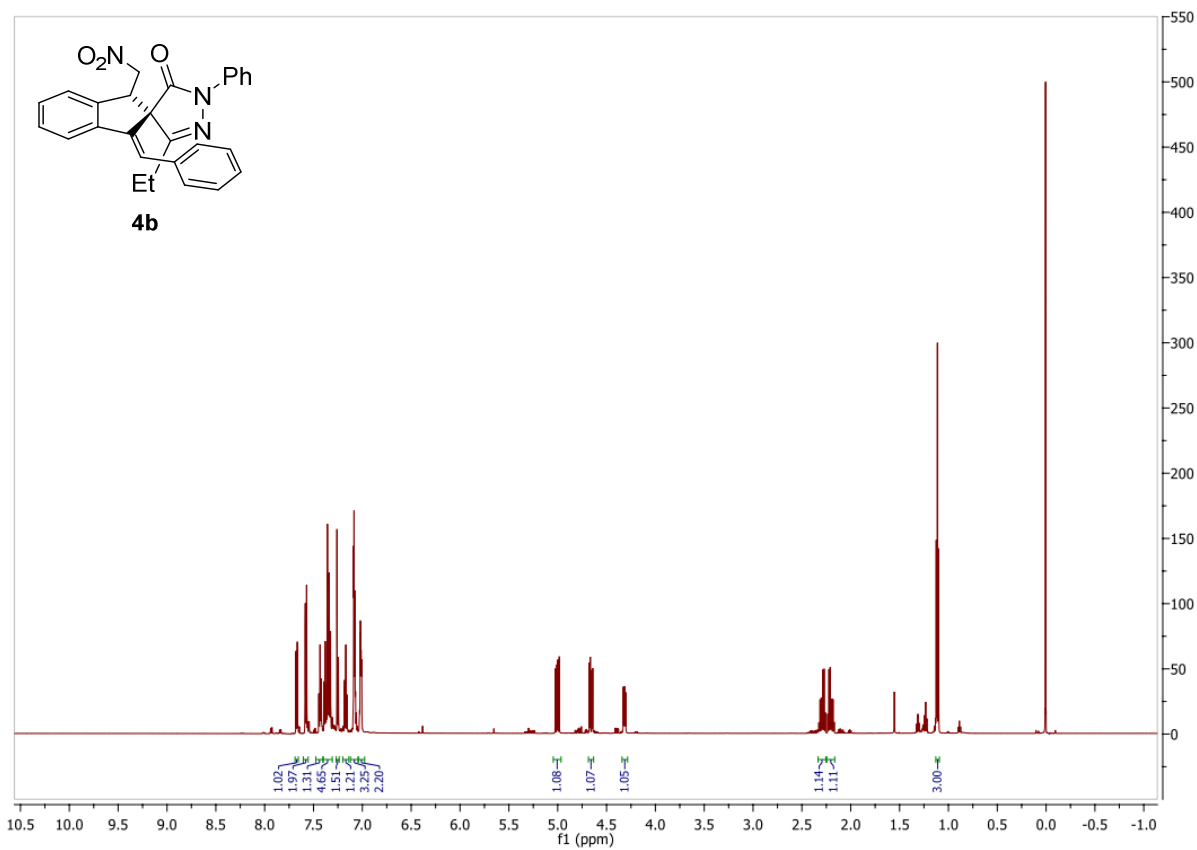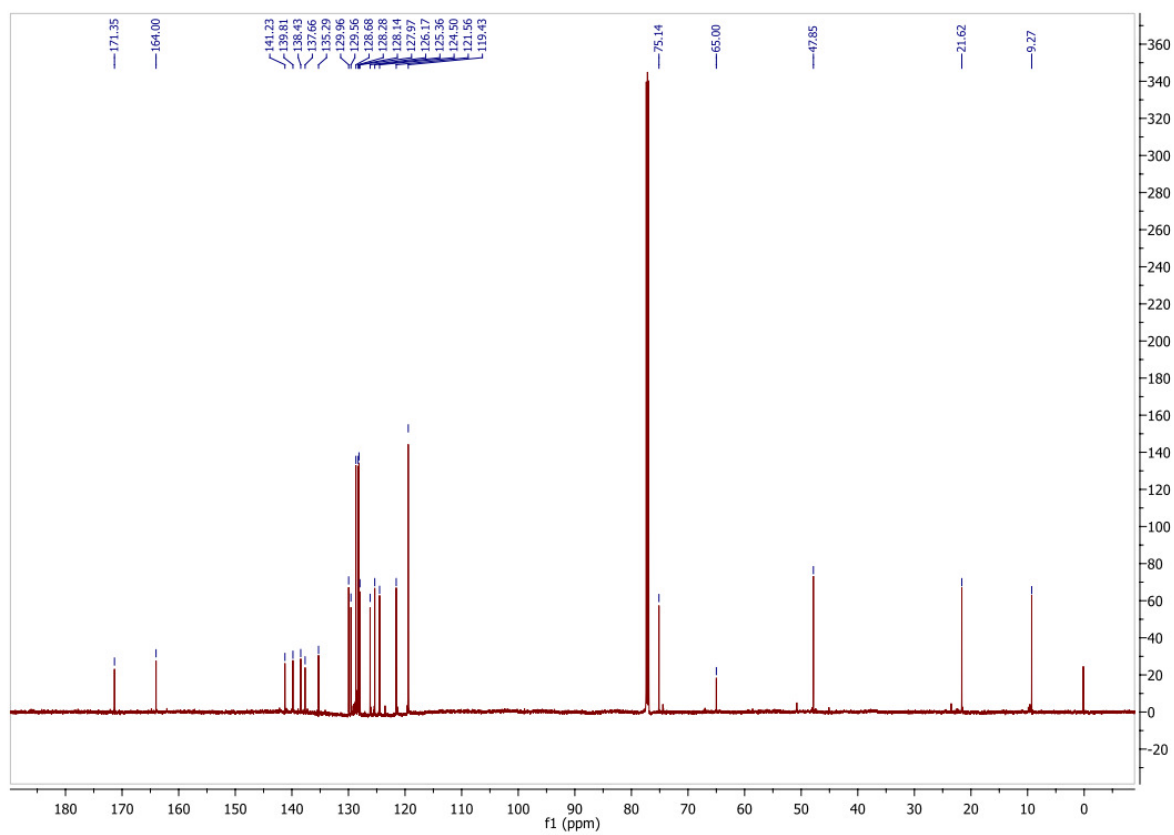

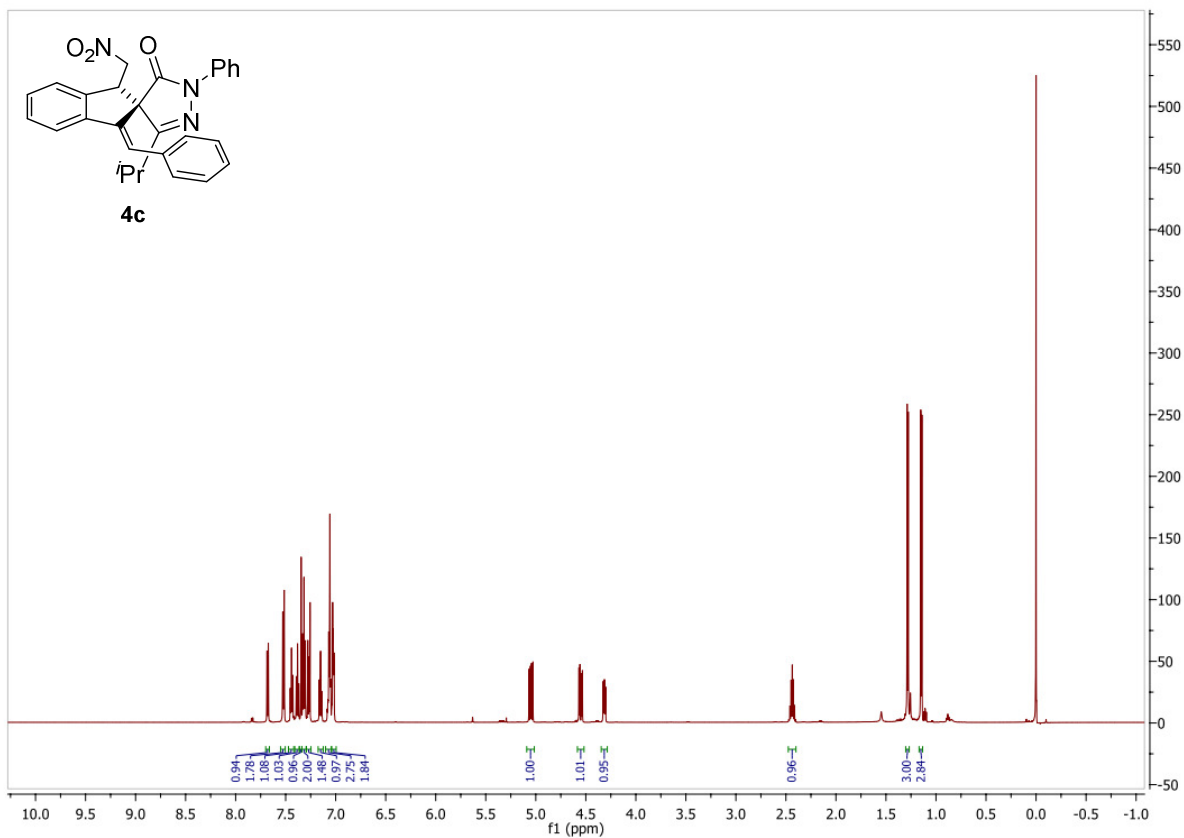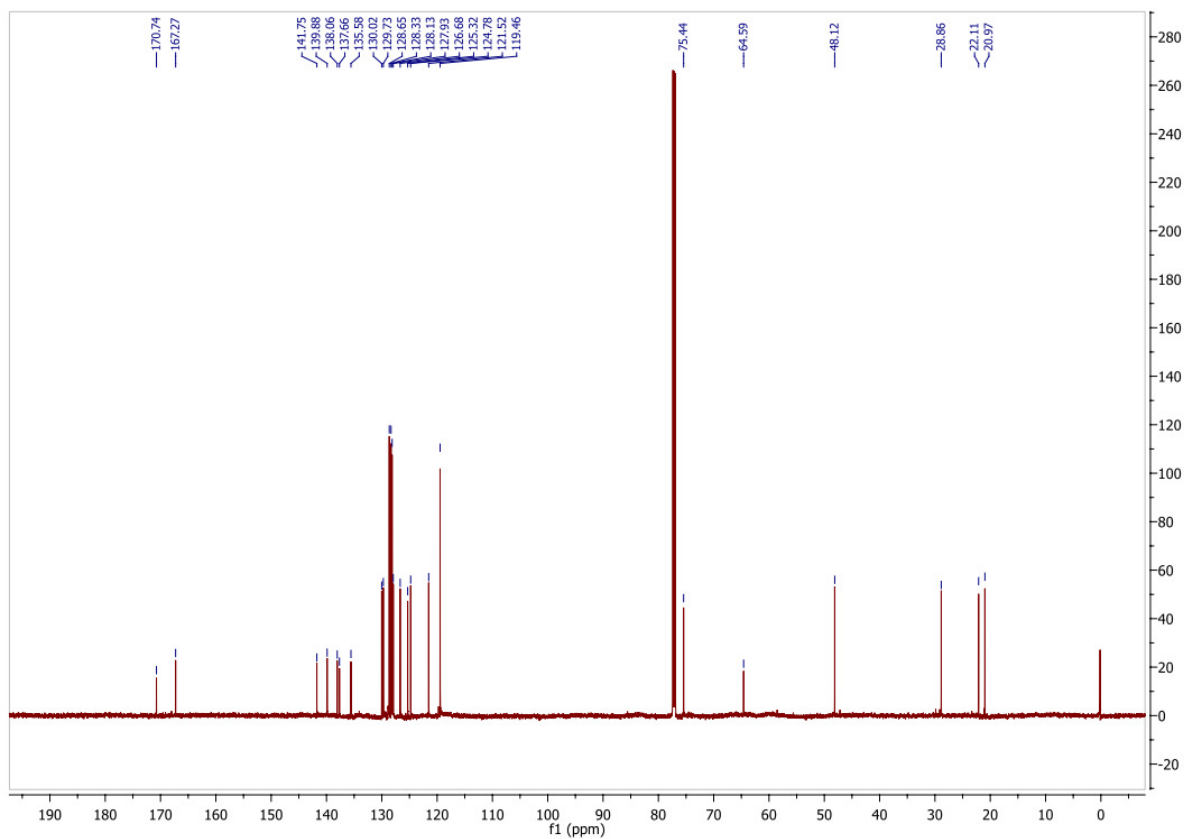

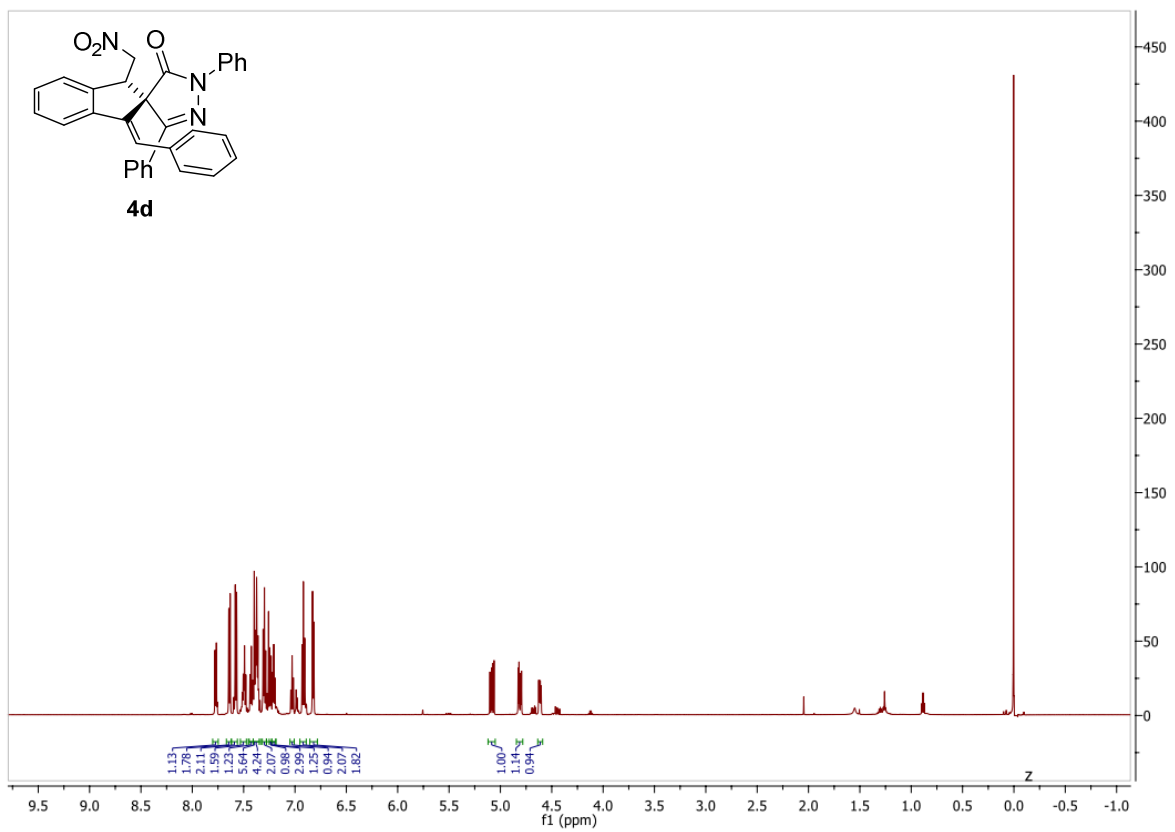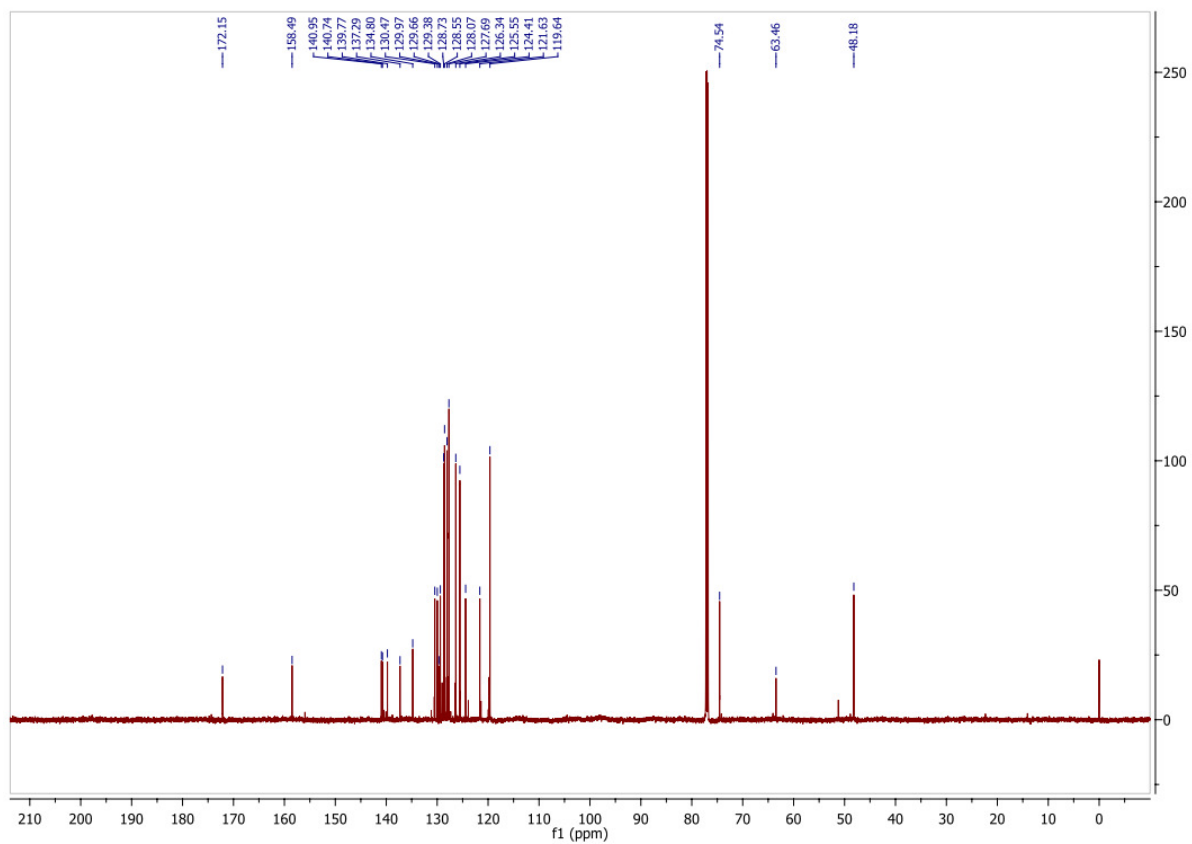

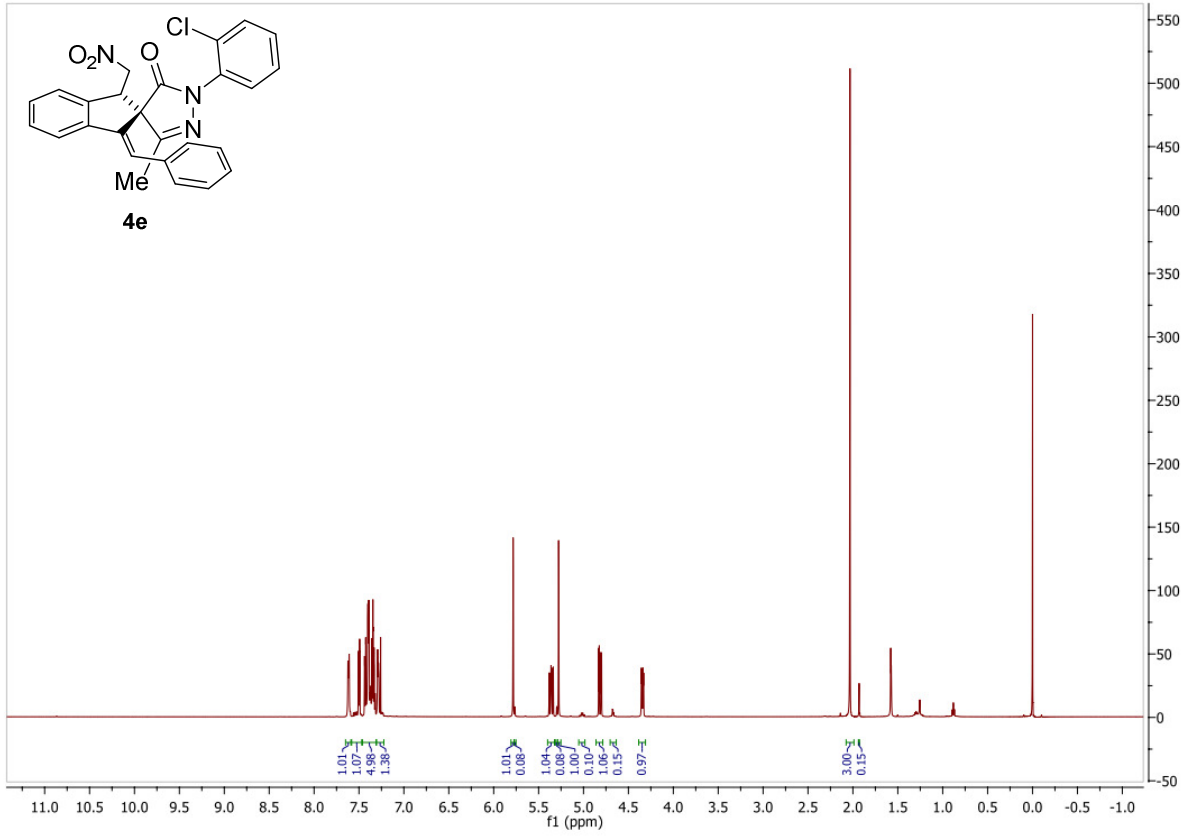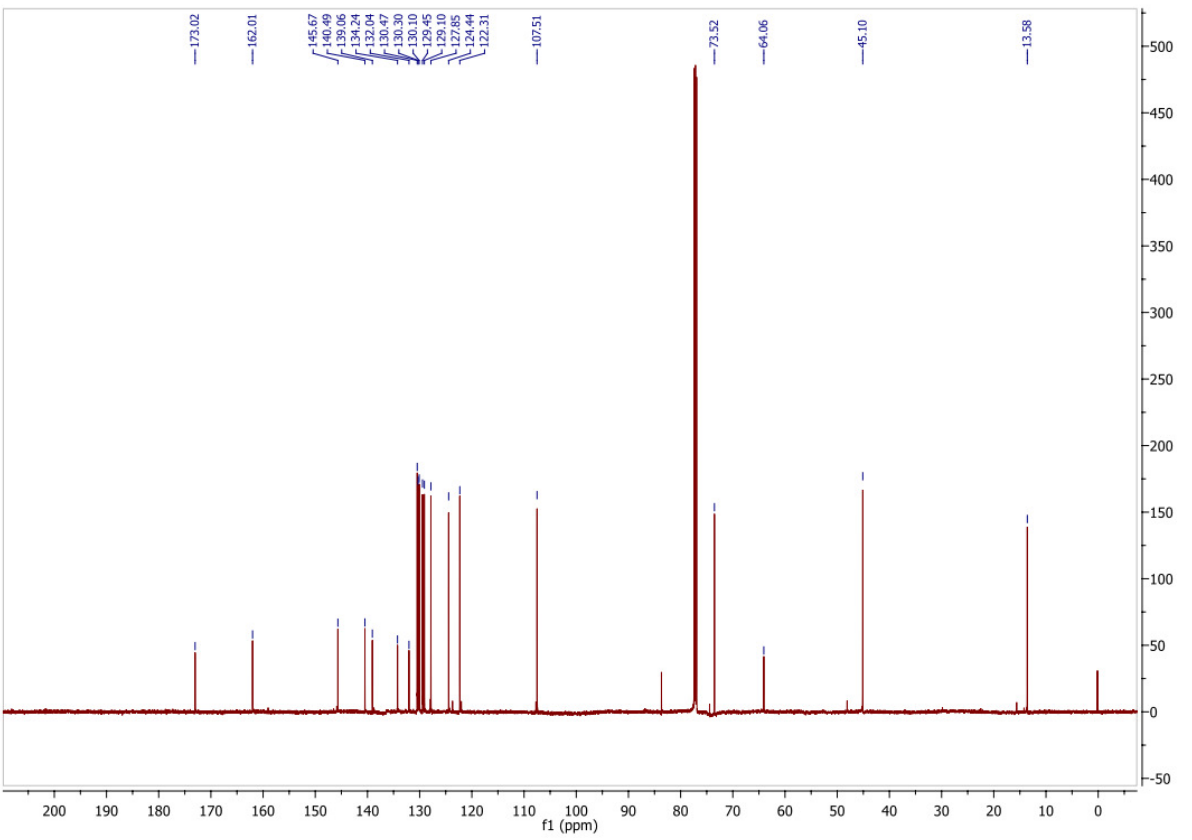

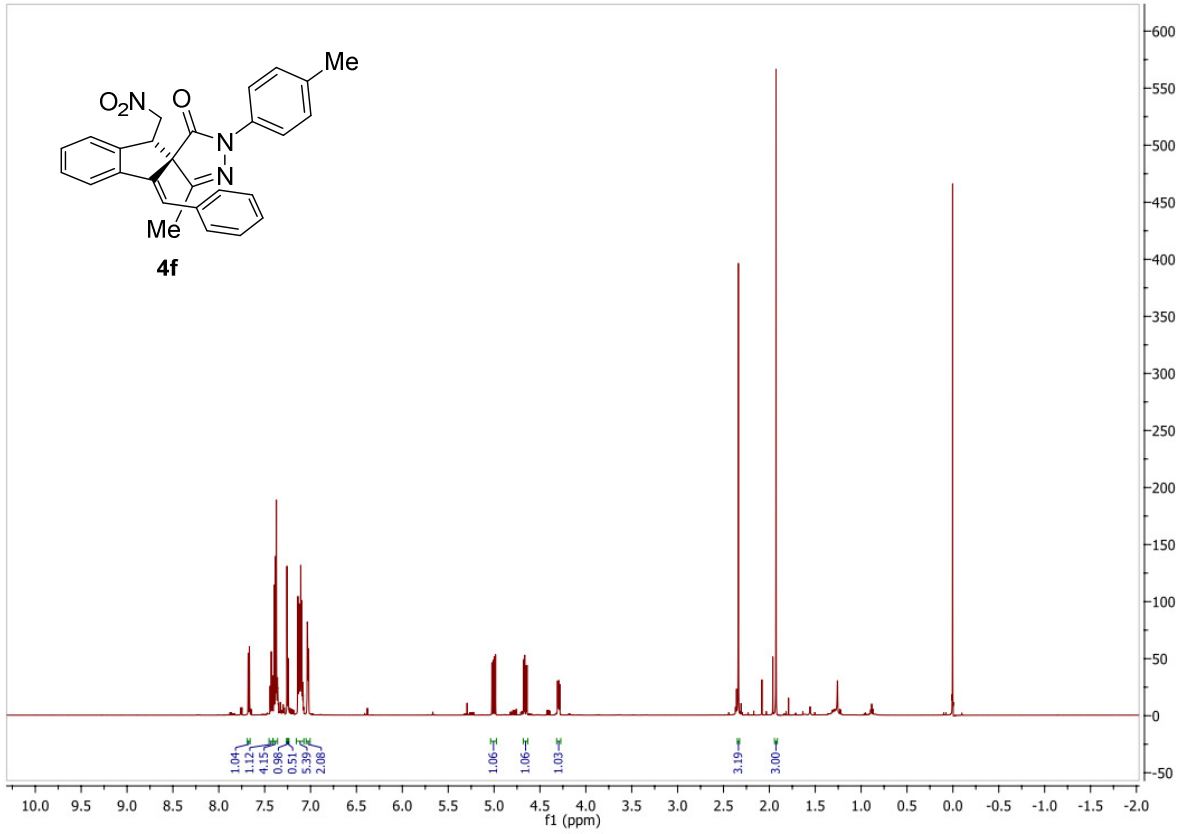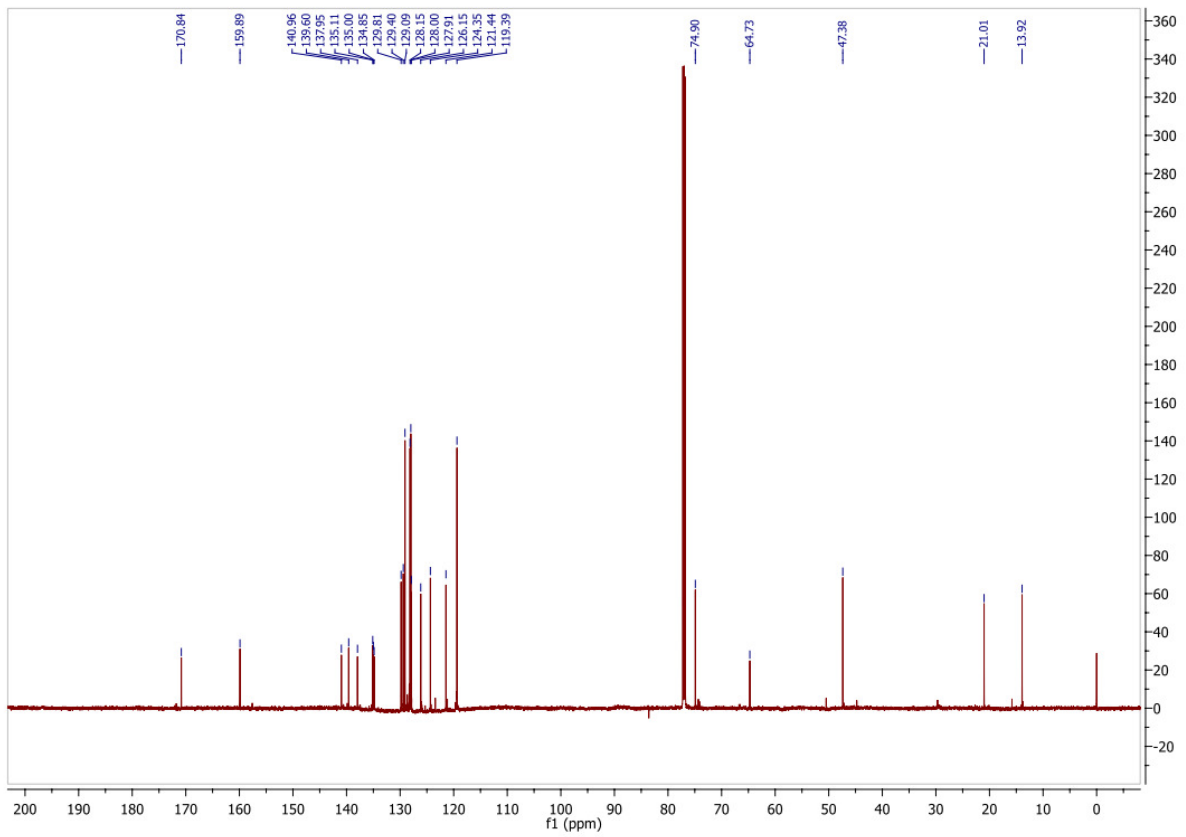



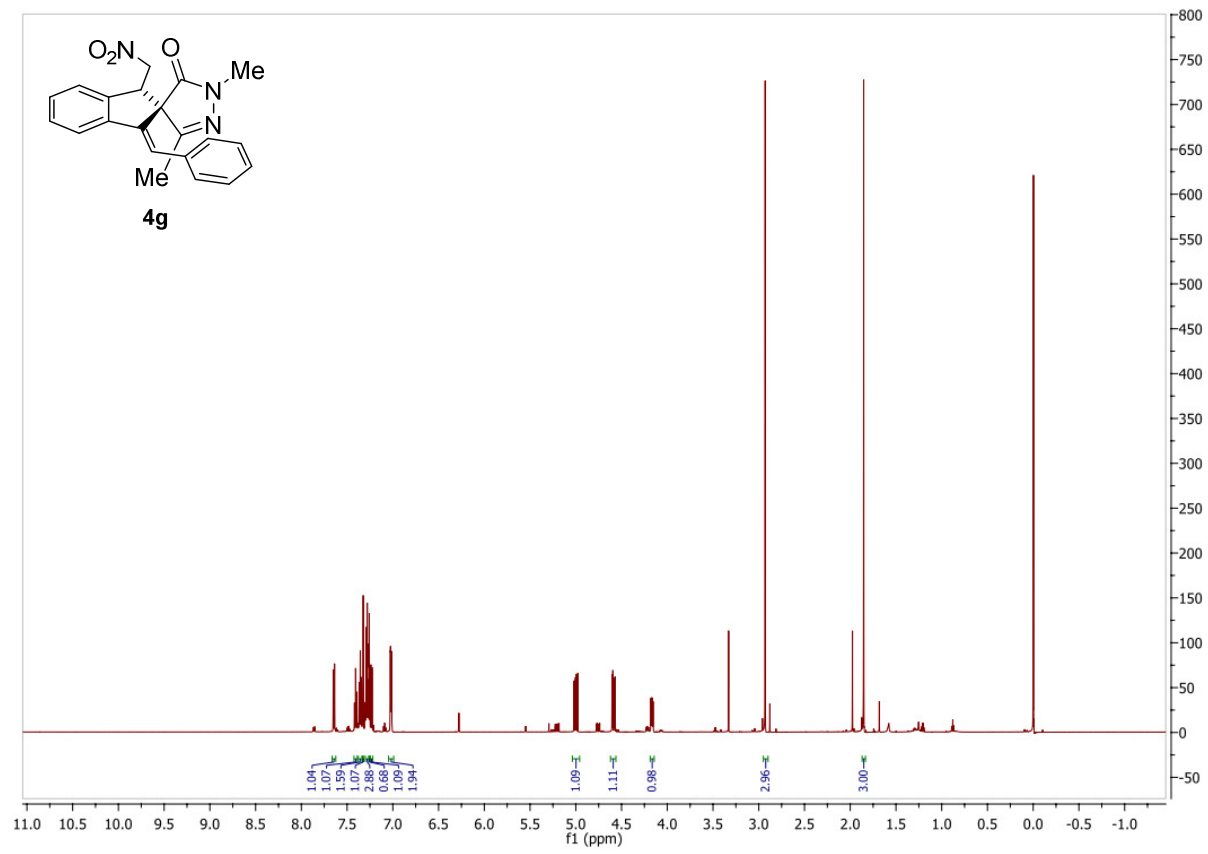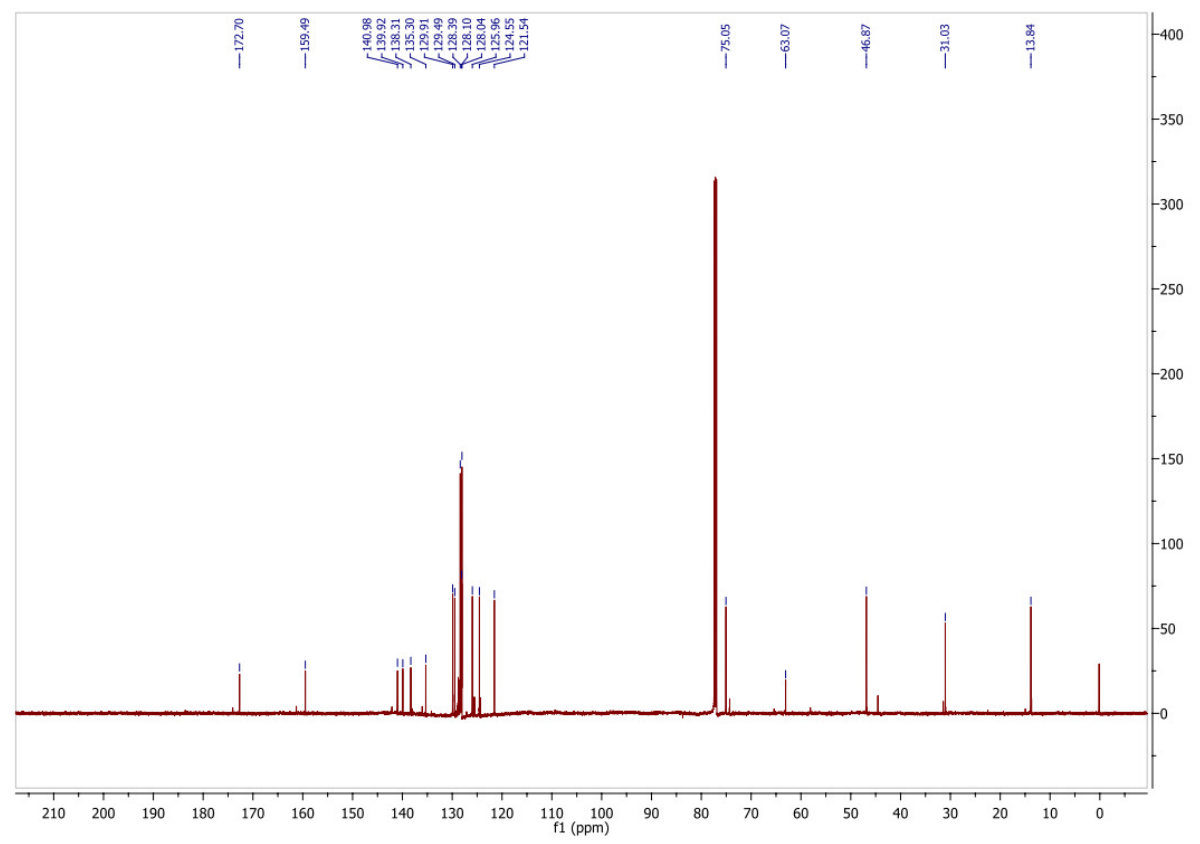

## 11.0 HPLC data

Sample Name: KD 1008 A rac  
Data file: D:\ERNIE\KD\1008AYAS.D  
Sample Info: Laufmittel: n-Heptan/iPrOH 7:3;  
Die Probe ist in DCM/LM gelöst

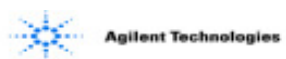

Säule: DAICELAS.M  
Säuleninfo: Chiralpak AS (250 x 4.6)mm 10µ

Operator: Analytik Labor AKEN

Injektion Time: 10:59:46  
Injektion Date: 04.12.2014

| Instrument Conditions: | At Start | At Stop |
|------------------------|----------|---------|
| Temperature in°C:      | 30.0     | 30.0    |
| Pressure in bar:       | 20.6     | 19.5    |
| Flow in ml/min:        | 0.5      | 0.5     |

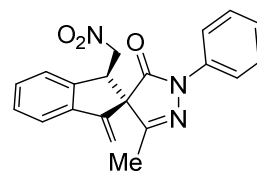

3a

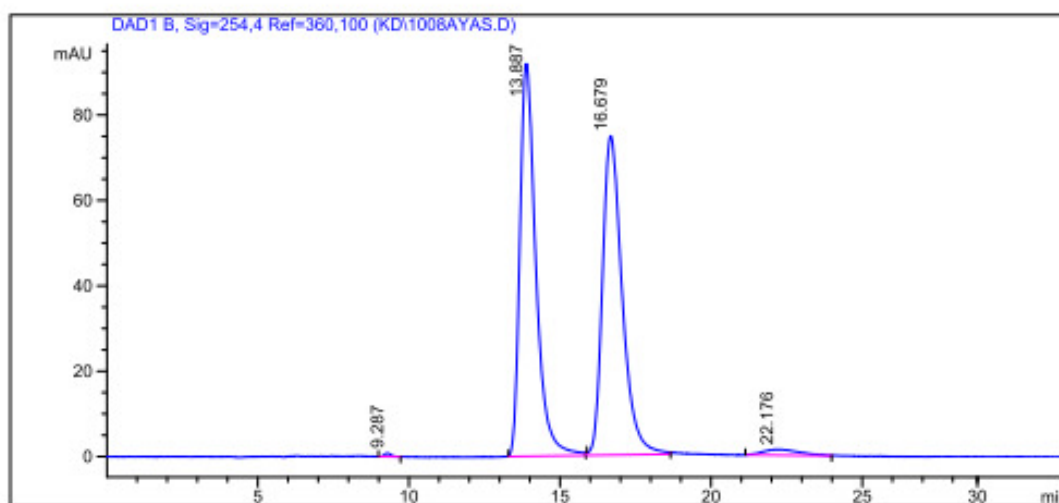

| #     | Ret. Time (min) | Width | Height (mAU) | Area (mAU*s) | Area % |
|-------|-----------------|-------|--------------|--------------|--------|
| 1     | 9.29            | 0.24  | 0.80         | 12.54        | 0.18   |
| 2     | 13.89           | 0.56  | 91.94        | 3379.78      | 48.99  |
| 3     | 16.68           | 0.70  | 74.74        | 3392.58      | 49.17  |
| 4     | 22.18           | 1.05  | 1.34         | 114.65       | 1.66   |
| Total |                 |       |              | 6899.55      | 100.00 |

Sample Name: KD 1062 J  
 Data file: D:\ERNIE\KD\1062JAS.D  
 Sample Info: Laufmittel: n-Heptan/iPrOH 7:3;  
 Die Probe ist in DCM/IM gelöst

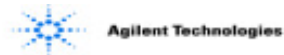

Säule: DAICELAS.M  
 Säuleninfo: Chiralpak AS (250 x 4.6)mm 10µ

Operator: Analytik Labor AKEN

Injektion Time: 13:13:27  
 Injektion Date: 25.03.2015

| Instrument Conditions: | At Start | At Stop |
|------------------------|----------|---------|
| Temperature in °C:     | 30.0     | 30.0    |
| Pressure in bar:       | 19.5     | 19.5    |
| Flow in ml/min:        | 0.5      | 0.5     |

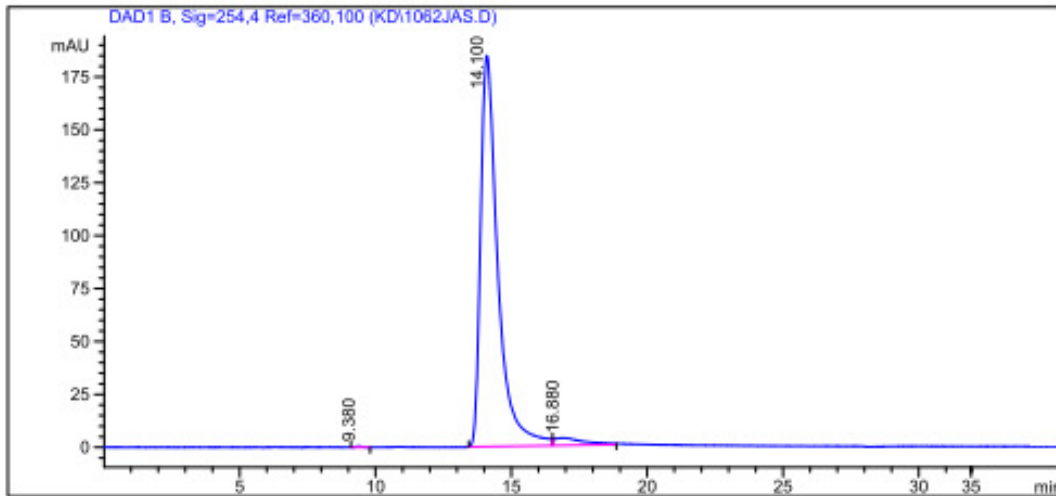

| #     | Ret. Time (min) | Width | Height (mAU) | Area (mAU*s) | Area % |
|-------|-----------------|-------|--------------|--------------|--------|
| 1     | 9.38            | 0.23  | 0.49         | 7.33         | 0.09   |
| 2     | 14.10           | 0.65  | 184.72       | 8149.16      | 96.68  |
| 3     | 16.88           | 0.92  | 3.56         | 272.92       | 3.24   |
| Total |                 |       |              | 8429.40      | 100.00 |

**Sample name:** DH LR 21 rac  
**Data file:** C:\SNOOPY\KD\DH LR 21 RAC NIA.D  
**Description:** Laufmittel: n-Heptan/EtOH 7:3 ; Die Probe ist DCM/LM gelöst.

**Injection date:** 3/27/2015 12:17:59 PM  
**Acq. Analysis method:** CHIRALPAKIARNP.M

**Column:** Chiralpak IA, (250 x 4,6) mm, 5µ, SN: IA00CE-RC036

**Pressure at start:** 42 bar      **Start flow:** 0.700 ml/min      **Column oven:** 29.99 °C

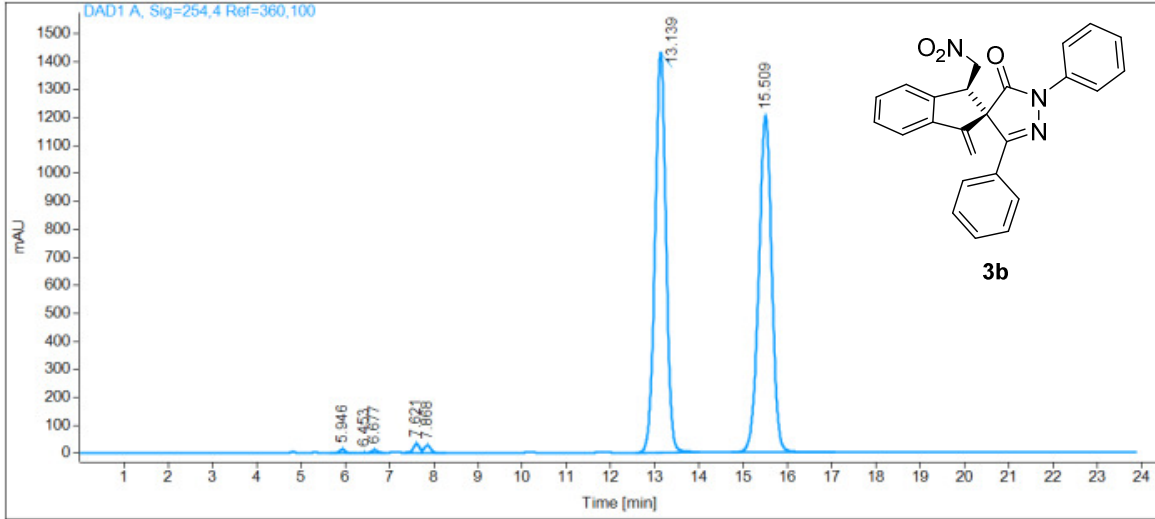

| Name | DH LR 21 rac |      |        |          |         |             |
|------|--------------|------|--------|----------|---------|-------------|
|      | RT [min]     | Type | Area%  | Area     | Height  | Width [min] |
|      | 5.95         | VB   | 0.21   | 107.20   | 12.99   | 0.13        |
|      | 6.45         | BV   | 0.01   | 6.34     | 1.00    | 0.10        |
|      | 6.68         | VB   | 0.19   | 96.32    | 10.23   | 0.15        |
|      | 7.62         | BV   | 0.64   | 318.11   | 31.85   | 0.15        |
|      | 7.87         | VB   | 0.56   | 278.37   | 26.90   | 0.16        |
|      | 13.14        | BB   | 49.21  | 24554.32 | 1429.01 | 0.26        |
|      | 15.51        | BB   | 49.17  | 24533.71 | 1201.76 | 0.31        |
|      | Sum          |      | 100.00 | 49894.37 |         |             |

**Sample name:** KD 1068 A  
**Data file:** C:\SNOOPY\KD\KD 1068 A IA.D  
**Description:** Laufmittel: n-Heptan/EtOH 7:3 ; Die Probe ist DCM/LM gelöst.

**Injection date:** 3/27/2015 11:48:15 AM  
**Acq. Analysis method:** CHIRALPAKIARNP.M

**Column:** Chiralpak IA, (250 x 4,6) mm, 5 $\mu$ , SN: IA00CE-RC036

**Pressure at start:** 42 bar      **Start flow:** 0.700 ml/min      **Column oven:** 29.97 °C

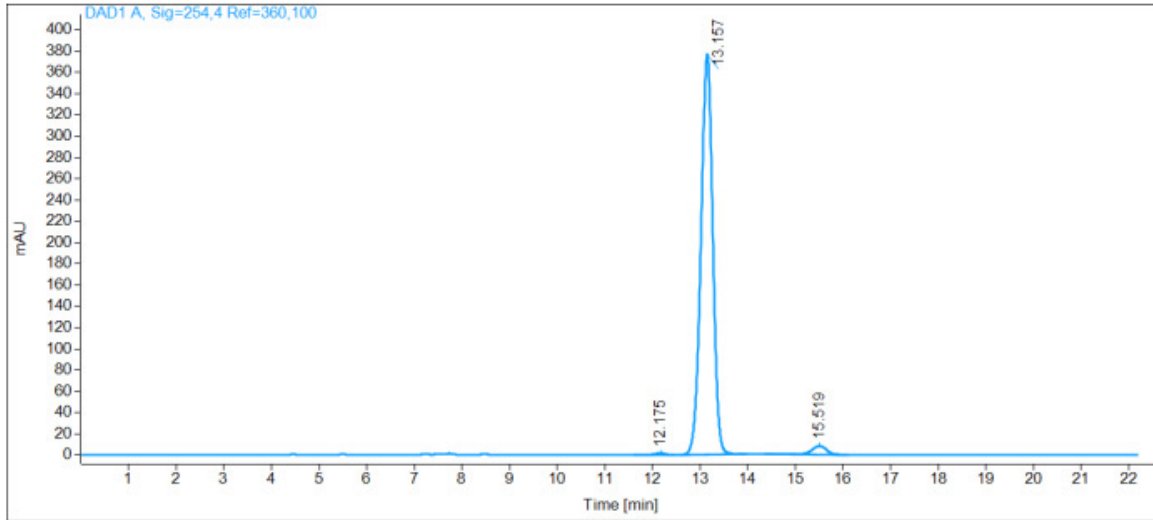

| Name | RT [min] | Type | Area%  | Area    | Height | Width [min] |
|------|----------|------|--------|---------|--------|-------------|
|      | 12.18    | BB   | 0.39   | 26.00   | 1.76   | 0.23        |
|      | 13.16    | BB   | 97.04  | 6457.11 | 376.63 | 0.26        |
|      | 15.52    | BB   | 2.57   | 170.75  | 8.04   | 0.32        |
|      | Sum      |      | 100.00 | 6653.86 |        |             |

**Sample name:** DH LR 30 rac  
**Data file:** C:\SNOOPY\DH\LR30RIA.D  
**Description:** Laufmittel: n-Heptan/EtOH 7:3;  
 Probe ist in DCM/LM gelöst.  
**Injection date:** 1/8/2015 3:21:58 PM  
**Acq. Analysis method:** CHIRALPAKIARNP.M

**Column:** Chiralpak IA, (250 x 4,6) mm, 5µ, SN: IA00CE-RC036

**Pressure at start:** 41 bar      **Start flow:** 0.700 ml/min      **Column oven:** 29.98 °C

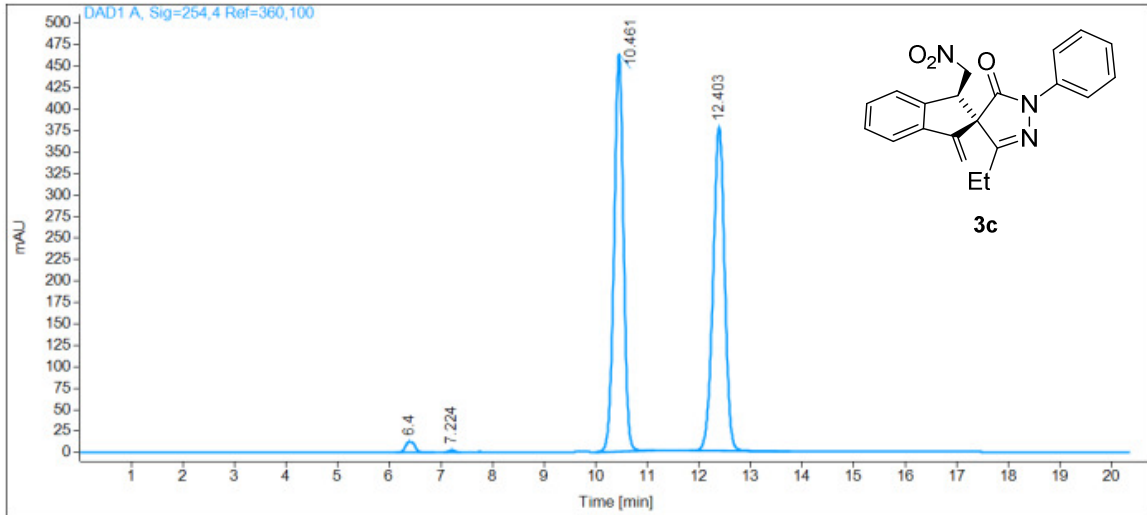

| Name     | DH LR 30 rac |        |          |        |             |  |
|----------|--------------|--------|----------|--------|-------------|--|
| RT [min] | Type         | Area%  | Area     | Height | Width [min] |  |
| 6.40     | BB           | 1.26   | 150.71   | 11.87  | 0.20        |  |
| 7.22     | BB           | 0.15   | 18.52    | 2.51   | 0.12        |  |
| 10.46    | BB           | 49.32  | 5896.54  | 463.37 | 0.20        |  |
| 12.40    | BB           | 49.26  | 5889.45  | 377.74 | 0.24        |  |
|          | Sum          | 100.00 | 11955.22 |        |             |  |

**Sample name:** KD 1067 A  
**Data file:** C:\SNOOPY\KD\KD 1067 A IA.D  
**Description:** Laufmittel: n-Heptan/EtOH 7:3 ; Die Probe ist DCM/LM gelöst.

**Injection date:** 4/1/2015 1:59:54 PM  
**Acq. Analysis method:** CHIRALPAKIARNP.M

**Column:** Chiralpak IA, (250 x 4,6) mm, 5µ, SN: IA00CE-RC036

**Pressure at start:** 41 bar      **Start flow:** 0.700 ml/min      **Column oven:** 30 °C

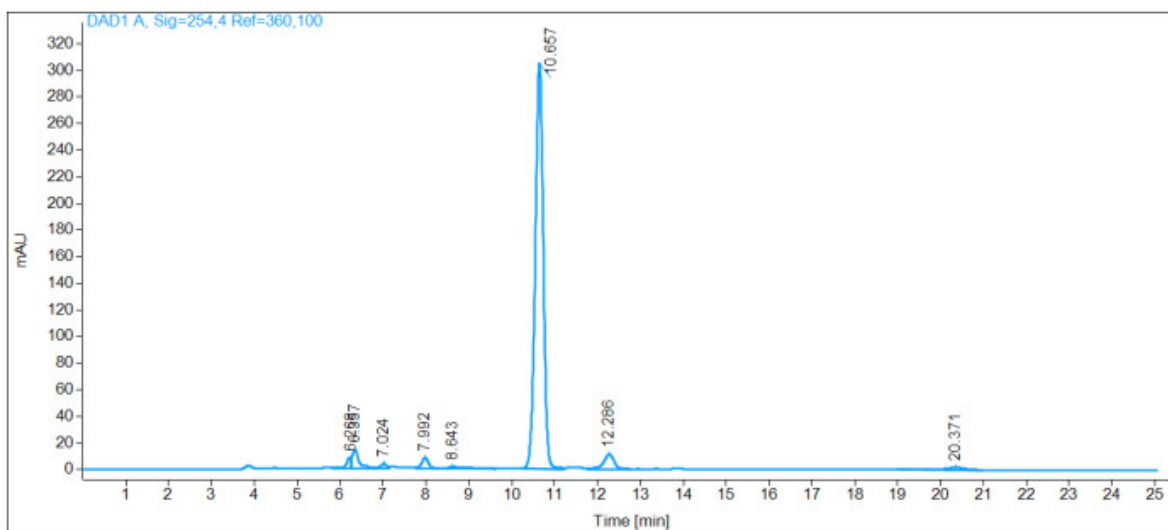

| Name     |      | KD 1067 A |         |        |             |
|----------|------|-----------|---------|--------|-------------|
| RT [min] | Type | Area%     | Area    | Height | Width [min] |
| 6.27     | MF   | 1.57      | 72.08   | 8.28   | 0.14        |
| 6.36     | FM   | 3.27      | 149.77  | 14.47  | 0.17        |
| 7.02     | VV   | 0.68      | 31.32   | 3.14   | 0.15        |
| 7.99     | VB   | 1.82      | 83.53   | 8.01   | 0.16        |
| 8.64     | BB   | 0.86      | 39.54   | 1.53   | 0.34        |
| 10.66    | BV   | 86.38     | 3955.41 | 304.87 | 0.20        |
| 12.29    | VB   | 4.03      | 184.44  | 11.08  | 0.25        |
| 20.37    | BB   | 1.38      | 63.26   | 1.81   | 0.52        |
| Sum      |      | 100.00    | 4579.33 |        |             |

**Sample name:** DH LR 32 rac  
**Data file:** C:\SNOOPY\DH LR 32 RAC IC.D  
**Description:** Laufmittel: n-Heptan/EtOH 97:3; Die Probe ist DCM/LM gelöst.

**Injection date:** 1/8/2015 8:55:16 AM  
**Acq. Analysis method:** CHIRALPAKIC1-6LNP.M

**Column:** Chiralpak IC, (150 x 4,6) mm, 5µ, SN: IC00CD-QF015

**Pressure at start:** 31 bar      **Start flow:** 1.000 ml/min      **Column oven:** 29.98 °C

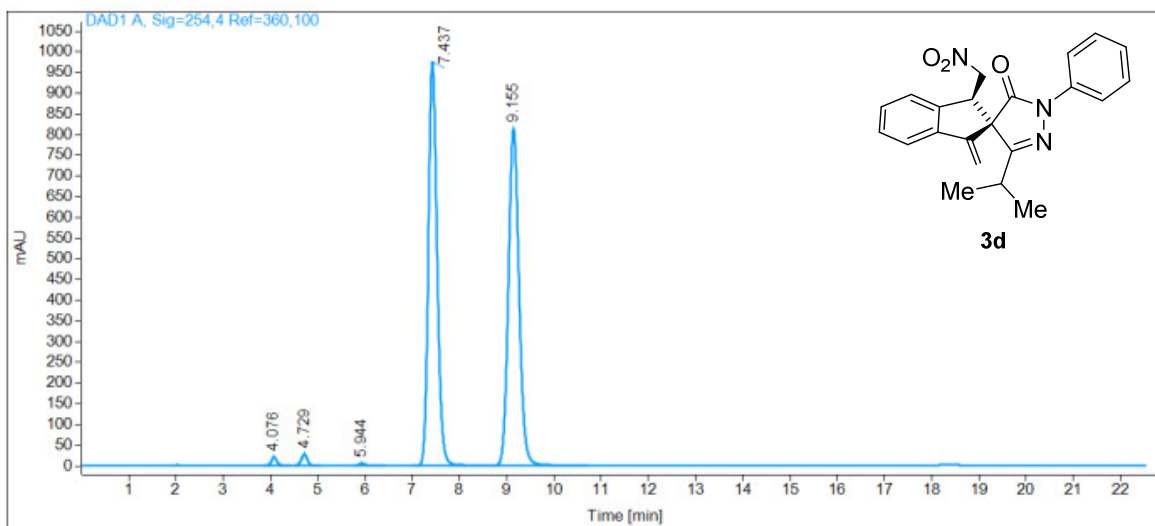

| Name     | DH LR 32 rac |        |          |        |             |
|----------|--------------|--------|----------|--------|-------------|
| RT [min] | Type         | Area%  | Area     | Height | Width [min] |
| 4.08     | BB           | 0.62   | 159.66   | 21.17  | 0.11        |
| 4.73     | BB           | 0.91   | 233.72   | 26.74  | 0.14        |
| 5.94     | BB           | 0.17   | 44.78    | 5.41   | 0.13        |
| 7.44     | BB           | 49.08  | 12594.48 | 974.89 | 0.20        |
| 9.15     | BB           | 49.22  | 12630.33 | 813.79 | 0.24        |
|          | Sum          | 100.00 | 25662.98 |        |             |



**Sample name:** KD 1116 A  
**Data file:** C:\SNOOPY\KD\1116AIC.D  
**Description:** Laufmittel: n-Heptan/ETOH 97:3;  
 Probe ist in LM/DCM gelöst  
**Injection date:** 5/8/2015 1:54:08 PM  
**Acq. Analysis method:** CHIRALPAKIC1-6LNP.M  
**Column:** Chiralpak IC, (150 x 4,6) mm, 5µ, SN: IC00CD-QF015

**Pressure at start:** 35 bar      **Start flow:** 1.000 ml/min      **Column oven:** 29.99 °C

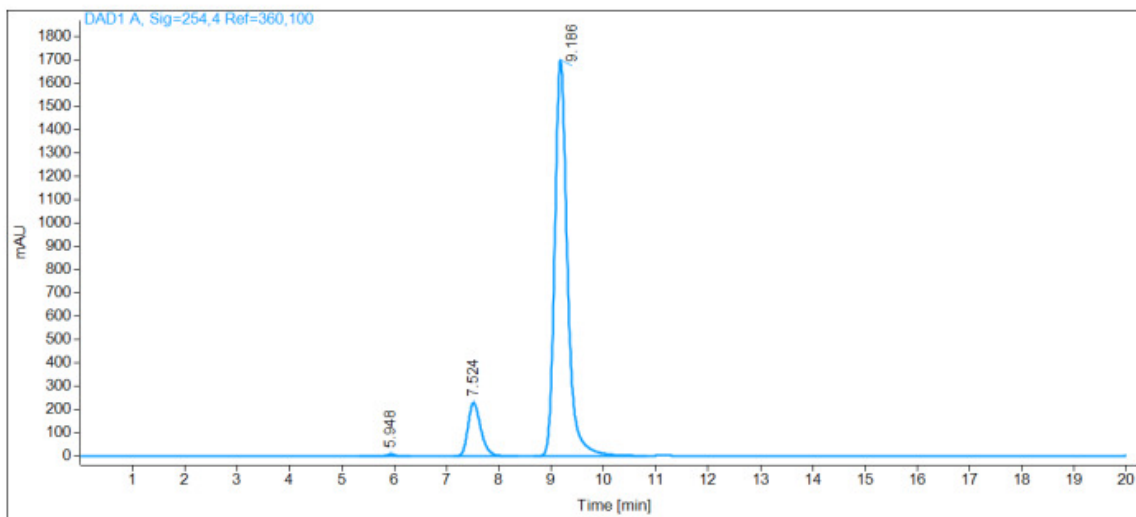

| Name     |      | KD 1116 A |          |         |             |  |
|----------|------|-----------|----------|---------|-------------|--|
| RT [min] | Type | Area%     | Area     | Height  | Width [min] |  |
| 5.95     | BV   | 0.29      | 95.67    | 9.24    | 0.15        |  |
| 7.52     | BB   | 11.84     | 3866.95  | 228.17  | 0.26        |  |
| 9.19     | BV   | 87.87     | 28706.98 | 1697.70 | 0.26        |  |
|          | Sum  | 100.00    | 32669.61 |         |             |  |

**Sample name:** KD 1031 A rac  
**Data file:** C:\SNOOPY\KD\KD 1031 A RAC IC.D  
**Description:** Laufmittel: n-Heptan/EtOH 7:3; Die Probe ist DCM/LM gelöst.  
**Injection date:** 1/7/2015 9:14:35 AM  
**Acq. Analysis method:** CHIRALPAKIC1-6LNP.M  
**Column:** Chiralpak IC, (150 x 4,6) mm, 5µ, SN: IC00CD-QF015

**Pressure at start:** 21 bar      **Start flow:** 0.500 ml/min      **Column oven:** 29.99 °C

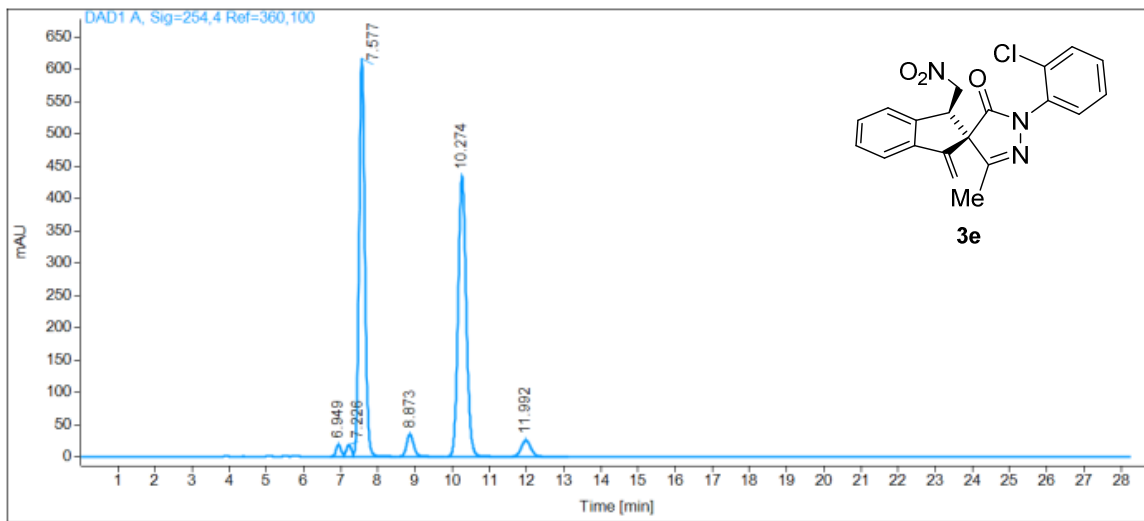

| Name     |      | KD 1031 A rac |          |        |             |  |
|----------|------|---------------|----------|--------|-------------|--|
| RT [min] | Type | Area%         | Area     | Height | Width [min] |  |
| 6.95     | BV   | 1.19          | 171.69   | 18.89  | 0.15        |  |
| 7.23     | VV   | 1.19          | 171.10   | 18.40  | 0.14        |  |
| 7.58     | VB   | 45.69         | 6577.14  | 614.28 | 0.16        |  |
| 8.87     | BB   | 3.17          | 457.02   | 34.44  | 0.21        |  |
| 10.27    | BV   | 45.59         | 6562.28  | 433.79 | 0.24        |  |
| 11.99    | VB   | 3.16          | 454.97   | 25.11  | 0.28        |  |
| Sum      |      | 100.00        | 14394.19 |        |             |  |

**Sample name:** KD 1096 A  
**Data file:** C:\SNOOPY\KD\KD 1096 A IC.D  
**Description:** Laufmittel: n-Heptan/EtOH 7:3 ; Die Probe ist DCM/LM gelöst.

**Injection date:** 4/20/2015 2:15:29 PM  
**Acq. Analysis method:** CHIRALPAKIC1-6LNP.M

**Column:** Chiralpak IC, (150 x 4,6) mm, 5µ, SN: IC00CD-QF015

**Pressure at start:** 23 bar      **Start flow:** 0.500 ml/min      **Column oven:** 29.99 °C

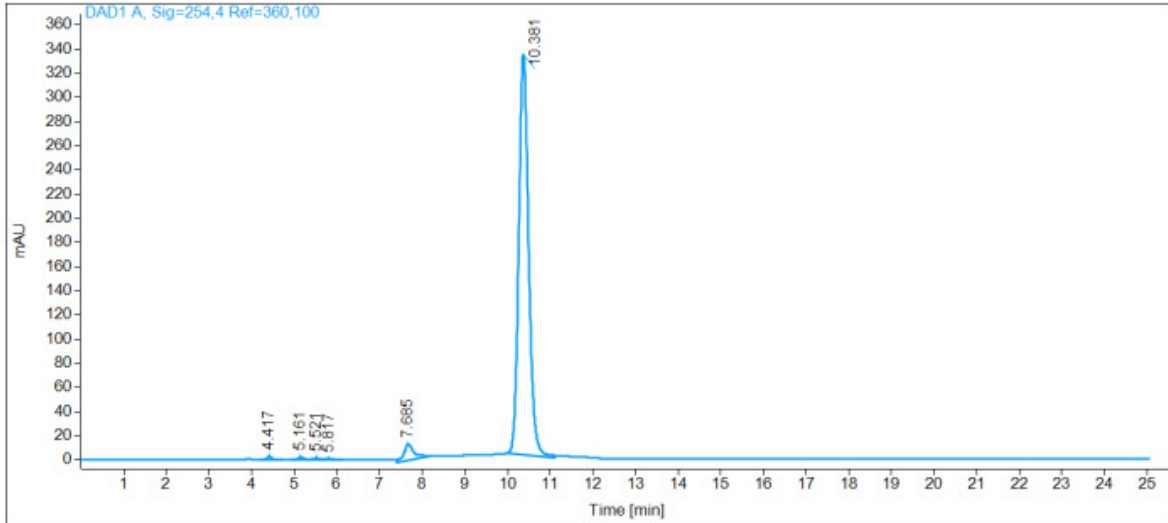

| Name     | KD 1096 A |        | Area%   | Area   | Height | Width [min] |
|----------|-----------|--------|---------|--------|--------|-------------|
| RT [min] | Type      |        |         |        |        |             |
| 4.42     | VV        | 0.37   | 20.87   | 2.79   | 0.11   |             |
| 5.16     | VV        | 0.29   | 16.42   | 1.95   | 0.12   |             |
| 5.52     | VV        | 0.18   | 10.07   | 1.08   | 0.14   |             |
| 5.82     | VB        | 0.13   | 7.17    | 0.75   | 0.14   |             |
| 7.68     | MM        | 4.09   | 229.56  | 13.53  | 0.28   |             |
| 10.38    | MM        | 94.94  | 5328.09 | 331.41 | 0.27   |             |
|          | Sum       | 100.00 | 5612.18 |        |        |             |



**Sample name:** KD 1038 A rac  
**Data file:** C:\SNOOPY\KD\1038AR1IC.D  
**Description:** Laufmittel: n-Heptan/EtOH 9:1;  
 Probe ist in LM/DCM gelöst  
**Injection date:** 1/7/2015 11:06:20 AM  
**Acq. Analysis method:** CHIRALPAKIC1-6LNP.M  
**Column:** Chiralpak IC, (150 x 4,6) mm, 5µ, SN: IC00CD-QF015

**Pressure at start:** 33 bar      **Start flow:** 1.000 ml/min      **Column oven:** 30.01 °C

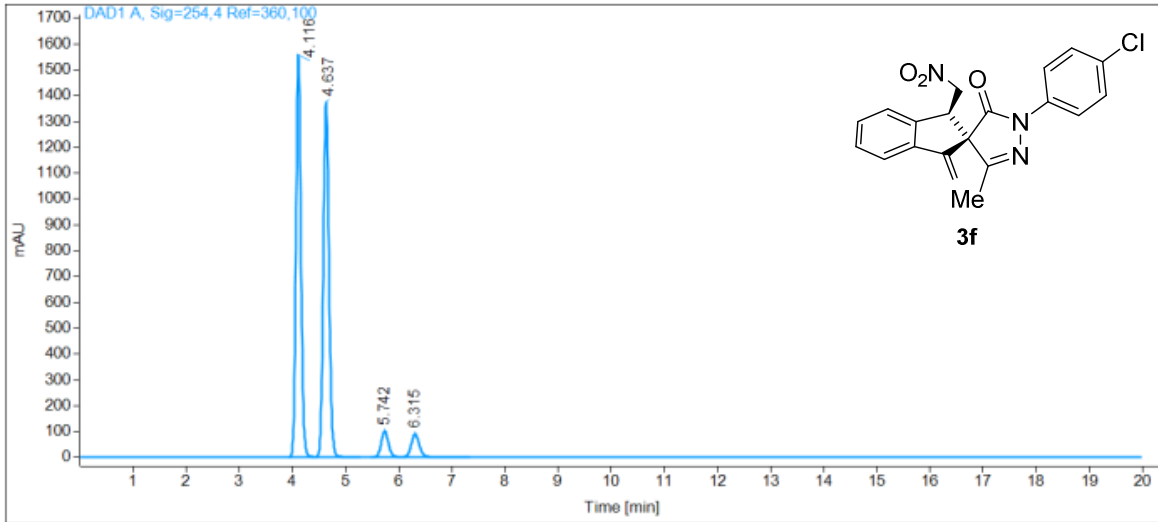

| Name     | KD 1038 A rac |        |          |         |             |  |
|----------|---------------|--------|----------|---------|-------------|--|
| RT [min] | Type          | Area%  | Area     | Height  | Width [min] |  |
| 4.12     | VB            | 45.69  | 10092.69 | 1556.43 | 0.10        |  |
| 4.64     | BB            | 45.81  | 10119.11 | 1374.11 | 0.11        |  |
| 5.74     | BV            | 4.24   | 936.74   | 99.91   | 0.15        |  |
| 6.32     | VB            | 4.27   | 943.05   | 88.22   | 0.16        |  |
|          | Sum           | 100.00 | 22091.59 |         |             |  |

**Sample name:** KD 1100 A2  
**Data file:** C:\SNOOPY\KD\KD 1100 A2 IC.D  
**Description:** Laufmittel: n-Heptan/EtOH 9:1 ; Die Probe ist DCM/LM gelöst.

**Injection date:** 5/4/2015 3:35:48 PM  
**Acq. Analysis method:** CHIRALPAKIC1-6LNP.M

**Column:** Chiralpak IC, (150 x 4,6) mm, 5µ, SN: IC00CD-QF015

**Pressure at start:** 38 bar      **Start flow:** 1.000 ml/min      **Column oven:** 30 °C

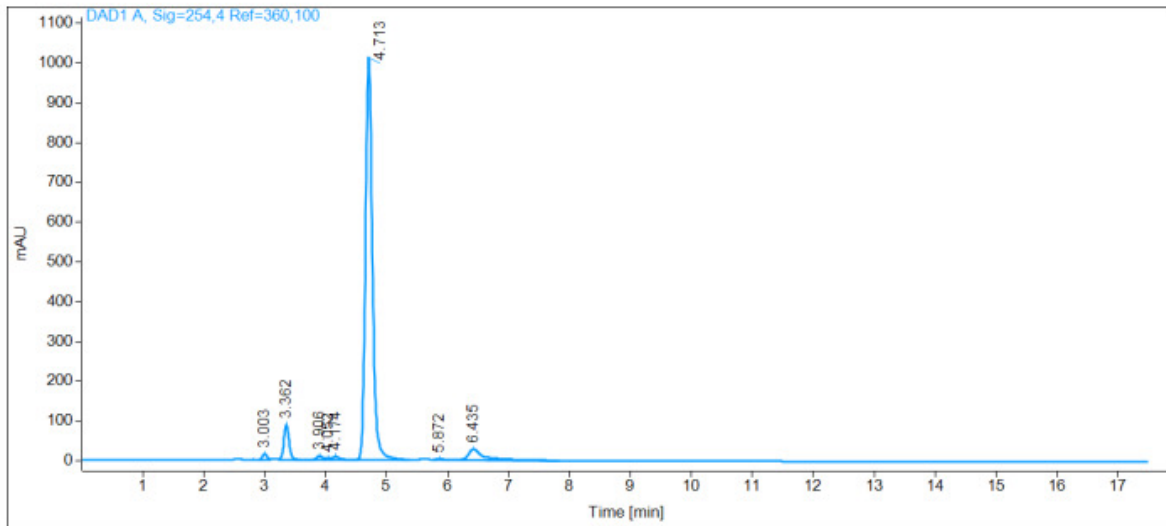

| Name | RT [min] | Type | Area%  | Area    | Height  | Width [min] |
|------|----------|------|--------|---------|---------|-------------|
|      | 3.00     | BV   | 0.84   | 78.32   | 15.18   | 0.08        |
|      | 3.36     | VB   | 5.68   | 527.07  | 88.62   | 0.09        |
|      | 3.91     | BV   | 0.71   | 65.57   | 9.54    | 0.10        |
|      | 4.05     | VV   | 0.35   | 32.62   | 5.37    | 0.09        |
|      | 4.17     | VB   | 0.71   | 65.81   | 8.19    | 0.12        |
|      | 4.71     | BB   | 86.21  | 7995.97 | 1012.13 | 0.12        |
|      | 5.87     | VB   | 0.13   | 12.44   | 1.34    | 0.14        |
|      | 6.43     | BB   | 5.36   | 496.73  | 27.56   | 0.25        |
|      | Sum      |      | 100.00 | 9274.53 |         |             |

Sample Name: KD 1092 A rac  
 Data file: D:\ERNIE\KD\1092ARAS.D  
 Sample Info: Laufmittel: n-Heptan/iPrOH 7:3;  
 Die Probe ist in DCM/LM gelöst

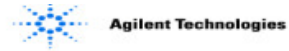

Säule: DAICELAS.M  
 Säuleninfo: Chiralpak AS (250 x 4.6)mm 10µ

Operator: Analytik Labor AKEN

Injektion Time: 10:01:36  
 Injektion Date: 22.04.2015

| Instrument Conditions: | At Start | At Stop |
|------------------------|----------|---------|
| Temperature in°C:      | 30.0     | 30.0    |
| Pressure in bar:       | 41.0     | 41.1    |
| Flow in ml/min:        | 1.0      | 1.0     |

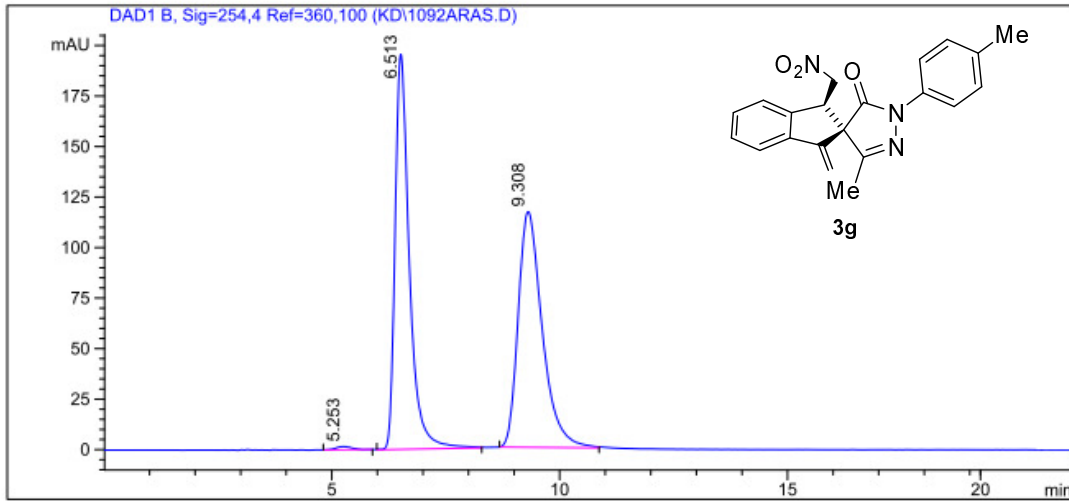

| #     | Ret. Time (min) | Width | Height (mAU) | Area (mAU*s) | Area % |
|-------|-----------------|-------|--------------|--------------|--------|
| 1     | 5.25            | 0.33  | 1.58         | 37.86        | 0.44   |
| 2     | 6.51            | 0.36  | 195.71       | 4258.81      | 49.61  |
| 3     | 9.31            | 0.56  | 116.67       | 4288.29      | 49.95  |
| Total |                 |       |              | 8584.95      | 100.00 |

Sample Name: KD 1095 A  
 Data file: D:\ERNIE\KD\1095AAS.D  
 Sample Info: Laufmittel: n-Heptan/iPrOH 7:3;  
 Die Probe ist in DCM/LM gelöst

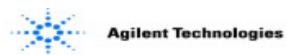

Säule: DAICELAS.M  
 Säuleninfo: Chiralpak AS (250 x 4.6)mm 10µ

Operator: Analytik Labor AKEN

Injektion Time: 10:27:42  
 Injektion Date: 22.04.2015

| Instrument Conditions: | At Start | At Stop |
|------------------------|----------|---------|
| Temperature in°C:      | 30.0     | 30.0    |
| Pressure in bar:       | 41.2     | 41.2    |
| Flow in ml/min:        | 1.0      | 1.0     |

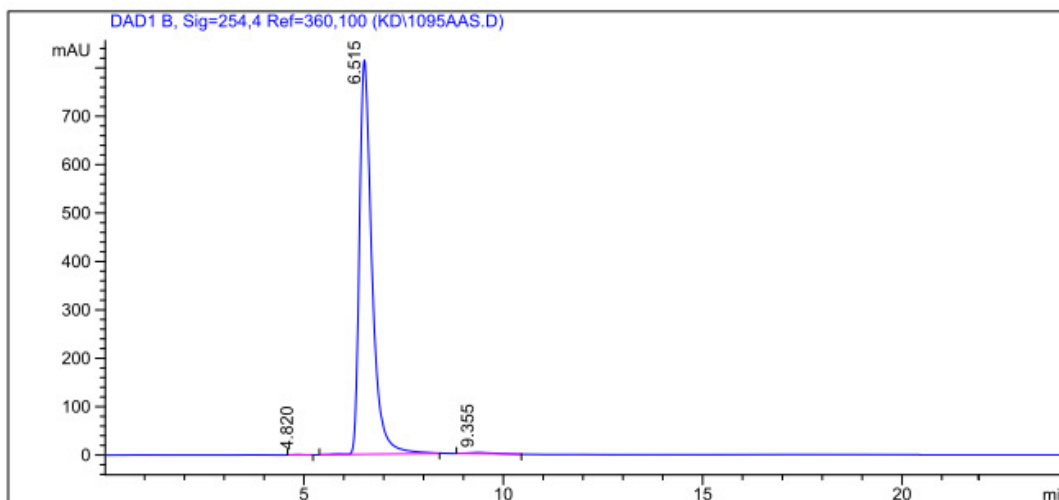

| #     | Ret. Time (min) | Width | Height (mAU) | Area (mAU*s) | Area % |
|-------|-----------------|-------|--------------|--------------|--------|
| 1     | 4.82            | 0.18  | 1.15         | 14.39        | 0.08   |
| 2     | 6.51            | 0.33  | 814.67       | 17795.78     | 99.34  |
| 3     | 9.36            | 0.50  | 2.50         | 103.38       | 0.58   |
| Total |                 |       |              | 17913.54     | 100.00 |



**Sample name:** KD 1037 A rac  
**Data file:** C:\SNOOPY\KD\1037AR1IA.D  
**Description:** Laufmittel: n-Heptan/EtOH 7:3;  
 Probe ist in DCM/LM gelöst.  
**Injection date:** 1/8/2015 2:19:23 PM  
**Acq. Analysis method:** CHIRALPAKIARNP.M

**Column:** Chiralpak IA, (250 x 4,6) mm, 5µ, SN: IA00CE-RC036

**Pressure at start:** 41 bar      **Start flow:** 0.700 ml/min      **Column oven:** 30 °C

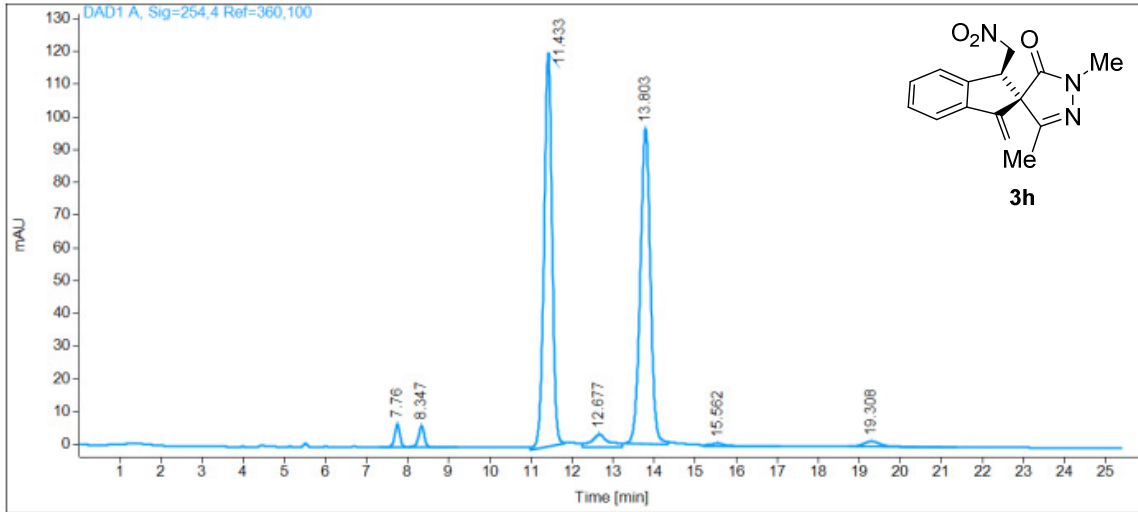

| Name     |      | KD 1037 A rac |         |        |             |  |
|----------|------|---------------|---------|--------|-------------|--|
| RT [min] | Type | Area%         | Area    | Height | Width [min] |  |
| 7.76     | BV   | 1.70          | 61.54   | 6.96   | 0.14        |  |
| 8.35     | VB   | 1.82          | 65.58   | 6.50   | 0.15        |  |
| 11.43    | MM   | 45.29         | 1635.55 | 120.07 | 0.23        |  |
| 12.68    | VV   | 3.11          | 112.36  | 3.82   | 0.41        |  |
| 13.80    | MM   | 45.74         | 1651.83 | 96.35  | 0.29        |  |
| 15.56    | VB   | 0.96          | 34.49   | 0.93   | 0.52        |  |
| 19.31    | BB   | 1.38          | 49.93   | 1.69   | 0.45        |  |
|          | Sum  | 100.00        | 3611.28 |        |             |  |

**Sample name:** KD 1101 A  
**Data file:** C:\SNOOPY\KD\1101A.D  
**Description:** Laufmittel: n-Heptan/ETOH 7:3;  
 Probe ist in DCM/LM gelöst  
**Injection date:** 4/22/2015 11:37:59 AM  
**Acq. Analysis method:** CHIRALPAKIARNP.M

**Column:** Chiralpak IA, (250 x 4,6) mm, 5µ, SN: IA00CE-RC036

**Pressure at start:** 42 bar      **Start flow:** 0.700 ml/min      **Column oven:** 29.99 °C

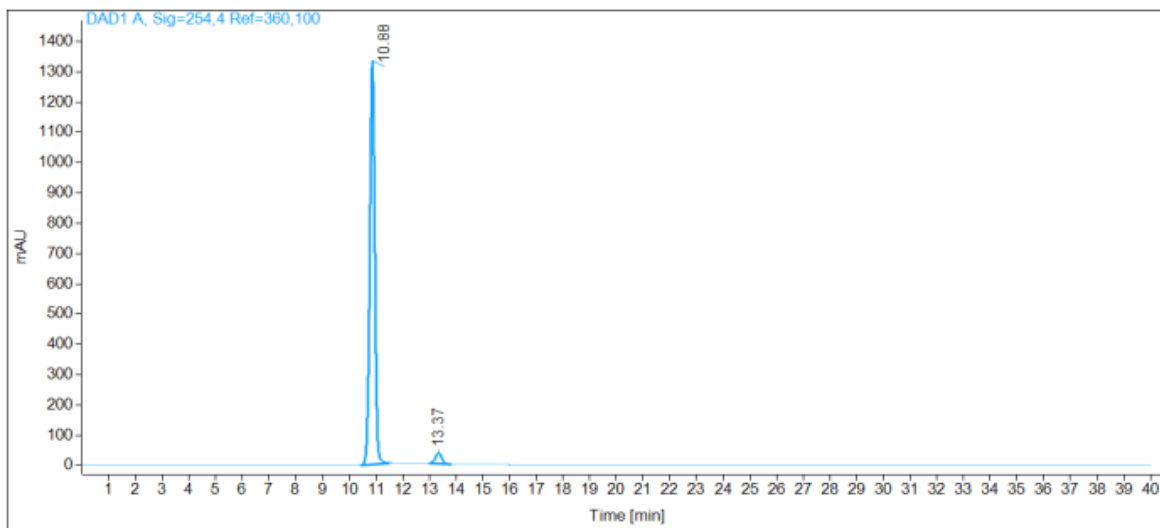

| Name     |      | KD 1101 A |          |         |             |
|----------|------|-----------|----------|---------|-------------|
| RT [min] | Type | Area%     | Area     | Height  | Width [min] |
| 10.88    | MM   | 96.58     | 17299.20 | 1333.67 | 0.22        |
| 13.37    | MM   | 3.42      | 612.36   | 35.98   | 0.28        |
| Sum      |      | 100.00    | 17911.55 |         |             |

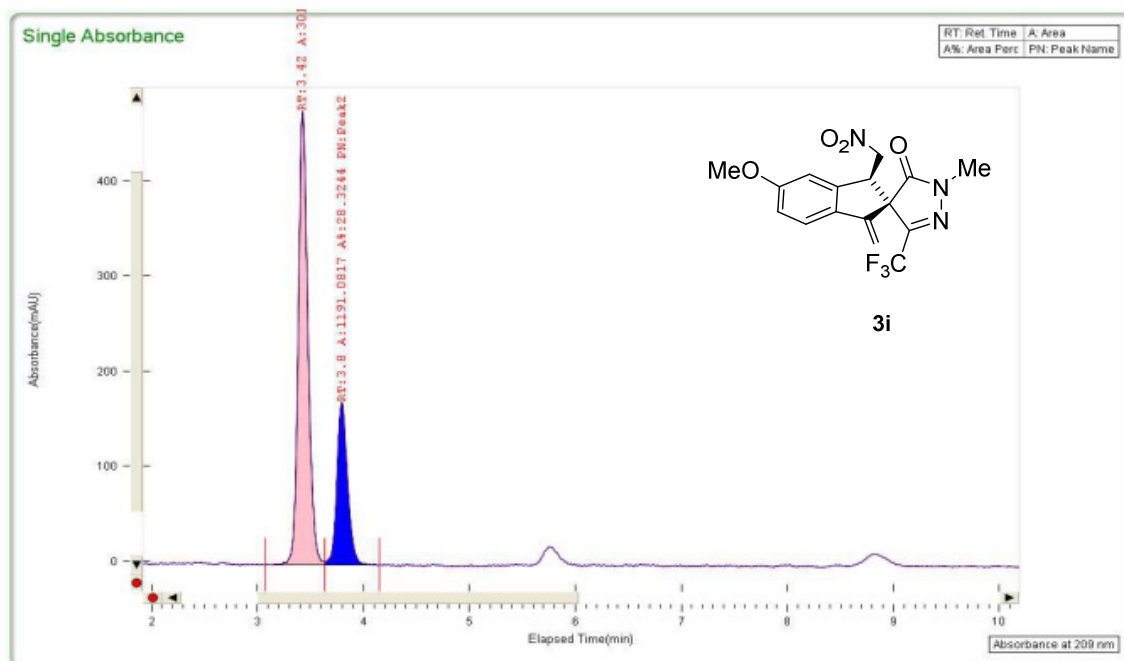

### General Info

Log Author  
Log Date 4/22/2015 5:08:35 PM  
Report By current\_User

Report Date 9/30/2015  
Method Name 4ml\_3.met  
Notes

### Injection Info

Inj Vol 5  
Solvent Ethanol  
Column R(R)-WHELK-01  
Sample AKEn-KD-1098-A  
Well location P1: 5A

Temp 37.9  
Flow 4  
% Modifier 3  
Pressure 151

### Peak Info

| Peak No | % Area  | Area      | RT (min) | Height (mV) | K'     |
|---------|---------|-----------|----------|-------------|--------|
| 1       | 71.6756 | 3014.064  | 3.42     | 477.2136    | 0.0033 |
| 2       | 28.3244 | 1191.0817 | 3.8      | 170.8121    | 0.0037 |
| Total:  | 100     | 4205.1457 |          |             |        |

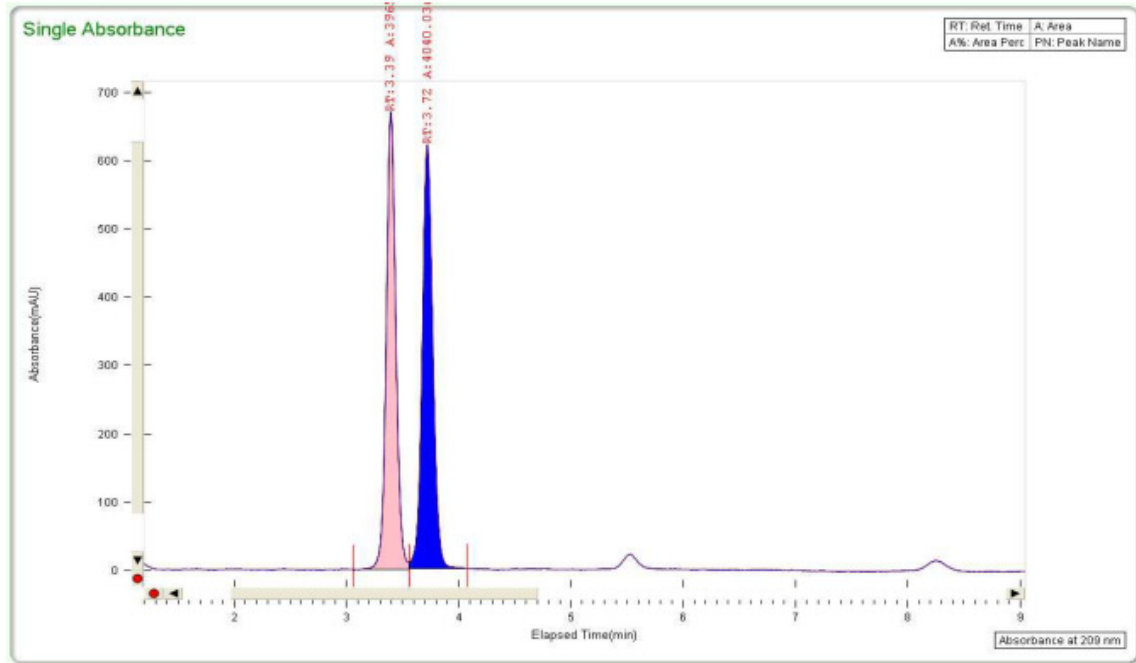

|                                       |                              |
|---------------------------------------|------------------------------|
| <b>General Info</b>                   | <b>Report Date</b> 9/30/2015 |
| <b>Log Author</b>                     | <b>Method Name</b> 4ml_3.met |
| <b>Log Date</b> 3/30/2015 10:56:53 AM | <b>Notes</b>                 |
| <b>Report By</b> current_User         |                              |

|                             |                     |
|-----------------------------|---------------------|
| <b>Injection Info</b>       | <b>Temp</b> 38      |
| <b>Inj Vol</b> 5            | <b>Flow</b> 4       |
| <b>Solvent</b> Methanol     | <b>% Modifier</b> 3 |
| <b>Column</b> R(R)-Whelk-01 | <b>Pressure</b> 149 |
| <b>Sample</b> AKEn-KD-1036  |                     |
| <b>Well location</b> P2: 2A |                     |

| Peak Info |         |           |          |             |        |
|-----------|---------|-----------|----------|-------------|--------|
| Peak No   | % Area  | Area      | RT (min) | Height (mV) | K'     |
| 1         | 49.5365 | 3965.8295 | 3.39     | 670.5       | 0.0052 |
| 2         | 50.4635 | 4040.0365 | 3.72     | 621.4785    | 0.0057 |
| Total:    | 100     | 8005.866  |          |             |        |

Sample Name: KD 1104 A rac  
 Data file: D:\GONZO\KD\1104RIB.D  
 Sample Info: Laufmittel: n-Heptan/EtOH 7:3;  
 Die Probe ist in DCM/LM gelöst.

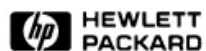

->

Säule: DAICELIB.M  
 Säuleninfo: Chiralcel OD (250x4,6)mm **Chiralpak IB**  
 Operator: Analytik Labor AKEN

Injektion Time: 08:36:11  
 Injektion Date: 05.05.2015

Instrument Conditions: At Start At Stop  
 Temperature in °C: 30.0°C 30.0°C  
 Pressure in bar: 59.6 60.9  
 Flow in ml/min: 1.00 1.00

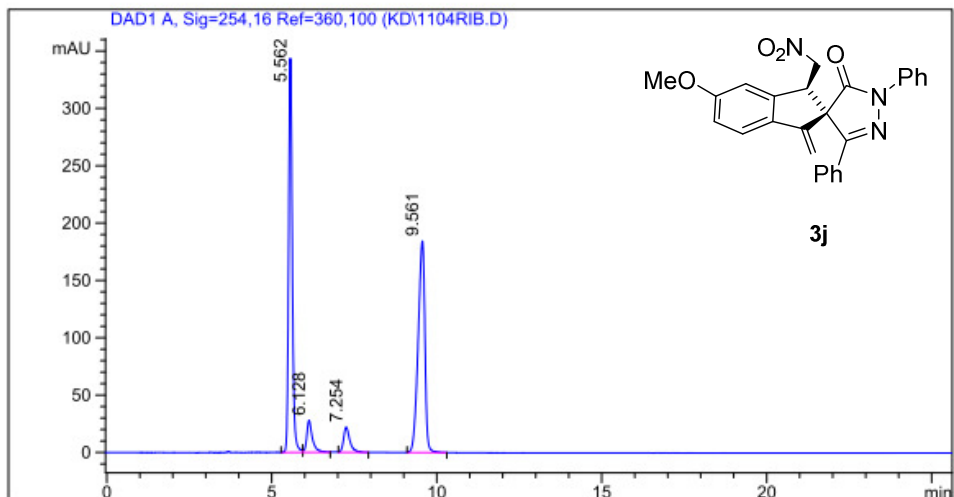

| #     | Ret. Time (min) | Width | Height (mAU) | Area (mAU*s) | Area % |
|-------|-----------------|-------|--------------|--------------|--------|
| 1     | 5.56            | 0.12  | 344.39       | 2635.23      | 44.69  |
| 2     | 6.13            | 0.18  | 27.93        | 339.06       | 5.75   |
| 3     | 7.25            | 0.20  | 22.07        | 294.53       | 4.99   |
| 4     | 9.56            | 0.22  | 184.51       | 2628.24      | 44.57  |
| Total |                 |       |              | 5897.05      | 100.00 |

Sample Name: KD 1108 A  
 Data file: D:\GONZO\KD\1108AIB.D  
 Sample Info: Laufmittel: n-Heptan/EtOH 7:3;  
 Die Probe ist in DCM/LM gelöst.

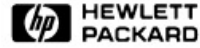

->

Säule: DAICELIB.M  
 Säuleninfo: Chiralpak IB (250x4,6)mm  
 Operator: Analytik Labor AKEN

Injektion Time: 11:00:00  
 Injektion Date: 05.05.2015

Instrument Conditions: At Start At Stop  
 Temperature in°C: 30.0°C 30.0°C  
 Pressure in bar: 60.1 60.8  
 Flow in ml/min: 1.00 1.00

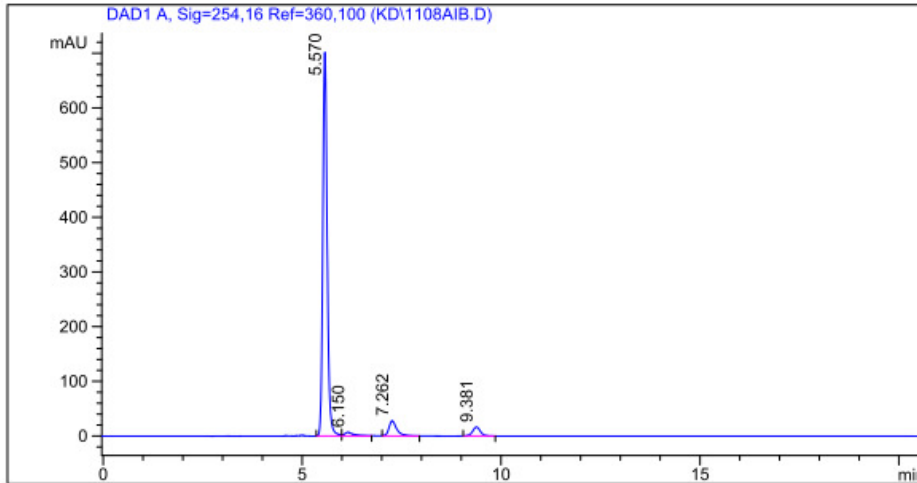

| #     | Ret. Time (min) | Width | Height (mAU) | Area (mAU*s) | Area % |
|-------|-----------------|-------|--------------|--------------|--------|
| 1     | 5.57            | 0.12  | 701.75       | 5376.00      | 88.22  |
| 2     | 6.15            | 0.23  | 6.94         | 116.37       | 1.91   |
| 3     | 7.26            | 0.20  | 27.87        | 380.90       | 6.25   |
| 4     | 9.38            | 0.21  | 16.45        | 220.51       | 3.62   |
| Total |                 |       |              | 6093.77      | 100.00 |

**Sample name:** KD 1106 A rac  
**Data file:** C:\SNOOPY\KD\1106ARIA.D  
**Description:** Laufmittel: n-Heptan/EtOH 7:3;  
 Probe ist in DCM/LM gelöst  
**Injection date:** 5/4/2015 6:40:36 PM  
**Acq. Analysis method:** CHIRALPAKIARNP.M  
**Column:** Chiralpak IA, (250 x 4,6) mm, 5µ, SN: IA00CE-RC036

**Pressure at start:** 42 bar      **Start flow:** 0.700 ml/min      **Column oven:** 30 °C

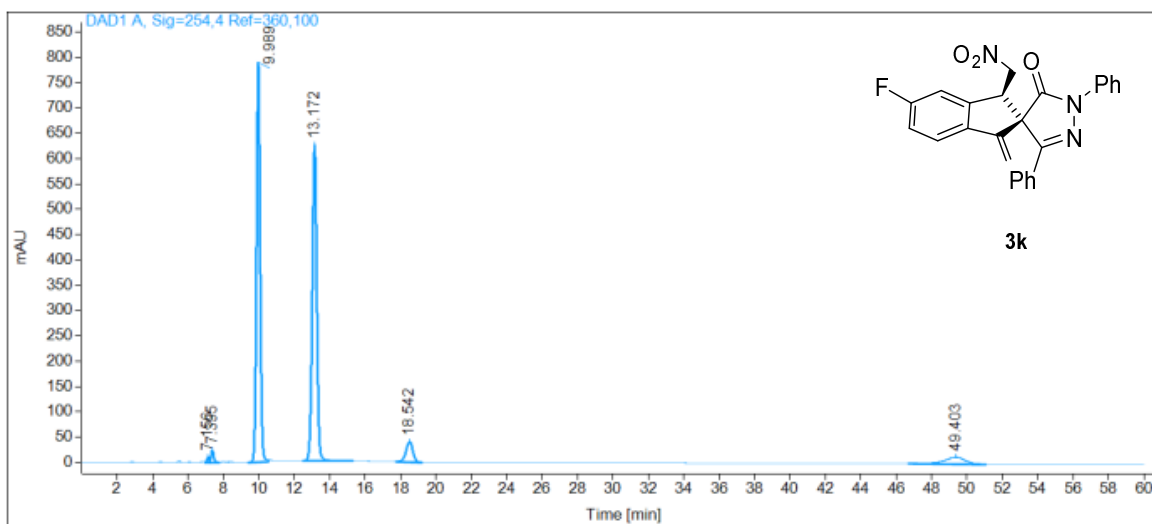

| Name     | KD 1106 A rac |        |          |        |             |  |
|----------|---------------|--------|----------|--------|-------------|--|
| RT [min] | Type          | Area%  | Area     | Height | Width [min] |  |
| 7.16     | VV            | 0.33   | 81.40    | 10.28  | 0.12        |  |
| 7.40     | VB            | 0.95   | 234.84   | 24.35  | 0.15        |  |
| 9.99     | BV            | 45.14  | 11125.46 | 789.58 | 0.22        |  |
| 13.17    | VB            | 45.02  | 11097.71 | 625.42 | 0.27        |  |
| 18.54    | VB            | 4.39   | 1083.29  | 40.07  | 0.42        |  |
| 49.40    | BBA           | 4.16   | 1026.45  | 13.02  | 1.20        |  |
|          | Sum           | 100.00 | 24649.15 |        |             |  |

**Sample name:** KD 1109 A  
**Data file:** C:\SNOOPY\KD\1109AIA.D  
**Description:** Laufmittel: n-Heptan/EtOH 7:3;  
 Probe ist in DCM/LM gelöst  
**Injection date:** 5/5/2015 1:25:16 PM  
**Acq. Analysis method:** CHIRALPAKIARNP.M

**Column:** Chiralpak IA, (250 x 4,6) mm, 5µ, SN: IA00CE-RC036

**Pressure at start:** 41 bar      **Start flow:** 0.700 ml/min      **Column oven:** 30 °C

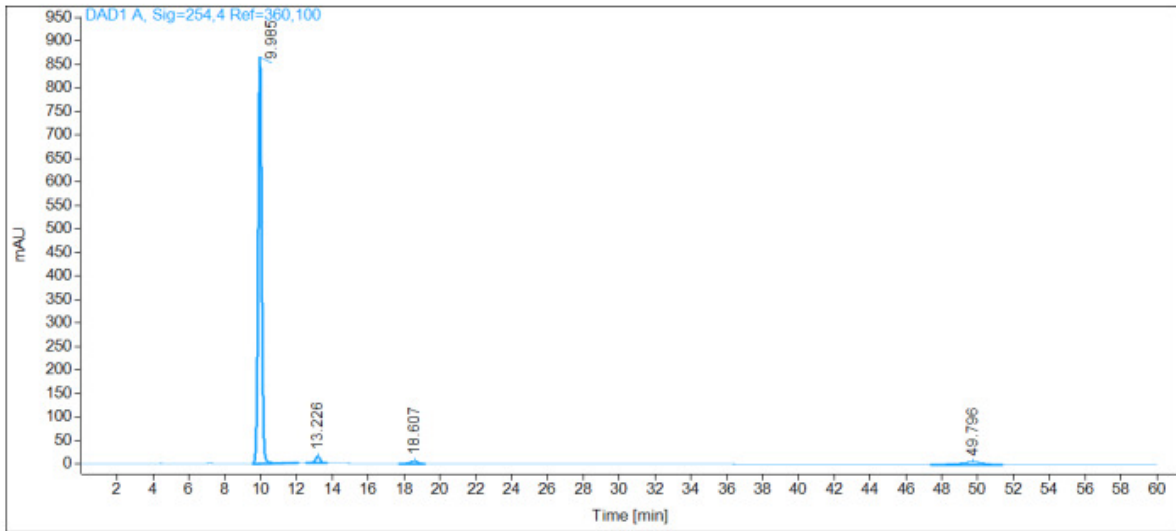

| Name     |      | KD 1109 A |          |        |             |
|----------|------|-----------|----------|--------|-------------|
| RT [min] | Type | Area%     | Area     | Height | Width [min] |
| 9.99     | BB   | 93.19     | 11873.19 | 865.45 | 0.21        |
| 13.23    | BB   | 1.99      | 252.92   | 14.11  | 0.28        |
| 18.61    | BB   | 1.31      | 167.44   | 6.17   | 0.42        |
| 49.80    | BB   | 3.52      | 447.94   | 5.56   | 1.23        |
| Sum      |      | 100.00    | 12741.49 |        |             |



Sample Name: KD 1112 A rac  
 Data file: D:\GONZO\KD\1112RAD.D  
 Sample Info: Laufmittel: n-Heptan/iPrOH 6:4  
 Die Probe ist in LM/DCM gelöst

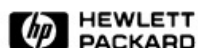

Säule: DAICELAD.M  
 Säuleninfo: Chiralpak AD (250x4,6)mm  
 Operator: Analytik Labor AKEN

Injektion Time: 16:23:36  
 Injektion Date: 06.05.2015

Instrument Conditions: At Start At Stop  
 Temperature in °C: 30.0°C 30.0°C  
 Pressure in bar: 47.5 47.4  
 Flow in ml/min: 1.00 1.00

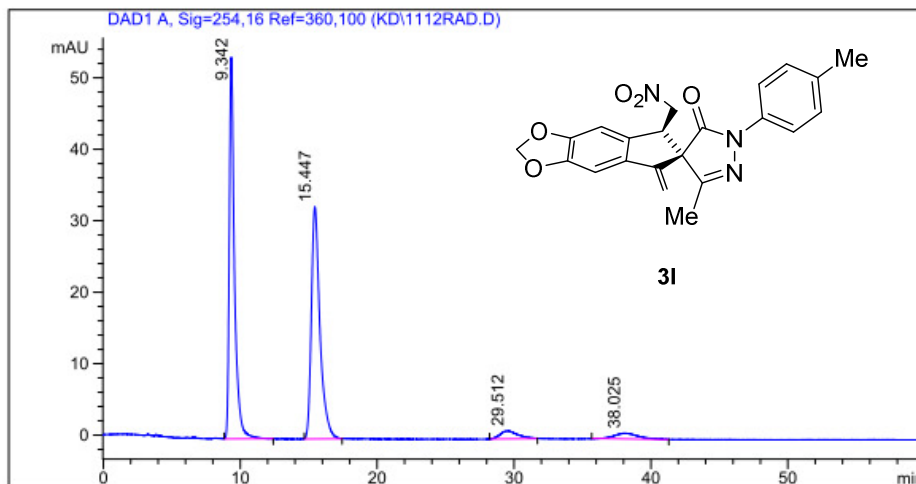

| #     | Ret. Time (min) | Width | Height (mAU) | Area (mAU*s) | Area % |
|-------|-----------------|-------|--------------|--------------|--------|
| 1     | 9.34            | 0.44  | 53.45        | 1413.17      | 46.72  |
| 2     | 15.45           | 0.65  | 32.47        | 1410.59      | 46.64  |
| 3     | 29.51           | 1.10  | 1.13         | 103.27       | 3.41   |
| 4     | 38.03           | 2.02  | 0.81         | 97.71        | 3.23   |
| Total |                 |       |              | 3024.75      | 100.00 |

Sample Name: KD 1113 A  
 Data file: D:\GONZO\KD\1113AAD.D  
 Sample Info: Laufmittel: n-Heptan/iPrOH 6:4  
 Die Probe ist in LM/DCM gelöst

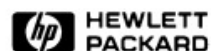

Säule: DAICELAD.M  
 Säuleninfo: Chiralpak AD (250x4,6)mm  
 Operator: Analytik Labor AKEN

Injektion Time: 08:15:32  
 Injektion Date: 07.05.2015

Instrument Conditions: At Start At Stop  
 Temperature in °C: 30.0°C 30.0°C  
 Pressure in bar: 47.7 48.8  
 Flow in ml/min: 1.00 1.00

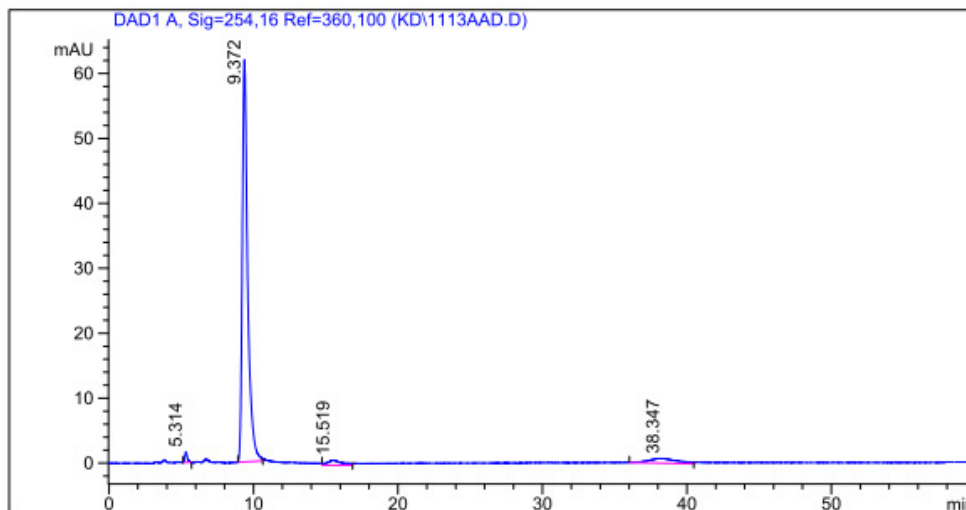

| #     | Ret. Time (min) | Width | Height (mAU) | Area (mAU*s) | Area % |
|-------|-----------------|-------|--------------|--------------|--------|
| 1     | 5.31            | 0.19  | 1.62         | 20.18        | 1.13   |
| 2     | 9.37            | 0.38  | 61.89        | 1598.69      | 89.72  |
| 3     | 15.52           | 1.23  | 0.77         | 56.74        | 3.18   |
| 4     | 38.35           | 2.40  | 0.74         | 106.27       | 5.96   |
| Total |                 |       |              | 1781.88      | 100.00 |

**Sample name:** KD 1105 A rac  
**Data file:** C:\SNOOPY\KD\1105ARIC.D  
**Description:** Laufmittel: n-Heptan/iPrOH 7:3;  
 Probe ist in LM/DCM gelöst  
**Injection date:** 4/30/2015 5:23:30 PM  
**Acq. Analysis method:** CHIRALPAKIC1-6LNP.M

**Column:** Chiralpak IC, (150 x 4,6) mm, 5µ, SN: IC00CD-QF015

**Pressure at start:** 33 bar      **Start flow:** 0.700 ml/min      **Column oven:** 30.01 °C

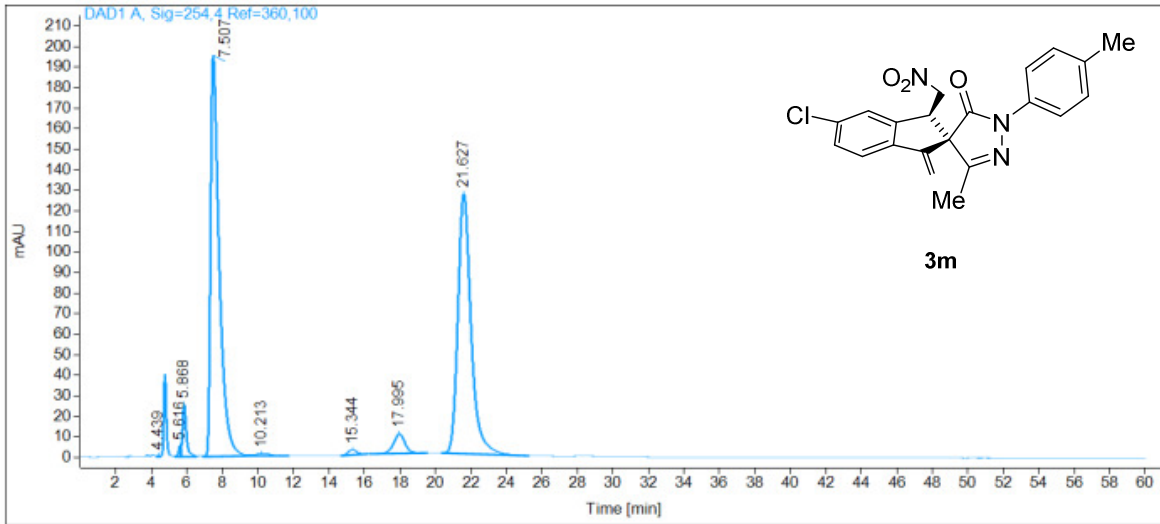

| Name | RT [min] | Type | Area%  | Area     | Height | Width [min] |
|------|----------|------|--------|----------|--------|-------------|
|      | 4.44     | VB   | 0.02   | 3.28     | 0.34   | 0.13        |
|      | 5.62     | BV   | 0.26   | 37.11    | 4.97   | 0.11        |
|      | 5.87     | VB   | 2.67   | 376.58   | 25.20  | 0.22        |
|      | 7.51     | VV   | 46.66  | 6586.09  | 195.02 | 0.50        |
|      | 10.21    | VV   | 0.53   | 75.32    | 1.20   | 0.80        |
|      | 15.34    | BB   | 0.59   | 83.82    | 2.41   | 0.54        |
|      | 18.00    | BB   | 3.02   | 426.10   | 9.41   | 0.69        |
|      | 21.63    | BB   | 46.24  | 6528.08  | 126.39 | 0.78        |
|      | Sum      |      | 100.00 | 14116.38 |        |             |

**Sample name:** KD 1110 A  
**Data file:** C:\SNOOPY\KD\KD 1110 A IC.D  
**Description:** Laufmittel: n-Heptan/iPrOH 7:3 ; Die Probe ist DCM/LM gelöst.

**Injection date:** 5/12/2015 9:56:46 AM  
**Acq. Analysis method:** CHIRALPAKIC1-6LNP.M

**Column:** Chiralpak IC, (150 x 4,6) mm, 5µ, SN: IC00CD-QF015

**Pressure at start:** 32 bar      **Start flow:** 0.700 ml/min      **Column oven:** 29.99 °C

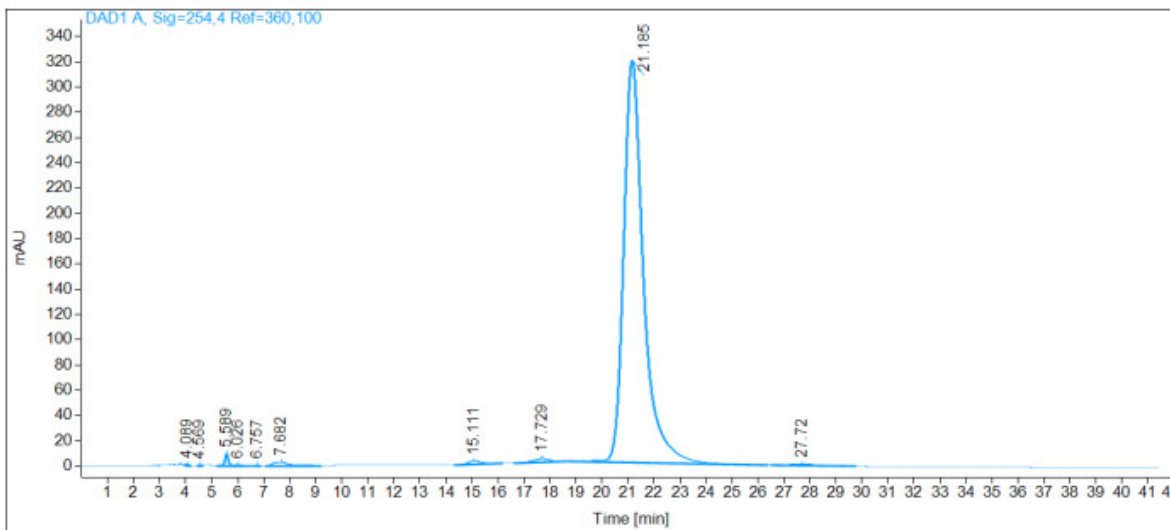

| Name | RT [min] | Type | Area%  | Area     | Height | Width [min] |
|------|----------|------|--------|----------|--------|-------------|
|      | 4.09     | VB   | 0.05   | 9.58     | 0.96   | 0.14        |
|      | 4.57     | BV   | 0.01   | 2.22     | 0.28   | 0.12        |
|      | 5.59     | BV   | 0.48   | 83.27    | 9.50   | 0.13        |
|      | 6.03     | VV   | 0.06   | 9.86     | 0.81   | 0.17        |
|      | 6.76     | VB   | 0.02   | 2.93     | 0.22   | 0.19        |
|      | 7.68     | BB   | 0.68   | 118.29   | 3.00   | 0.52        |
|      | 15.11    | BB   | 0.56   | 96.90    | 2.54   | 0.56        |
|      | 17.73    | BB   | 0.71   | 124.46   | 2.79   | 0.65        |
|      | 21.18    | BB   | 96.91  | 16883.94 | 318.53 | 0.80        |
|      | 27.72    | BB   | 0.52   | 90.88    | 1.49   | 0.80        |
|      | Sum      |      | 100.00 | 17422.34 |        |             |

Sample Name: KD 1107 A rac  
 Data file: D:\ERNIE\KD\1107RXAS.D  
 Sample Info: Laufmittel: n-Heptan/EtOH 9:1;  
 Die Probe ist in DCM/LM gelöst

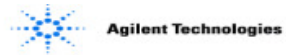

Säule: DAICELAS.M  
 Säuleninfo: Chiralpak AS (250 x 4.6)mm 10µ

Operator: Analytik Labor AKEN

Injektion Time: 11:33:37  
 Injektion Date: 18.05.2015

| Instrument Conditions: | At Start | At Stop |
|------------------------|----------|---------|
| Temperature in°C:      | 30.0     | 30.0    |
| Pressure in bar:       | 23.4     | 23.6    |
| Flow in ml/min:        | 0.7      | 0.7     |

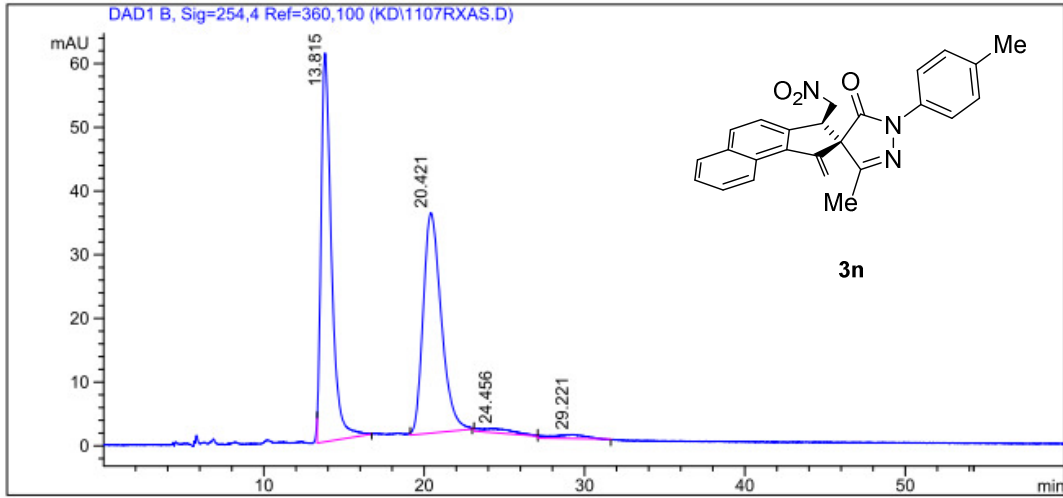

| #     | Ret. Time (min) | Width | Height (mAU) | Area (mAU*s) | Area % |
|-------|-----------------|-------|--------------|--------------|--------|
| 1     | 13.81           | 0.75  | 61.04        | 2740.97      | 48.54  |
| 2     | 20.42           | 1.31  | 34.58        | 2714.12      | 48.07  |
| 3     | 24.46           | 2.46  | 0.67         | 99.36        | 1.76   |
| 4     | 29.22           | 2.39  | 0.64         | 92.05        | 1.63   |
| Total |                 |       |              | 5646.50      | 100.00 |

Sample Name: KD 1111 A  
 Data file: D:\ERNIE\KD\1111AXAS.D  
 Sample Info: Laufmittel: n-Heptan/EtOH 9:1;  
 Die Probe ist in DCM/LM gelöst

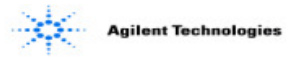

Säule: DAICELAS.M  
 Säuleninfo: Chiralpak AS (250 x 4.6)mm 10µ

Operator: Analytik Labor AKEN

Injektion Time: 12:59:02  
 Injektion Date: 18.05.2015

| Instrument Conditions: | At Start | At Stop |
|------------------------|----------|---------|
| Temperature in°C:      | 30.0     | 30.0    |
| Pressure in bar:       | 24.1     | 23.7    |
| Flow in ml/min:        | 0.7      | 0.7     |

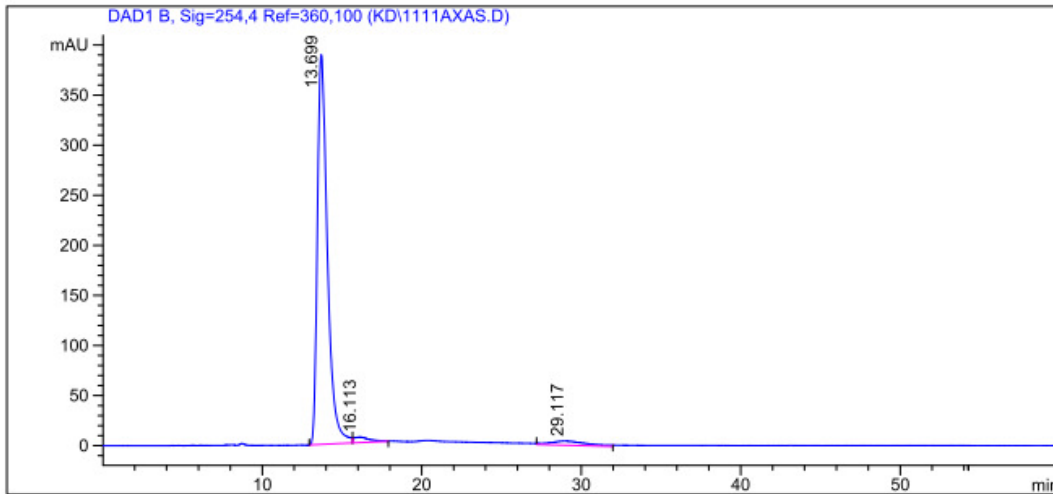

| #     | Ret. Time (min) | Width | Height (mAU) | Area (mAU*s) | Area % |
|-------|-----------------|-------|--------------|--------------|--------|
| 1     | 13.70           | 0.67  | 389.12       | 16990.23     | 93.99  |
| 2     | 16.11           | 0.83  | 5.61         | 392.27       | 2.17   |
| 3     | 29.12           | 2.75  | 4.20         | 694.88       | 3.84   |
| Total |                 |       |              | 18077.38     | 100.00 |

Sample Name: KD 1080 A rac  
 Data file: D:\GONZO\KD\1080R2AD.D  
 Sample Info: Laufmittel: n-Heptan/iPrOH 6:4  
 Die Probe ist in LM/DCM gelöst

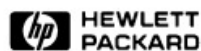

Säule: DAICELAD.M  
 Säuleninfo: Chiralpak AD (250x4,6)mm  
 Operator: Analytik Labor AKEN

Injektion Time: 09:44:07  
 Injektion Date: 13.04.2015

Instrument Conditions: At Start At Stop  
 Temperature in °C: 30.0 °C 30.0 °C  
 Pressure in bar: 48.3 48.6  
 Flow in ml/min: 1.00 1.00

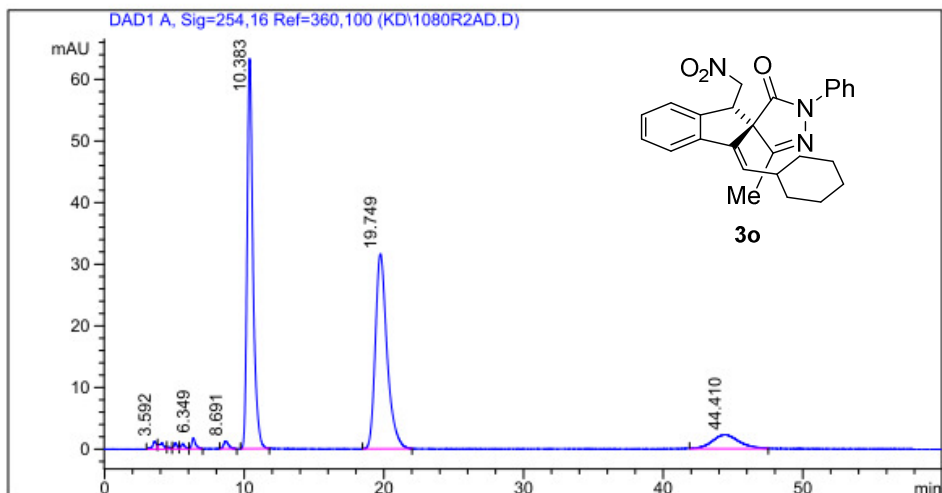

| #     | Ret. Time (min) | Width | Height (mAU) | Area (mAU*s) | Area % |
|-------|-----------------|-------|--------------|--------------|--------|
| 1     | 3.59            | 0.30  | 1.28         | 26.40        | 0.64   |
| 2     | 4.10            | 0.31  | 1.04         | 25.55        | 0.62   |
| 3     | 4.59            | 0.26  | 0.32         | 6.05         | 0.15   |
| 4     | 5.06            | 0.24  | 1.00         | 16.77        | 0.40   |
| 5     | 5.61            | 0.28  | 0.84         | 16.77        | 0.40   |
| 6     | 6.35            | 0.27  | 1.78         | 33.29        | 0.80   |
| 7     | 8.69            | 0.35  | 1.25         | 30.81        | 0.74   |
| 8     | 10.38           | 0.44  | 63.29        | 1841.86      | 44.36  |
| 9     | 19.75           | 0.88  | 31.65        | 1844.92      | 44.43  |
| 10    | 44.41           | 1.60  | 2.28         | 309.92       | 7.46   |
| Total |                 |       |              | 4152.33      | 100.00 |

Sample Name: KD 1099 A2  
 Data file: D:\GONZO\KD\1099A2AD.D  
 Sample Info: Laufmittel: n-Heptan/iPrOH 6:4  
 Die Probe ist in LM/DCM gelöst

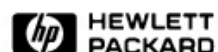

Säule: DAICELAD.M  
 Säuleninfo: Chiralpak AD (250x4,6)mm  
 Operator: Analytik Labor AKEN

Injektion Time: 14:31:12  
 Injektion Date: 06.05.2015

|                        |          |         |
|------------------------|----------|---------|
| Instrument Conditions: | At Start | At Stop |
| Temperature in °C:     | 30.0 °C  | 30.0 °C |
| Pressure in bar:       | 47.2     | 48.0    |
| Flow in ml/min:        | 1.00     | 1.00    |

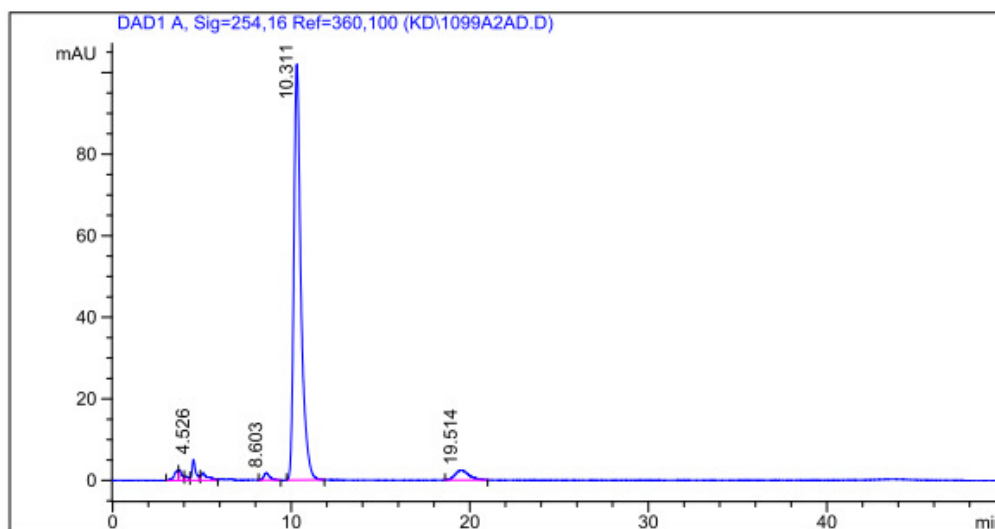

| #     | Ret. Time (min) | Width | Height (mAU) | Area (mAU*s) | Area % |
|-------|-----------------|-------|--------------|--------------|--------|
| 1     | 3.62            | 0.21  | 2.44         | 39.63        | 1.24   |
| 2     | 3.76            | 0.18  | 2.57         | 32.77        | 1.03   |
| 3     | 4.11            | 0.19  | 1.09         | 15.73        | 0.49   |
| 4     | 4.53            | 0.20  | 5.14         | 74.23        | 2.33   |
| 5     | 5.06            | 0.35  | 1.86         | 48.39        | 1.52   |
| 6     | 8.60            | 0.34  | 1.74         | 40.67        | 1.28   |
| 7     | 10.31           | 0.41  | 101.95       | 2805.66      | 87.96  |
| 8     | 19.51           | 0.77  | 2.44         | 132.53       | 4.16   |
| Total |                 |       |              | 3189.60      | 100.00 |



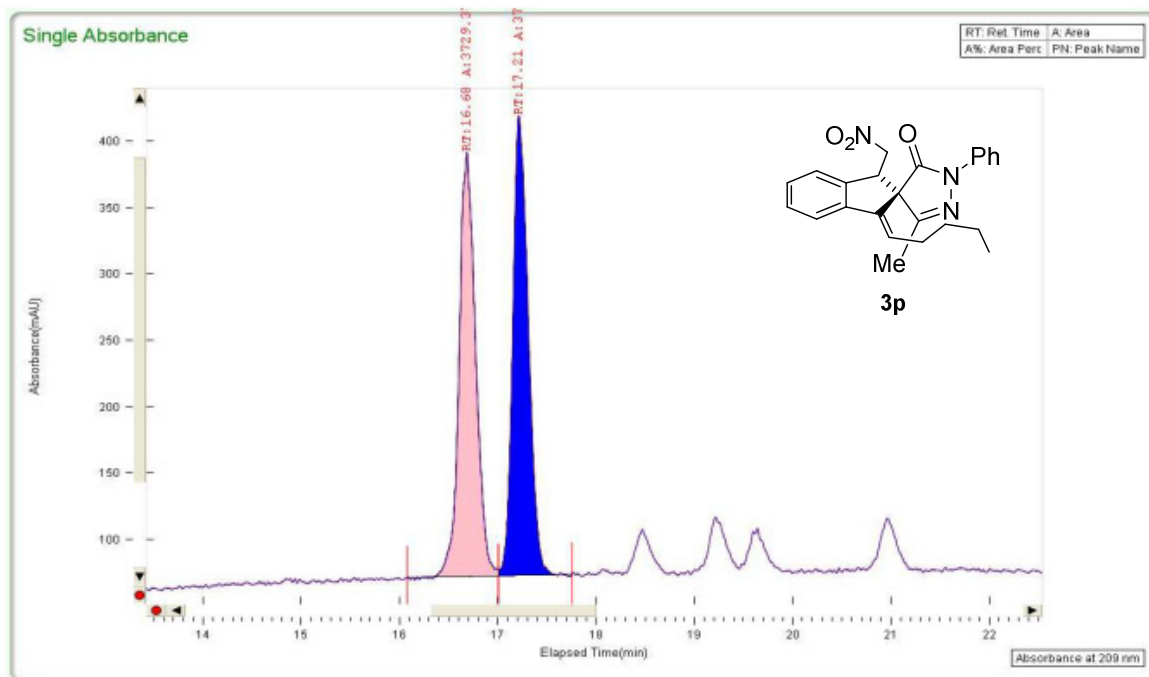

## General Info

**Log Author**  
**Log Date** 6/19/2015 10:13:43 AM  
**Report By** current\_User  
**Report Date** 9/30/2015  
**Method Name** 4ml\_1\_30\_grad\_langsam.met  
**Notes**

## Injection Info

**Inj Vol** 5  
**Solvent** Methanol  
**Column** R(R)-Whelk-01  
**Sample** AKEn\_KD-1114a  
**Well location** P2: 1D

**Temp** 37.8  
**Flow** 4  
**% Modifier** 1  
**Pressure** 148

## Peak Info

| Peak No | % Area  | Area      | RT (min) | Height (mV) | K'     |
|---------|---------|-----------|----------|-------------|--------|
| 1       | 49.7068 | 3729.3761 | 16.68    | 319.4947    | 0.0272 |
| 2       | 50.2932 | 3773.3767 | 17.21    | 346.6515    | 0.028  |
| Total:  | 100     | 7502.7528 |          |             |        |

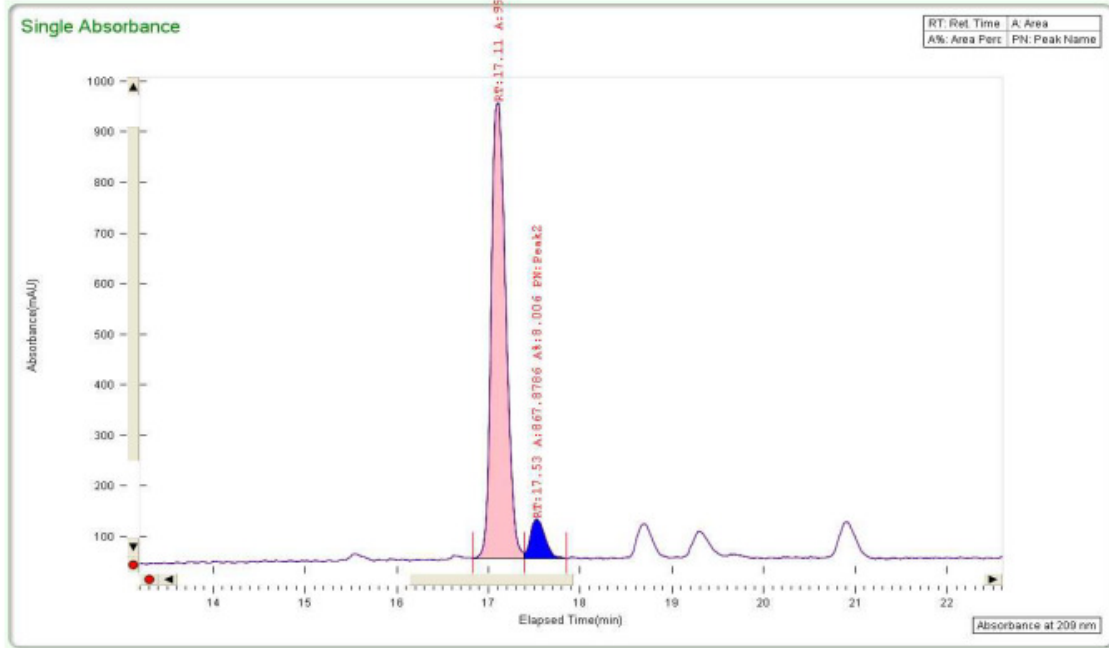

**General Info**

Log Author  
 Log Date 6/19/2015 11:51:20 AM  
 Report By current\_User  
 Report Date 9/30/2015  
 Method Name 4ml\_1\_30\_grad\_langsam.met

**Notes**

|                        |                   |     |
|------------------------|-------------------|-----|
| <b>Injection Info</b>  | <b>Temp</b>       | 38  |
| Inj Vol 5              | <b>Flow</b>       | 4   |
| Solvent Methanol       | <b>% Modifier</b> | 1   |
| Column R(R)-WheIk-01   | <b>Pressure</b>   | 150 |
| Sample AKEn_KD-1115-A2 |                   |     |
| Well location P2: 1F   |                   |     |

**Peak Info**

| Peak No | % Area | Area      | RT (min) | Height (mV) | K'     |
|---------|--------|-----------|----------|-------------|--------|
| 1       | 91.994 | 9972.4814 | 17.11    | 901.5144    | 0.024  |
| 2       | 8.006  | 867.8786  | 17.53    | 77.9865     | 0.0246 |
| Total:  | 100    | 10840.36  |          |             |        |

Sample Name: KD 1009 A rac  
 Data file: D:\GONZO\KD\1009ARAD.D  
 Sample Info: Laufmittel: n-Heptan/EtOH 7:3;  
 Die Probe ist in DCM/LM gelöst.

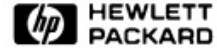

Säule: DAICELAD.M  
 Säuleninfo: Chiralpak AD (250x4,6)mm  
 Operator: Analytik Labor AKEN

Injektion Time: 08:40:58  
 Injektion Date: 31.03.2015

Instrument Conditions: At Start At Stop  
 Temperature in °C: 30.0 °C 30.0 °C  
 Pressure in bar: 21.4 21.8  
 Flow in ml/min: 0.50 0.50

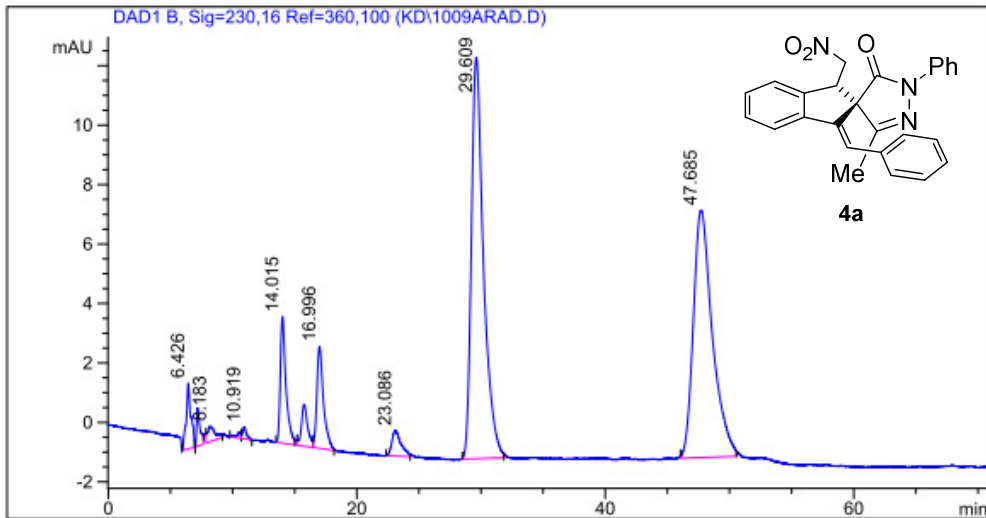

| #     | Ret. Time (min) | Width | Height (mAU) | Area (mAU*s) | Area % |
|-------|-----------------|-------|--------------|--------------|--------|
| 1     | 6.43            | 0.36  | 2.21         | 57.88        | 2.55   |
| 2     | 7.19            | 0.27  | 1.29         | 24.48        | 1.08   |
| 3     | 8.18            | 0.52  | 0.52         | 22.27        | 0.98   |
| 4     | 10.51           | 0.30  | 0.19         | 4.70         | 0.21   |
| 5     | 10.92           | 0.26  | 0.39         | 8.06         | 0.36   |
| 6     | 14.01           | 0.46  | 4.25         | 133.72       | 5.89   |
| 7     | 15.76           | 0.49  | 1.40         | 48.86        | 2.15   |
| 8     | 17.00           | 0.54  | 3.43         | 127.42       | 5.62   |
| 9     | 23.09           | 0.61  | 0.86         | 44.10        | 1.94   |
| 10    | 29.61           | 0.99  | 13.49        | 913.12       | 40.25  |
| 11    | 47.69           | 1.31  | 8.32         | 883.94       | 38.97  |
| Total |                 |       |              | 2268.54      | 100.00 |

Sample Name: KD 1076 A  
 Data file: D:\GONZO\KD\1076AAD.D  
 Sample Info: Laufmittel: n-Heptan/EtOH 7:3  
 Die Probe ist in LM/DCM gelöst

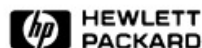

Säule: DAICELAD.M  
 Säuleninfo: Chiralpak AD (250x4,6)mm  
 Operator: Analytik Labor AKEN

Injektion Time: 09:21:03  
 Injektion Date: 07.04.2015

Instrument Conditions: At Start At Stop  
 Temperature in °C: 30.0°C 30.0°C  
 Pressure in bar: 20.7 21.0  
 Flow in ml/min: 0.50 0.50

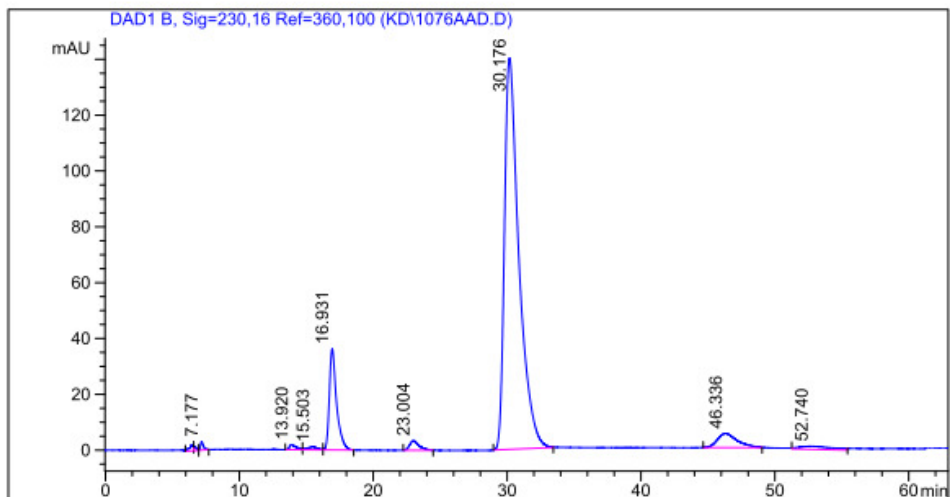

| #     | Ret. Time (min) | Width | Height (mAU) | Area (mAU*s) | Area % |
|-------|-----------------|-------|--------------|--------------|--------|
| 1     | 6.43            | 0.28  | 2.24         | 43.82        | 0.34   |
| 2     | 6.68            | 0.20  | 1.40         | 20.11        | 0.15   |
| 3     | 7.18            | 0.22  | 3.07         | 47.40        | 0.36   |
| 4     | 13.92           | 0.51  | 1.84         | 68.63        | 0.53   |
| 5     | 15.50           | 0.67  | 1.10         | 62.38        | 0.48   |
| 6     | 16.93           | 0.55  | 36.21        | 1355.40      | 10.41  |
| 7     | 23.00           | 0.67  | 3.45         | 171.96       | 1.32   |
| 8     | 30.18           | 1.10  | 140.15       | 10505.87     | 80.72  |
| 9     | 46.34           | 1.25  | 5.07         | 530.56       | 4.08   |
| 10    | 52.74           | 2.98  | 1.17         | 208.27       | 1.60   |
| Total |                 |       |              | 13014.42     | 100.00 |

Sample Name: KD 1071 A rac  
 Data file: D:\GONZO\KD\1071R2AD.D  
 Sample Info: Laufmittel: n-Heptan/iPrOH 6:4  
 Die Probe ist in LM/DCM gelöst

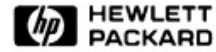

Säule: DAICELAD.M  
 Säuleninfo: Chiralpak AD (250x4,6)mm  
 Operator: Analytik Labor AKEN

Injektion Time: 08:42:54  
 Injektion Date: 13.04.2015

|                        |          |         |
|------------------------|----------|---------|
| Instrument Conditions: | At Start | At Stop |
| Temperature in °C:     | 30.0°C   | 30.0°C  |
| Pressure in bar:       | 48.2     | 49.3    |
| Flow in ml/min:        | 1.00     | 1.00    |

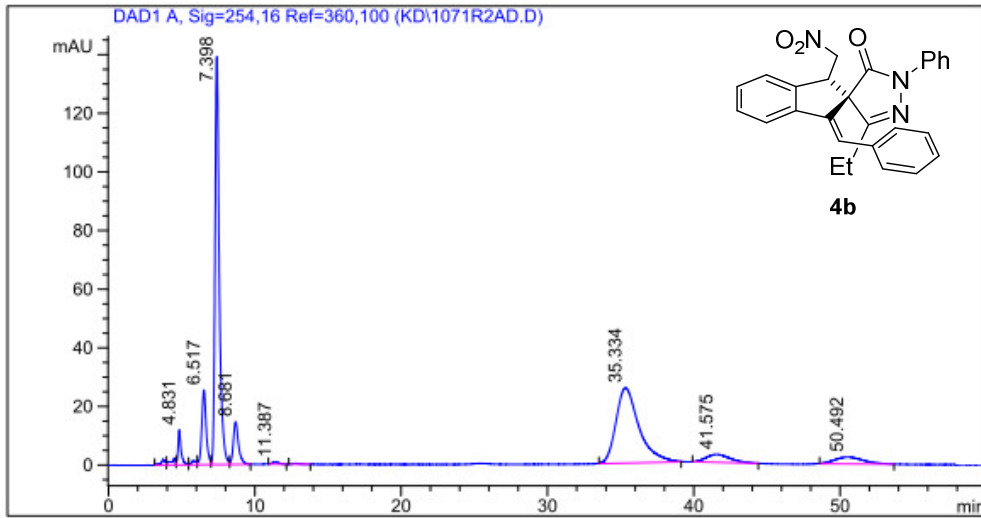

| #     | Ret. Time (min) | Width | Height (mAU) | Area (mAU*s) | Area % |
|-------|-----------------|-------|--------------|--------------|--------|
| 1     | 3.73            | 0.25  | 2.05         | 37.10        | 0.49   |
| 2     | 4.49            | 0.31  | 2.22         | 50.65        | 0.67   |
| 3     | 4.83            | 0.21  | 11.93        | 173.21       | 2.30   |
| 4     | 5.79            | 0.34  | 1.33         | 32.46        | 0.43   |
| 5     | 6.52            | 0.31  | 25.52        | 536.95       | 7.14   |
| 6     | 7.40            | 0.31  | 139.07       | 2830.78      | 37.63  |
| 7     | 8.68            | 0.37  | 14.57        | 361.80       | 4.81   |
| 8     | 11.39           | 0.46  | 0.72         | 22.71        | 0.30   |
| 9     | 12.77           | 0.47  | 0.30         | 11.05        | 0.15   |
| 10    | 35.33           | 1.63  | 25.68        | 2815.87      | 37.43  |
| 11    | 41.58           | 1.42  | 2.74         | 322.19       | 4.28   |
| 12    | 50.49           | 1.66  | 2.35         | 328.30       | 4.36   |
| Total |                 |       |              | 7523.07      | 100.00 |

Sample Name: KD 1088 A  
 Data file: D:\GONZO\KD\1088AAD.D  
 Sample Info: Laufmittel: n-Heptan/iPrOH 6:4  
 Die Probe ist in LM/DCM gelöst

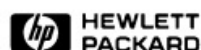

Säule: DAICELAD.M  
 Säuleninfo: Chiralpak AD (250x4,6)mm  
 Operator: Analytik Labor AKEN

Injektion Time: 15:23:24  
 Injektion Date: 16.04.2015

Instrument Conditions: At Start At Stop  
 Temperature in °C: 30.0°C 30.0°C  
 Pressure in bar: 46.7 47.4  
 Flow in ml/min: 1.00 1.00

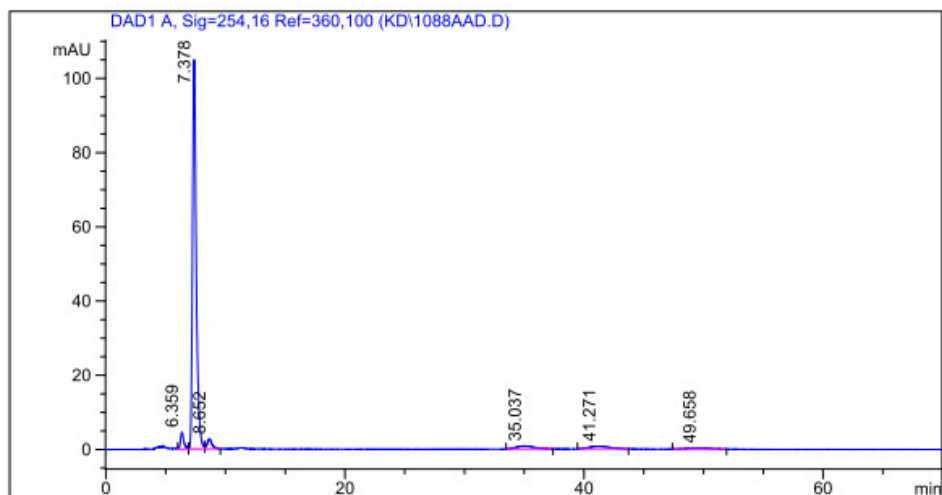

| #     | Ret. Time (min) | Width | Height (mAU) | Area (mAU*s) | Area % |
|-------|-----------------|-------|--------------|--------------|--------|
| 1     | 6.36            | 0.30  | 4.54         | 90.38        | 3.42   |
| 2     | 7.38            | 0.32  | 104.91       | 2263.49      | 85.57  |
| 3     | 8.65            | 0.42  | 2.65         | 75.42        | 2.85   |
| 4     | 35.04           | 1.24  | 0.83         | 86.89        | 3.28   |
| 5     | 41.27           | 1.42  | 0.73         | 87.41        | 3.30   |
| 6     | 49.66           | 2.18  | 0.32         | 41.69        | 1.58   |
| Total |                 |       |              | 2645.28      | 100.00 |

**Sample name:** KD 1072 A rac  
**Data file:** C:\SNOOPY\KD\1072ARIA.D  
**Description:** Laufmittel: n-Heptan/EtOH 7:3;  
 Probe ist in DCM/LM gelöst  
**Injection date:** 4/22/2015 12:19:04 PM  
**Acq. Analysis method:** CHIRALPAKIARNP.M

**Column:** Chiralpak IA, (250 x 4,6) mm, 5µ, SN: IA00CE-RC036

**Pressure at start:** 42 bar      **Start flow:** 0.700 ml/min      **Column oven:** 29.98 °C

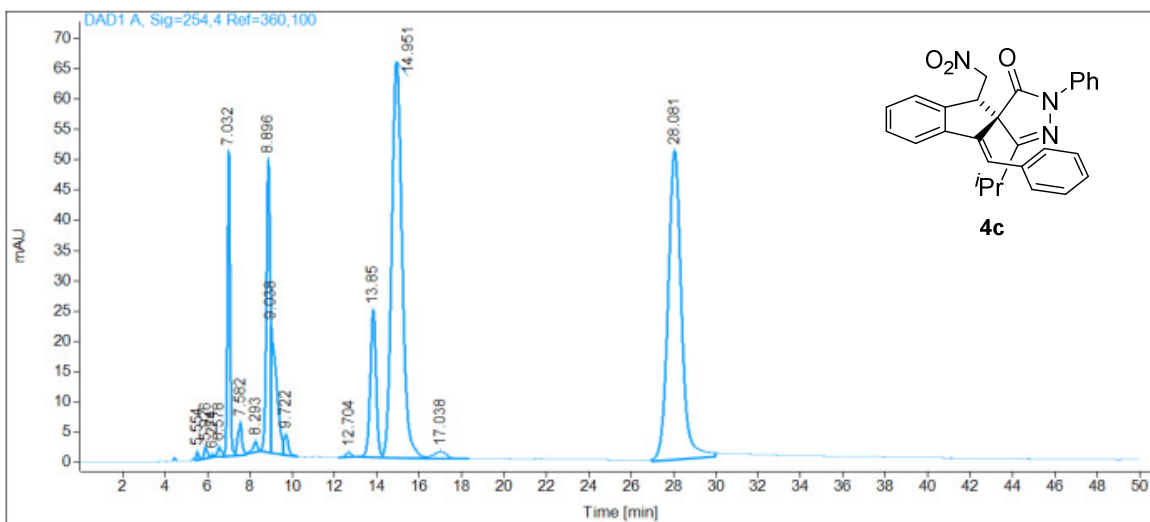

| Name     | KD 1072 A rac |        |         |        |             |  |
|----------|---------------|--------|---------|--------|-------------|--|
| RT [min] | Type          | Area%  | Area    | Height | Width [min] |  |
| 5.55     | VB            | 0.15   | 9.94    | 1.27   | 0.12        |  |
| 5.93     | BB            | 0.28   | 18.18   | 1.80   | 0.14        |  |
| 6.27     | BV            | 0.05   | 3.14    | 0.44   | 0.11        |  |
| 6.58     | VV            | 0.32   | 20.89   | 1.53   | 0.19        |  |
| 7.03     | VV            | 6.55   | 429.12  | 50.29  | 0.13        |  |
| 7.58     | VB            | 1.09   | 71.28   | 5.27   | 0.19        |  |
| 8.29     | BB            | 0.41   | 26.89   | 1.79   | 0.22        |  |
| 8.90     | MF            | 9.30   | 609.80  | 48.45  | 0.21        |  |
| 9.04     | FM            | 5.18   | 339.79  | 20.99  | 0.27        |  |
| 9.72     | VB            | 0.77   | 50.31   | 3.35   | 0.22        |  |
| 12.70    | BB            | 0.19   | 12.67   | 0.76   | 0.26        |  |
| 13.85    | BV            | 7.07   | 463.38  | 24.18  | 0.30        |  |
| 14.95    | VV            | 34.00  | 2228.68 | 65.40  | 0.53        |  |
| 17.04    | VB            | 0.69   | 45.45   | 1.12   | 0.62        |  |
| 28.08    | MM            | 33.95  | 2225.02 | 51.00  | 0.73        |  |
|          | Sum           | 100.00 | 6554.54 |        |             |  |

Sample name: **KD 1089 A**

Data file: C:\SNOOPY\KD\1089A\A.D

Description: Laufmittel: n-Heptan/EtOH 7:3;  
Probe ist in DCM/LM gelöst

Injection date: 4/22/2015 1:41:17 PM

Acq. Analysis method: CHIRALPAKIARNP.M

Column: Chiralpak IA, (250 x 4,6) mm, 5 $\mu$ , SN: IA00CE-RC036

Pressure at start: 41 bar

Start flow: 0.700 ml/min

Column oven: 29.99 °C

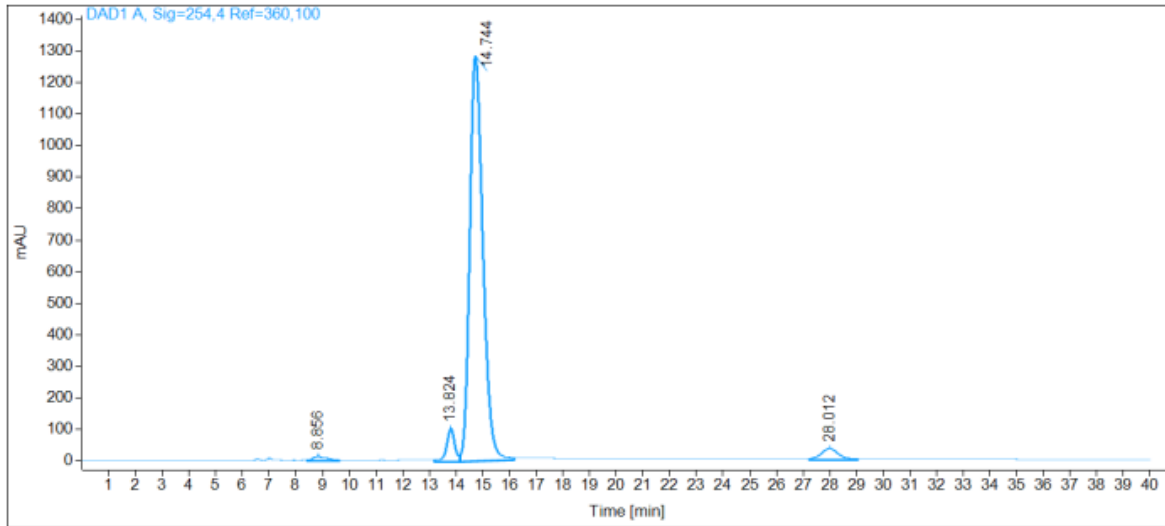

Name **KD 1089 A**

| RT [min] | Type | Area%  | Area     | Height  | Width [min] |
|----------|------|--------|----------|---------|-------------|
| 8.86     | VV   | 0.83   | 399.27   | 12.59   | 0.46        |
| 13.82    | MF   | 4.68   | 2264.96  | 104.49  | 0.36        |
| 14.74    | FM   | 90.72  | 43866.96 | 1284.27 | 0.57        |
| 28.01    | MM   | 3.77   | 1821.40  | 37.09   | 0.82        |
|          | Sum  | 100.00 | 48352.60 |         |             |



Sample Name: KD 1070 A rac  
 Data file: D:\GONZO\KD\1070R1AD.D  
 Sample Info: Laufmittel: n-Heptan/iPrOH 6:4;  
 Die Probe ist in DCM/LM gelöst.

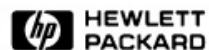

->

Säule: DAICELAD.M  
 Säuleninfo: Chiralpak AD (250x4,6)mm  
 Operator: Analytik Labor AKEN

Injektion Time: 14:53:42  
 Injektion Date: 21.04.2015

| Instrument Conditions: | At Start | At Stop |
|------------------------|----------|---------|
| Temperature in °C:     | 30.0°C   | 30.0°C  |
| Pressure in bar:       | 47.5     | 47.7    |
| Flow in ml/min:        | 1.00     | 1.00    |

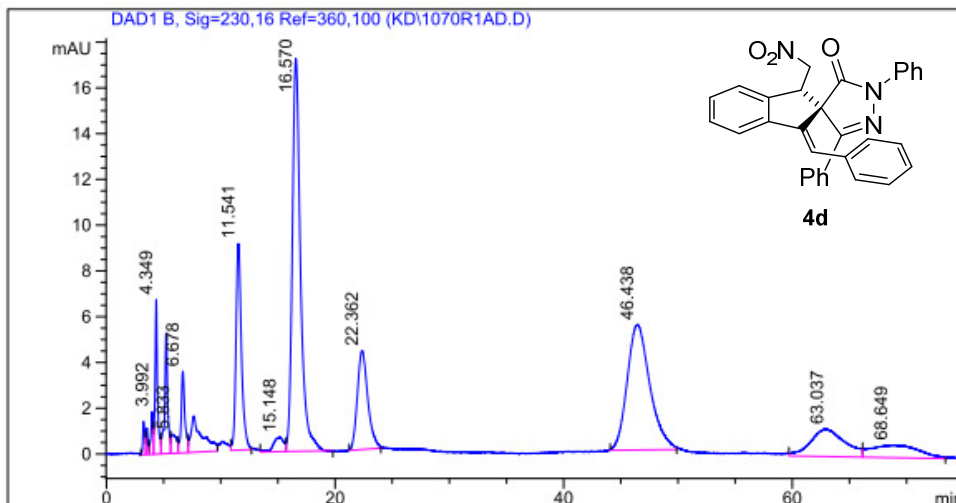

| #     | Ret. Time (min) | Width | Height (mAU) | Area (mAU*s) | Area % |
|-------|-----------------|-------|--------------|--------------|--------|
| 1     | 3.24            | 0.18  | 1.46         | 19.67        | 0.63   |
| 2     | 3.53            | 0.15  | 1.16         | 12.74        | 0.41   |
| 3     | 3.99            | 0.19  | 1.87         | 25.16        | 0.81   |
| 4     | 4.35            | 0.21  | 6.76         | 99.46        | 3.20   |
| 5     | 5.22            | 0.26  | 5.27         | 97.73        | 3.14   |
| 6     | 5.83            | 0.41  | 0.83         | 27.54        | 0.89   |
| 7     | 6.68            | 0.32  | 3.56         | 79.22        | 2.55   |
| 8     | 7.64            | 0.86  | 1.59         | 108.14       | 3.48   |
| 9     | 11.54           | 0.50  | 9.03         | 300.96       | 9.68   |
| 10    | 15.15           | 1.06  | 0.63         | 39.82        | 1.28   |
| 11    | 16.57           | 0.83  | 17.16        | 854.32       | 27.48  |
| 12    | 22.36           | 0.82  | 4.32         | 275.32       | 8.86   |
| 13    | 46.44           | 1.64  | 5.47         | 757.50       | 24.37  |
| 14    | 63.04           | 3.48  | 1.20         | 250.73       | 8.07   |
| 15    | 68.65           | 4.83  | 0.55         | 160.03       | 5.15   |
| Total |                 |       |              | 3108.34      | 100.00 |

Sample Name: KD 1090 A  
 Data file: D:\GONZO\KD\1090AAD.D  
 Sample Info: Laufmittel: n-Heptan/iPrOH 6:4  
 Die Probe ist in LM/DCM gelöst

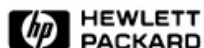

Säule: DAICELAD.M  
 Säuleninfo: Chiralpak AD (250x4,6)mm  
 Operator: Analytik Labor AKEN

Injektion Time: 16:12:30  
 Injektion Date: 21.04.2015

Instrument Conditions: At Start At Stop  
 Temperature in °C: 30.0°C 30.0°C  
 Pressure in bar: 46.8 48.1  
 Flow in ml/min: 1.00 1.00

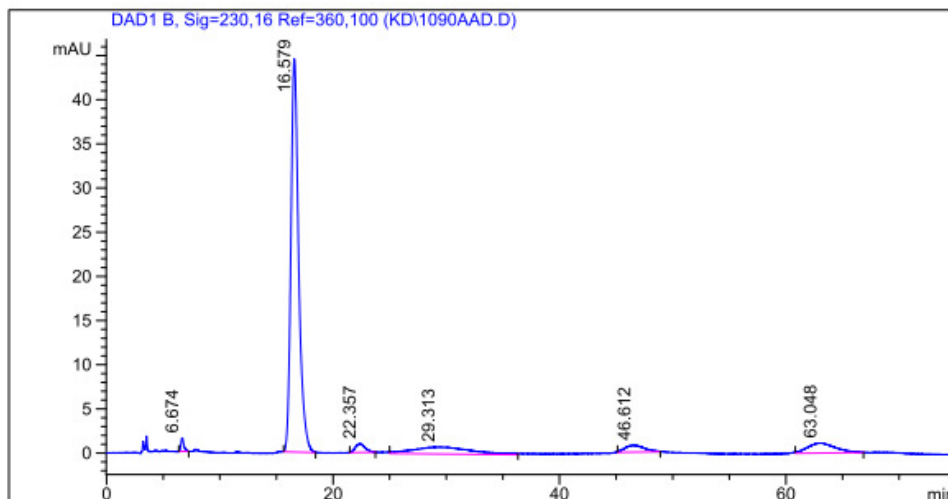

| #     | Ret. Time (min) | Width | Height (mAU) | Area (mAU*s) | Area % |
|-------|-----------------|-------|--------------|--------------|--------|
| 1     | 6.67            | 0.26  | 1.53         | 27.01        | 0.97   |
| 2     | 16.58           | 0.71  | 44.49        | 2105.91      | 75.82  |
| 3     | 22.36           | 0.72  | 0.99         | 59.55        | 2.14   |
| 4     | 29.31           | 6.12  | 0.80         | 293.10       | 10.55  |
| 5     | 46.61           | 1.42  | 0.79         | 95.74        | 3.45   |
| 6     | 63.05           | 2.02  | 1.14         | 196.17       | 7.06   |
| Total |                 |       |              | 2777.48      | 100.00 |

**Sample name:** DH NS 17 rac  
**Data file:** C:\SNOOPY\DH\DH NS 17 RAC IA.D  
**Description:** Laufmittel: n-Heptan/EtOH 7:3 Die Probe ist DCM/LM gelöst.

**Injection date:** 10/1/2014 12:52:52 PM  
**Acq. Analysis method:** CHIRALPAKIARNP.M

**Column:** Chiralpak IA, (250 x 4,6) mm, 5µ, SN: IA00CE-RC036

**Pressure at start:** 42 bar      **Start flow:** 0.700 ml/min      **Column oven:** 30 °C

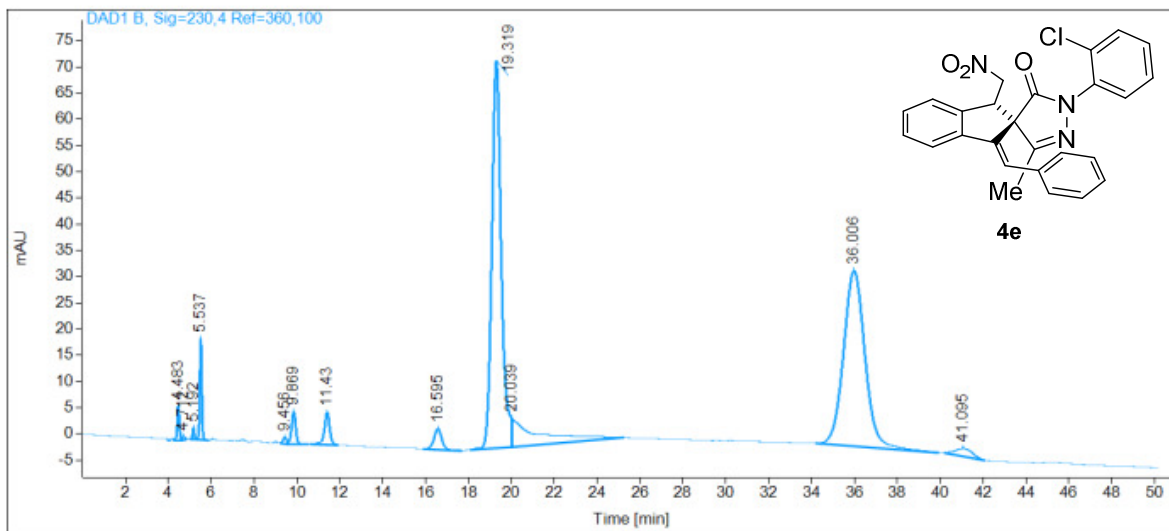

| Name     | DH NS 17 rac |  | Area%  | Area    | Height | Width [min] |
|----------|--------------|--|--------|---------|--------|-------------|
| RT [min] | Type         |  |        |         |        |             |
| 4.48     | VV           |  | 0.82   | 45.90   | 6.58   | 0.11        |
| 4.71     | VV           |  | 0.13   | 7.16    | 0.67   | 0.17        |
| 5.19     | BV           |  | 0.24   | 13.69   | 2.32   | 0.09        |
| 5.54     | VB           |  | 2.20   | 123.69  | 19.33  | 0.10        |
| 9.46     | BV           |  | 0.24   | 13.63   | 1.22   | 0.17        |
| 9.87     | VB           |  | 1.44   | 80.99   | 6.16   | 0.20        |
| 11.43    | BB           |  | 1.88   | 106.02  | 6.16   | 0.26        |
| 16.59    | BB           |  | 1.77   | 99.67   | 3.97   | 0.38        |
| 19.32    | MF           |  | 40.09  | 2257.32 | 73.92  | 0.51        |
| 20.04    | FM           |  | 8.36   | 470.93  | 5.39   | 1.46        |
| 36.01    | BB           |  | 41.34  | 2327.37 | 33.46  | 1.06        |
| 41.10    | BB           |  | 1.49   | 84.02   | 1.52   | 0.85        |
|          | Sum          |  | 100.00 | 5630.40 |        |             |

**Sample name:** KD 1086 A  
**Data file:** C:\SNOOPY\KD\KD 1086 A IA.D  
**Description:** Laufmittel: n-Heptan/EtOH 7:3 ; Die Probe ist DCM/LM gelöst.

**Injection date:** 4/15/2015 11:39:33 AM  
**Acq. Analysis method:** CHIRALPAKIARNP.M

**Column:** Chiralpak IC, (150 x 4,6) mm, 5µ, SN: IC00CD-QF015

**Pressure at start:** 41 bar      **Start flow:** 0.700 ml/min      **Column oven:** 29.99 °C

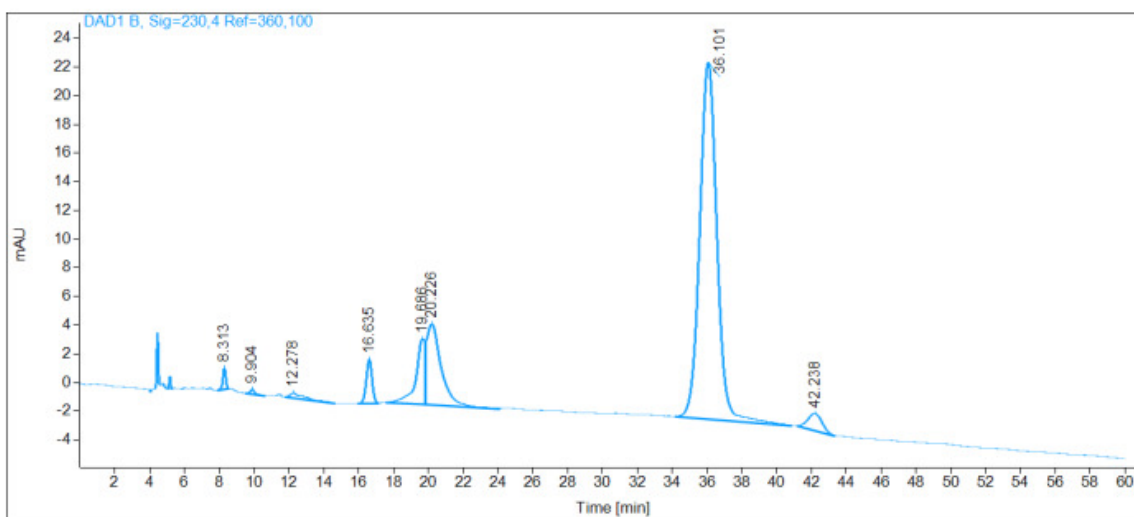

| Name | RT [min] | Type | Area%  | Area    | Height | Width [min] |
|------|----------|------|--------|---------|--------|-------------|
|      | 8.31     | BB   | 0.77   | 18.27   | 1.52   | 0.18        |
|      | 9.90     | BB   | 0.27   | 6.36    | 0.35   | 0.26        |
|      | 12.28    | BB   | 0.85   | 20.23   | 0.35   | 0.72        |
|      | 16.63    | BB   | 2.95   | 70.13   | 3.04   | 0.35        |
|      | 19.69    | BV   | 6.90   | 164.17  | 4.59   | 0.51        |
|      | 20.23    | VB   | 13.95  | 331.98  | 5.67   | 0.84        |
|      | 36.10    | BB   | 71.47  | 1701.37 | 24.89  | 1.05        |
|      | 42.24    | BB   | 2.85   | 67.90   | 1.20   | 0.74        |
|      | Sum      |      | 100.00 | 2380.42 |        |             |

**Sample name:** DH NS 18 rac  
**Data file:** C:\SNOOPY\DH\NS18RIC1.D  
**Description:** Laufmittel: n-Heptan/iPrOH 9:1;  
 Probe ist in LM/DCM gelöst  
**Injection date:** 9/29/2014 2:51:29 PM  
**Acq. Analysis method:** CHIRALPAKIC1-6LNP.M

**Column:** Chiralpak IC, (150 x 4,6) mm, 5µ, SN: IC00CD-QF015

**Pressure at start:** 23 bar      **Start flow:** 0.700 ml/min      **Column oven:** 30.01 °C

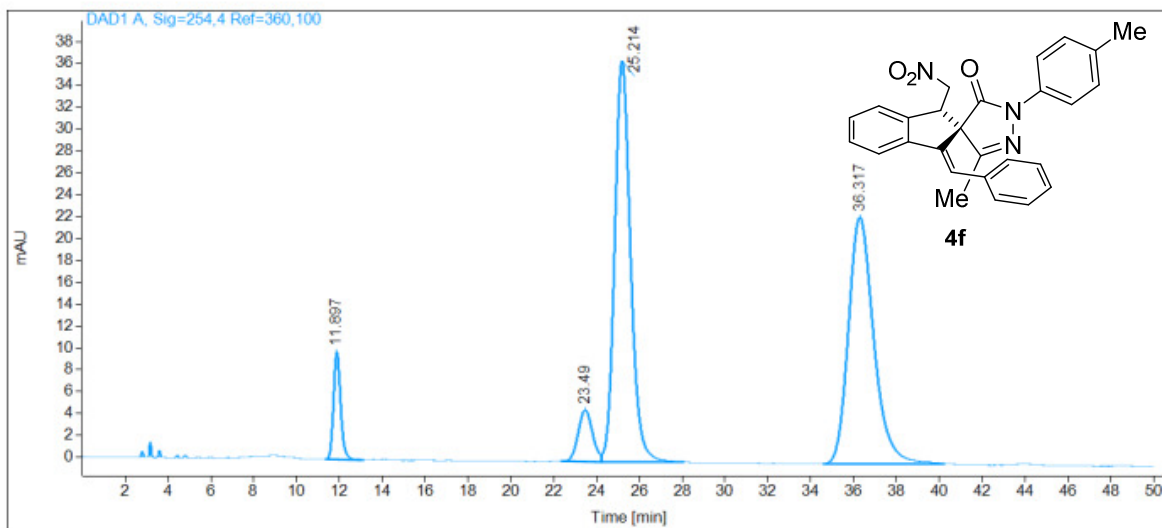

| Name     |      | DH NS 18 rac |         |        |             |  |
|----------|------|--------------|---------|--------|-------------|--|
| RT [min] | Type | Area%        | Area    | Height | Width [min] |  |
| 11.90    | BB   | 5.46         | 228.30  | 9.80   | 0.36        |  |
| 23.49    | BV   | 5.22         | 218.59  | 4.71   | 0.70        |  |
| 25.21    | VB   | 45.03        | 1884.33 | 36.62  | 0.79        |  |
| 36.32    | BB   | 44.29        | 1853.06 | 22.53  | 1.25        |  |
| Sum      |      | 100.00       | 4184.28 |        |             |  |

**Sample name:** KD 1085 A  
**Data file:** C:\SNOOPY\KD\1085ARIC.D  
**Description:** Laufmittel: n-Heptan/iPrOH 9:1;  
 Probe ist in LM/DCM gelöst  
**Injection date:** 4/14/2015 4:43:50 PM  
**Acq. Analysis method:** CHIRALPAKIC1-6LNP.M  
**Column:** Chiralpak IC, (150 x 4,6) mm, 5µ, SN: IC00CD-QF015

**Pressure at start:** 26 bar      **Start flow:** 0.700 ml/min      **Column oven:** 29.98 °C

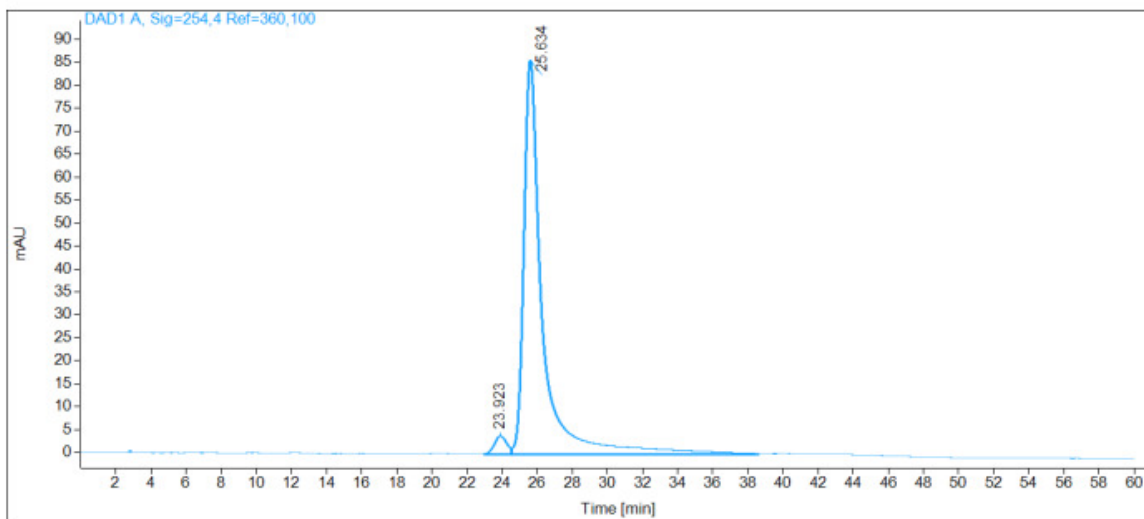

| Name     |      | KD 1085 A |         |        |             |
|----------|------|-----------|---------|--------|-------------|
| RT [min] | Type | Area%     | Area    | Height | Width [min] |
| 23.92    | BV   | 3.00      | 194.63  | 3.97   | 0.73        |
| 25.63    | VB   | 97.00     | 6295.50 | 85.80  | 1.05        |
| Sum      |      | 100.00    | 6490.12 |        |             |

Sample Name: KD 1118 A rac  
 Data file: D:\GONZO\KD\1118R1AD.D  
 Sample Info: Laufmittel: n-Heptan/iPrOH 7:3  
 Die Probe ist in LM/DCM gelöst

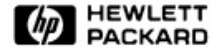

Säule: DAICELAD.M  
 Säuleninfo: Chiralpak AD (250x4,6)mm  
 Operator: Analytik Labor AKEN

Injektion Time: 12:26:21  
 Injektion Date: 22.05.2015

Instrument Conditions: At Start At Stop  
 Temperature in °C: 30.0 °C 30.0 °C  
 Pressure in bar: 20.2 21.2  
 Flow in ml/min: 0.50 0.50

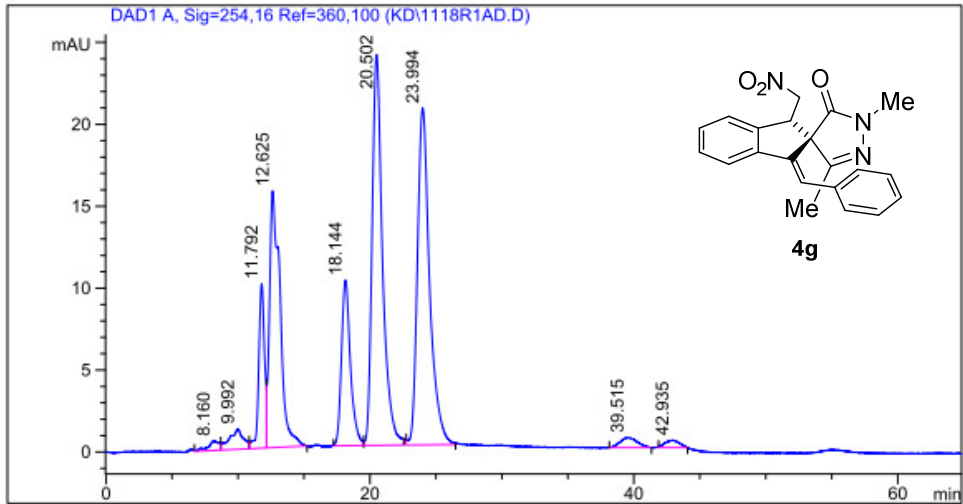

| #     | Ret. Time (min) | Width | Height (mAU) | Area (mAU*s) | Area % |
|-------|-----------------|-------|--------------|--------------|--------|
| 1     | 8.16            | 0.71  | 0.58         | 34.41        | 0.76   |
| 2     | 9.99            | 0.91  | 1.26         | 91.52        | 2.03   |
| 3     | 11.79           | 0.47  | 10.02        | 306.54       | 6.81   |
| 4     | 12.62           | 0.75  | 15.65        | 872.11       | 19.39  |
| 5     | 18.14           | 0.71  | 10.09        | 476.93       | 10.60  |
| 6     | 20.50           | 0.92  | 23.83        | 1311.77      | 29.16  |
| 7     | 23.99           | 0.96  | 20.55        | 1317.14      | 29.28  |
| 8     | 39.51           | 1.08  | 0.60         | 54.89        | 1.22   |
| 9     | 42.93           | 0.90  | 0.45         | 33.53        | 0.75   |
| Total |                 |       |              | 4498.84      | 100.00 |

Sample Name: KD 1120 A  
Data file: D:\GONZO\KD\1120AAD.D  
Sample Info: Laufmittel: n-Heptan/iPrOH 7:3  
Die Probe ist in LM/DCM gelöst

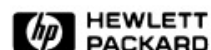

Säule: DAICELAD.M  
Säuleninfo: Chiralpak AD (250x4,6)mm  
Operator: Analytik Labor AKEN

Injektion Time: 13:32:28  
Injektion Date: 22.05.2015

| Instrument Conditions: | At Start | At Stop |
|------------------------|----------|---------|
| Temperature in °C:     | 30.0 °C  | 30.0 °C |
| Pressure in bar:       | 21.1     | 21.4    |
| Flow in ml/min:        | 0.50     | 0.50    |

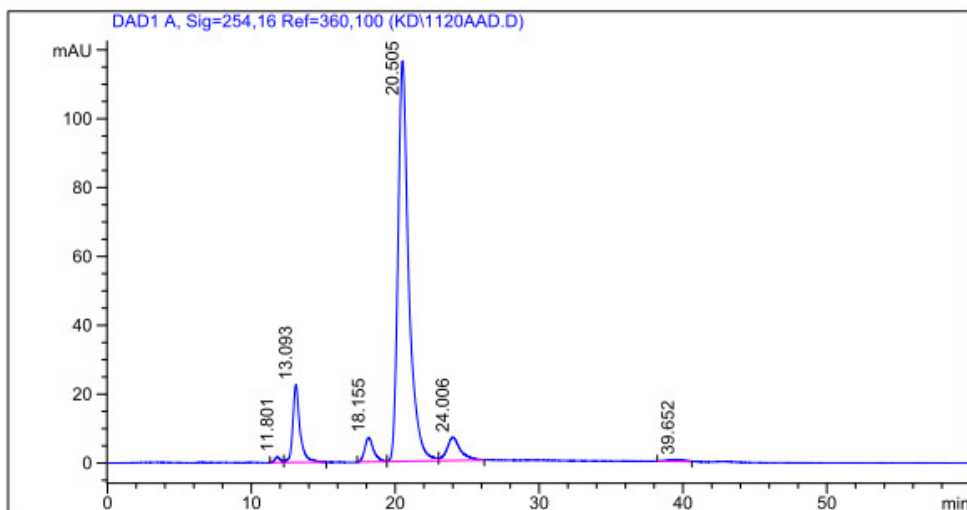

| #     | Ret. Time (min) | Width | Height (mAU) | Area (mAU*s) | Area % |
|-------|-----------------|-------|--------------|--------------|--------|
| 1     | 11.80           | 0.40  | 1.70         | 47.25        | 0.62   |
| 2     | 13.09           | 0.50  | 22.53        | 778.83       | 10.18  |
| 3     | 18.15           | 0.65  | 7.09         | 302.38       | 3.95   |
| 4     | 20.51           | 0.86  | 116.22       | 6024.90      | 78.75  |
| 5     | 24.01           | 1.10  | 6.80         | 448.29       | 5.86   |
| 6     | 39.65           | 1.05  | 0.58         | 49.48        | 0.65   |
| Total |                 |       |              | 7651.13      | 100.00 |

<sup>i</sup> B. Tan, X. Zhang, P. J. Chua, G. Zhong, *Chem. Commun.* **2009**, 779-781.
